# Supplementary material for: Comparative Transcriptome Analysis Reveals the Mechanism Associated With Dynamic Changes in Meat Quality of the Longissimus Thoracis Muscle in Tibetan Sheep at Different Growth Stages
Source: Front Vet Sci. 2022 Jul 6;9:926725. doi: 10.3389/fvets.2022.926725 (PMC9298548; doi:10.3389/fvets.2022.926725)
Supplement: Supplementary Table 2 — The summary of the RNA-seq data. [file Table_2.XLSX]

## Sheet: 4 m vs 1.5 y
DEGs in 4 m vs 1.5 y
id	A-1_fpkm	A-2_fpkm	A-3_fpkm	A-4_fpkm	B-1_fpkm	B-2_fpkm	B-3_fpkm	B-4_fpkm	A_mean	B_mean	log2(fc)	PValue	FDR	Symbol
ncbi_101108953	20.6	16.72	19.92	21.24	3.41	4.27	3.93	3.2	19.62	3.7025	-2.40575	4.24e-68	5.97e-64	PDE4D
ncbi_101119015	5.92	5.13	5.98	5.77	19.34	29.44	26.73	24.71	5.7	25.055	2.13606	1.43e-60	1.01e-56	ABCA1
ncbi_101120031	5.81	7.27	6.41	5.38	0.39	0.08	0.29	0.2	6.2175	0.24	-4.69523	7.43e-50	3.49e-46	ADAMTS8
ncbi_101107597	2.36	2.18	2.41	2.11	9.66	10.48	12.12	9.15	2.265	10.3525	2.1924	5.34e-46	1.88e-42	RPL10A
ncbi_106990107	1816.62	433.03	1264.9	475.79	4.17	3.16	7.32	4.04	997.585	4.6725	-7.7381	5.5e-44	1.55e-40	TPT1
ncbi_101107864	2.51	2.74	3.32	2.99	0.2	0.32	0.37	0.18	2.89	0.2675	-3.43346	9.57e-39	2.25e-35	COMP
ncbi_101114236	7.41	5.59	7.35	6.2	1.32	1.5	1.59	1.1	6.6375	1.3775	-2.26859	5.69e-38	1.15e-34	Fzd9
ncbi_101116374	15.3	13.3	16.18	15.21	5.52	6.64	5.8	5.85	14.9975	5.9525	-1.33315	4.5e-35	7.93e-32	P4HA1
ncbi_100820742	14.12	13.93	12.22	13.27	57.69	43.51	52.26	45.48	13.385	49.735	1.89364	5.77e-34	9.03e-31	GPX1
ncbi_100913152	0	0	0	0	137.72	657.77	630.66	118.81	0.001	386.24	18.5591	7.88e-34	1.11e-30	HSPA1B
MSTRG.13014	1.92	1.69	1.72	1.88	0.18	0.07	0.17	0.25	1.8025	0.1675	-3.42777	1.55e-30	1.99e-27	SP2
ncbi_105606262	1.08	1.3	1.94	1.55	8.04	8.82	6.91	12.35	1.4675	9.03	2.62137	3.16e-30	3.71e-27	DCXR
ncbi_101103656	18.95	19.61	20.35	19.55	9.24	10.05	10.05	8.8	19.615	9.535	-1.04065	1.82e-29	1.97e-26	JMJD6
ncbi_101113394	2.62	3.69	2.83	3.2	0.7	0.45	0.62	0.52	3.085	0.5725	-2.42992	5.56e-29	5.59e-26	EXTL1
ncbi_101113893	10.73	12.87	10.98	11.96	36.66	42.93	32.44	53.32	11.635	41.3375	1.82898	4.3e-28	4.04e-25	HIST1H1D
ncbi_101117496	4.48	4.3	4.21	4.44	11.37	10.3	9.28	11.74	4.3575	10.6725	1.29233	8.52e-28	7.5e-25	ASB4
ncbi_101118902	122.93	118.76	121.46	115.65	50.6	43.23	48.51	59.38	119.7	50.43	-1.24707	1.62e-27	1.34e-24	DYNLL1
ncbi_101121737	24.13	23.95	25.53	25.24	10.59	11.39	11.8	12.21	24.7125	11.4975	-1.10392	2.95e-27	2.31e-24	ZNF771
ncbi_101113426	5.08	4.36	6.49	4.77	27.18	17.73	21.66	18.57	5.175	21.285	2.04021	3.17e-27	2.35e-24	PRKCQ
ncbi_101104499	4.15	2	2.96	2.41	13.8	15.16	10.58	17.92	2.88	14.365	2.31842	1.55e-26	1.09e-23	FBXL4
ncbi_101122535	1.28	0.93	1.13	0.82	4.53	5.85	4.01	7.87	1.04	5.565	2.4198	4.57e-26	3.07e-23	GHDC
ncbi_101106288	11.34	11.23	13.12	12.92	33.34	32.07	35.77	29.27	12.1525	32.6125	1.42417	4.98e-26	3.19e-23	H1FX
ncbi_101117758	6.41	7.26	6.48	7.15	29.57	21.5	25.43	21.54	6.825	24.51	1.84447	7.99e-26	4.9e-23	CIRBP
ncbi_101110925	803.17	1474.28	955.35	1256.53	225.93	133.13	239.5	208.49	1122.33	201.762	-2.47577	5.29e-25	3.11e-22	Myl6b
ncbi_100125354	6.91	7.74	7.12	8.21	18.62	29.19	23.69	22.53	7.495	23.5075	1.64912	9.66e-25	5.24e-22	PLIN2
ncbi_101108206	7.16	12.38	9.38	11.56	2.7	2.36	2.39	2.57	10.12	2.505	-2.01433	9.67e-25	5.24e-22	TTC7A
ncbi_101106449	8.05	7.97	9.13	7.66	18.64	21.31	17.83	27.16	8.2025	21.235	1.37231	1.48e-23	7.72e-21	PCMTD2
ncbi_101121418	11.13	13.08	12.18	12.07	4.24	5.4	5.03	4.92	12.115	4.8975	-1.30668	3.61e-23	1.82e-20	KDELR3
ncbi_101111234	0.32	0.2	0.28	0.19	1.11	1.74	1.75	1.28	0.2475	1.47	2.57032	4.07e-23	1.98e-20	IRF4
ncbi_101114193	2.65	2.99	2.37	2.92	7.27	9.48	9.01	7.5	2.7325	8.315	1.60549	4.37e-23	2.05e-20	RASGEF1B
ncbi_101102223	10.43	12.76	14.32	13.12	28.44	35.14	33.17	31.58	12.6575	32.0825	1.34179	2.77e-22	1.26e-19	H1F0
ncbi_101110819	2.17	1.5	2.49	2.31	19.16	8.84	13.58	11.82	2.1175	13.35	2.65641	7.49e-22	3.3e-19	RBM3
ncbi_101104195	12.69	11.4	11.93	9.87	5.48	5.57	5.16	5.72	11.4725	5.4825	-1.06527	1.29e-21	5.52e-19	RAB31
ncbi_101109431	7.46	8.48	6.34	6.4	2.83	2.59	3.69	2.62	7.17	2.9325	-1.28984	3.35e-21	1.39e-18	Ankrd52
ncbi_101122306	2.49	3.1	2.12	2.86	7.03	12.93	8.85	9.69	2.6425	9.625	1.86488	4.1e-21	1.65e-18	MAST4
ncbi_105602911	1.02	1.19	1.34	0.88	3.4	6.81	6.12	4.77	1.1075	5.275	2.25186	1.13e-20	4.43e-18	OAS1
ncbi_101102585	0.21	0.22	0.3	0.43	2.07	3.73	3.47	1.7	0.29	2.7425	3.24137	2.3e-20	8.76e-18	HAS1
ncbi_101120392	5.86	21.37	15.31	12.51	0	0	0	0.08	13.7625	0.02	-9.42653	3.35e-20	1.24e-17	BoLA-DQB
ncbi_101105292	20.03	25.16	24.54	21.99	9.31	5.56	6.83	6.94	22.93	7.16	-1.6792	1.53e-19	5.53e-17	CASQ2
ncbi_101116611	10.92	9.96	11.34	9.9	3.82	4.86	4.59	3.33	10.53	4.15	-1.34332	1.81e-19	6.37e-17	PLXNA1
ncbi_101116941	18.91	13.74	16.88	17.79	39.23	50.17	34.7	58.41	16.83	45.6275	1.43887	2.09e-19	7.2e-17	LRRC2
ncbi_101120243	8.59	7.84	9.22	9.37	4.11	4.56	4.38	3.94	8.755	4.2475	-1.04349	2.22e-19	7.45e-17	LMNB2
ncbi_100147785	3.51	4.21	3.87	4.31	1.36	1.78	1.85	1.22	3.975	1.5525	-1.35636	3.52e-19	1.15e-16	SLC25A15
ncbi_101121742	7.74	2.54	3.91	5.29	18.39	36.08	24.21	29.04	4.87	26.93	2.46722	1.08e-18	3.46e-16	ARID5B
ncbi_101119787	7.98	7.07	7.53	7.96	2.71	3.63	3.7	2.87	7.635	3.2275	-1.24221	2.11e-18	6.61e-16	RET
ncbi_101104932	12.07	13.92	15.07	12.97	28.1	33.26	27.8	41.31	13.5075	32.6175	1.27189	2.71e-18	8.29e-16	UCP2
ncbi_443262	4.09	3.87	3.55	3.18	1.01	1.53	1.19	1.82	3.6725	1.3875	-1.40427	5.58e-18	1.67e-15	ARNTL
ncbi_101109808	6.26	7.43	7.92	6.41	3.03	2.95	3.58	3.24	7.005	3.2	-1.13031	1.27e-17	3.73e-15	COL12A1
ncbi_101107962	59.85	65.3	59.06	65.56	28.97	23.59	27.68	21.74	62.4425	25.495	-1.29231	1.44e-17	4.15e-15	CDC34
ncbi_101112110	5.25	6.08	6.01	5.19	1.46	1.97	2.26	2.56	5.6325	2.0625	-1.44938	1.56e-17	4.41e-15	Ttyh3
ncbi_106991367	4.08	3.94	4.71	4.53	8.37	15.88	12.04	12.37	4.315	12.165	1.4953	1.81e-17	5.01e-15	IRS2
ncbi_101109208	103.07	119.27	128.56	114.16	32.31	45.4	47.7	28.16	116.265	38.3925	-1.59852	2.1e-17	5.69e-15	SERPINH1
ncbi_101112325	0.44	1.02	0.64	0.67	3.76	6.43	3	8.74	0.6925	5.4825	2.98495	4.8e-17	1.24e-14	PPDPFL
ncbi_101118225	4.64	3.64	4.7	3.77	8.06	10.34	8.01	10.24	4.1875	9.1625	1.12965	4.83e-17	1.24e-14	MAN2C1
ncbi_101117112	18.47	20.09	20.19	17.81	41.79	74.44	67.72	49.61	19.14	58.39	1.60913	5.26e-17	1.32e-14	IFI6
ncbi_101113081	3.18	3.24	2.85	2.98	0.96	0.75	0.87	0.45	3.0625	0.7575	-2.01539	6.45e-17	1.59e-14	MTUS2
ncbi_101115200	2.68	2.35	2.3	2.63	5.65	6.08	4.5	6.63	2.49	5.715	1.19861	8.1e-17	1.97e-14	TCP11L2
ncbi_105605834	2.72	1.22	1.65	1.03	0.18	0.12	0.11	0.2	1.655	0.1525	-3.43995	8.68e-17	2.07e-14	SLC7A3
ncbi_101106412	3.99	2.79	2.93	3.82	8.62	7.65	8.89	9.36	3.3825	8.63	1.35127	1.65e-16	3.89e-14	ASL
ncbi_101120209	5.35	3.89	4.33	3.94	9.31	8.87	9.06	9.99	4.3775	9.3075	1.08829	1.96e-16	4.51e-14	UBE2D1
ncbi_101102930	1.12	0.73	1.08	0.77	2.49	3.4	2.37	4.09	0.925	3.0875	1.73891	1.98e-16	4.51e-14	Trim23
ncbi_101112122	0.53	0.75	0.78	1.04	2.43	5.17	4.1	3	0.775	3.675	2.24548	3.16e-16	7.06e-14	OAS3
ncbi_101118611	2.79	1.93	2.19	2.46	6.7	5.95	7.1	5.1	2.3425	6.2125	1.40712	5.33e-16	1.16e-13	HERC3
ncbi_100302744	74.85	110.75	80.11	107.96	34.21	21.74	30.89	33.85	93.4175	30.1725	-1.63046	5.72e-16	1.22e-13	Cib2
ncbi_101115063	3.06	3.38	3.01	2.96	5.39	7.4	6.57	7.07	3.1025	6.6075	1.09067	6.85e-16	1.44e-13	ATG13
ncbi_101117301	38.68	46.95	48.12	38.62	103.09	108.78	108.39	82.21	43.0925	100.618	1.22337	7.9e-16	1.64e-13	CEFIP
ncbi_114113045	0.07	0	0.07	0	0.89	2.06	0.88	3.03	0.035	1.715	5.61471	2.78e-15	5.6e-13	ERCC3
ncbi_100142676	1.99	0.79	2.53	2.61	7.72	14.55	7.39	14.8	1.98	11.115	2.48894	4.42e-15	8.78e-13	FBXO32
ncbi_101110594	0.96	0.86	0.85	0.84	3.05	2.23	2.21	3.43	0.8775	2.73	1.63743	5.03e-15	9.72e-13	CCNG2
ncbi_101107608	7.87	4.5	6.12	4.85	14.49	14.87	13.34	14.04	5.835	14.185	1.28156	1.63e-14	3.1e-12	KLHL38
ncbi_101105155	3.92	2.02	3.99	2.14	13.98	9.28	8.54	14.73	3.0175	11.6325	1.94674	1.66e-14	3.12e-12	BTNL9
ncbi_101119367	40.33	38.64	38.96	38.7	8.66	18.89	14.63	12.05	39.1575	13.5575	-1.5302	1.8e-14	3.33e-12	DNAJB5
ncbi_101117299	4.15	4.87	4.55	4.45	8.58	14.87	9.94	13.12	4.505	11.6275	1.36794	1.86e-14	3.41e-12	RASA4
ncbi_101107546	8.67	10.24	10.24	10.54	3.9	5.41	4.17	4.75	9.9225	4.5575	-1.12246	2.26e-14	4.03e-12	RNF166
ncbi_101118274	0.96	1.07	1.47	0.89	0.35	0.23	0.3	0.23	1.0975	0.2775	-1.98366	3.23e-14	5.69e-12	ELOVL6
ncbi_101116008	17.13	14.46	21.19	14.6	5.71	8.73	7.93	7.23	16.845	7.4	-1.18672	3.89e-14	6.77e-12	ALPK2
ncbi_101121283	15.67	15.57	12.73	15.07	7.08	8.19	6.12	6.18	14.76	6.8925	-1.09859	5.16e-14	8.86e-12	Dlgap4
ncbi_114116088	11.99	14.62	11.42	10.95	5.81	6.11	5.13	6.44	12.245	5.8725	-1.06015	5.43e-14	9.22e-12	RAET1G
ncbi_101106382	0.73	0.74	0.82	0.84	1.67	2.3	1.93	1.94	0.7825	1.96	1.32469	5.79e-14	9.6e-12	PGGHG
ncbi_101117548	0.43	0.26	0.51	0.23	0.06	0.04	0.05	0.04	0.3575	0.0475	-2.91194	5.79e-14	9.6e-12	COL11A1
ncbi_101118609	2.44	1.72	3.23	3.53	0.73	0.41	0.48	0.79	2.73	0.6025	-2.17987	6.8e-14	1.12e-11	SAMD1
ncbi_114112267	0.14	0.5	0.57	0.15	2.17	6.29	3.84	2.53	0.34	3.7075	3.44684	9.69e-14	1.57e-11	CD164
ncbi_101118099	2.21	3.04	3.15	2.41	1.04	0.64	0.68	0.83	2.7025	0.7975	-1.76074	1.01e-13	1.62e-11	MEST
ncbi_101115628	15.16	13.16	16.25	17.12	30.09	44.02	28.74	51.85	15.4225	38.675	1.32636	1.14e-13	1.81e-11	TXLNB
ncbi_101123388	31.95	37.39	32.71	35.33	17.44	16.19	18.78	15.02	34.345	16.8575	-1.02671	1.31e-13	2.05e-11	KCNJ12
ncbi_101119401	0.47	0.52	0.57	0.49	0.13	0.14	0.15	0.08	0.5125	0.125	-2.03562	1.41e-13	2.18e-11	COL22A1
ncbi_101106995	2.86	3.57	3.08	3.09	1.28	0.91	1.34	0.9	3.15	1.1075	-1.50805	1.52e-13	2.32e-11	LSS
ncbi_101121680	3.8	3.53	3.99	3.49	6.68	8.27	6.44	9.39	3.7025	7.695	1.05542	2.86e-13	4.29e-11	TRMT1
ncbi_106991683	3.92	3.4	3.64	3.7	1.44	1.6	1.97	1.94	3.665	1.7375	-1.0768	5.26e-13	7.71e-11	PHETA1
ncbi_101110707	1.95	1.47	1.71	2.1	4.84	4.01	3.89	3.67	1.8075	4.1025	1.18251	6.46e-13	9.2e-11	TMEM116
ncbi_101119104	5.09	2.56	3.68	2.65	8.96	11.17	8.75	15.01	3.495	10.9725	1.65053	7.08e-13	9.98e-11	RORC
ncbi_100302075	70.89	94.45	71.09	86.12	157.25	297.16	178.31	288.04	80.6375	230.19	1.5133	9.91e-13	1.38e-10	Rasd1
ncbi_101109989	1	0.69	1.03	0.8	2.38	2.31	2.07	3.04	0.88	2.45	1.47721	1.16e-12	1.61e-10	azo1574
ncbi_101123648	6.3	6.25	7.29	5.84	2.24	2.66	3.42	2.21	6.42	2.6325	-1.28614	1.68e-12	2.28e-10	ARHGAP23
ncbi_101116877	0.26	0.23	0.25	0.16	0.71	1.03	1.05	1.01	0.225	0.95	2.078	1.7e-12	2.28e-10	GOLGA7B
ncbi_101117523	0.34	0.31	0.38	0.33	1.07	0.95	0.79	1.31	0.34	1.03	1.59904	2.43e-12	3.17e-10	DTL
ncbi_101109397	5.53	9	5.62	8.82	19.98	30.35	16.68	29.14	7.2425	24.0375	1.73073	2.96e-12	3.82e-10	HIST1H1D
ncbi_101104393	18.57	25.49	21.68	22.22	11.06	10.63	11.74	10.45	21.99	10.97	-1.00328	3.69e-12	4.65e-10	SREBF2
ncbi_101103800	19.02	19.52	15.06	25.04	7.02	10.36	9.03	8.41	19.66	8.705	-1.17535	4.01e-12	5e-10	ROCK2
ncbi_101122936	23.61	24.2	27.96	21.93	40.69	61.66	42.12	61.08	24.425	51.3875	1.07306	5.85e-12	7.1e-10	CALCOCO1
ncbi_106991578	6.72	5.24	6.23	5.32	1.17	3.09	1.39	1.68	5.8775	1.8325	-1.68139	7.16e-12	8.62e-10	MAF
ncbi_101110686	5.57	4.64	5.26	5.41	11.1	14.07	13.66	8.9	5.22	11.9325	1.19277	7.64e-12	9.12e-10	Coro6
ncbi_101117635	2.94	1.92	2.78	2.13	6.77	5.05	6.2	5.16	2.4425	5.795	1.24645	9.5e-12	1.12e-09	EHHADH
ncbi_101111665	1.25	1.14	1.57	0.81	3.64	3.13	3.08	3.71	1.1925	3.39	1.5073	9.55e-12	1.12e-09	PGPEP1L
ncbi_101106801	10.65	11.22	12.48	10.58	6.35	5.24	5.85	4.64	11.2325	5.52	-1.02494	9.69e-12	1.13e-09	PLXND1
ncbi_101123315	3.19	2.67	4.08	2.96	8.78	7.18	8.68	6.82	3.225	7.865	1.28615	1.05e-11	1.21e-09	TMEM52
ncbi_101111037	12.24	8.72	12.23	10.84	4.69	4.48	6.24	4.64	11.0075	5.0125	-1.13488	1.16e-11	1.33e-09	FMOD
ncbi_114114097	4.79	5.01	5.03	6.01	1.71	2.46	2.16	1.46	5.21	1.9475	-1.41966	1.39e-11	1.56e-09	CRELD2
ncbi_101110964	0.39	0.83	0.59	0.6	0.03	0	0.03	0.11	0.6025	0.0425	-3.82543	1.46e-11	1.62e-09	ZNF835
ncbi_101118297	5	2.75	4.4	2.99	1.39	0.86	0.57	0.58	3.785	0.85	-2.15476	1.6e-11	1.76e-09	SLC7A10
ncbi_100307048	252.72	359.1	331.84	350.73	166.99	132.66	163.04	144.96	323.598	151.912	-1.09096	1.91e-11	2.07e-09	SPARC
ncbi_101104407	0.68	0.91	0.99	1.27	4.04	3.17	4.02	2.33	0.9625	3.39	1.81643	2.1e-11	2.24e-09	ACOT2
ncbi_101120047	2.3	2.18	2.02	2.57	0.93	1.1	1.04	0.8	2.2675	0.9675	-1.22877	2.23e-11	2.35e-09	RASGEF1A
ncbi_101116182	0.3	0.49	0.33	0.31	1.11	1.16	1.14	1.84	0.3575	1.3125	1.8763	2.87e-11	2.95e-09	SLC38A3
ncbi_101107094	6.52	7.73	6.98	8.31	24.49	15.19	19.85	16.85	7.385	19.095	1.37053	2.89e-11	2.95e-09	ARRDC3
ncbi_101123553	9.95	12.21	10.56	11.81	4.59	5.04	6.01	3.84	11.1325	4.87	-1.19278	3.32e-11	3.34e-09	P4HA2
ncbi_101113217	10.84	10.78	11.11	10.56	21.25	39.2	38.19	21.18	10.8225	29.955	1.46876	4.24e-11	4.12e-09	HLA-A
ncbi_101108754	1.78	1.96	1.27	1.46	4.24	3.77	4.07	5.48	1.6175	4.39	1.44046	4.37e-11	4.19e-09	GALK2
ncbi_101111398	0.44	0.65	0.35	0.56	1.8	1.5	1.47	2.08	0.5	1.7125	1.7761	4.6e-11	4.38e-09	PHF7
ncbi_101115102	0.81	0.96	1.03	0.87	2.04	1.93	2.26	1.8	0.9175	2.0075	1.12962	5.47e-11	5.14e-09	STK11IP
ncbi_101120326	14.04	28.94	26.96	12.95	2.15	1.88	2.98	0.7	20.7225	1.9275	-3.4264	5.86e-11	5.43e-09	TUBA1B
ncbi_654334	2.61	3.52	3.02	3.68	1.28	1.61	1.45	1.38	3.2075	1.43	-1.16543	6.06e-11	5.55e-09	SLCO2A1
ncbi_101112629	3.11	2.16	2.36	2.06	1.18	0.72	1.07	0.88	2.4225	0.9625	-1.33164	6.83e-11	6.17e-09	PTPN4
ncbi_101108786	4.33	2.93	3.35	3.56	1.12	1.94	1.51	1.79	3.5425	1.59	-1.15574	6.94e-11	6.23e-09	CHORDC1
MSTRG.16899	1.85	2.53	1.45	3.44	7.5	6.54	6.2	10.39	2.3175	7.6575	1.7243	7.27e-11	6.46e-09	Ppp2r2d
ncbi_101122940	2.16	3.13	2.72	1.51	5.37	6.15	8.63	7.58	2.38	6.9325	1.54241	7.36e-11	6.48e-09	A2M
ncbi_101111187	0.94	0.74	0.69	0.52	2.19	2.13	2.09	1.88	0.7225	2.0725	1.5203	7.41e-11	6.49e-09	STEAP4
ncbi_101112844	742.12	653.06	617.56	584.73	294.05	369.69	364.76	259.11	649.367	321.902	-1.01241	7.82e-11	6.8e-09	HSPA8
ncbi_654403	355.03	456.12	346.72	455.51	709.08	953.04	783.41	814.31	403.345	814.96	1.01471	8.07e-11	6.93e-09	TXNIP
ncbi_101118136	1.79	2.26	1.9	1.83	0.85	0.84	0.89	0.69	1.945	0.8175	-1.25048	8.46e-11	7.23e-09	ASPHD2
ncbi_101109471	5.41	4.35	5.97	4.84	2.87	2.28	2.52	2.42	5.1425	2.5225	-1.02762	9.68e-11	8.17e-09	Ccdc3
ncbi_101116336	12.44	13.78	17.65	11.41	34.33	26.11	36.53	28.9	13.82	31.4675	1.1871	9.96e-11	8.36e-09	CES1
ncbi_443117	23.52	22.54	28.02	26.14	60.13	79.03	98.91	43.76	25.055	70.4575	1.49165	1.04e-10	8.65e-09	JUNB
ncbi_101118525	5.8	7.71	7.46	6.47	2.83	3.93	3.28	2.89	6.86	3.2325	-1.08556	1.33e-10	1.1e-08	TLE2
ncbi_101109586	1.34	1.21	1.34	1.64	0.47	0.49	0.22	0.56	1.3825	0.435	-1.66819	1.64e-10	1.33e-08	GALNT17
ncbi_100125616	0.87	0.9	1.08	0.56	0.02	0	0.07	0.02	0.8525	0.0275	-4.9542	1.76e-10	1.42e-08	TNMD
ncbi_101105114	3.46	7.95	11.46	2.17	45.73	79.96	48.03	83.21	6.26	64.2325	3.35907	1.87e-10	1.5e-08	CYP4B1
ncbi_101118777	0.21	0.13	0.24	0.2	0.45	0.62	0.5	0.52	0.195	0.5225	1.42196	1.89e-10	1.5e-08	ZC3H6
ncbi_101115230	32.34	23.48	26.93	24.05	41.33	72.73	56.93	54.78	26.7	56.4425	1.07994	2.27e-10	1.8e-08	ubq-1
ncbi_101114420	0.03	0.04	0.03	0.1	0.27	0.56	0.46	0.21	0.05	0.375	2.90689	2.29e-10	1.8e-08	TFCP2L1
ncbi_101115127	2.57	2.69	2.64	2.65	1.28	0.93	1.06	1.48	2.6375	1.1875	-1.15124	2.56e-10	2e-08	RDH11
ncbi_101119618	0.51	0.41	0.66	0.79	1.46	1.68	1.64	2.05	0.5925	1.7075	1.527	2.73e-10	2.13e-08	TCEAL1
ncbi_101122152	3.31	6.31	3.76	6.09	1.49	1.46	1.12	1.97	4.8675	1.51	-1.68863	3.11e-10	2.39e-08	NANOS1
ncbi_101119609	1.1	0.51	1.3	0.84	2.02	3.06	2.04	3.09	0.9375	2.5525	1.44502	3.26e-10	2.49e-08	FAM13C
ncbi_101109533	1.84	1.11	1.63	0.96	0.42	0.48	0.41	0.72	1.385	0.5075	-1.44841	4.04e-10	3.06e-08	KIAA1549
ncbi_101117960	13.09	13.01	13.73	11.18	31.02	20.61	29.46	25.35	12.7525	26.61	1.06119	4.06e-10	3.06e-08	ART5
ncbi_100169699	5.33	9.72	7.86	8.21	16.98	21.07	15.17	23.83	7.78	19.2625	1.30795	4.64e-10	3.48e-08	LIPE
ncbi_101105089	0.23	0.1	0.13	0.18	0.62	0.92	0.71	1.22	0.16	0.8675	2.43879	5.14e-10	3.84e-08	FMO1
ncbi_101121849	3.22	5.97	4.83	3.86	10.27	14.43	9.02	17.21	4.47	12.7325	1.51017	5.34e-10	3.96e-08	Tmem140
ncbi_101108614	0.8	0.95	0.96	0.83	0.48	0.35	0.42	0.34	0.885	0.3975	-1.15472	6.01e-10	4.43e-08	TENM4
ncbi_101115290	0.91	0.56	0.82	0.38	2.43	2.08	2.18	2.19	0.6675	2.22	1.73372	6.54e-10	4.8e-08	CCL16
ncbi_101123304	6.28	4.94	4.58	5.44	10.72	10.16	8.2	13.91	5.31	10.7475	1.01722	6.69e-10	4.89e-08	DAPK3
ncbi_101104092	1.13	0.63	1.03	1.04	2.04	2.02	1.85	2.3	0.9575	2.0525	1.10004	8.35e-10	5.98e-08	TTC33
ncbi_105607012	0.06	0.02	0.07	0.09	0.52	0.95	0.58	1.57	0.06	0.905	3.91488	1.01e-09	7.04e-08	--
ncbi_443535	6.2	8.4	8.54	7.99	3.69	1.54	2.93	2.89	7.7825	2.7625	-1.49426	1.09e-09	7.55e-08	LDLR
ncbi_443186	1.48	3.42	3.21	1.08	0.24	0.24	0.21	0.06	2.2975	0.1875	-3.6151	1.17e-09	7.99e-08	ACACA
ncbi_101104340	7.63	23.92	10.22	24.8	1.62	2.52	3.02	1.84	16.6425	2.25	-2.88688	1.36e-09	9.13e-08	RELT
ncbi_101109448	57.06	61.07	50.35	60.2	149.7	95.29	99.19	151.54	57.17	123.93	1.1162	1.38e-09	9.22e-08	DDIT4L
ncbi_101105177	0.1	0.06	0.13	0.05	1.08	0.36	0.46	0.96	0.085	0.715	3.07241	1.45e-09	9.66e-08	TGM3
ncbi_101120892	1.89	2.17	2.35	2.55	4.74	5.26	5.21	4.52	2.24	4.9325	1.13882	1.57e-09	1.04e-07	HMGB2
ncbi_101123431	3.79	5.06	3.22	5.64	1.17	2.5	1.61	1.31	4.4275	1.6475	-1.42621	1.63e-09	1.07e-07	ABCC5
ncbi_101121007	1.32	0.99	1.08	1.01	2.26	2.37	2.65	1.93	1.1	2.3025	1.0657	1.69e-09	1.1e-07	ARHGEF37
ncbi_101109381	7.73	10.81	11.95	10.14	17.3	27.75	18.85	29.92	10.1575	23.455	1.20735	1.72e-09	1.12e-07	TBC1D17
ncbi_101106877	3.54	1.36	1.85	2.47	0.08	0.59	0.4	0.12	2.305	0.2975	-2.95381	1.74e-09	1.12e-07	CHRDL2
ncbi_101108030	1.29	1.48	1	0.98	0.12	0.25	0.11	0.16	1.1875	0.16	-2.89178	1.85e-09	1.19e-07	AMZ2
ncbi_101111284	17.18	31.29	23.6	24.75	11.42	11.09	11.15	10.52	24.205	11.045	-1.13191	1.88e-09	1.2e-07	CCDC69
ncbi_101122001	0.98	0.44	0.67	0.77	1.95	2.67	1.7	2.35	0.715	2.1675	1.60002	2.02e-09	1.28e-07	NOSTRIN
ncbi_101114717	1.24	1.47	1.76	1.33	0.39	0.49	0.74	0.29	1.45	0.4775	-1.60248	2.24e-09	1.4e-07	PLEKHA6
ncbi_101110290	4.46	3.2	4.29	3.75	1.6	2.38	2.02	1.6	3.925	1.9	-1.04669	2.3e-09	1.43e-07	MRAS
ncbi_101106077	5.39	5.79	7.09	5.21	3.18	2.46	3.27	2.82	5.87	2.9325	-1.00123	2.33e-09	1.44e-07	PCDH12
ncbi_101110796	2.02	1.29	1.97	1.49	0.72	0.26	0.48	0.27	1.6925	0.4325	-1.96838	2.58e-09	1.58e-07	LRRN1
ncbi_101109633	2.05	1.66	2.02	1.56	5.82	4.3	5.2	3.67	1.8225	4.7475	1.38125	2.69e-09	1.63e-07	AKR1C3
ncbi_101109670	2.12	3.2	2.2	3.23	1.1	1.11	1.32	1.15	2.6875	1.17	-1.19976	4.18e-09	2.46e-07	Uck2
ncbi_101103837	5.88	9	5.96	9.73	2.29	3.38	3.39	1.81	7.6425	2.7175	-1.49176	4.85e-09	2.8e-07	ABTB2
ncbi_101122324	3.6	2.36	2.52	3.08	5.97	5.79	5.08	6.76	2.89	5.9	1.02965	4.94e-09	2.84e-07	ADK
ncbi_101102869	0.22	0.17	0.3	0.27	0.59	0.91	0.69	1.19	0.24	0.845	1.81592	5.65e-09	3.23e-07	Pgbd5
ncbi_101105592	36.64	48.34	49.91	41.19	20.05	18.22	22.59	11.44	44.02	18.075	-1.28416	6.15e-09	3.51e-07	Jph2
ncbi_101111443	18.17	11.16	13	18.02	37.56	30.59	39.3	27.03	15.0875	33.62	1.15597	7.01e-09	3.97e-07	APOLD1
ncbi_101116953	0	0	0	0	0.17	1.32	0.59	0.29	0.001	0.5925	9.21067	7.01e-09	3.97e-07	AMDHD2
ncbi_101118468	1.08	1.39	1.27	0.98	2.3	2.31	2.56	2.85	1.18	2.505	1.08602	8.19e-09	4.55e-07	BBS2
ncbi_101116585	16.17	30.25	25.16	31.86	10.13	12.34	11.79	11.15	25.86	11.3525	-1.18771	9.67e-09	5.3e-07	ANKRD10
ncbi_114108759	0	0	0	0.06	1.75	0.76	1.91	0.54	0.015	1.24	6.36923	9.92e-09	5.42e-07	IFI6
ncbi_101116575	0.97	1.35	0.82	1.95	3.01	3.94	3.62	4.49	1.2725	3.765	1.56498	1.02e-08	5.54e-07	Bst1
ncbi_101109328	2.27	2.77	2.69	3.2	0.49	0.86	0.09	0.74	2.7325	0.545	-2.32589	1.1e-08	5.91e-07	SIM2
ncbi_101105501	1.78	2.2	2.13	2.4	3.58	4.96	4.07	6.76	2.1275	4.8425	1.18659	1.22e-08	6.55e-07	LNX1
ncbi_100170113	11.67	2.66	7.9	6.88	1.3	1.66	0.87	2.84	7.2775	1.6675	-2.12576	1.24e-08	6.61e-07	CYP1A1
ncbi_101114824	2.8	2.85	2.42	2.94	4.03	6.25	5.3	6.55	2.7525	5.5325	1.00719	1.35e-08	7.16e-07	GNL2
ncbi_114108712	0.7	0.84	0.85	0.49	1.3	3.05	2.35	1.48	0.72	2.045	1.50603	1.39e-08	7.35e-07	OAS1
ncbi_101106812	3.44	1.94	2.54	2.39	5.24	5.34	3.96	6.63	2.5775	5.2925	1.03798	1.67e-08	8.64e-07	ST3GAL6
ncbi_100037690	0.54	0.95	1.18	0.34	0.05	0.05	0	0.17	0.7525	0.0675	-3.47873	1.74e-08	8.96e-07	PCK1
ncbi_101102276	2.07	1.8	2.14	2.19	4.43	4.23	3.82	6.43	2.05	4.7275	1.20545	1.9e-08	9.7e-07	PMF1
ncbi_101119811	0.14	0.07	0.14	0.16	0.63	0.36	0.44	0.35	0.1275	0.445	1.80331	2.13e-08	1.08e-06	CFAP54
ncbi_443434	2.79	4.49	3.31	4.99	8.22	8.02	9.83	8.63	3.895	8.675	1.15524	2.59e-08	1.29e-06	CPT1A
ncbi_101115012	6.66	8.79	8.76	6.42	15.47	13.41	18.46	14.66	7.6575	15.5	1.01732	3.05e-08	1.49e-06	ASS1
ncbi_101119220	0.86	1.06	0.95	0.93	1.63	2.09	1.81	3	0.95	2.1325	1.16655	3.2e-08	1.56e-06	ATG14
ncbi_101119737	0.17	0.21	0.43	0.44	0.83	1.59	1.24	0.89	0.3125	1.1375	1.86394	3.73e-08	1.79e-06	NPTX1
MSTRG.5006	0.77	1.12	0.92	1.58	0.47	0.27	0.4	0.3	1.0975	0.36	-1.60815	4.06e-08	1.93e-06	--
ncbi_101114835	0.76	0.67	1	0.53	1.63	1.76	1.64	2.61	0.74	1.91	1.36798	4.25e-08	2.02e-06	HSPBAP1
ncbi_443133	7.1	7.74	9.4	6.7	2.17	1.53	4.3	1.45	7.735	2.3625	-1.71109	4.64e-08	2.18e-06	IGFBP5
ncbi_101105893	1.87	1.68	1.61	2.3	4.17	3.6	3.36	5.61	1.865	4.185	1.16605	4.8e-08	2.25e-06	Cir1
ncbi_780441	0.31	0.32	0.64	0.33	0.91	3.07	2.52	1.01	0.4	1.8775	2.23074	6.23e-08	2.84e-06	MX2
ncbi_101115498	0.74	0.5	0.7	0.51	1.74	1.38	1.43	1.51	0.6125	1.515	1.30654	6.45e-08	2.92e-06	AS3MT
ncbi_101119324	3.02	1.94	2.55	1.55	5.23	5.47	6.78	3.17	2.265	5.1625	1.18856	6.63e-08	2.97e-06	PFKFB2
ncbi_101113458	0.67	1.17	1.28	0.88	1.9	4.23	2.03	5.19	1	3.3375	1.73877	6.64e-08	2.97e-06	GALNT15
ncbi_101106058	1	0.85	0.99	0.82	1.83	1.99	1.98	1.8	0.915	1.9	1.05416	6.76e-08	3.01e-06	SP110
ncbi_114109001	0.88	0.36	0.83	1.56	3.57	3.59	2.25	5	0.9075	3.6025	1.98903	6.96e-08	3.08e-06	NGRN
ncbi_101112936	0.69	0.57	0.65	0.77	1.51	1.54	1.35	1.74	0.67	1.535	1.19601	7.74e-08	3.38e-06	IFI16
ncbi_101110839	0.28	0.47	0.44	0.52	0.11	0.08	0.15	0.18	0.4275	0.13	-1.71741	8.23e-08	3.58e-06	KCTD16
ncbi_101105016	6.47	5.04	7.21	6.04	8.2	20.8	11.37	17.52	6.19	14.4725	1.2253	8.55e-08	3.71e-06	KIAA1217
ncbi_101106132	1.8	1.65	1.74	1.42	0.92	0.77	0.76	0.72	1.6525	0.7925	-1.06017	8.83e-08	3.82e-06	Sox8
ncbi_100125351	2.64	2.06	2.56	2.07	1.31	1.03	0.93	0.84	2.3325	1.0275	-1.18274	1.07e-07	4.55e-06	SQLE
ncbi_101113931	2.01	2.81	2.97	4.14	0.92	1.29	1.39	1.17	2.9825	1.1925	-1.32253	1.1e-07	4.62e-06	NR2F6
ncbi_443259	3.22	3.13	2.62	3.92	4.86	11.83	9.45	6.65	3.2225	8.1975	1.347	1.2e-07	5e-06	PER2
ncbi_101118216	6.94	1.91	7.74	2.37	16.46	16.39	16.15	16.71	4.74	16.4275	1.79315	1.57e-07	6.36e-06	ART5
ncbi_101121464	0.56	0.4	0.54	0.3	0.03	0.07	0.11	0.02	0.45	0.0575	-2.96829	1.6e-07	6.44e-06	ADGRF1
ncbi_101113319	0.2	1.46	0.83	0.73	0.06	0.07	0.18	0.11	0.805	0.105	-2.9386	1.64e-07	6.57e-06	Krt80
ncbi_101113354	29.93	45.37	17.34	23.48	11.02	11.19	11.66	9.31	29.03	10.795	-1.42718	1.71e-07	6.84e-06	RTN2
ncbi_114115243	1.07	1.39	1.03	1.36	0.47	0.72	0.58	0.49	1.2125	0.565	-1.10166	1.94e-07	7.59e-06	SLC4A4
ncbi_101114872	5.03	3.91	3.91	3.83	0.56	2.05	1.38	0.59	4.17	1.145	-1.8647	1.96e-07	7.65e-06	CHAC1
ncbi_101110084	0.74	0.59	1.29	0.62	1.8	2.21	1.9	1.49	0.81	1.85	1.19153	2.03e-07	7.84e-06	TRPM4
ncbi_114117545	0.4	0.29	0.49	0.36	0.95	0.73	0.91	0.83	0.385	0.855	1.15107	2.2e-07	8.44e-06	SPTLC3
ncbi_101121414	2.35	2.7	2.62	1.78	1.07	1.01	0.99	0.51	2.3625	0.895	-1.40035	2.23e-07	8.52e-06	APOL3
ncbi_101123490	1.27	0.9	1.87	1.57	2.82	4.02	3.19	3.19	1.4025	3.305	1.23665	2.34e-07	8.83e-06	BBC3
ncbi_101110341	0.45	0.27	0.21	0.26	0.76	1.04	1.05	0.59	0.2975	0.86	1.53145	2.43e-07	9.16e-06	HAS2
MSTRG.5042	3.6	4.07	5.14	4.62	1.31	0.69	0.86	1.89	4.3575	1.1875	-1.87557	2.45e-07	9.21e-06	Ralbp1
ncbi_101107254	2.34	2.97	2.72	2.34	3.78	7.41	4.56	5.55	2.5925	5.325	1.03844	2.51e-07	9.42e-06	PCNT
ncbi_101106450	1.21	1.85	1.35	1.91	3.06	3.21	3.73	3.1	1.58	3.275	1.05157	2.63e-07	9.72e-06	LPIN3
ncbi_101102194	0.44	0.49	0.57	0.37	1.4	1.04	1.59	0.92	0.4675	1.2375	1.40439	2.66e-07	9.81e-06	IFIT1
MSTRG.16891	23.98	13.82	22.95	14.43	8.36	8.23	6.6	12.1	18.795	8.8225	-1.09109	2.96e-07	1.09e-05	CCT6A
ncbi_101103031	6.87	4.62	6.53	6.07	3.54	2.44	3.23	2.11	6.0225	2.83	-1.08956	3.03e-07	1.11e-05	AK4
ncbi_101117785	1.07	1.11	1.68	1	3.3	3.26	2.28	3.05	1.215	2.9725	1.29072	3.15e-07	1.14e-05	APOA1
ncbi_101104900	4.67	1.2	1.19	5	0.38	0.78	0.49	0.76	3.015	0.6025	-2.32312	3.28e-07	1.18e-05	GDF11
ncbi_101112041	1.19	0.85	0.53	0.77	2.42	2.32	2.38	1.55	0.835	2.1675	1.37618	3.32e-07	1.19e-05	MEIS1
ncbi_101122042	2.1	3.36	3.03	2.71	1.03	0.96	1.71	1.01	2.8	1.1775	-1.2497	3.4e-07	1.22e-05	Gpr153
ncbi_101120418	0.36	0.39	0.72	0.33	0.14	0.06	0.05	0.1	0.45	0.0875	-2.36257	3.55e-07	1.27e-05	WISP1
ncbi_105614854	24.38	19.33	14.15	17.78	11.13	9.61	8	7.39	18.91	9.0325	-1.06595	3.64e-07	1.29e-05	calm
ncbi_105603910	0.64	1.61	0.98	0.68	2.04	3.94	3.27	3.31	0.9775	3.14	1.6836	4.08e-07	1.44e-05	MYLK4
ncbi_443090	13.31	8.32	13.3	9.61	18.62	37.55	16.2	45.8	11.135	29.5425	1.40769	4.1e-07	1.44e-05	GPD2
ncbi_101107342	0.99	1.03	2.39	1.17	0.24	0.6	0.48	0.39	1.395	0.4275	-1.70627	4.31e-07	1.49e-05	CILP2
ncbi_101113622	29.37	34.88	21.9	37.87	9.98	1.86	4.5	6.32	31.005	5.665	-2.45235	4.41e-07	1.51e-05	SCN4B
ncbi_114117952	0.67	0.99	0.67	0.57	0.17	0.3	0.14	0.28	0.725	0.2225	-1.70418	4.64e-07	1.57e-05	ZNF835
ncbi_101104991	0.49	0.82	0.6	0.8	0.3	0.18	0.2	0.37	0.6775	0.2625	-1.3679	4.68e-07	1.58e-05	FBN2
ncbi_101109979	5.34	2.67	3.9	5.18	7.87	11.57	12.57	7.74	4.2725	9.9375	1.2178	4.86e-07	1.63e-05	GEM
ncbi_101106898	10.24	16.19	11.44	16.82	6.74	4.69	7.74	5.56	13.6725	6.1825	-1.14501	5.07e-07	1.69e-05	POPDC2
ncbi_114117877	4.33	2.75	2.88	4.24	7.57	7.95	8.91	5.7	3.55	7.5325	1.08531	5.79e-07	1.89e-05	Ces1d
ncbi_101117883	0.17	0.38	0.27	0.52	0.87	2.86	0.71	3.36	0.335	1.95	2.54124	5.82e-07	1.89e-05	CFAP100
ncbi_101118310	0.18	0.02	0.08	0.08	0.45	0.35	0.45	0.52	0.09	0.4425	2.29768	6.02e-07	1.94e-05	MYRIP
ncbi_101122329	1.51	0.5	0.43	1.07	0	0.12	0.12	0.18	0.8775	0.105	-3.06301	6.04e-07	1.95e-05	MAGED4
ncbi_101103503	0.53	0.39	1.15	0.27	1.69	2.85	1.33	2.47	0.585	2.085	1.83354	6.46e-07	2.07e-05	AMPD3
ncbi_101111567	2.03	2.33	1.74	1.43	3.61	3.97	4.15	3.87	1.8825	3.9	1.05082	7.31e-07	2.3e-05	AGTRAP
ncbi_101105627	3.36	3.1	2.31	4.44	6.69	8.66	9.63	5.81	3.3025	7.6975	1.22083	7.52e-07	2.36e-05	PBLD
ncbi_100034669	0.39	0.38	0.36	0.76	1.13	1.54	1.88	2.05	0.4725	1.65	1.80408	7.58e-07	2.37e-05	TAC1
ncbi_101116189	1.28	0.15	0.26	0.72	3.97	3.83	2.54	2.47	0.6025	3.2025	2.41017	7.65e-07	2.39e-05	BCCIP
ncbi_101103510	0.28	0.23	0.37	0.23	0.66	0.65	0.53	0.81	0.2775	0.6625	1.25543	7.84e-07	2.43e-05	FANCI
ncbi_101109216	4.54	2.44	5.38	2.49	6.04	10.7	7.94	10.85	3.7125	8.8825	1.25857	8.15e-07	2.52e-05	FAH
ncbi_101107621	52.68	90.47	51.58	101.8	162.63	465.09	216.73	394.99	74.1325	309.86	2.06344	9.01e-07	2.74e-05	PFKFB3
ncbi_114110487	11.35	15.68	11.52	14.83	5.95	2.65	6.67	5.84	13.345	5.2775	-1.33837	9.12e-07	2.76e-05	Glrx5
ncbi_443185	14.01	20	19.9	14.75	9.62	5.32	9.41	6.65	17.165	7.75	-1.1472	9.35e-07	2.83e-05	SCD
ncbi_101122213	10.86	9.37	13.66	9.19	5.86	4.58	6.47	3.61	10.77	5.13	-1.06999	9.56e-07	2.88e-05	MMP15
ncbi_101111414	2.49	3.72	3.05	4.23	5.17	7.76	7.41	6.96	3.3725	6.825	1.01701	1.14e-06	3.38e-05	SMAD7
ncbi_101118294	1.59	1.17	1.64	0.97	2.28	2.98	3.15	2.35	1.3425	2.69	1.00268	1.24e-06	3.62e-05	PLA2G15
ncbi_101104842	0.28	0.14	0.14	0.05	0.6	0.65	0.61	0.88	0.1525	0.685	2.16729	1.28e-06	3.72e-05	FMO2
ncbi_101113882	7.09	9.37	7.56	10.79	2.79	5.57	4.38	3.24	8.7025	3.995	-1.12323	1.31e-06	3.76e-05	CREB3L1
ncbi_101106107	3.55	1.87	3.12	2.76	1.43	1.39	1	1.68	2.825	1.375	-1.03882	1.33e-06	3.82e-05	Zc3h12c
ncbi_443447	6.48	9.21	6.33	9.6	11.69	27.11	19.44	16.24	7.905	18.62	1.23602	1.35e-06	3.88e-05	MYC
ncbi_101123478	4.18	2.34	4.62	2.27	7.49	7.08	7.92	6.36	3.3525	7.2125	1.10526	1.42e-06	4.06e-05	HID1
ncbi_114112166	1.61	1.17	1.41	1.38	2.65	5.73	6.01	2.72	1.3925	4.2775	1.61909	1.47e-06	4.17e-05	Bloc1s2
ncbi_101111722	2.88	5.27	3.58	5.93	7.06	14.7	12.08	10.73	4.415	11.1425	1.33559	1.62e-06	4.54e-05	CXCL16
ncbi_101122203	0.71	0.32	1.17	0.53	1.79	3.35	2	2.55	0.6825	2.4225	1.8276	1.67e-06	4.68e-05	Armc7
ncbi_101122252	0.87	0.37	0.69	0.73	0.29	0.19	0.22	0.34	0.665	0.26	-1.35484	1.73e-06	4.82e-05	CERS6
ncbi_114114906	51.3	70.39	61.71	72.67	8.97	35.72	17.31	31.46	64.0175	23.365	-1.45412	1.79e-06	4.96e-05	CALR
ncbi_101122401	4.8	6.52	5.36	5.24	1.6	2.68	3.68	2.22	5.48	2.545	-1.10651	1.83e-06	5.05e-05	ADCY9
ncbi_101104057	0.08	0.04	0.09	0.04	0.33	0.25	0.35	0.32	0.0625	0.3125	2.32193	2.05e-06	5.57e-05	ATP6V0A4
ncbi_101115232	0.74	1.07	0.84	0.99	2.56	1.39	2.52	2.25	0.91	2.18	1.26039	2.1e-06	5.66e-05	PIK3IP1
ncbi_114118429	9.97	11.89	12.78	8.34	18.37	27.54	17.09	25.8	10.745	22.2	1.04689	2.1e-06	5.66e-05	ART1
ncbi_106991336	13.86	7.12	9.75	6.16	4.16	4.12	4.21	2.69	9.2225	3.795	-1.28106	2.13e-06	5.71e-05	Mafa
ncbi_101106263	1.3	0.89	1.16	1.14	0.63	0.36	0.56	0.29	1.1225	0.46	-1.28701	2.17e-06	5.81e-05	SHROOM3
ncbi_101121551	7.01	11.54	9.11	10.71	5.81	2.93	4.6	3.64	9.5925	4.245	-1.17614	2.18e-06	5.81e-05	DNAJA4
MSTRG.15432	1.03	1.98	1.13	2.12	7.19	3.25	2.74	9.5	1.565	5.67	1.85719	2.18e-06	5.81e-05	--
ncbi_105603239	1.47	1.4	1.55	1.71	0.78	0.35	0.41	0.86	1.5325	0.6	-1.35285	2.27e-06	6.01e-05	C14orf132
ncbi_101105033	1.33	2.28	2.03	1.98	0.84	0.83	0.87	1.18	1.905	0.93	-1.03449	2.3e-06	6.06e-05	SLC6A6
ncbi_443218	90.31	34.48	86.18	43.73	260.15	319.57	415.24	117.87	63.675	278.207	2.12736	2.37e-06	6.25e-05	FOS
ncbi_443534	0.14	0.19	0.58	0.23	0	0	0.03	0.04	0.285	0.0175	-4.02554	2.51e-06	6.58e-05	LEP
ncbi_101116742	0.64	0.65	0.71	0.57	0.23	0.3	0.36	0.22	0.6425	0.2775	-1.21121	2.52e-06	6.59e-05	TLCD2
ncbi_101112949	1.22	0.49	0.66	1.1	1.98	2.32	2.09	1.84	0.8675	2.0575	1.24596	2.66e-06	6.9e-05	STC1
ncbi_101103683	0.36	0.6	0.73	0.43	1.16	1.92	1.5	1.29	0.53	1.4675	1.4693	2.7e-06	6.99e-05	IRF7
ncbi_101113579	0.51	0.37	0.54	0.39	0.18	0.1	0.17	0.15	0.4525	0.15	-1.59296	2.74e-06	7.03e-05	CALCR
ncbi_101111728	3.56	2.12	3.54	2.71	1.49	1.64	1.48	1.27	2.9825	1.47	-1.02071	2.77e-06	7.1e-05	TMEM51
ncbi_101118894	2.33	0.69	1.38	3.3	6.93	4.95	6.37	6.19	1.925	6.11	1.66631	2.83e-06	7.22e-05	ZNF329
ncbi_101108197	50.83	81.93	72.81	73	20.79	41.97	36.87	39.61	69.6425	34.81	-1.00047	2.94e-06	7.49e-05	NBL1
ncbi_114108606	0.82	0.5	1.03	0.55	0.24	0.13	0.2	0.26	0.725	0.2075	-1.80487	3e-06	7.58e-05	SLC2A5
ncbi_101110160	12	11.08	14.88	14.44	16.79	35.66	18.35	36.63	13.1	26.8575	1.03576	3.11e-06	7.82e-05	RSC1A1
ncbi_101122407	0.62	0.52	0.74	0.45	2.16	2.21	2.95	0.67	0.5825	1.9975	1.77787	3.13e-06	7.85e-05	EGR2
ncbi_101109057	56.88	99.07	68.61	95.77	45.15	31.5	31.48	49.28	80.0825	39.3525	-1.02503	3.14e-06	7.88e-05	ANKRD2
ncbi_101103501	0.31	0.27	0.3	0.33	0.07	0.06	0.11	0.06	0.3025	0.075	-2.01197	3.27e-06	8.14e-05	Grik5
ncbi_101121244	0.55	0.7	0.39	0.77	1.54	1.26	1.46	1.48	0.6025	1.435	1.25202	3.32e-06	8.24e-05	SP140L
ncbi_101113252	3.47	1.43	1.75	2.83	1.25	0.52	0.9	0.69	2.37	0.84	-1.49643	3.4e-06	8.42e-05	MYH3
ncbi_101108327	9.01	7.37	9.58	6.88	4.39	3.35	4.87	2.18	8.21	3.6975	-1.15083	3.94e-06	9.66e-05	SAMD11
ncbi_106990117	1.81	0.95	1.69	0.93	2.88	2.84	3.23	2.98	1.345	2.9825	1.14892	3.97e-06	9.72e-05	HLA-B
ncbi_100381267	9.91	14.97	13	15.55	25.9	29.96	32.49	19.21	13.3575	26.89	1.00942	4.18e-06	0.000101837	SERPINE1
ncbi_101109291	0.58	0.58	0.81	0.56	0.16	0.17	0.32	0.33	0.6325	0.245	-1.36828	4.24e-06	0.000103001	PKP1
ncbi_101120039	9.3	8.17	8.42	9.03	2.67	5.01	1.96	5.75	8.73	3.8475	-1.18206	4.37e-06	0.000105517	DPH3
ncbi_101112675	1.64	0.95	1.34	1.26	1.92	3.89	3.69	2.24	1.2975	2.935	1.17763	4.49e-06	0.00010764	RAI14
ncbi_101118915	1.2	0.75	0.78	1.15	1.81	2.21	1.42	2.73	0.97	2.0425	1.07428	5.06e-06	0.000119963	ACAD11
ncbi_101120986	1.91	1.29	1.24	1.35	3.53	2.11	4	4.07	1.4475	3.4275	1.24359	5.09e-06	0.000120507	GALT
ncbi_101122463	0.55	0.99	0.93	0.71	2.25	2.14	2.03	2.44	0.795	2.215	1.47828	5.25e-06	0.000123627	SELENOH
ncbi_101114816	16.5	22.28	18.82	23.52	31.61	64.57	26.74	67.56	20.28	47.62	1.23151	5.38e-06	0.000126036	ACACB
ncbi_443058	1.65	1.3	0.69	0.53	0.34	0.19	0.16	0.09	1.0425	0.195	-2.4185	5.59e-06	0.000130364	SPP1
ncbi_101115044	29.89	14.02	26.34	17.2	65.04	35.99	42.35	47.22	21.8625	47.65	1.12402	5.78e-06	0.000134681	CCL14
MSTRG.8153	49.87	137.91	73.06	127.4	202.58	230.84	215.61	345.57	97.06	248.65	1.35717	5.98e-06	0.000138752	EEF2
MSTRG.4689	4.01	4.48	4.08	3.3	2.07	0.98	1.73	1.95	3.9675	1.6825	-1.23762	6.11e-06	0.000141701	MGST1
ncbi_101120639	0.45	0.35	0.51	0.32	0.77	1.23	1.33	0.88	0.4075	1.0525	1.36895	7.18e-06	0.000164803	SLC46A2
ncbi_101104854	2.93	3.14	2.95	4.26	1.46	1.97	1.42	1.75	3.32	1.65	-1.00872	7.38e-06	0.000168198	CCDC84
ncbi_443158	18.21	20.54	24.87	18.93	10.64	4.85	12.07	5.83	20.6375	8.3475	-1.30585	7.87e-06	0.000177712	MYOG
ncbi_101113133	1.6	1.63	2.09	1.68	1.03	0.69	0.98	0.68	1.75	0.845	-1.05033	8.26e-06	0.000185098	HABP4
ncbi_101115013	0.26	0.13	0.13	0.45	0.74	0.83	1.05	1.15	0.2425	0.9425	1.95851	8.41e-06	0.000186869	RSAD2
ncbi_101112127	0.22	0.22	0.13	0.12	0.34	0.61	0.4	0.85	0.1725	0.55	1.67284	8.42e-06	0.000186964	VWA3B
ncbi_101117959	1.61	1.8	3.84	1.46	4.32	5.24	6.08	5.46	2.1775	5.275	1.2765	8.69e-06	0.000191381	ZNF784
ncbi_101123651	0.38	0.26	0.33	0.24	0.65	0.76	0.72	0.74	0.3025	0.7175	1.24604	9.41e-06	0.000204086	2022-03-01
ncbi_100125623	0.48	0.51	0.44	0.6	1.06	1.5	1.28	0.71	0.5075	1.1375	1.16439	9.6e-06	0.000207448	PER3
ncbi_101111294	0.11	0.06	0.06	0.09	0.73	0.3	0.55	0.26	0.08	0.46	2.52356	9.94e-06	0.000213489	Stmn2
ncbi_101122020	0.56	0.19	0.38	0.31	1.2	0.56	1.12	1.1	0.36	0.995	1.4667	1.07e-05	0.000226696	ATP6V0E2
ncbi_100217400	28.04	30.11	27.66	28.67	41.82	74.58	35.88	91.34	28.62	60.905	1.08954	1.11e-05	0.000233554	BTG1
ncbi_101116910	0.27	0.21	0.28	0.39	0.57	0.68	0.56	0.68	0.2875	0.6225	1.11451	1.12e-05	0.000235738	TXNDC16
ncbi_101115970	7.69	8.27	7.3	9.23	24.45	53.96	12.29	65.79	8.1225	39.1225	2.268	1.15e-05	0.000241018	SESN1
ncbi_105616540	0.43	0.69	0.47	0.62	0.2	0.16	0.15	0.33	0.5525	0.21	-1.39559	1.17e-05	0.000242733	KAZN
ncbi_101112314	0.9	0.52	0.93	0.6	1.66	1.02	1.59	2.25	0.7375	1.63	1.14416	1.17e-05	0.000243561	ST8SIA4
MSTRG.8523	5.99	2.16	3.2	3.36	7.27	6.82	10.19	6.8	3.6775	7.77	1.07919	1.21e-05	0.000249723	Pol
ncbi_101123642	0.45	0.33	0.33	0.31	0.87	1.36	0.9	0.87	0.355	1	1.49411	1.28e-05	0.000263905	Epsti1
ncbi_101106954	0.42	0.43	0.62	0.59	0.14	0.23	0.3	0.24	0.515	0.2275	-1.17871	1.36e-05	0.000277955	SDK2
ncbi_101119226	7.26	3.83	6.61	4.86	1.97	1.28	3.77	2.02	5.64	2.26	-1.31937	1.39e-05	0.000284045	LYNX1
ncbi_101107260	0.93	1.05	0.65	1.39	1.64	3.76	1.97	3.39	1.005	2.69	1.42041	1.43e-05	0.000290513	PRODH
ncbi_780499	0.14	0.04	0.13	0.08	0.32	0.87	0.08	1.33	0.0975	0.65	2.73697	1.5e-05	0.000301999	XDH
ncbi_101117815	2.18	2.59	3.28	1.71	0.68	1.34	1.15	0.56	2.44	0.9325	-1.38771	1.52e-05	0.000305976	SH2B2
ncbi_101114076	1.57	1.42	1.45	1.39	0.82	0.59	0.91	0.53	1.4575	0.7125	-1.03253	1.61e-05	0.000321231	GTF2IRD1
ncbi_101112153	7.22	4.53	5.86	5.73	8.83	18.86	7.21	23.99	5.835	14.7225	1.33522	1.64e-05	0.000324999	FOXS1
ncbi_101112502	0.66	0.52	0.56	0.76	1.06	1.51	1.24	1.56	0.625	1.3425	1.10299	1.69e-05	0.000334147	LRRC29
ncbi_101117854	0.57	0.39	0.61	0.71	1.03	1.95	1.34	1.79	0.57	1.5275	1.42214	1.73e-05	0.000341283	TSNARE1
ncbi_114118083	3.83	3.4	2.44	2.78	1.12	1.65	0.59	1.78	3.1125	1.285	-1.27631	1.74e-05	0.000342339	ZNF444
ncbi_101105011	20.4	0	14.09	9.32	0	0	0	0	10.9525	0.001	-13.419	1.76e-05	0.000344722	TEX2
ncbi_101112873	0.44	1.14	0.85	0.78	0.29	0.13	0.18	0.22	0.8025	0.205	-1.96888	1.77e-05	0.000345571	NOXO1
ncbi_101115406	4.92	1.85	3.4	3.5	1.37	1.82	1.32	1.73	3.4175	1.56	-1.1314	1.78e-05	0.000347387	TMEM251
ncbi_105609832	0.39	0.23	0.45	0.42	1.17	0.62	1.08	1.09	0.3725	0.99	1.41019	1.8e-05	0.000350932	MOSPD1
MSTRG.17042	1.59	1.76	1.79	1.55	1.01	0.41	0.46	0.66	1.6725	0.635	-1.39718	1.8e-05	0.000351261	Lrrc30
MSTRG.754	3.83	5.56	7.5	7.39	1.45	3.9	2.72	3.12	6.07	2.7975	-1.11756	1.86e-05	0.00036102	--
ncbi_443547	6.76	7.32	6.3	6.84	20.58	59.58	57.4	10.27	6.805	36.9575	2.4412	1.9e-05	0.00036754	EGR1
ncbi_101104118	0.6	0.67	1.13	0.33	0.2	0.22	0.09	0.23	0.6825	0.185	-1.8833	1.99e-05	0.00038319	NPTX2
ncbi_101118347	1.38	1.88	2.3	1.45	0.8	0.88	0.84	0.54	1.7525	0.765	-1.19588	2.01e-05	0.000386779	FBLN7
ncbi_101105936	0.67	0.38	0.4	0.48	1.14	0.83	0.78	1.17	0.4825	0.98	1.02225	2.03e-05	0.000388183	THNSL1
ncbi_101108688	0.88	1.17	0.89	1.24	1.58	2.53	1.54	2.95	1.045	2.15	1.04083	2.09e-05	0.000398767	CREBRF
ncbi_101109116	4.83	4.67	6	5.17	1.36	3.77	1.77	3.05	5.1675	2.4875	-1.05477	2.15e-05	0.000408009	CBFA2T3
ncbi_100127218	0.13	0	0.11	0	0.79	0.85	0.35	1.95	0.06	0.985	4.03709	2.25e-05	0.000421848	AHSP
ncbi_101113821	32.91	16.41	29.75	17.92	13.95	10.35	13.79	8.67	24.2475	11.69	-1.05256	2.25e-05	0.000421848	Ky
ncbi_101119560	2.32	1.59	2.62	1.65	6.65	3.4	6.34	3.05	2.045	4.86	1.24886	2.32e-05	0.000431591	PITX1
ncbi_101103357	0.16	0.11	0.16	0.07	0.31	0.68	0.49	0.45	0.125	0.4825	1.9486	2.49e-05	0.000458585	IFI44L
ncbi_101111322	2.02	1.46	0.96	2.58	4.45	3.89	2.79	4.66	1.755	3.9475	1.16947	2.69e-05	0.0004923	CRBN
MSTRG.14833	0.49	0.54	0.91	0.29	2.1	1.27	2.11	1.43	0.5575	1.7275	1.63164	2.72e-05	0.00049708	IGHA2
ncbi_105604151	1.13	0.95	0.88	1	0.33	0.48	0.13	0.26	0.99	0.3	-1.72247	2.81e-05	0.000509697	--
ncbi_101114587	1.39	0.96	0.89	1.33	3.78	1.83	2.5	3.21	1.1425	2.83	1.30861	2.83e-05	0.000512517	PLGRKT
ncbi_101103279	0.17	0.09	0.02	0.01	0.69	0.3	0.56	0.22	0.0725	0.4425	2.60962	2.94e-05	0.000531253	GLMP
ncbi_101116013	0.2	0.18	0.23	0.11	0.56	0.58	0.33	0.77	0.18	0.56	1.63743	2.98e-05	0.000536966	GRAMD1C
ncbi_101112745	2.67	5.43	3.55	4.69	1.64	1.98	2.36	1.69	4.085	1.9175	-1.09111	3.01e-05	0.000542192	ABI3
ncbi_101108403	0.98	0.79	1.07	0.56	2.09	1.54	2.9	1.91	0.85	2.11	1.31171	3.09e-05	0.000553887	FN3K
ncbi_101116121	0.78	0.54	0.75	0.38	1.35	1.09	1.07	1.92	0.6125	1.3575	1.14817	3.11e-05	0.00055604	CYP4V2
ncbi_100144429	5.01	12.19	14.11	5.63	3.83	3.96	3.49	3.21	9.235	3.6225	-1.35013	3.13e-05	0.000556173	MCT7
ncbi_101121057	0.15	0.18	0.28	0.18	0.68	0.47	0.3	0.71	0.1975	0.54	1.45111	3.18e-05	0.000563386	THUMPD1
ncbi_101104046	0.66	0.42	0.36	0.24	1.35	0.84	1	1.06	0.42	1.0625	1.339	3.21e-05	0.000566771	SLC19A3
ncbi_101107124	0.29	0.41	0.16	0.37	0.87	0.68	0.78	0.86	0.3075	0.7975	1.3749	3.34e-05	0.000584096	CCNE1
ncbi_101107974	5.47	14.04	9.17	11.28	3.77	5.76	5.08	4.73	9.99	4.835	-1.04697	3.42e-05	0.000594399	SPECC1
ncbi_101115890	0.31	0.25	0.34	0.23	0.42	0.87	0.67	0.72	0.2825	0.67	1.24591	3.46e-05	0.000600607	Camta1
ncbi_105614551	0.17	0.21	0.15	0.12	0.61	0.38	0.26	1	0.1625	0.5625	1.79141	3.53e-05	0.000610498	Tgtp2
ncbi_101110473	0.44	0.1	0.15	0.35	0.67	0.73	0.75	0.5	0.26	0.6625	1.34941	3.71e-05	0.000633848	IFI44
ncbi_114113694	0.23	0.19	0.31	0.22	0.51	0.81	0.44	0.63	0.2375	0.5975	1.33101	3.76e-05	0.000639719	RSAD2
ncbi_101121171	1.39	1.21	2.75	1.55	3.43	3.15	3.96	4.53	1.725	3.7675	1.12701	3.92e-05	0.000661495	STX10
ncbi_105602107	0.16	0.14	0.03	0.14	0.4	0.4	0.41	0.41	0.1175	0.405	1.78526	3.92e-05	0.000661495	ZNF543
ncbi_101105034	0.08	0.07	0.04	0.05	0.1	0.47	0.18	0.28	0.06	0.2575	2.10154	3.97e-05	0.000667351	CDCP1
ncbi_101117888	0.2	0.18	0.26	0.14	0.09	0.04	0.05	0.07	0.195	0.0625	-1.64155	4.1e-05	0.000683693	OPCML
ncbi_101116356	1.15	0.97	1.68	0.95	0.66	0.49	0.72	0.39	1.1875	0.565	-1.0716	4.29e-05	0.000709275	COL11A2
ncbi_101110847	3.53	3.88	3.75	4	1.73	1.72	2.22	0.64	3.79	1.5775	-1.26456	4.37e-05	0.000722032	RAB15
ncbi_101118034	1.51	1.37	1.83	1.39	2.93	3.31	1.97	4.96	1.525	3.2925	1.11037	4.42e-05	0.000728028	ZSWIM7
ncbi_101112715	2.59	0.7	1.58	1.86	0.81	0.46	0.49	0.55	1.6825	0.5775	-1.54271	4.51e-05	0.000740123	KERA
ncbi_101117948	0.36	0.59	0.46	0.23	0.1	0.15	0.16	0.17	0.41	0.145	-1.49957	4.52e-05	0.000740123	Adam11
ncbi_101116024	0.26	0.43	0.33	0.23	0.89	1.31	1.01	0.48	0.3125	0.9225	1.56169	4.56e-05	0.000744855	ARSD
ncbi_101117111	3.65	2.05	1.45	1.15	0.43	0.83	0.71	1.25	2.075	0.805	-1.36605	4.73e-05	0.000772389	AKAP6
ncbi_101105713	0.63	0.65	0.82	0.94	0.42	0.23	0.38	0.46	0.76	0.3725	-1.02876	4.87e-05	0.000793247	PLK1
ncbi_114115250	0.52	1.04	1.07	0.79	0.33	0.3	0.2	0.15	0.855	0.245	-1.80314	4.98e-05	0.000806105	CD38
ncbi_101119893	0.71	1.45	1.6	1.19	2.65	2.51	2.26	2.81	1.2375	2.5575	1.04731	4.98e-05	0.00080658	VRK2
ncbi_100126573	1.46	1.28	2.12	1.29	2.09	4.19	3.39	2.77	1.5375	3.11	1.01633	5.03e-05	0.000811892	TES
ncbi_114109699	7.31	7.6	9.63	9.71	9.34	32.45	15.89	26.78	8.5625	21.115	1.30216	5.09e-05	0.000817966	HIST1H4A
ncbi_101115321	0.68	0.89	0.62	1.08	1.09	3.16	1.77	2.12	0.8175	2.035	1.31574	5.24e-05	0.000836717	C2
ncbi_101119496	0.64	0.22	0.51	0.59	0.99	0.96	1.03	1.24	0.49	1.055	1.10639	5.34e-05	0.000849164	Smpd3
ncbi_101107709	10.39	9.86	4.57	10.41	14.81	22.84	14.52	20.53	8.8075	18.175	1.04515	5.52e-05	0.000874147	SGK1
ncbi_101110596	1.59	0.41	1.4	0.57	0.21	0	0.06	0.27	0.9925	0.135	-2.87811	5.61e-05	0.00088591	GPX2
ncbi_101123098	0.4	0.11	0.31	0.51	0.89	0.64	0.96	1.5	0.3325	0.9975	1.58496	5.71e-05	0.000896604	RFTN2
ncbi_101116070	0.13	0.12	0.13	0.09	0.26	0.37	0.43	0.51	0.1175	0.3925	1.74003	5.82e-05	0.000911726	VMO1
ncbi_101105854	0.68	0.38	0.23	0.45	1.67	0.75	1.1	1.16	0.435	1.17	1.42742	5.87e-05	0.000915767	VPS33B
ncbi_101119098	0.54	0.39	0.64	0.4	2.31	0.66	1.41	1.5	0.4925	1.47	1.57762	5.97e-05	0.000926979	MAGEF1
ncbi_101108051	1.23	1.07	1.94	0.5	3.14	2.56	1.94	3.66	1.185	2.825	1.25336	6.11e-05	0.000943939	BMF
ncbi_101115050	0.39	0.6	0.63	0.25	0.08	0.22	0.08	0.16	0.4675	0.135	-1.79201	6.12e-05	0.000943939	SLC45A3
ncbi_101121828	0.54	0.78	0.51	0.72	0.09	0.29	0.33	0.12	0.6375	0.2075	-1.61931	6.31e-05	0.000972816	ZNF385B
ncbi_101107257	0.79	0.56	0.75	0.59	1.46	1.87	1.74	0.8	0.6725	1.4675	1.12575	6.45e-05	0.000992749	DDX58
MSTRG.19128	0.87	0.64	1.53	0.55	1.09	3.58	2.91	3.07	0.8975	2.6625	1.5688	6.47e-05	0.000994275	Foxk1
ncbi_101108671	2.57	2.39	2.47	2.34	1.71	0.6	0.93	0.94	2.4425	1.045	-1.22486	6.56e-05	0.00100653	P3H4
ncbi_101109209	0.05	0	0.04	0.01	0.15	0.31	0.2	0.23	0.025	0.2225	3.15381	6.6e-05	0.00101279	TTC12
ncbi_101105550	0.37	0.82	0.75	0.69	0.16	0.27	0.33	0.23	0.6575	0.2475	-1.40956	7.33e-05	0.0011043	COL13A1
ncbi_101108689	0.19	0.29	0.18	0.19	0.48	0.63	0.37	0.99	0.2125	0.6175	1.53898	7.87e-05	0.00117627	TAOK3
ncbi_100568292	0.15	0.04	0.1	0.13	0.56	0.26	0.22	0.47	0.105	0.3775	1.84609	8.01e-05	0.00119264	DRD1
ncbi_101123434	2.17	3.38	2.62	3.91	0.98	1.71	1.63	0.64	3.02	1.24	-1.28421	8.05e-05	0.00119669	Foxo6
ncbi_101101923	0.07	0.09	0.12	0	0.22	0.27	0.53	0.28	0.07	0.325	2.21501	8.19e-05	0.00121514	SEC14L4
ncbi_101111639	0.46	0.6	0.29	0.59	0.17	0.13	0.18	0.29	0.485	0.1925	-1.33313	8.67e-05	0.00127533	CNR1
ncbi_114113960	1.2	0.77	1.28	1.39	0.2	0.65	0.31	0.63	1.16	0.4475	-1.37417	9.8e-05	0.00141927	ERFE
ncbi_101109730	0.22	0.76	0.53	0.63	0.13	0.17	0.14	0.11	0.535	0.1375	-1.96011	9.95e-05	0.00143862	CES2
ncbi_114108638	2	1.54	2.5	1.86	1.17	0.81	1.23	0.68	1.975	0.9725	-1.02208	0.000102206	0.00146828	AP5Z1
ncbi_101115304	0.45	0.36	0.67	0.29	0.15	0.28	0.14	0.22	0.4425	0.1975	-1.16382	0.000103165	0.00148055	EXOC3L2
ncbi_494440	0.84	1.38	0.46	1.73	0.33	0.34	0.56	0.31	1.1025	0.385	-1.51785	0.000103884	0.00148935	SLC4A4
ncbi_101110467	1.83	1.39	1.77	1.31	1.03	0.5	0.44	0.69	1.575	0.665	-1.24393	0.000110466	0.00156576	TMEM45A
ncbi_101116298	2.15	1.55	0.68	1.29	3.85	2.8	2.36	4.22	1.4175	3.3075	1.22239	0.000110546	0.00156576	SULT1C4
ncbi_101121264	0.04	0.05	0.1	0.04	0.28	0.18	0.18	0.17	0.0575	0.2025	1.81629	0.000114143	0.0016022	FAM184B
ncbi_114118858	0.02	0	0.01	0.03	0.09	0.09	0.07	0.11	0.015	0.09	2.58496	0.000117044	0.00163317	OAS2
ncbi_101118325	1.1	1.22	1.41	1.05	1.46	3.69	2.8	2.09	1.195	2.51	1.07068	0.000118073	0.00164299	ZC3H12A
MSTRG.18415	18.05	0.87	1.25	8.75	0.41	0.26	0.24	1.08	7.23	0.4975	-3.86123	0.000126767	0.00174126	HSPA8
ncbi_101105908	5.41	3.73	5.25	4	5.19	14.29	6.39	12.64	4.5975	9.6275	1.06631	0.000129309	0.00176413	STRIP2
ncbi_101105585	0.34	0.37	0.33	0.29	0.14	0.18	0.13	0.15	0.3325	0.15	-1.14839	0.000142444	0.00191919	RAPGEFL1
ncbi_101114116	0.03	0.03	0	0.02	0.14	0.59	0.09	0.81	0.02	0.4075	4.34873	0.000150448	0.00200592	COLEC10
ncbi_101111105	1	1.12	1.29	1.21	1.46	3.64	1.74	5.53	1.155	3.0925	1.42088	0.000157011	0.00208554	PM20D2
ncbi_443484	33.3	29.77	28.64	29.79	21.88	5.42	13.33	12.28	30.375	13.2275	-1.19934	0.000157634	0.00209184	HACD1
ncbi_101106828	5.05	3.63	4.65	3.85	5.42	12.41	13.62	6.49	4.295	9.485	1.14299	0.000159191	0.00211052	IFI6
ncbi_101109187	1.45	1.46	1.22	1.75	0.77	0.38	0.59	0.74	1.47	0.62	-1.24548	0.000167422	0.00220306	PI15
ncbi_101116226	0.52	0.32	0.23	0.34	1.38	0.42	1.07	0.77	0.3525	0.91	1.36824	0.000169094	0.00222092	TCAF1
ncbi_101103817	0.98	1.04	0.72	0.79	2.19	1.7	1.47	2.01	0.8825	1.8425	1.062	0.000173396	0.00227031	DPH6
ncbi_101114122	0.38	0.14	0.32	0.38	0.12	0.08	0.11	0.09	0.305	0.1	-1.60881	0.000173499	0.00227031	TMEM132E
ncbi_101114448	0.71	0.65	0.63	0.92	1.92	1.48	1.62	1.06	0.7275	1.52	1.06305	0.000183156	0.00237244	Ttc8
ncbi_105614373	0.12	0.03	0.2	0.05	0.2	0.35	0.56	0.3	0.1	0.3525	1.81762	0.000184389	0.00238403	CYP2B4
ncbi_101116241	0.69	0.26	0.45	0.47	1.81	0.94	0.61	1.2	0.4675	1.14	1.286	0.000186982	0.002408	GJC1
ncbi_101122038	1.22	1.01	0.98	0.97	0.48	0.46	0.77	0.36	1.045	0.5175	-1.01387	0.000187732	0.00241397	Fgf11
ncbi_101105595	1.69	2.84	2.81	1.21	0.83	1.11	0.7	0.9	2.1375	0.885	-1.27218	0.000190149	0.00243615	SDHAF1
ncbi_101108221	0.36	0.25	0.34	0.36	0.48	1.37	1.11	0.45	0.3275	0.8525	1.3802	0.000194188	0.00247664	FAM180A
ncbi_101114768	0.28	0.21	0.26	0.19	0.12	0.11	0.11	0.09	0.235	0.1075	-1.12832	0.0001992	0.00252906	KCNK12
ncbi_105609583	0.54	0.9	0.96	0.86	1.14	3	1.27	2.33	0.815	1.935	1.24746	0.000202523	0.00255574	FRAT1
ncbi_101116417	0.4	0.47	0.46	0.43	0.17	0.2	0.17	0.19	0.44	0.1825	-1.26961	0.000205024	0.00258444	SUV39H2
ncbi_101121641	0.61	0.93	0.77	0.42	1.27	2.25	0.91	2.91	0.6825	1.835	1.42688	0.00020723	0.00260526	TMEM86A
ncbi_114109346	9.75	11.69	8.31	14.24	6.48	3.57	3.19	8.23	10.9975	5.3675	-1.03485	0.000209167	0.00262727	TPRA1
ncbi_101103609	2.22	4.37	2.78	2.76	1.86	0.78	1.24	0.92	3.0325	1.2	-1.33747	0.000215656	0.00269197	Npm3
ncbi_101123419	0.03	0.04	0.05	0.04	0.09	0.18	0.12	0.2	0.04	0.1475	1.88264	0.000217463	0.00269781	C4A
ncbi_101110865	0.21	0.16	0.28	0.21	0.49	0.34	0.4	0.63	0.215	0.465	1.11289	0.000218135	0.00270376	TBCEL
ncbi_101122928	0.92	0.81	1.31	0.92	0.6	0.3	0.55	0.52	0.99	0.4925	-1.0073	0.000219663	0.00271792	EPHB2
ncbi_443419	9.77	9.58	10.08	9.88	11.76	29.38	10.98	34.72	9.8275	21.71	1.14346	0.000220155	0.00272161	STAT5A
ncbi_443273	0.18	0.16	0.11	0.18	0.43	0.32	0.4	0.28	0.1575	0.3575	1.18259	0.000227205	0.00279407	Gria3
ncbi_101110257	0.63	0.97	0.93	0.82	1.98	1.6	1.82	1.46	0.8375	1.715	1.03405	0.000237536	0.00289085	SPTLC3
ncbi_101104856	0.7	0.97	0.49	0.59	0.2	0.19	0.35	0.29	0.6875	0.2575	-1.41679	0.000240008	0.00291589	P4HA3
ncbi_101122170	0.34	0.15	0.3	0.22	0.28	0.86	0.53	0.6	0.2525	0.5675	1.16834	0.00024222	0.00293846	UNC80
ncbi_101115906	1.81	2.08	1.9	0.33	3.4	4.16	3.87	4.03	1.53	3.865	1.33694	0.000243213	0.0029472	PATZ1
ncbi_101109404	1.57	1.57	0.62	1.07	0.54	0.1	0.37	0.52	1.2075	0.3825	-1.65849	0.000246119	0.00297986	USP16
ncbi_105607253	0.14	0.19	0.09	0.12	0.29	0.4	0.46	0.58	0.135	0.4325	1.67974	0.000247689	0.0029914	--
ncbi_101123646	0.17	0.04	0.12	0.27	0.47	0.45	0.68	0.45	0.15	0.5125	1.77259	0.000262316	0.00313327	AFMID
ncbi_678673	1.65	1.58	0.85	1.52	3.16	2.35	2.84	3.1	1.4	2.8625	1.03185	0.000263334	0.00313974	CLN6
ncbi_101110361	0.98	0.5	0.85	0.65	0.4	0.22	0.33	0.4	0.745	0.3375	-1.14235	0.000282518	0.00332515	DTX4
ncbi_100147780	16.39	22.28	12.52	19.98	19.44	56.39	24.75	68.12	17.7925	42.175	1.24512	0.000299045	0.00347923	SLC25A33
ncbi_105604728	1.49	2.95	1.55	3.17	0.97	0.54	0.93	1.29	2.29	0.9325	-1.29617	0.000319847	0.00369173	--
ncbi_101113589	5.04	7.39	3.02	8.64	1.74	3.46	1.82	4.13	6.0225	2.7875	-1.11139	0.000323339	0.00371617	DPP9
ncbi_101104866	1.75	0.83	2.26	0.83	2.82	2.83	2.76	3.05	1.4175	2.865	1.01519	0.000326173	0.00374019	HLA-A
ncbi_101108412	0.23	0.21	0.05	0.2	0.03	0	0.03	0.01	0.1725	0.0175	-3.30117	0.00032733	0.00374291	MATN4
ncbi_105602066	5.63	1.27	1.08	4.58	0.78	0.64	1.07	1.09	3.14	0.895	-1.8108	0.000336093	0.00381058	CD63
ncbi_114118292	0.22	0.3	0.91	0.67	1.16	1.48	1.5	1.72	0.525	1.465	1.48051	0.000341918	0.00386419	ART1
ncbi_101112630	1.05	0.72	0.34	0.54	1.67	1.35	1.41	2.48	0.6625	1.7275	1.38269	0.000347679	0.00391049	ZBTB8OS
ncbi_101119997	9.98	7.61	8.86	7.79	11.94	42.45	13.43	49.7	8.56	29.38	1.77915	0.000348815	0.00392013	SCPEP1
ncbi_101119900	3.6	2.03	0.81	2.63	4.7	4.96	4.57	7.09	2.2675	5.33	1.23303	0.000359959	0.00402611	NT5C3A
ncbi_114109615	1.95	2.87	2.11	4.05	3.79	7.34	4.01	9.28	2.745	6.105	1.15319	0.000361152	0.00403626	CCDC71L
ncbi_114115942	1.14	1.56	0.79	1	1.6	2.52	3.65	1.95	1.1225	2.43	1.11424	0.000365037	0.00406677	GAS2L1
ncbi_101105651	0.68	0.75	0.49	1.11	1.67	1.74	1.56	1.31	0.7575	1.57	1.05145	0.000366746	0.00407629	CYP2D14
ncbi_101109141	0	0	0	0	0.8	1.04	0	0.65	0.001	0.6225	9.28193	0.000366759	0.00407629	SNX29
ncbi_114117878	3.13	0.35	1.16	2.47	6.79	3.84	6.16	5.11	1.7775	5.475	1.62301	0.000378392	0.00416941	Ces1d
ncbi_101102533	0.11	0.03	0.05	0.18	0.34	0.49	0.13	0.76	0.0925	0.43	2.21681	0.000382857	0.00419892	SH2D4A
ncbi_114113217	0.19	0.06	0.13	0.13	0.21	0.49	0.33	0.25	0.1275	0.32	1.32757	0.000384687	0.00421326	Erbb4
ncbi_114118433	0.73	0.21	1.67	0.93	0.12	0.14	0.3	0	0.885	0.14	-2.66025	0.000390699	0.004265	P2ry2
ncbi_101122711	1.32	2.02	1.25	1.71	4.2	2.15	2.53	4.68	1.575	3.39	1.10593	0.000392022	0.00427614	RGS1
ncbi_443057	0.72	0.1	0.1	0.41	1.32	1.3	1.2	1.86	0.3325	1.42	2.09446	0.000413781	0.00447537	ISG15
ncbi_101114379	8.84	10.35	0	21.51	0	0	0	0	10.175	0.001	-13.3127	0.000422992	0.00456449	NDUFA5
ncbi_101118098	0.43	0.33	0.55	0.56	0.8	0.93	1.26	1	0.4675	0.9975	1.09335	0.000424785	0.00458033	POLM
ncbi_101106266	0.13	0.19	0.12	0.29	0.27	0.77	1.09	0.41	0.1825	0.635	1.79886	0.000432362	0.0046478	F2RL1
ncbi_101110262	0.1	0.2	0.12	0.11	0.01	0.03	0.02	0.01	0.1325	0.0175	-2.92057	0.000446831	0.00476698	Dpf1
ncbi_100528013	2.93	1.13	1.38	1.99	3.21	3.67	3.61	4.41	1.8575	3.725	1.00388	0.000466283	0.00493713	--
ncbi_101118982	0.79	0.84	0.61	1.04	0.49	0.29	0.52	0.26	0.82	0.39	-1.07215	0.00047583	0.00500438	SPON1
ncbi_105610494	1.32	0.85	1.33	0.97	0.49	0.34	0.44	0.65	1.1175	0.48	-1.21917	0.000476988	0.00501282	MISP3
MSTRG.15496	0.3	0.64	0.39	0.84	0.66	1.96	0.89	2.11	0.5425	1.405	1.37288	0.000499666	0.00521229	--
ncbi_101121655	0.66	0.48	0.73	0.38	0.18	0.15	0.34	0.13	0.5625	0.2	-1.49185	0.000524953	0.00545587	irs1
ncbi_101108488	0.11	0.1	0.21	0.09	0.38	0.44	0.27	0.29	0.1275	0.345	1.4361	0.000544447	0.00562529	SLC39A8
ncbi_101119613	0.34	1.85	0.9	0	0	0	0	0	0.7725	0.001	-9.59339	0.000586792	0.00597087	PHF24
ncbi_101112307	0.61	2.08	1.21	1.08	0.3	0.1	0.52	0	1.245	0.23	-2.43644	0.000593721	0.006011	LSMEM1
ncbi_101118946	0.27	0.53	0.45	0.49	0.15	0.22	0.07	0.24	0.435	0.17	-1.35548	0.000594674	0.00601633	UNC5A
ncbi_101112002	0.21	0.05	0.26	0.19	0.66	0.33	0.66	0.85	0.1775	0.625	1.81604	0.000612052	0.00616558	SETD9
ncbi_101103679	0.15	0.22	0.2	0.19	0.09	0.11	0.05	0.12	0.19	0.0925	-1.03847	0.00064	0.00638324	PKHD1
ncbi_101120029	0.54	0.71	1.5	0.5	1.37	3.46	2.75	1.46	0.8125	2.26	1.47588	0.000644212	0.00641617	PLA2G16
ncbi_101117116	0.12	0.62	0.08	0.12	0.5	1.98	0.22	1.48	0.235	1.045	2.15277	0.00064496	0.00641908	TXNRD3
ncbi_101105654	0.4	0.14	0.2	0.5	0.62	1.95	1.98	0.35	0.31	1.225	1.98244	0.00064592	0.0064241	CTXN3
ncbi_101121925	0.21	0.18	0.39	0.35	0.76	0.72	0.47	0.9	0.2825	0.7125	1.33464	0.000653734	0.00649723	ADA2
ncbi_101103966	0.78	0.89	1.02	0.6	3.23	1.39	2.22	1.07	0.8225	1.9775	1.26559	0.000674208	0.00664914	DERA
ncbi_101111551	0.52	0.61	0.26	0.32	0.12	0.17	0.17	0.14	0.4275	0.15	-1.51096	0.0006776	0.00667792	TPPP2
ncbi_101106565	1.38	3.21	1.61	3.59	5.03	6.34	7.83	3.13	2.4475	5.5825	1.1896	0.000678208	0.00667923	ADAMTS4
ncbi_101116794	4.69	8.28	4.13	9.88	10.46	17.9	9.07	21.16	6.745	14.6475	1.11876	0.000694884	0.0067951	CIART
ncbi_101105290	78.11	140.73	134.67	128.34	113.26	385.6	198.43	305.29	120.463	250.645	1.05706	0.000703512	0.00686397	HIST1H4A
ncbi_101109915	0.13	0.11	0.13	0.05	0.14	0.43	0.2	0.45	0.105	0.305	1.53842	0.000709166	0.0069069	OAS2
ncbi_101113349	0.18	0.08	0.33	0.23	0.05	0.06	0.03	0.08	0.205	0.055	-1.89812	0.000710119	0.0069114	ANGPTL7
ncbi_101122774	0.04	0.06	0.05	0.01	0.09	0.11	0.17	0.11	0.04	0.12	1.58496	0.000716105	0.00696004	CACNA1B
ncbi_101108968	0.39	0.27	0.26	0.37	0.78	0.58	0.75	0.63	0.3225	0.685	1.0868	0.00072272	0.00700373	EFCAB7
ncbi_101101893	0.43	0.16	0.51	0.41	0.74	0.67	0.9	0.76	0.3775	0.7675	1.02369	0.000724138	0.00700912	C14orf93
ncbi_101120732	2.32	1.5	2.53	1.13	0.88	0.87	0.96	0.38	1.87	0.7725	-1.27543	0.000728317	0.00704473	ARMCX6
ncbi_101123290	0.65	0.8	0.33	0.48	1.73	1.45	0.75	1.48	0.565	1.3525	1.25931	0.000729861	0.00705483	GIMAP7
ncbi_101117596	0.54	0.23	0.3	0.35	1.54	1.08	0.97	0.58	0.355	1.0425	1.55416	0.00078148	0.00747178	EBPL
ncbi_101110344	1.6	0.87	0.72	0.64	2.43	1.32	2.18	2.24	0.9575	2.0425	1.09299	0.000787485	0.00752409	ETV4
ncbi_114117592	0.27	0.9	0.66	0.75	0.02	0.31	0.15	0.15	0.645	0.1575	-2.03395	0.000789508	0.0075332	PCED1A
ncbi_114116100	0.51	0.68	1.01	0.38	1.41	1.46	1.03	1.66	0.645	1.39	1.10771	0.000799229	0.00759847	VNN1
ncbi_101102057	3.17	3.58	2.34	4.2	2.66	10.9	7.52	10.34	3.3225	7.855	1.24134	0.000799584	0.00759847	CD209L2
ncbi_101109032	0.86	0.48	0.91	0.5	0.43	0.3	0.18	0.27	0.6875	0.295	-1.22064	0.000823812	0.00778671	--
ncbi_101114311	0.2	0.17	0.19	0.25	0.38	1.02	0.45	0.88	0.2025	0.6825	1.75291	0.000826889	0.00779677	CCDC197
ncbi_105608393	1.28	1.32	1.25	1.72	0.88	0.33	0.63	0.86	1.3925	0.675	-1.04472	0.000833632	0.00784795	VAMP3
ncbi_114108605	1220.89	634.86	1295.6	624.36	209.57	515.08	461.58	203.14	943.928	347.342	-1.44232	0.000834384	0.00784978	HSPA1B
ncbi_114108636	0.8	0.33	0.41	0.79	1.4	1.1	1.02	1.2	0.5825	1.18	1.01846	0.000864436	0.00809468	SPICE1
ncbi_105607326	0.2	0.08	0.22	0.16	0.37	0.45	0.35	0.57	0.165	0.435	1.39855	0.000910407	0.00845215	--
ncbi_101123345	0.13	0.09	0.13	0.14	0.06	0.04	0.05	0.06	0.1225	0.0525	-1.22239	0.00094841	0.00872451	MED12L
ncbi_101110418	0.47	0.1	0.37	0.16	0.68	0.95	1.38	0.39	0.275	0.85	1.62803	0.00095689	0.00877959	KBTBD13
ncbi_101110450	0.16	0.08	0.11	0.12	0.27	0.19	0.27	0.26	0.1175	0.2475	1.07477	0.000963212	0.0088261	NAIP
ncbi_101116218	29.03	74.31	37.22	66.7	10.25	20.55	9.94	30.2	51.815	17.735	-1.54677	0.000995752	0.00906534	PKDCC
ncbi_101103410	0.21	0.76	1.02	1.19	0.05	0.06	0.23	0.12	0.795	0.115	-2.78932	0.000999544	0.00909398	Hes5
ncbi_101110640	1.14	0.51	1.64	1.14	2.52	2.66	1.2	3.49	1.1075	2.4675	1.15574	0.0010039	0.00911593	Pcbp3
ncbi_101109366	1.3	2.55	1.2	3.39	1.13	0.88	1.17	0.84	2.11	1.005	-1.07005	0.00101075	0.00916637	SYNJ2
ncbi_101116422	0.1	0.11	0.06	0.15	0.01	0.03	0.01	0.02	0.105	0.0175	-2.58496	0.00103678	0.00936627	Lrfn1
ncbi_101103655	0.45	0.71	0.64	0.51	1.27	1.3	0.76	1.39	0.5775	1.18	1.03089	0.00107352	0.00961243	XAF1
ncbi_101107547	1.23	3.82	3.91	3.3	1.57	1.7	1.34	1.33	3.065	1.485	-1.04542	0.00109711	0.00979198	Cadm4
ncbi_101107315	1.63	3	2.2	1.65	1.28	0.55	1.17	1.08	2.12	1.02	-1.0555	0.00114107	0.0100949	TDP2
ncbi_100192433	2.22	1.65	2.08	1.27	2.51	4.32	2.35	6.11	1.805	3.8225	1.08252	0.00114489	0.0101223	FCGR3
ncbi_101114494	8.13	1.67	5.46	3.99	19.5	14.9	27.26	8.37	4.8125	17.5075	1.86311	0.00116288	0.0102364	NR4A2
ncbi_101106599	1.04	1.62	1.54	2.37	0.74	1.02	0.31	0.72	1.6425	0.6975	-1.23563	0.00116924	0.0102795	RIDA
ncbi_101116370	0.97	2	1.11	1.75	0.52	0.49	1.01	0.26	1.4575	0.57	-1.35446	0.0011846	0.0103758	HS3ST2
ncbi_101121233	0.16	0.15	0.2	0.17	0.63	0.21	0.46	0.39	0.17	0.4225	1.31342	0.00119978	0.0104826	TMEM26
ncbi_101103861	1.17	1.48	2.47	0.97	0.51	0.98	0.87	0.63	1.5225	0.7475	-1.0263	0.00129614	0.0111155	CPXM2
ncbi_114116116	0	0.07	0	0	0.84	0.34	0	0.69	0.0175	0.4675	4.73954	0.00129667	0.0111155	ULBP1
ncbi_101103983	0.52	0.1	0.25	0.29	0.75	0.82	0.54	0.97	0.29	0.77	1.40881	0.00131178	0.0111906	TEX9
ncbi_101122544	1.65	3.94	1.98	3.68	2.93	9.76	7.28	5.84	2.8125	6.4525	1.19801	0.00131837	0.0112333	OSGIN1
ncbi_101104990	0.12	0.12	0.02	0.06	0.01	0	0.02	0	0.08	0.0075	-3.41504	0.00136729	0.011587	CDHR3
ncbi_101122347	0	0.03	0.03	0	2.6	0	1.24	2.25	0.015	1.5225	6.66534	0.00139817	0.011785	WWP1
ncbi_101116405	0.29	0.26	0.3	0.15	0.31	2.09	0.36	3.11	0.25	1.4675	2.55336	0.00142076	0.0119246	ARMC2
ncbi_101114623	0.27	0.19	0.3	0.29	0.63	0.62	0.36	0.62	0.2625	0.5575	1.08665	0.00145296	0.0121451	CYSLTR2
ncbi_101118547	0.47	0.49	0.67	0.23	0.28	0.13	0.17	0.2	0.465	0.195	-1.25376	0.00145692	0.0121566	SLC2A10
ncbi_101108502	0.27	0.55	0.29	0.14	0.77	1.13	0.73	0.7	0.3125	0.8325	1.41359	0.00154963	0.0127639	ALDH3A1
ncbi_101111779	0.69	0.64	0.9	0.79	0.52	0.04	0.21	0.19	0.755	0.24	-1.65344	0.00159691	0.013039	IGSF1
ncbi_101116181	0.49	0.33	0.38	0.53	0.09	0.15	0.22	0.17	0.4325	0.1575	-1.45735	0.00162327	0.0132006	Tmie
ncbi_101107726	1.39	0.66	1.52	0.99	2.49	2.96	4.48	1.15	1.14	2.77	1.28085	0.0016383	0.0133009	MAMSTR
ncbi_101120181	7.82	3.11	9.77	4.08	7.45	66.05	54.48	10.22	6.195	34.55	2.47951	0.00165103	0.0133801	Ier5
ncbi_101116745	0.09	0.13	0.31	0.06	0.27	0.76	0.74	0.44	0.1475	0.5525	1.90526	0.00166087	0.0134367	ARL16
ncbi_101114574	0.82	0.96	0.58	0.53	1.17	1.62	1.09	2.3	0.7225	1.545	1.09654	0.00167202	0.0134724	SFR1
ncbi_101105907	0.09	0.1	0.12	0.33	0.04	0.03	0.02	0.07	0.16	0.04	-2	0.00170068	0.0136413	DPP6
ncbi_101106437	0.13	0.22	0.08	0.07	0.43	0.21	0.39	0.37	0.125	0.35	1.48543	0.0017154	0.013728	NT5DC1
ncbi_101111972	0.23	0.03	0.14	0.08	0.57	0.17	0.57	0.26	0.12	0.3925	1.70966	0.00173834	0.0138959	DUOX1
ncbi_101109941	0.05	0.08	0.1	0.12	0.25	0.13	0.15	0.35	0.0875	0.22	1.33015	0.0017425	0.0139212	LY75
ncbi_114112146	0.91	0.67	0.94	0.34	1.02	2.19	1.11	2.08	0.715	1.6	1.16206	0.00182421	0.0145	JAK1
ncbi_105610737	0.26	0.26	0.15	0.32	0.33	1.05	0.35	0.87	0.2475	0.65	1.39301	0.00192071	0.0151052	HASPIN
ncbi_101110996	0.26	0.17	0.21	0.16	0.1	0.04	0.06	0.07	0.2	0.0675	-1.56704	0.00196298	0.015352	CCIN
ncbi_101110324	17.72	67.02	36.6	53.88	67.05	113.15	69.57	115.82	43.805	91.3975	1.06106	0.00198635	0.0154746	ARRDC2
ncbi_101116664	0.5	0.61	0.24	0.67	1.53	1.44	0.44	1.34	0.505	1.1875	1.23357	0.00199753	0.0155377	TNFRSF19
ncbi_101106773	0.16	0.04	0.19	0.1	0.33	0.31	0.21	0.37	0.1225	0.305	1.31603	0.00205285	0.015896	CDKL2
ncbi_101117563	0.04	0.05	0.03	0.05	0.05	0.15	0.08	0.17	0.0425	0.1125	1.40439	0.00206915	0.0159871	Tenm1
ncbi_101105677	2.3	1.53	3.62	3.87	1.06	0.84	2.16	1.49	2.83	1.3875	-1.02831	0.00214364	0.0164219	SIRPA
ncbi_101103483	0.06	0.36	0.35	0.18	0.42	1.45	0.38	0.93	0.2375	0.795	1.74303	0.00216764	0.0165485	MYCT1
ncbi_114113843	0.09	0.2	0.21	0.15	0.05	0.08	0.03	0.03	0.1625	0.0475	-1.77444	0.00222474	0.0169203	Sapcd2
ncbi_114110327	0.13	0.19	0	0	142.03	0	0	214.71	0.08	89.185	10.1226	0.00231773	0.0175235	RPL12
ncbi_114113083	0.45	0.31	0.4	0.64	1.02	0.6	2.12	1.36	0.45	1.275	1.5025	0.00238004	0.0179177	TTC39B
ncbi_101120162	0.24	0.52	0.68	0.34	0.56	1.32	1.08	0.97	0.445	0.9825	1.14265	0.00238342	0.0179335	C19orf57
ncbi_101123584	0.23	0.26	0.23	0.23	0.34	0.59	0.35	0.75	0.2375	0.5075	1.09548	0.0024102	0.0181157	CCDC62
ncbi_101110748	0.42	0.35	0.18	0.64	0.81	1.4	1.27	0.51	0.3975	0.9975	1.32736	0.00244062	0.0182859	Gprc5a
ncbi_101119307	0.22	0.22	0.11	0.18	0.38	0.33	0.61	0.5	0.1825	0.455	1.31797	0.00244952	0.0183161	CFI
ncbi_101106227	0.63	1.18	0.3	1.32	1.76	1.86	1.96	2.43	0.8575	2.0025	1.22359	0.00246104	0.0183705	SPTSSA
ncbi_101122263	1.6	0.58	1.55	0.44	0.48	0.35	0.27	0.05	1.0425	0.2875	-1.85841	0.00246631	0.0183806	EI24
ncbi_101104596	0.16	0.15	0.16	0.1	0.02	0.01	0.08	0.06	0.1425	0.0425	-1.74543	0.00246921	0.0183865	PTPRT
ncbi_101117101	8.56	1.17	7.04	3.1	28.52	13.42	34.34	9.98	4.9675	21.565	2.1181	0.00247291	0.0183954	FOSB
ncbi_101121563	0.23	0.37	0.61	0.36	1.15	0.56	0.72	1.25	0.3925	0.92	1.22894	0.00247352	0.0183954	CYP2J2
ncbi_101117373	0.15	0.21	0.18	0.11	0.05	0.06	0.05	0	0.1625	0.04	-2.02237	0.0025343	0.0187578	ZBTB22
ncbi_101114984	0.09	0	0.05	0.05	0.19	0.22	0.11	0.56	0.0475	0.27	2.50696	0.00253556	0.0187578	SPATS1
ncbi_114118414	0.01	0.07	0.07	0.07	0.16	0.16	0.17	0.29	0.055	0.195	1.82597	0.00254732	0.018825	TRIM5
ncbi_105616801	0.08	0.03	0.06	0.03	0.36	0.25	0.41	0.18	0.05	0.3	2.58496	0.00258032	0.0190091	--
ncbi_101120673	0.02	0.05	0.03	0.04	0	0	0	0.01	0.035	0.0025	-3.80735	0.0026049	0.0190706	KCNQ3
ncbi_101115759	0.68	0.34	0.48	0.22	0.98	0.7	1.1	0.76	0.43	0.885	1.04134	0.00260925	0.0190727	ARSE
ncbi_101102386	0.03	0.09	0.08	0.02	0.24	0.15	0.25	0.11	0.055	0.1875	1.76939	0.00276791	0.0199387	SLC13A4
ncbi_114118046	0.97	0.63	1.15	1.22	0.66	0.24	0.46	0.43	0.9925	0.4475	-1.14918	0.00282098	0.020183	--
ncbi_101115261	0.05	0.3	0.1	0.2	0.03	0	0.06	0	0.1625	0.0225	-2.85244	0.00284181	0.0202885	DDX60
ncbi_101122239	0.84	0.69	0.71	0.61	1.97	0.67	1.64	1.91	0.7125	1.5475	1.11898	0.00286493	0.0204122	SMCO1
ncbi_101115799	0.1	0.08	0.11	0.07	0.02	0.01	0.02	0	0.09	0.0125	-2.848	0.0029067	0.0206577	PRSS35
ncbi_114116943	0.08	0.46	0.4	0.54	1.12	0.72	0.82	0.87	0.37	0.8825	1.25407	0.00295338	0.0209471	LRIG2
ncbi_101123268	0.01	0.01	0.02	0.02	0.13	0.05	0.06	0.12	0.015	0.09	2.58496	0.00299418	0.0211832	RPN1
ncbi_101115990	1.13	2.35	1.49	2.72	3.03	6.17	2.82	9.28	1.9225	5.325	1.4698	0.00299936	0.0212082	SETD7
ncbi_114117237	1.04	1.54	0.51	0.78	0.27	0.46	0.6	0.34	0.9675	0.4175	-1.21249	0.00300072	0.0212082	ERVK-7
ncbi_101114276	1.28	1.56	1.01	1.69	0.42	0.6	0.88	0.4	1.385	0.575	-1.26825	0.00306445	0.0215291	Nmes1
ncbi_101122119	0.15	0.08	0.09	0.19	0.02	0.07	0.02	0.03	0.1275	0.035	-1.86507	0.00313746	0.0218459	PCDH8
ncbi_101116293	0.47	0.18	0.34	0.44	0.54	0.73	0.75	0.97	0.3575	0.7475	1.06413	0.00315017	0.0218822	UBXN11
ncbi_114117808	1.36	0.83	0.18	2.43	5.55	2.09	3.39	2.48	1.2	3.3775	1.49292	0.00344597	0.0236206	UAP1
ncbi_101115079	0.15	0.1	0.13	0.02	0.3	0.24	0.4	0.22	0.1	0.29	1.53605	0.00362018	0.0245989	Extl2
ncbi_101109515	0.92	0.99	0.97	0.62	0.31	0.34	0.28	0.53	0.875	0.365	-1.26139	0.0037308	0.0252053	CITED1
ncbi_101118378	0.24	0.95	0.67	1.11	0.2	0.39	0.3	0.23	0.7425	0.28	-1.40696	0.003759	0.0253593	IRX5
ncbi_101119647	2.29	1.42	1.73	1.87	1.2	0.4	1.25	0.4	1.8275	0.8125	-1.16943	0.00378082	0.0254821	THEM6
ncbi_114109046	0	0	0	0	0.44	0.68	0.79	0	0.001	0.4775	8.89936	0.00394319	0.0262997	EAPP
MSTRG.3547	0.08	1.13	0.22	1.48	0.11	0.31	0.06	0.18	0.7275	0.165	-2.14048	0.00395694	0.0263665	--
ncbi_101108052	0.2	0.28	0.49	0.27	0.13	0.07	0.04	0.17	0.31	0.1025	-1.59664	0.0040221	0.0266871	HDC
ncbi_101121945	0.08	0.32	0.27	0.21	0.58	0.63	0.38	0.47	0.22	0.515	1.22707	0.00404234	0.026771	UPF3A
ncbi_101105489	0.25	0.34	0.19	0.5	0.48	1.27	0.33	1.26	0.32	0.835	1.3837	0.00407476	0.0269477	PAX8
ncbi_443457	0	0	0	0	0.09	0.06	0.2	0	0.001	0.0875	6.45121	0.00413379	0.0273125	PPARA
ncbi_101116995	0.59	0.28	0.36	0.52	0.21	0.12	0.28	0.18	0.4375	0.1975	-1.14743	0.00424364	0.0278189	RSPO3
ncbi_101102070	0.14	0.05	0.14	0.06	0.5	0.13	0.39	0.27	0.0975	0.3225	1.72583	0.00426158	0.0278952	DPYS
ncbi_101118079	0	0	0	0	0.25	0	0.15	0.07	0.001	0.1175	6.87652	0.00434708	0.0283496	MYO3B
ncbi_101102324	0.77	0.56	0.76	0.58	0.42	0.22	0.14	0.39	0.6675	0.2925	-1.19033	0.00435467	0.0283782	METTL18
ncbi_101118461	0.25	0.37	0.26	0.16	0.3	0.55	0.65	0.71	0.26	0.5525	1.08746	0.00447233	0.0289786	KIF18B
ncbi_105601845	0.12	1.14	0.28	0.23	0.13	0.06	0	0	0.4425	0.0475	-3.21968	0.00450132	0.0290729	RPL10
ncbi_443405	11.19	10.19	16.42	8.07	5.34	2.75	5.81	1.06	11.4675	3.74	-1.61644	0.00456271	0.0293213	MYOD1
ncbi_101107758	0.02	0.06	0.27	0.09	0.19	0.41	0.33	0.24	0.11	0.2925	1.41093	0.00465345	0.029769	FAM19A3
ncbi_101110481	0.01	0.01	0.02	0	0.05	0.05	0.07	0.04	0.01	0.0525	2.39232	0.00474772	0.0301298	KIAA2012
ncbi_101114735	0.54	0.66	0.71	0.77	0.25	0.48	0.35	0.21	0.67	0.3225	-1.05486	0.00478488	0.0303344	FAM181B
ncbi_101112783	0.34	0.66	0.68	0.59	0.25	0.32	0.2	0.16	0.5675	0.2325	-1.28739	0.00479291	0.030358	Dok6
ncbi_101116259	0.17	0.16	0.25	0.11	0.05	0.05	0.03	0.06	0.1725	0.0475	-1.8606	0.00489048	0.0308236	CCDC116
ncbi_101109723	0.33	0.51	0.41	0.81	0.1	0.38	0.19	0.18	0.515	0.2125	-1.27711	0.00503598	0.0315572	ZNF385C
ncbi_114115617	0.5	1.53	0.86	1.07	0	0.17	0.2	0	0.99	0.0925	-3.4199	0.00504481	0.0315844	GBP2
ncbi_101119037	0.14	0.11	0.1	0.13	0.39	0.17	0.33	0.23	0.12	0.28	1.22239	0.00506087	0.0316428	MAPK8IP2
ncbi_106991529	8.36	3.8	7.5	5.7	11.57	20.77	5.87	33.47	6.34	17.92	1.49902	0.00507332	0.0316925	IRF4
ncbi_105616536	0.58	0.96	0.72	0.82	0.53	0.33	0.38	0.28	0.77	0.38	-1.01886	0.00514376	0.0320123	FNDC10
ncbi_101105544	2.01	2.8	3.8	2.24	2.44	7.72	3.38	8.43	2.7125	5.4925	1.01784	0.00526723	0.0326303	Tgif1
ncbi_101111409	0.87	0.32	0.58	0.53	0.72	1.79	0.71	2.17	0.575	1.3475	1.22865	0.00531048	0.0328392	CD1A
ncbi_101114701	0.9	1.34	1.44	0.65	0.62	0.48	0.69	0.35	1.0825	0.535	-1.01676	0.00539192	0.0332478	Olfm2
ncbi_101120169	0.21	0.05	0.24	0.03	0.14	1.57	1.43	0.05	0.1325	0.7975	2.58949	0.0054506	0.0334853	Arc
ncbi_101121460	0.09	0.16	0.05	0.05	0.24	0.23	0.47	0.16	0.0875	0.275	1.65208	0.00545949	0.0335107	ACOX2
ncbi_101103657	0.22	0.11	0.06	0.07	0.29	0.25	0.4	0.46	0.115	0.35	1.60572	0.00551111	0.0337248	Tmem220
ncbi_105612521	0.38	0.17	0.3	0.51	0.13	0	0.09	0.03	0.34	0.0625	-2.44361	0.00569839	0.0346302	PALLD
ncbi_114118469	0.34	0.56	0.58	0.71	1.42	1.23	0.96	0.94	0.5475	1.1375	1.05494	0.00573813	0.0348267	NCAPD3
ncbi_101119628	0.43	0.3	0.23	0.23	0.79	0.71	0.51	0.52	0.2975	0.6325	1.08818	0.00581066	0.0351609	FANCL
ncbi_100137067	2.27	6.14	6.41	2.67	5.74	11.38	6.02	16.79	4.3725	9.9825	1.19094	0.00583867	0.0352849	FABP4
ncbi_105610484	0.15	0.19	0.07	0.26	0.06	0.08	0.04	0.06	0.1675	0.06	-1.48113	0.00591474	0.0356529	ZNF791
ncbi_101116446	0.72	0.44	0.92	0.45	0.28	0.42	0.19	0.28	0.6325	0.2925	-1.11263	0.00592738	0.0356833	NTN3
ncbi_106991782	0.13	0.07	0.33	0.07	0.03	0.01	0.07	0.02	0.15	0.0325	-2.20645	0.00598116	0.0358691	--
ncbi_101118831	0.06	0.21	0	0.29	0.29	1.04	0.7	0.37	0.14	0.6	2.09954	0.00620448	0.0368633	AMY2B
ncbi_101105594	0.16	0.31	0.08	0.11	0.32	0.67	0.41	0.31	0.165	0.4275	1.37346	0.00623965	0.0369787	CCDC155
ncbi_101102903	0.1	0.21	0.19	0.1	0.05	0.09	0.07	0.04	0.15	0.0625	-1.26303	0.00626393	0.037107	ADAMTS3
ncbi_101109802	0.12	0.04	0.11	0.04	0.02	0.02	0.01	0.02	0.0775	0.0175	-2.14684	0.00637559	0.0376893	Ccdc158
ncbi_101103001	0.81	0.44	0.69	0.17	1.25	0.78	1.15	1.39	0.5275	1.1425	1.11495	0.00652812	0.0384137	PCED1A
ncbi_101121023	0.42	0.37	0.56	0.38	1.36	0.99	0.79	0.49	0.4325	0.9075	1.0692	0.00663145	0.0388111	DHRS13
ncbi_101114550	0.46	0.99	0.61	0.69	1.11	1.69	1.78	1.28	0.6875	1.465	1.09147	0.00665544	0.0388869	TRAPPC6A
ncbi_101113178	0.19	0.11	0.18	0.22	0.06	0.06	0.08	0.07	0.175	0.0675	-1.3744	0.00673345	0.039245	CDC25A
ncbi_100135448	0.22	0.34	0.39	0.27	0.17	0.09	0.15	0.15	0.305	0.14	-1.12338	0.00678858	0.0394847	ARNT2
ncbi_101113768	0.07	0.06	0.08	0.11	0.21	0.21	0.27	0.09	0.08	0.195	1.2854	0.00692652	0.040072	MROH6
ncbi_101117406	0.14	0.4	0.77	1.31	0.89	7.5	1.11	4.73	0.655	3.5575	2.4413	0.00700386	0.0403538	GABARAPL1
ncbi_101107128	0.45	0.34	0.57	0.38	0.16	0.38	0.19	0.12	0.435	0.2125	-1.03355	0.00701281	0.0403792	ZNF568
ncbi_101105814	0.13	0.09	0.17	0.09	0.03	0.03	0.04	0.01	0.12	0.0275	-2.12553	0.00711767	0.0408259	MYCN
ncbi_101121144	0	0.02	0.13	0.02	0.06	0.37	0.32	0.19	0.0425	0.235	2.46713	0.00726911	0.0413746	MUC13
ncbi_101112835	0.2	0.21	0.21	0.1	0.35	0.46	0.22	0.49	0.18	0.38	1.078	0.00731923	0.0415592	LIN9
MSTRG.19184	0.31	0.58	0.21	0.53	0.76	1.45	1.65	1.48	0.4075	1.335	1.71197	0.00752784	0.0424359	GBP2
ncbi_101113636	0.28	0.1	0.56	0.26	1.13	0.4	0.94	0.45	0.3	0.73	1.28293	0.00764069	0.0429518	VCAM1
ncbi_101104142	0.46	0.1	0.17	0.13	0.06	0.05	0.12	0.06	0.215	0.0725	-1.56828	0.00775731	0.0434514	IKZF4
ncbi_101114442	0.15	0.39	0.09	0.51	0.06	0.13	0.12	0.06	0.285	0.0925	-1.62344	0.00789327	0.0439857	ZNF426
ncbi_100568286	10.24	6.45	7.59	10.32	0	0	0	0.85	8.65	0.2125	-5.34717	0.00800176	0.0444147	CYP2D14
ncbi_105613406	0.32	0.15	0.55	0.38	0.03	0.06	0.14	0.12	0.35	0.0875	-2	0.00819012	0.0453174	ZNF677
ncbi_101105979	0.08	0.02	0.08	0.02	0.15	0.11	0.18	0.2	0.05	0.16	1.67807	0.00834693	0.0460224	GCA
ncbi_101105219	0.02	0.05	0.15	0.05	0.37	0.11	0.27	0.15	0.0675	0.225	1.73697	0.00835469	0.0460472	TAF7L
ncbi_114117995	0.03	0.68	0	0.5	0	0.07	0	0	0.3025	0.0175	-4.11151	0.0084444	0.0463965	CEACAM6
ncbi_101116059	0.24	0.13	0.34	0.11	0.07	0.09	0.12	0.05	0.205	0.0825	-1.31316	0.00849201	0.0465854	SNAP91
ncbi_101113016	0.25	0.27	0.4	0.21	0.12	0.12	0.19	0.08	0.2825	0.1275	-1.14775	0.00869493	0.0473484	CX3CR1
ncbi_101105818	0.07	0.05	0.09	0.13	0.03	0.02	0.01	0.02	0.085	0.02	-2.08746	0.0087012	0.0473626	SLC25A41
ncbi_114116094	2.34	0.89	2.25	0.83	5.69	1.98	2.95	3.19	1.5775	3.4525	1.13	0.00877077	0.0476142	SMIM8
ncbi_114113917	0.08	0.41	0.23	0.42	0.08	0.14	0.11	0.09	0.285	0.105	-1.44057	0.00884215	0.0478543	METTL14
ncbi_443135	0.31	0.35	0.32	0.57	0.65	0.84	0.93	0.7	0.3875	0.78	1.00928	0.00916677	0.0491955	PTHLH
ncbi_114113806	0.14	0.05	0.39	0.08	0.3	0.55	0.4	0.83	0.165	0.52	1.65605	0.00931038	0.0498144	IL4R

## Sheet: 1.5 y vs 3.5 y
DEGs in 1.5 y vs 3.5 y
id	B-1_fpkm	B-2_fpkm	B-3_fpkm	B-4_fpkm	C-1_fpkm	C-2_fpkm	C-3_fpkm	C-4_fpkm	B_mean	C_mean	log2(fc)	PValue	FDR
ncbi_106990107	4.17	3.16	7.32	4.04	290.84	666.13	827.21	332.32	4.6725	529.125	6.82327	3.56133e-98	5.25794e-94
ncbi_114116628	0.05	0.15	0	0.05	2.37	3.64	2.53	2.66	0.0625	2.8	5.48543	4.23203e-40	3.12408e-36
MSTRG.18415	0.41	0.26	0.24	1.08	14.02	8.63	9.29	9.71	0.4975	10.4125	4.38748	7.83556e-31	3.85614e-27
ncbi_101112614	3.38	3.63	2.89	3.6	7.5	9.97	7.82	8.07	3.375	8.34	1.30516	2.71887e-27	1.00353e-23
ncbi_101113965	3.69	4.79	4.89	4.46	0.77	0.82	0.78	0.93	4.4575	0.825	-2.43377	2.50267e-25	7.38989e-22
ncbi_101105932	5.71	5.31	5.46	6.36	1.11	1.68	0.81	0.63	5.71	1.0575	-2.43283	5.15176e-22	1.26768e-18
ncbi_443262	1.01	1.53	1.19	1.82	4.61	6.61	6.45	4.58	1.3875	5.5625	2.00325	1.15034e-21	2.42623e-18
ncbi_101120031	0.39	0.08	0.29	0.2	1.87	1.51	2.35	1.9	0.24	1.9075	2.99058	2.15412e-15	3.97542e-12
ncbi_101108736	5.88	4.83	5.28	4.19	10.74	16.16	12.89	15.93	5.045	13.93	1.46527	2.43152e-15	3.98877e-12
ncbi_100642179	0.74	0.95	0.76	0.85	1.82	2.2	2.15	2.23	0.825	2.1	1.34792	3.35099e-15	4.9474e-12
ncbi_105601852	0.42	0.32	0.42	1.05	3	4.36	2.71	2.65	0.5525	3.18	2.52498	4.14706e-14	5.56611e-11
ncbi_101120392	0	0	0	0.08	1.75	12.41	7.88	8.38	0.02	7.605	8.5708	5.48571e-14	6.74926e-11
ncbi_101122202	6.55	5.71	6.87	6.3	2.91	2.94	2.64	3.29	6.3575	2.945	-1.11019	2.44888e-12	2.58252e-09
ncbi_101123247	1.12	1.09	0.93	1.09	0.37	0.35	0.48	0.4	1.0575	0.4	-1.40259	6.49267e-12	6.39052e-09
ncbi_101121275	12.43	15.05	17.46	11.12	6.07	3.34	3.82	3.17	14.015	4.1	-1.77328	4.36821e-11	4.03077e-08
ncbi_101122152	1.49	1.46	1.12	1.97	3.76	4.07	3.57	4.93	1.51	4.0825	1.4349	6.21943e-11	5.10131e-08
ncbi_101102541	4.3	4.6	5.37	4.49	13.36	16.82	11.64	8.73	4.69	12.6375	1.43005	1.25042e-10	9.71645e-08
ncbi_101121283	7.08	8.19	6.12	6.18	15.39	16.08	17.65	14.39	6.8925	15.8775	1.20388	2.02237e-10	1.49291e-07
ncbi_101110925	225.93	133.13	239.5	208.49	715.5	553.2	1094.56	444.51	201.762	701.942	1.79869	2.94697e-10	2.07186e-07
ncbi_100135440	170.55	133.26	131.59	265.34	28.34	60.7	74.46	63.7	175.185	56.8	-1.62492	5.10006e-10	3.28478e-07
ncbi_101112196	1.61	1.6	1.81	1.89	0.68	0.9	0.92	0.7	1.7275	0.8	-1.11061	5.11717e-10	3.28478e-07
ncbi_101102585	2.07	3.73	3.47	1.7	0.6	0.11	0.22	0.62	2.7425	0.3875	-2.82322	1.3798e-09	8.48806e-07
ncbi_101107952	0.27	0.24	0.16	0.26	1.05	0.59	0.67	0.99	0.2325	0.825	1.82716	1.78457e-09	1.0539e-06
ncbi_101109405	0.18	0.23	0.21	0.18	0.63	0.72	0.39	0.56	0.2	0.575	1.52356	3.21646e-09	1.80114e-06
ncbi_780441	0.91	3.07	2.52	1.01	0.35	0.12	0.23	0.31	1.8775	0.2525	-2.89446	3.29388e-09	1.80114e-06
ncbi_101122544	2.93	9.76	7.28	5.84	1.75	1.59	2.31	1.68	6.4525	1.8325	-1.81605	3.53707e-09	1.86505e-06
MSTRG.8523	7.27	6.82	10.19	6.8	2.89	3.01	3.89	2.69	7.77	3.12	-1.31637	4.17165e-09	2.1238e-06
ncbi_101111650	34.81	35.18	42.31	25.89	16.45	10.83	13.82	15.2	34.5475	14.075	-1.29545	1.2466e-08	6.01975e-06
ncbi_101111305	4.64	3.51	4.43	4.79	1.43	1.25	2.32	0.83	4.3425	1.4575	-1.57503	1.26397e-08	6.01975e-06
ncbi_100302636	37.9	43.26	50.39	30.83	17.66	18.35	19.52	22.72	40.595	19.5625	-1.05321	1.34838e-08	6.14705e-06
ncbi_101112949	1.98	2.32	2.09	1.84	0.9	0.92	1.06	1.14	2.0575	1.005	-1.0337	1.37397e-08	6.14705e-06
ncbi_114118760	0.2	0.23	0.47	0.33	0.82	1.42	1.4	1.06	0.3075	1.175	1.934	2.64036e-08	1.11378e-05
ncbi_101119610	0.25	0.28	0.08	0.17	0.22	322.3	0.16	303.7	0.195	156.595	9.64935	3.80598e-08	1.56087e-05
ncbi_101104340	1.62	2.52	3.02	1.84	3.44	7.83	5.77	6.57	2.25	5.9025	1.3914	6.27994e-08	2.50587e-05
ncbi_101109022	0.88	0.65	1.11	0.27	1.46	4.54	3.55	3	0.7275	3.1375	2.1086	8.74536e-08	3.35828e-05
ncbi_101107974	3.77	5.76	5.08	4.73	7.27	19.14	20.22	8.96	4.835	13.8975	1.52324	8.87111e-08	3.35828e-05
ncbi_101120397	0.18	0.16	0.1	0.3	1.17	0.59	0.33	1.68	0.185	0.9425	2.34897	1.31363e-07	4.84862e-05
ncbi_101119426	14.06	13.4	7.31	12.75	4.01	5.9	5.25	4.55	11.88	4.9275	-1.26961	1.52219e-07	5.48138e-05
ncbi_114116662	0	0	0	0	0.21	0.7	0.58	0.21	0.001	0.425	8.73132	1.70037e-07	5.97719e-05
ncbi_101108411	13.95	20.74	13.95	20.81	23.67	47.67	35.96	33.02	17.3625	35.08	1.01467	1.91395e-07	6.57153e-05
ncbi_100037663	42.39	29.93	28.74	48.28	69.26	88.29	62.47	80.02	37.335	75.01	1.00655	2.05706e-07	6.90237e-05
ncbi_101122203	1.79	3.35	2	2.55	1.1	0.38	0.85	0.5	2.4225	0.7075	-1.77569	2.1669e-07	7.10935e-05
ncbi_101116995	0.21	0.12	0.28	0.18	0.49	1.21	0.64	0.81	0.1975	0.7875	1.99543	2.43126e-07	7.80329e-05
MSTRG.8967	0.8	4.29	1.2	4.78	0.21	0.2	0.15	0.02	2.7675	0.145	-4.25446	2.65945e-07	8.35407e-05
ncbi_101109366	1.13	0.88	1.17	0.84	1.61	2.37	2.12	2.25	1.005	2.0875	1.05458	2.8054e-07	8.62896e-05
ncbi_101116069	5.55	15.91	7.78	14	3.11	5.49	3.26	4.67	10.81	4.1325	-1.38728	3.19097e-07	9.42229e-05
ncbi_101109730	0.13	0.17	0.14	0.11	0.79	0.5	0.72	0.6	0.1375	0.6525	2.24655	3.51116e-07	0.000101645
ncbi_101110964	0.03	0	0.03	0.11	0.38	0.27	0.43	0.4	0.0425	0.37	3.12199	4.09113e-07	0.000116157
ncbi_101111848	9.34	10.83	9.92	9.67	25.5	16.46	17.98	20.59	9.94	20.1325	1.01821	4.86605e-07	0.000135552
ncbi_101113558	8.87	5.47	7.87	7.66	1.88	3.62	3.16	4.35	7.4675	3.2525	-1.19908	5.02726e-07	0.000137449
ncbi_100125623	1.06	1.5	1.28	0.71	0.47	0.35	0.49	0.26	1.1375	0.3925	-1.5351	5.27687e-07	0.00014165
ncbi_101107094	24.49	15.19	19.85	16.85	10.51	8.56	8.07	9.26	19.095	9.1	-1.06926	5.87515e-07	0.000154894
ncbi_101119224	0.32	0.54	0.36	0.54	0.73	1.01	1.05	0.97	0.44	0.94	1.09516	6.32699e-07	0.00016388
ncbi_105602911	3.4	6.81	6.12	4.77	2.15	1.83	2.96	1.75	5.275	2.1725	-1.27981	7.35497e-07	0.000187222
ncbi_101114236	1.32	1.5	1.59	1.1	3.62	2.77	3.16	2.69	1.3775	3.06	1.15148	9.54631e-07	0.000231052
ncbi_101103329	1.78	1.32	1.5	1.78	0.37	1.02	0.39	0.7	1.595	0.62	-1.36322	9.75749e-07	0.000232354
ncbi_101118080	1.82	3.42	2.95	1.73	0.76	1.28	0.89	0.97	2.48	0.975	-1.34687	1.07391e-06	0.000244402
ncbi_101110700	0	0	0	0	0.18	1.12	0.18	0.43	0.001	0.4775	8.89936	1.07419e-06	0.000244402
ncbi_101110430	0.05	0.12	0.04	0.04	0.2	0.42	0.34	0.31	0.0625	0.3175	2.34483	1.12857e-06	0.000252457
ncbi_101121229	0.43	0.26	0.4	0.31	0.78	1	1.3	1.09	0.35	1.0425	1.57462	1.31813e-06	0.000290461
ncbi_101106263	0.63	0.36	0.56	0.29	1.03	1.2	1.17	1.2	0.46	1.15	1.32193	1.98758e-06	0.000431539
ncbi_105616722	10.76	19.44	15.35	14.83	3.43	8.34	6.7	8.91	15.095	6.845	-1.14095	2.6125e-06	0.000551013
ncbi_101105600	1.47	1.05	1.39	1.03	0.52	0.63	0.5	0.76	1.235	0.6025	-1.03548	2.70965e-06	0.000563454
ncbi_101108361	0.66	2.39	2.04	1.65	0.74	0.29	0.18	0.37	1.685	0.395	-2.09282	3.44802e-06	0.000687927
MSTRG.15432	7.19	3.25	2.74	9.5	1.16	2.33	2.13	1.84	5.67	1.865	-1.60417	3.70287e-06	0.000719331
ncbi_101113354	11.02	11.19	11.66	9.31	37.38	36.24	14.8	24.27	10.795	28.1725	1.38392	3.91241e-06	0.00074168
ncbi_443483	135.07	72.83	112.26	128.48	31.33	60.93	31.59	71.92	112.16	48.9425	-1.1964	4.90654e-06	0.000887795
ncbi_101109026	0.64	0.83	0.81	0.65	1.78	4.04	4.86	0.7	0.7325	2.845	1.95753	4.93086e-06	0.000887795
ncbi_100568292	0.56	0.26	0.22	0.47	1.11	1.69	0.59	1.72	0.3775	1.2775	1.75877	5.20438e-06	0.000925752
ncbi_443186	0.24	0.24	0.21	0.06	1.17	1.01	0.73	0.29	0.1875	0.8	2.09311	5.58794e-06	0.000982147
ncbi_443259	4.86	11.83	9.45	6.65	2.12	3.48	2.9	5.06	8.1975	3.39	-1.2739	6.01753e-06	0.00104521
ncbi_443255	129.83	255.92	262.27	100.21	62.53	74.26	30.51	94.05	187.058	65.3375	-1.5175	7.0719e-06	0.00118647
ncbi_101111234	1.11	1.74	1.75	1.28	0.57	0.55	0.52	0.95	1.47	0.6475	-1.18286	7.32156e-06	0.00121456
ncbi_101113636	1.13	0.4	0.94	0.45	0.18	0.24	0.1	0.23	0.73	0.1875	-1.96101	7.41752e-06	0.0012168
ncbi_101108508	0.16	0.04	0.07	0.08	0.19	1.93	0.14	2.09	0.0875	1.0875	3.63559	1.03096e-05	0.00161927
ncbi_101112936	1.51	1.54	1.35	1.74	0.65	0.7	0.62	0.96	1.535	0.7325	-1.06734	1.10127e-05	0.00169367
ncbi_101112629	1.18	0.72	1.07	0.88	1.76	3.2	2.01	1.42	0.9625	2.0975	1.12381	1.29266e-05	0.00194743
ncbi_101121723	1.53	1.78	1.48	1.74	0.78	0.38	0.26	0.88	1.6325	0.575	-1.50545	1.82044e-05	0.0025833
ncbi_101118624	4.3	4.44	6.05	3.83	2.75	1.83	1.94	2.4	4.655	2.23	-1.06174	1.83722e-05	0.0025833
MSTRG.4689	2.07	0.98	1.73	1.95	4.07	5.12	3.41	3.49	1.6825	4.0225	1.25749	2.7828e-05	0.00345254
ncbi_114109131	1.97	1.96	2.39	3.23	1.06	1.52	0.88	0.68	2.3875	1.035	-1.20587	2.96769e-05	0.00365125
ncbi_101105335	3.72	1.64	2.91	2.25	5.11	6.24	6.24	4.75	2.63	5.585	1.08649	3.03243e-05	0.00366973
ncbi_443005	10167.4	162.89	162.72	12026.9	93.71	101.65	210.78	188.72	5629.97	148.715	-5.2425	3.18276e-05	0.00378954
ncbi_106991578	1.17	3.09	1.39	1.68	4.79	4.25	3.13	4.16	1.8325	4.0825	1.15564	3.38396e-05	0.00393392
ncbi_101105958	4.49	12.14	8.86	9.5	3.18	5.02	4.76	3.65	8.7475	4.1525	-1.07489	3.575e-05	0.00410838
ncbi_101114751	3.18	2.87	3.65	3.27	4.45	10.85	4.44	8.06	3.2425	6.95	1.09991	3.58969e-05	0.00410838
ncbi_101115017	0.89	1.39	1.09	0.64	2.47	4.23	1.35	2.63	1.0025	2.67	1.41324	4.06675e-05	0.00441482
MSTRG.17042	1.01	0.41	0.46	0.66	1.98	1.75	1.47	1.72	0.635	1.73	1.44594	4.17549e-05	0.00449978
ncbi_101102869	0.59	0.91	0.69	1.19	0.34	0.18	0.37	0.41	0.845	0.325	-1.37851	4.48949e-05	0.0048031
ncbi_114108725	2.6	3.94	2	2.42	1.58	0.86	1.05	1.14	2.74	1.1575	-1.24316	4.94568e-05	0.00510616
ncbi_101109915	0.14	0.43	0.2	0.45	0.1	0.07	0.15	0.04	0.305	0.09	-1.76081	5.8526e-05	0.0055747
ncbi_100294595	10.47	8.4	12.66	5.9	4.54	2.79	4.2	5.47	9.3575	4.25	-1.13866	5.89682e-05	0.00558081
ncbi_101111989	1.18	2.2	4.55	1.35	7.82	5.14	6.58	6.99	2.32	6.6325	1.51543	6.01775e-05	0.00562317
ncbi_101106828	5.42	12.41	13.62	6.49	4.37	1.78	3.05	4.17	9.485	3.3425	-1.50472	6.44125e-05	0.00590675
ncbi_114109001	3.57	3.59	2.25	5	1.49	1.4	2.36	1.24	3.6025	1.6225	-1.15078	7.40142e-05	0.0066227
ncbi_114118414	0.16	0.16	0.17	0.29	0.05	0	0.03	0.01	0.195	0.0225	-3.11548	7.63562e-05	0.00679111
ncbi_101122635	0.6	0.46	0.79	0.53	1.31	1.46	1.97	0.99	0.595	1.4325	1.26757	8.75735e-05	0.00756102
ncbi_101117395	10.41	12.79	10.11	4.65	21.67	24.51	22.18	15.2	9.49	20.89	1.13833	8.90439e-05	0.00764328
ncbi_101118079	0.25	0	0.15	0.07	0.01	0	0	0.01	0.1175	0.005	-4.55459	9.33578e-05	0.00784318
ncbi_101118402	0.12	0.12	0.19	0.21	0.28	0.38	0.32	0.53	0.16	0.3775	1.2384	9.44669e-05	0.00787408
ncbi_101103811	0.33	0.04	0.07	0.45	0.05	0.02	0.05	0.03	0.2225	0.0375	-2.56884	9.54592e-05	0.00787408
ncbi_101122809	0.1	0.38	0.29	0.32	0.1	0.05	0.11	0.07	0.2725	0.0825	-1.72379	9.5466e-05	0.00787408
ncbi_101106877	0.08	0.59	0.4	0.12	2.34	0.58	1.61	1.07	0.2975	1.4	2.23447	9.69e-05	0.00794795
ncbi_114109346	6.48	3.57	3.19	8.23	0.57	2.8	0.91	2.77	5.3675	1.7625	-1.60663	9.99704e-05	0.00803008
ncbi_114113983	0.12	1	0.92	0.66	0	71.24	47.28	37.77	0.675	39.0725	5.85512	0.000105729	0.00839238
ncbi_101115910	0.83	0.36	0.44	0.31	0.63	1.47	1.19	2.62	0.485	1.4775	1.6071	0.000109919	0.00862291
ncbi_105603910	2.04	3.94	3.27	3.31	0.68	1.65	2.04	0.61	3.14	1.245	-1.33462	0.000110385	0.00862291
ncbi_114116088	5.81	6.11	5.13	6.44	6.88	19.24	7.7	18.66	5.8725	13.12	1.15972	0.000113482	0.00877194
ncbi_100316848	0.2	0	0.75	0.28	0	0	0	0	0.3075	0.001	-8.26444	0.000115903	0.00886632
ncbi_443268	5.06	6.31	8.78	3.69	2.32	3.58	2.8	3.07	5.96	2.9425	-1.01827	0.000123244	0.00933119
ncbi_101122711	4.2	2.15	2.53	4.68	1.62	1.64	1.3	1.72	3.39	1.57	-1.11052	0.00012744	0.00959964
ncbi_101120047	0.93	1.1	1.04	0.8	1.07	2.62	1.84	2.23	0.9675	1.94	1.00372	0.000134462	0.0100262
ncbi_101104461	2.35	3.98	2.49	4.37	3.68	10.39	6.69	6	3.2975	6.69	1.02063	0.000136617	0.0101357
ncbi_101122170	0.28	0.86	0.53	0.6	0.3	0.21	0.27	0.25	0.5675	0.2575	-1.14005	0.000165381	0.01177
ncbi_101123642	0.87	1.36	0.9	0.87	0.17	0.51	0.29	0.51	1	0.37	-1.4344	0.000166132	0.01177
ncbi_114116943	1.12	0.72	0.82	0.87	0.47	0.64	0.33	0.22	0.8825	0.415	-1.08848	0.000166864	0.01177
ncbi_106990977	0.35	0.39	0.65	0.42	1.3	0.58	1.25	1.05	0.4525	1.045	1.20751	0.000176192	0.012009
ncbi_101109910	0.15	0.1	0.12	0.11	0.3	0.49	0.29	0.24	0.12	0.33	1.45943	0.000188406	0.0125866
ncbi_443547	20.58	59.58	57.4	10.27	9.62	3.35	7.71	3.45	36.9575	6.0325	-2.61504	0.000190423	0.0126108
ncbi_101118514	3.5	0.85	1.64	2.53	2.51	10.95	9.23	4.72	2.13	6.8525	1.68578	0.000191332	0.0126108
ncbi_101117509	0.36	0.42	0.33	0.13	0.76	0.65	1.37	0.72	0.31	0.875	1.49701	0.000196121	0.0126997
ncbi_101120326	2.15	1.88	2.98	0.7	0.21	0.82	0.65	0.8	1.9275	0.62	-1.63639	0.000206204	0.0131199
ncbi_101118074	0.07	0.28	0.22	0.04	0.18	0.94	1.56	2.01	0.1525	1.1725	2.94271	0.00020967	0.0132289
ncbi_101111551	0.12	0.17	0.17	0.14	0.23	0.7	0.49	0.36	0.15	0.445	1.56884	0.00021289	0.0133749
ncbi_101118378	0.2	0.39	0.3	0.23	0.36	1.79	0.55	1.04	0.28	0.935	1.73954	0.000214985	0.0134493
ncbi_443135	0.65	0.84	0.93	0.7	0.17	0.33	0.22	0.36	0.78	0.27	-1.53051	0.000228543	0.0141773
ncbi_105611998	0.72	8.6	7.87	1.98	0.66	0.68	0.77	1.68	4.7925	0.9475	-2.33858	0.000229669	0.0141876
ncbi_114117952	0.17	0.3	0.14	0.28	0.93	0.41	0.58	0.55	0.2225	0.6175	1.47263	0.000243059	0.0147727
ncbi_101103683	1.16	1.92	1.5	1.29	0.78	0.66	0.7	0.76	1.4675	0.725	-1.01731	0.000251782	0.0151727
ncbi_114114475	0.5	0.04	0.5	0.29	0	0	0	0.03	0.3325	0.0075	-5.47032	0.000270498	0.0161686
ncbi_114115555	1	0.66	0.71	0.5	5.81	2.51	0.78	10.88	0.7175	4.995	2.79943	0.0002718	0.0161809
ncbi_101120181	7.45	66.05	54.48	10.22	4.9	4.35	5.71	7	34.55	5.49	-2.65381	0.000295869	0.0172657
ncbi_101107064	1.81	107.6	89.62	1.76	2.83	0.72	1.81	2.98	50.1975	2.085	-4.5895	0.000314265	0.0180001
ncbi_101119165	12.7	19.72	12.24	16.29	14.11	60.04	26.92	32.37	15.2375	33.36	1.13049	0.000314551	0.0180001
ncbi_101115715	0	0	0	0	0.35	0.11	0.12	0	0.001	0.145	7.17991	0.000327315	0.0185158
ncbi_101112723	2.25	2.87	1.36	1.2	3.86	6	4.74	2.54	1.92	4.285	1.15819	0.000336355	0.0189127
ncbi_114115272	0.76	0.39	0.51	0.56	0.06	0.14	0.09	0.06	0.555	0.0875	-2.66513	0.000384507	0.0209479
ncbi_105605834	0.18	0.12	0.11	0.2	1.49	0.15	0.29	1.19	0.1525	0.78	2.35466	0.000393711	0.0212144
ncbi_101117966	0.23	0.26	0.27	0.29	0.52	0.49	0.7	0.74	0.2625	0.6125	1.22239	0.000415	0.021979
ncbi_101109707	0.07	0.06	0.05	0.15	0.14	0.4	0.24	0.31	0.0825	0.2725	1.72379	0.000422639	0.0222553
ncbi_101107315	1.28	0.55	1.17	1.08	1.1	3.56	3.29	2.33	1.02	2.57	1.3332	0.000423581	0.0222553
ncbi_101120411	0.27	0.17	0.32	0.38	0.06	0.05	0.01	0.11	0.285	0.0575	-2.30933	0.000439942	0.0225476
ncbi_101112518	26.13	70.09	69.53	20.24	21.33	15.72	23.73	25.8	46.4975	21.645	-1.10312	0.00044188	0.0225476
ncbi_101110254	514.17	312.63	390.54	505.42	237.3	178.49	327.91	112.04	430.69	213.935	-1.00948	0.000473036	0.0236742
ncbi_101103483	0.42	1.45	0.38	0.93	0.3	0.06	0.18	0	0.795	0.135	-2.558	0.000479885	0.0239359
ncbi_105608393	0.88	0.33	0.63	0.86	1	2.07	1.97	1.32	0.675	1.59	1.23607	0.000503173	0.0248099
MSTRG.15496	0.66	1.96	0.89	2.11	0.42	0.63	0.64	0.87	1.405	0.64	-1.13443	0.000525861	0.0256517
ncbi_114110487	5.95	2.65	6.67	5.84	1.64	2.37	3.63	1.14	5.2775	2.195	-1.26563	0.000526448	0.0256517
ncbi_101114988	0.71	0.18	0.3	0.85	1.46	0.84	2.93	1.07	0.51	1.575	1.62678	0.000551946	0.0266305
ncbi_780477	0.22	0.98	0.17	0.74	0.04	0.02	0.02	0.2	0.5275	0.07	-2.91374	0.000568478	0.0271619
ncbi_101111204	0.36	1.58	1.22	0.27	0.25	0.06	0.14	0.33	0.8575	0.195	-2.13666	0.000593459	0.0281731
ncbi_101108379	0.52	0.61	0.22	0.68	0.98	1.05	1.16	1.28	0.5075	1.1175	1.1388	0.00059608	0.0282068
ncbi_101115838	1.96	1.39	1.22	1.77	0.82	1.13	0.69	0.27	1.585	0.7275	-1.12346	0.000637903	0.0298984
ncbi_101108221	0.48	1.37	1.11	0.45	0.13	0.45	0.34	0.4	0.8525	0.33	-1.36923	0.000650755	0.0303084
ncbi_494547	0.47	2.98	1.68	1.09	0.69	0.5	0.53	0.51	1.555	0.5575	-1.47987	0.000719786	0.0324982
ncbi_114110327	142.03	0	0	214.71	0.17	0.13	0.31	0	89.185	0.1525	-9.19185	0.000741199	0.0332616
ncbi_101121828	0.09	0.29	0.33	0.12	0.25	1.06	0.59	0.65	0.2075	0.6375	1.61931	0.000758098	0.0338144
ncbi_101120098	0.06	0.25	0.05	0.37	0.01	0.08	0.02	0.01	0.1825	0.03	-2.60486	0.000768188	0.0340761
ncbi_101112990	0.71	1.5	1.48	0.8	0.28	0.62	0.3	0.78	1.1225	0.495	-1.18122	0.000863662	0.037258
ncbi_106990219	0.07	0.07	0.05	0.24	0.45	0.39	0.39	0.73	0.1075	0.49	2.18845	0.000872386	0.0373331
ncbi_114113811	0.83	1.1	0.23	1.94	0.22	0.18	0.15	0.46	1.025	0.2525	-2.02127	0.000928229	0.0390438
ncbi_105612706	0.77	1.1	1.22	0	0.04	0	0	0	0.7725	0.01	-6.27146	0.000956385	0.0396631
ncbi_101103462	0.85	0.2	0.14	0.64	0	0.15	0.03	0	0.4575	0.045	-3.34577	0.000996043	0.0403621
ncbi_101113322	0.05	0.02	0.01	0.01	0.1	0.14	0.14	0.08	0.0225	0.115	2.35364	0.000996601	0.0403621
ncbi_101118069	0.1	0.37	0.3	0.05	0.02	0	0.02	0.05	0.205	0.0225	-3.18763	0.00101416	0.04091
ncbi_101119218	90.93	73.67	113.53	52.66	239.94	91.92	156.92	197.29	82.6975	171.518	1.05244	0.00106244	0.0421505
ncbi_101111869	0.13	0.14	0.03	0.14	0.02	0	0	0	0.11	0.005	-4.45943	0.00106519	0.0421505
ncbi_101102194	1.4	1.04	1.59	0.92	0.81	0.75	0.51	0.37	1.2375	0.61	-1.02055	0.00106917	0.0421505
ncbi_101114023	0.21	0.2	0.13	0.3	0.06	0.08	0.03	0.09	0.21	0.065	-1.69188	0.00107843	0.0422275
ncbi_101104473	3.09	5.05	6.28	2.1	2.09	1.43	2.54	1.41	4.13	1.8675	-1.14503	0.001084	0.0422275
ncbi_101111972	0.57	0.17	0.57	0.26	0.18	0.04	0.12	0.15	0.3925	0.1225	-1.67991	0.0010947	0.0425011
ncbi_101113485	0.97	0.85	1.09	1.01	0.48	0.56	0.23	0.63	0.98	0.475	-1.04485	0.00111795	0.0430009
ncbi_101109565	0.15	0.3	0.16	0.09	0.17	0.58	0.98	0.19	0.175	0.48	1.45568	0.00114928	0.0438448
ncbi_101116417	0.17	0.2	0.17	0.19	0.37	0.65	0.3	0.48	0.1825	0.45	1.30203	0.00117745	0.0445325
ncbi_101118143	0.21	0.07	0.45	0.07	0.02	0	0.04	0.07	0.2	0.0325	-2.62149	0.0012248	0.0457796
ncbi_101104483	1.95	1.36	2	0.85	1.73	6.61	3.3	2.89	1.54	3.6325	1.23803	0.00127681	0.0474831
ncbi_101119747	0.38	0.46	0.51	0.23	1.56	0.44	0.75	1.15	0.395	0.975	1.30355	0.0012848	0.0476602
ncbi_101120090	0.09	0.08	0.05	0.17	0.13	0.55	0.38	0.33	0.0975	0.3475	1.83354	0.00131934	0.0484052
ncbi_101120619	0.78	1.04	1.16	0.77	0.54	0.25	0.12	0.48	0.9375	0.3475	-1.43181	0.00137819	0.0498715

## Sheet: 3.5 y vs 6 y
DEGs in 3.5 y vs 6 y
id	C-1_fpkm	C-2_fpkm	C-3_fpkm	C-4_fpkm	D-1_fpkm	D-2_fpkm	D-3_fpkm	D-4_fpkm	C_mean	D_mean	log2(fc)	PValue	FDR	Symbol
ncbi_101120765	23.86	22.4	26.23	26.34	74.73	82.86	95.65	79.77	24.7075	83.2525	1.75254	2.16308e-44	2.97164e-40	KLHL21
ncbi_101119737	0.99	1.34	0.93	1.43	4.35	5.68	5.42	6.46	1.1725	5.4775	2.22393	2.87863e-36	1.97733e-32	NPTX1
ncbi_101120031	1.87	1.51	2.35	1.9	0.13	0.1	0.04	0.08	1.9075	0.0875	-4.44626	1.40908e-29	6.45264e-26	ADAMTS8
ncbi_101104340	3.44	7.83	5.77	6.57	1.2	1.09	1.25	1.19	5.9025	1.1825	-2.31949	6.51296e-23	2.23688e-19	RELT
ncbi_101113965	0.77	0.82	0.78	0.93	5.69	11.2	3.02	10.34	0.825	7.5625	3.1964	1.42613e-19	3.91842e-16	Ubd
ncbi_101105771	2.01	2.98	3.39	2.35	5.92	9.02	8.1	7.4	2.6825	7.61	1.50432	2.28381e-17	5.22915e-14	BANP
ncbi_101112614	7.5	9.97	7.82	8.07	3.26	3.15	3.24	4.06	8.34	3.4275	-1.28289	6.59484e-17	1.29428e-13	KCNN3
ncbi_101117496	6.9	8.41	5.75	7.03	17.45	14.97	23.8	14.31	7.0225	17.6325	1.32818	1.15483e-16	1.98313e-13	ASB4
ncbi_101107483	6.81	8.09	6.61	6.66	11.64	17.17	18.58	14.71	7.0425	15.525	1.14043	2.6665e-15	4.07027e-12	TRIM45
ncbi_100329218	35.75	40.33	43.74	35.04	19.65	17.28	19.06	15.82	38.715	17.9525	-1.10871	3.03378e-15	4.16781e-12	SREBF1
ncbi_105613621	0	0	0	0	1.13	0.34	0.43	1.57	0.001	0.8675	9.76072	4.90593e-13	5.18443e-10	SNU13
ncbi_101114961	7.38	11.29	11.66	8.4	4.29	4.24	4.28	3.95	9.6825	4.19	-1.20843	1.87155e-12	1.71409e-09	ARHGEF40
ncbi_101114059	219.84	151.02	166.94	183.44	385.54	383.85	440.85	360.33	180.31	392.642	1.12274	2.14393e-12	1.84083e-09	ASB2
ncbi_101115970	19.18	30.4	13.18	27.86	47.44	58.12	61.11	54.98	22.655	55.4125	1.29038	8.26569e-12	5.88769e-09	SESN1
ncbi_100422803	6.77	27.56	12.72	25.79	5.09	3.55	4.79	4.08	18.21	4.3775	-2.05655	9.45168e-12	6.1832e-09	Pitx3
ncbi_101120358	17.15	24.92	26.92	19.92	10.43	9.16	10.32	8.64	22.2275	9.6375	-1.20561	1.22015e-11	7.61928e-09	SLC25A1
ncbi_101110429	10.48	12.16	11.48	10.55	4.98	5.97	4.87	5.82	11.1675	5.41	-1.04561	1.5168e-11	8.6824e-09	P2RX5
ncbi_101114607	180.27	356.79	387.69	264.75	101.32	92.89	61.78	110.06	297.375	91.5125	-1.70024	3.4124e-11	1.80306e-08	NMRK2
ncbi_114110441	0.06	0	0.03	0.09	0.38	2.08	1.22	2.57	0.045	1.5625	5.11779	4.06906e-11	2.0704e-08	NPC1
ncbi_101112153	8.87	6.81	7.33	9.97	12.97	32.31	26.33	25.14	8.245	24.1875	1.55267	6.72671e-11	3.30041e-08	FOXS1
ncbi_101122152	3.76	4.07	3.57	4.93	1.26	1.27	1.18	0.52	4.0825	1.0575	-1.9488	8.34611e-11	3.8828e-08	NANOS1
ncbi_101121294	5.62	6.02	6.12	5.08	10.06	11.33	15.98	9.56	5.71	11.7325	1.03895	8.47897e-11	3.8828e-08	Abhd18
ncbi_101103913	6.27	7.4	7.01	7.83	2.86	3.68	3.9	3.21	7.1275	3.4125	-1.06257	1.03779e-10	4.59907e-08	PMEPA1
ncbi_100568292	1.11	1.69	0.59	1.72	2.52	6.77	6.67	4.37	1.2775	5.0825	1.99222	2.13685e-10	9.17377e-08	DRD1
ncbi_101107740	110.53	287.85	281.42	189.21	46.04	85.83	64.15	56.32	217.252	63.085	-1.784	2.3651e-10	9.64718e-08	LMCD1
ncbi_101102380	21.12	37.07	28.72	27.73	12.18	15.1	12.04	13.29	28.66	13.1525	-1.1237	2.38757e-10	9.64718e-08	Mat2a
ncbi_101104593	5.07	12.22	7.51	8.33	2.63	2.93	3.03	3.44	8.2825	3.0075	-1.4615	3.83661e-10	1.46409e-07	Enah
ncbi_100885768	7.63	13.89	10.55	6.7	4.06	1.98	3.62	2.67	9.6925	3.0825	-1.65277	7.58542e-10	2.67201e-07	TFRC
ncbi_101118797	109.11	223.75	183.39	184	79.08	62.16	54.7	78.41	175.062	68.5875	-1.35185	8.6196e-10	2.9604e-07	SLC2A4
ncbi_101122350	7.49	12.73	10.33	11.18	5.49	4.44	4.29	4.49	10.4325	4.6775	-1.15728	1.05187e-09	3.52455e-07	WDR91
ncbi_101107974	7.27	19.14	20.22	8.96	4.7	3.31	3.15	4.14	13.8975	3.825	-1.86129	1.5665e-09	4.78234e-07	SPECC1
MSTRG.8967	0.21	0.2	0.15	0.02	0.43	2.23	0.91	2.62	0.145	1.5475	3.41581	5.17043e-09	1.36599e-06	FKBP5
ncbi_101117080	3.74	4.11	4.6	4.44	1.77	2.39	1.88	2.09	4.2225	2.0325	-1.05484	6.88024e-09	1.78341e-06	STON2
ncbi_101108867	6.84	3.71	5.26	2.59	27.44	11.89	11.06	17.16	4.6	16.8875	1.87625	9.19723e-09	2.2973e-06	IER3
ncbi_101110341	0.77	1.05	0.53	0.95	1.37	1.81	2.2	2.2	0.825	1.895	1.19973	9.85159e-09	2.41681e-06	HAS2
ncbi_101106106	3.09	2.58	3.13	2.12	5.88	4.01	6.06	5.94	2.73	5.4725	1.0033	1.42215e-08	3.36853e-06	PGM2L1
ncbi_101116013	0.46	0.5	0.46	0.46	1.03	1.17	1.32	1.13	0.47	1.1625	1.3065	1.54854e-08	3.60574e-06	GRAMD1C
ncbi_101108086	35.59	21.66	28.53	29.88	66.4	82.11	56.13	53.35	28.915	64.4975	1.15743	1.73798e-08	3.9794e-06	Hist1h2bc
ncbi_101102266	17.91	32.41	26.88	22.79	13.74	10.64	12.48	10.67	24.9975	11.8825	-1.07295	1.85363e-08	4.17462e-06	RNF34
ncbi_101105498	1.38	2.02	1.45	1.85	0.47	0.7	0.82	0.42	1.675	0.6025	-1.47513	2.14678e-08	4.61652e-06	ARL10
ncbi_101115993	10.55	14.66	13.95	11.05	7.09	4.85	4.48	3.63	12.5525	5.0125	-1.32437	2.15066e-08	4.61652e-06	DET1
ncbi_100642179	1.82	2.2	2.15	2.23	1.08	0.73	0.9	0.68	2.1	0.8475	-1.3091	2.80272e-08	5.92365e-06	SLC22A3
ncbi_101115230	39.95	21.04	33.24	26.78	70.23	73.5	55.09	74.46	30.2525	68.32	1.17525	3.1102e-08	6.47393e-06	ubq-1
ncbi_101109022	1.46	4.54	3.55	3	1.05	0.9	1.2	0.95	3.1375	1.025	-1.61399	3.61313e-08	7.38834e-06	ESRRB
ncbi_101110963	13.84	16.2	15.1	17.23	4.32	8.63	7.56	6.01	15.5925	6.63	-1.23377	4.80804e-08	9.57288e-06	PVR
ncbi_101122511	0.19	0	0	0	31.98	27.64	40.29	29.91	0.0475	32.455	9.4163	5.697e-08	1.07213e-05	TMBIM6
ncbi_101110829	3.98	3.4	4.11	2.73	1.38	1.41	1.42	1.35	3.555	1.39	-1.35476	6.5923e-08	1.20753e-05	Six2
ncbi_114114041	2.03	2.89	1.99	1.74	0.29	0.78	0.56	0.69	2.1625	0.58	-1.89858	8.29307e-08	1.49908e-05	MRPS35
MSTRG.15413	2.21	3	2.18	2.51	0.97	1.2	1.6	0.9	2.475	1.1675	-1.08401	1.05912e-07	1.84179e-05	--
ncbi_101108768	8.19	16.16	12.01	9.62	6.2	3.79	4.95	4.77	11.495	4.9275	-1.22208	1.40165e-07	2.31998e-05	FITM2
ncbi_101122544	1.75	1.59	2.31	1.68	3.21	4.8	3.11	5.73	1.8325	4.2125	1.20086	1.54682e-07	2.5249e-05	OSGIN1
ncbi_101109057	32.07	71.87	76.8	48.53	18.01	25.1	15.93	24.64	57.3175	20.92	-1.45409	1.56221e-07	2.5249e-05	ANKRD2
ncbi_101109885	2.02	3.15	2.18	2.64	1.16	1.31	0.98	1.11	2.4975	1.14	-1.13145	2.00074e-07	3.19606e-05	ANKRD6
ncbi_105610011	0.18	0.21	0.15	0.3	0.04	0.07	0.02	0.07	0.21	0.05	-2.07039	2.39866e-07	3.66142e-05	USH2A
ncbi_114108638	0.76	0.46	0.39	0.24	1.65	2	3.73	0.82	0.4625	2.05	2.1481	3.48117e-07	4.9817e-05	AP5Z1
ncbi_101112558	3.15	5.55	3.43	5.35	0.82	2.11	1.53	1.63	4.37	1.5225	-1.52119	4.66243e-07	6.15889e-05	IFRD1
ncbi_101105932	1.11	1.68	0.81	0.63	6.41	1.88	2.97	3.02	1.0575	3.57	1.75527	4.73994e-07	6.20165e-05	TVP23B
MSTRG.17928	2.63	4.93	4.03	4.22	1.5	1.61	2.08	1.16	3.9525	1.5875	-1.31601	4.85218e-07	6.2886e-05	JUP
ncbi_101103594	2.31	3.23	3.14	2.53	1.42	1.08	1.44	1.37	2.8025	1.3275	-1.078	5.52004e-07	6.83192e-05	FICD
ncbi_101108489	1.86	1.21	0.81	1.49	2.44	6.45	2.58	6.14	1.3425	4.4025	1.7134	5.64419e-07	6.92321e-05	CXCL9
ncbi_106991529	13.51	7.86	9.85	11.3	14.3	32.24	25.22	25.6	10.63	24.34	1.19519	6.66194e-07	7.95841e-05	IRF4
ncbi_101119773	0.76	0.4	0.85	0.65	1.15	2.87	1.48	2.85	0.665	2.0875	1.65035	6.9496e-07	8.18203e-05	GBP7
ncbi_114118760	0.82	1.42	1.4	1.06	0.3	0.47	0.37	0.29	1.175	0.3575	-1.71665	8.81091e-07	0.00010087	UBE2QL1
ncbi_101105683	0.63	0.94	0.93	0.99	0.3	0.28	0.31	0.33	0.8725	0.305	-1.51635	8.88931e-07	0.000100927	Ccdc114
ncbi_101110925	715.5	553.2	1094.56	444.51	296.21	198.91	137.51	287.54	701.942	230.042	-1.60945	9.09132e-07	0.000102374	Myl6b
ncbi_101120676	12.87	13.88	16.1	12.76	8.54	4.94	7.47	5.75	13.9025	6.675	-1.0585	9.75142e-07	0.000108036	MIEF2
ncbi_101115780	1.94	2.01	1.91	1.79	0.65	0.7	1	0.63	1.9125	0.745	-1.36015	9.88254e-07	0.000108613	METTL1
ncbi_101119224	0.73	1.01	1.05	0.97	0.33	0.4	0.33	0.51	0.94	0.3925	-1.25997	1.13835e-06	0.000124116	BEND3
ncbi_101107690	7.41	23.21	21.74	10.32	5.26	5.47	6.55	4.59	15.67	5.4675	-1.51905	1.32717e-06	0.000140251	HK2
ncbi_114113264	96.27	208.34	166.23	150.92	43.89	75.82	44.59	81.37	155.44	61.4175	-1.33964	1.91286e-06	0.000193226	HSPB7
ncbi_101112051	0.33	0.43	0.29	0.54	0.84	2.1	1.01	1.43	0.3975	1.345	1.75858	2.08717e-06	0.000204811	GIMAP1
ncbi_105608992	0.99	1.56	1.16	1.12	0.61	0.6	0.56	0.58	1.2075	0.5875	-1.03936	2.10467e-06	0.000205063	MSANTD3
ncbi_101117733	1.62	0.71	0.89	0.95	2.61	1.67	2.56	1.63	1.0425	2.1175	1.02231	2.36284e-06	0.000228596	DUSP19
ncbi_101113706	5.32	6.48	6.47	5.73	3.08	3.9	2.41	2.47	6	2.965	-1.01693	2.39835e-06	0.000230409	TMEM63B
ncbi_443154	12.66	27.52	18.87	23.44	6.35	11.21	9.06	9.1	20.6225	8.93	-1.20749	2.51767e-06	0.000239448	HYAL2
ncbi_101110457	5.06	4.27	3.64	4.18	10.41	10.29	7.83	7.07	4.2875	8.9	1.05367	2.71226e-06	0.000252774	Hist1h2bc
ncbi_101110067	1.31	3.33	1.58	1.51	2.39	4.68	5.66	4.19	1.9325	4.23	1.13019	2.93779e-06	0.000267281	REV3L
ncbi_101108953	3.82	6.76	3.51	6.25	1.28	2.5	1.91	2.21	5.085	1.975	-1.3644	3.13327e-06	0.000276388	PDE4D
ncbi_101114109	1.21	2.56	1.9	1.74	0.8	0.9	0.98	0.75	1.8525	0.8575	-1.11126	3.13849e-06	0.000276388	Lsm11
ncbi_101105455	3.96	4.33	4.35	5.97	2.65	2.06	1.63	1.95	4.6525	2.0725	-1.16663	3.28157e-06	0.000285331	CD248
ncbi_101102456	0.09	0.02	0.06	0.02	0.15	0.28	0.25	0.22	0.0475	0.225	2.24393	3.42256e-06	0.000295718	SLC24A2
ncbi_101104254	0.11	0.36	0.3	0.28	0.04	0.11	0.06	0.05	0.2625	0.065	-2.01381	3.59072e-06	0.000306394	DNAH2
ncbi_101111384	13.52	19.51	16.77	16.93	9.18	7.91	5.96	10.2	16.6825	8.3125	-1.00498	3.78989e-06	0.000315549	HM13
ncbi_101119210	4.34	7.55	8.39	4.85	3.02	2.73	3.08	3.08	6.2825	2.9775	-1.07724	4.095e-06	0.000334864	ADAMTSL5
ncbi_101122203	1.1	0.38	0.85	0.5	1.94	2.24	2.05	1.48	0.7075	1.9275	1.44593	4.26896e-06	0.000341698	Armc7
ncbi_101120039	3.98	12.68	6.63	7.96	2.56	2.06	1.04	3.55	7.8125	2.3025	-1.76258	4.79309e-06	0.000374133	DPH3
ncbi_101122326	10.95	15.78	12.76	10.23	7.5	4.22	6.93	5.37	12.43	6.005	-1.04959	4.96896e-06	0.00038567	PSMD5
ncbi_101122452	12.41	23.51	17.19	18.97	7.55	9.54	4.56	9.01	18.02	7.665	-1.23324	5.24911e-06	0.000402862	SLC16A5
ncbi_101118461	0.52	0.2	0.49	0.46	0.88	1.4	1.01	1.19	0.4175	1.12	1.42365	5.42937e-06	0.000409828	KIF18B
ncbi_101117554	26.51	57.04	53.98	51.7	10.92	24.61	11.26	21.34	47.3075	17.0325	-1.47378	5.94448e-06	0.000441434	TNFRSF12A
ncbi_101106528	1.13	2.07	1.56	1.38	2.44	5.73	2.9	2.79	1.535	3.465	1.17462	6.33021e-06	0.000457708	TRDC
ncbi_105601856	11.48	20.7	18.41	11.23	8.6	6.91	7.47	5.78	15.455	7.19	-1.10401	7.01051e-06	0.000497494	RDH14
ncbi_101115910	0.63	1.47	1.19	2.62	0.03	0.25	0.08	0.2	1.4775	0.14	-3.39966	7.10906e-06	0.000499085	BTBD7
ncbi_114116052	9.2	14.06	9.17	7.77	3.5	0.88	0.97	2.36	10.05	1.9275	-2.38239	8.02193e-06	0.000545571	SENP6
ncbi_105608622	8.8	3.53	4.41	5	10.4	17.93	9.75	16.44	5.435	13.63	1.32643	8.11691e-06	0.000549311	CCT4
ncbi_114113811	0.22	0.18	0.15	0.46	0.44	2.41	3.03	0.64	0.2525	1.63	2.69052	8.52847e-06	0.000571532	ABCC9
ncbi_101104065	1.87	3.87	3.13	4.03	3.93	7.63	5.6	9.1	3.225	6.565	1.0255	8.69145e-06	0.000576827	KANK3
ncbi_780465	1.23	4.43	3	3.17	1.14	1.29	1.34	0.9	2.9575	1.1675	-1.34096	8.92068e-06	0.000589194	NOD2
ncbi_101112356	0.02	0.02	0	0.02	0.11	0.17	0.19	0.12	0.015	0.1475	3.29768	9.54458e-06	0.000624397	HIST1H1T
ncbi_101112936	0.65	0.7	0.62	0.96	1.1	2.19	1.42	2.18	0.7325	1.7225	1.2336	1.04955e-05	0.000667531	IFI16
ncbi_101121360	87.98	85.23	102.69	67.54	38.7	53.29	30.56	42.01	85.86	41.14	-1.06144	1.06946e-05	0.000676062	RPL23
ncbi_101115318	1.89	3.76	4.41	3.73	1.22	1.05	0.98	1.73	3.4475	1.245	-1.4694	1.10428e-05	0.000680295	RRP9
ncbi_100302083	115.92	134.51	121.08	154.33	27.3	76.3	38.94	64.04	131.46	51.645	-1.34792	1.14291e-05	0.000700949	CDKN1A
ncbi_101123648	3.7	2.59	3.56	4.07	1.26	1.97	1.45	1.76	3.48	1.61	-1.11203	1.15181e-05	0.000701283	ARHGAP23
MSTRG.15496	0.42	0.63	0.64	0.87	0.64	2.85	1.33	2.05	0.64	1.7175	1.42417	1.15366e-05	0.000701283	--
ncbi_101121563	0.43	0.54	0.5	0.44	1.18	1.08	0.77	1.39	0.4775	1.105	1.21047	1.19523e-05	0.000723352	CYP2J2
ncbi_443535	1.65	1.6	1.61	1.86	0.52	0.95	0.81	0.81	1.68	0.7725	-1.12085	1.23911e-05	0.0007403	LDLR
ncbi_101109670	0.95	1.17	1.57	1.19	0.61	0.28	0.53	0.54	1.22	0.49	-1.31603	1.34617e-05	0.000795004	Uck2
ncbi_101103525	2.2	5.93	4.19	4.71	1.24	2.24	1.71	1.83	4.2575	1.755	-1.27854	1.35642e-05	0.000795004	ABCG1
ncbi_101114751	4.45	10.85	4.44	8.06	2.1	2.82	3.24	3.08	6.95	2.81	-1.30644	1.44708e-05	0.0008318	TM2D2
ncbi_101108694	2.26	3.59	3.16	2.44	1.72	0.9	1.46	1.37	2.8625	1.3625	-1.07102	1.49739e-05	0.000850049	PDE12
ncbi_101121275	6.07	3.34	3.82	3.17	12.39	8.45	5.06	14.02	4.1	9.98	1.28342	1.55449e-05	0.000875229	NKIRAS2
ncbi_101107090	1.9	3.89	3.54	3.63	1.04	1.65	1.78	1.35	3.24	1.455	-1.15497	1.66086e-05	0.000931089	RFX2
ncbi_101118481	0.07	57.21	57.12	0.17	0.12	0.14	0.15	0	28.6425	0.1025	-8.12639	1.66726e-05	0.000931089	RPL5
ncbi_101110185	8.88	4.71	5.84	7.26	16.42	14.3	12.07	12.06	6.6725	13.7125	1.03919	1.7052e-05	0.000948424	Hist1h2bc
ncbi_101116361	5.36	19.18	13.41	8.79	4.38	4.72	3.74	4.89	11.685	4.4325	-1.39847	1.72012e-05	0.000949034	Rnf115
ncbi_101121228	0.74	0.56	0.8	0.78	1.19	1.84	1.39	1.76	0.72	1.545	1.10154	1.96956e-05	0.00106109	2022-09-01
ncbi_101110090	1	1.61	1.82	1.64	0.8	0.75	0.59	0.52	1.5175	0.665	-1.19027	2.01708e-05	0.00108245	TPPP
ncbi_106991578	4.79	4.25	3.13	4.16	0.93	2.07	0.93	2.1	4.0825	1.5075	-1.43729	2.14168e-05	0.0011404	MAF
ncbi_101112919	1.38	1.93	1.72	1.65	0.94	0.71	0.5	0.82	1.67	0.7425	-1.16939	2.27011e-05	0.00119949	CCM2L
ncbi_105609087	3.97	5.4	5.03	4.73	1.44	2.5	2.34	2.75	4.7825	2.2575	-1.08304	2.32553e-05	0.00121476	ZNF774
ncbi_101121535	2.98	2.26	1.81	3.24	1.27	1.28	1.04	1.28	2.5725	1.2175	-1.07925	2.42703e-05	0.00125348	KCNB1
ncbi_101111757	3.42	3.24	2.96	2.45	1.7	1.1	1.68	1.53	3.0175	1.5025	-1.00599	2.5155e-05	0.00128948	PDE4B
ncbi_101122635	1.31	1.46	1.97	0.99	0.48	0.56	0.3	0.61	1.4325	0.4875	-1.55506	2.79044e-05	0.00140421	ABHD6
ncbi_101108683	0.95	1.37	1.2	1.23	0.78	0.39	0.45	0.49	1.1875	0.5275	-1.17068	3.04282e-05	0.00150368	TUB
ncbi_101105335	5.11	6.24	6.24	4.75	3.76	1.84	2.69	2.64	5.585	2.7325	-1.03134	3.28096e-05	0.00160405	TSPYL4
ncbi_101103462	0	0.15	0.03	0	0.19	0.83	1.85	0.23	0.045	0.775	4.1062	3.29432e-05	0.00160487	MGST1
ncbi_105605903	0	0	0	0	0.19	0.24	0.64	0	0.001	0.2675	8.0634	4.75255e-05	0.00216194	ADH4
ncbi_101104176	4.69	5.78	7.49	5.29	3.58	1.88	2.8	2.87	5.8125	2.7825	-1.06278	5.16576e-05	0.00230413	COA4
ncbi_101121283	15.39	16.08	17.65	14.39	6.94	9.25	7.14	8.34	15.8775	7.9175	-1.00387	5.51021e-05	0.00240301	Dlgap4
ncbi_114108606	0.47	0.75	0.56	0.35	0.04	0.06	0.16	0.14	0.5325	0.1	-2.41278	5.97632e-05	0.00256571	SLC2A5
ncbi_101107085	0.78	2.18	0.97	1.23	0.42	0.53	0.6	0.64	1.29	0.5475	-1.23644	6.56902e-05	0.00277677	Mief1
ncbi_101106998	2.48	3.27	2.95	3.74	1.81	1.48	0.97	1.45	3.11	1.4275	-1.12342	6.63042e-05	0.00279413	ARMCX6
ncbi_101106663	8	19.19	15.03	12.49	7.83	4.69	7.19	6.69	13.6775	6.6	-1.05127	6.70276e-05	0.0028074	KLHL34
ncbi_101104226	0.13	0.21	0.14	0.37	0.38	0.81	0.51	0.67	0.2125	0.5925	1.47935	6.82268e-05	0.00283172	C3AR1
ncbi_101123292	2.1	1.31	3.39	3.34	5.58	6.98	4.71	4.42	2.535	5.4225	1.09697	7.06561e-05	0.00287931	HIST3H2A
ncbi_101112535	0.35	0.53	0.46	0.34	0.11	0.18	0.12	0.1	0.42	0.1275	-1.71989	7.09712e-05	0.00287931	DZIP1L
MSTRG.5097	8.86	2.8	5.26	3.97	9.9	13.33	12.49	11.89	5.2225	11.9025	1.18845	7.10501e-05	0.00287931	PABPC1
ncbi_101113122	0.07	0.03	0.01	0.06	0.04	0.77	0.11	0.91	0.0425	0.4575	3.42824	7.89844e-05	0.00312705	CD5L
ncbi_101111237	0.04	0.04	0.03	0.04	0.07	0.24	0.2	0.18	0.0375	0.1725	2.20163	8.44187e-05	0.00328539	Gak
ncbi_114113036	2.51	2.31	3.55	2.28	7.83	3.88	5.22	4.38	2.6625	5.3275	1.00068	9.54646e-05	0.00366339	CHCHD2
ncbi_101106810	3.43	5.95	5.45	4.36	1.69	2.86	1.68	2.29	4.7975	2.13	-1.17143	0.000105087	0.00395531	CRABP2
ncbi_101107055	1.96	2.11	2.25	2.63	0.78	1.26	0.79	0.91	2.2375	0.935	-1.25885	0.00011197	0.00411297	ENSA
ncbi_101106898	7.19	4.2	6.27	4.06	2.68	2.39	2.11	2.77	5.43	2.4875	-1.12626	0.00011645	0.00424349	POPDC2
ncbi_101104483	1.73	6.61	3.3	2.89	1.14	0.62	2.09	1.01	3.6325	1.215	-1.58001	0.000118771	0.00429343	PRKAG2
ncbi_101103653	4.21	10.86	8.63	6.76	4.52	2.56	2.5	3.26	7.615	3.21	-1.24627	0.00012005	0.00430612	WDYHV1
ncbi_101118482	0.23	0.14	0.15	0.16	0.36	0.59	0.26	0.43	0.17	0.41	1.27009	0.000127165	0.00449098	CXCR6
ncbi_101115503	0.37	0.5	0.6	0.48	0.08	0.16	0.19	0.18	0.4875	0.1525	-1.67659	0.000130133	0.0045723	Mlxipl
ncbi_101105779	15.02	53.16	31.56	28.9	15.35	13.23	16.16	13.91	32.16	14.6625	-1.13314	0.000133378	0.00465063	PPTC7
ncbi_101118179	0.01	0.01	0.01	0.01	0.04	0.05	0.09	0.03	0.01	0.0525	2.39232	0.000158038	0.00534762	GRIN2B
ncbi_101119069	18.42	60.16	36.44	34.21	15.45	17.63	17.23	19.89	37.3075	17.55	-1.08799	0.000159848	0.00539557	Tp53inp2
ncbi_100034669	0.89	1.26	0.68	0.88	1.4	2.19	2.9	1.65	0.9275	2.035	1.13361	0.000170916	0.00564433	TAC1
ncbi_101113899	24.54	62.67	68.36	35.39	24.69	22	21.1	20.93	47.74	22.18	-1.10594	0.00018826	0.00611421	MSRB1
ncbi_101104939	0.82	1.69	0.61	0.35	0.39	0.09	0.22	0.15	0.8675	0.2125	-2.0294	0.000194163	0.00626154	PAQR8
ncbi_101116585	8.29	18.91	15.37	15.98	7.6	4.18	9.54	6.22	14.6375	6.885	-1.08814	0.000197776	0.00636312	ANKRD10
ncbi_100180629	11.13	21.51	21.55	14.51	11.06	7.36	6.44	7.71	17.175	8.1425	-1.07677	0.00021213	0.00668406	TSPAN9
ncbi_101118587	0.44	0.75	0.58	0.33	0.24	0.14	0.22	0.16	0.525	0.19	-1.46632	0.000213829	0.00672214	GK
ncbi_114108752	3.27	4.91	3.19	4.01	1.83	0.23	0.84	1.78	3.845	1.17	-1.71648	0.000214779	0.00673662	SENP6
ncbi_101122463	3.26	2.55	2.83	2.6	1.09	1.1	0.58	1.25	2.81	1.005	-1.48337	0.000223439	0.00693545	SELENOH
ncbi_101121054	2.41	4.83	4.82	3.41	1.82	1.9	1.96	1.73	3.8675	1.8525	-1.06193	0.000223643	0.00693545	EEF1AKMT4-ECE2
ncbi_105612179	1.3	2.42	1.55	2.06	0.75	1.14	1.13	0.63	1.8325	0.9125	-1.00592	0.000226379	0.00699491	Kbtbd11
ncbi_101113711	0.2	0.58	0.27	0.48	0.1	0.1	0.08	0.14	0.3825	0.105	-1.86507	0.000246237	0.00747583	RIN1
ncbi_100147785	1.44	3.88	4.45	2.36	0.95	0.92	0.88	1.13	3.0325	0.97	-1.64445	0.000247448	0.00748775	SLC25A15
ncbi_101109227	1.12	0.64	1.31	1.08	2.07	2.24	2.57	1.52	1.0375	2.1	1.01728	0.000250608	0.0075397	SAMD13
ncbi_101108445	8.78	18.24	11.47	9.14	3.78	7.03	7.43	4.18	11.9075	5.605	-1.08708	0.00026076	0.00775882	CCT6A
ncbi_101117811	1.81	2.85	3.98	2.75	1.02	1.38	1.03	0.88	2.8475	1.0775	-1.40201	0.000262087	0.00777657	THOC6
ncbi_101114719	3.91	4.77	3.56	3.27	2	1.86	1.6	1.43	3.8775	1.7225	-1.17062	0.000346668	0.00960186	PRELID3B
ncbi_101114080	0.19	0.18	0.13	0.24	0.34	0.49	0.4	0.32	0.185	0.3875	1.06667	0.000360248	0.00989816	HUNK
ncbi_100196905	0.19	0.12	0.16	0.24	0.34	0.3	0.47	0.48	0.1775	0.3975	1.16314	0.000361472	0.00991198	COL2A1
ncbi_101112723	3.86	6	4.74	2.54	2.32	1.7	2.33	2.1	4.285	2.1125	-1.02034	0.00037028	0.00998583	TIGAR
ncbi_780477	0.04	0.02	0.02	0.2	0.13	0.64	0.66	0.52	0.07	0.4875	2.79998	0.00037115	0.00998583	CLDN4
ncbi_101108307	1.23	2.29	2.23	2.21	0.78	1.33	0.9	0.73	1.99	0.935	-1.08973	0.000394928	0.0104337	Col23a1
ncbi_101112976	2.09	2.15	1.44	2.59	0.73	1.22	0.97	1.04	2.0675	0.99	-1.06239	0.00040011	0.01051	CREB5
ncbi_101110522	0.97	1.69	1.61	1.17	0.62	0.24	0.82	0.43	1.36	0.5275	-1.36636	0.000404317	0.0105199	PIGW
ncbi_101123070	3.96	16.15	11.12	9.49	4.72	4.26	5.06	4.15	10.18	4.5475	-1.16259	0.000414126	0.0107345	TMEM120B
ncbi_101108508	0.19	1.93	0.14	2.09	0.07	0.2	0.25	0.06	1.0875	0.145	-2.90689	0.000444454	0.0114343	DBNDD1
ncbi_101110725	0.49	0.53	0.46	0.68	0.71	1.68	0.95	1.39	0.54	1.1825	1.13081	0.00045494	0.0115881	LAT
ncbi_114117353	3.02	4.94	4.63	6.59	2.18	1.76	1.74	2.59	4.795	2.0675	-1.21364	0.000456274	0.0115881	ENAH
ncbi_101112877	0.76	2	1.75	2.67	0.55	0.9	0.38	0.7	1.795	0.6325	-1.50485	0.000477953	0.0120479	CHST3
ncbi_101105810	1.15	1.28	0.74	1.49	1.53	3.73	1.4	3.47	1.165	2.5325	1.12023	0.00048099	0.0120788	GIMAP4
ncbi_101119218	239.94	91.92	156.92	197.29	73.27	83.65	61	97.62	171.518	78.885	-1.12053	0.000486582	0.0121648	CILP
ncbi_101103714	0.36	0.48	0.6	0.25	0.92	0.49	0.6	1.76	0.4225	0.9425	1.15754	0.000494525	0.012241	Clec2h
ncbi_106990358	0.05	0.01	0.08	0.01	0.09	0.36	0.12	0.18	0.0375	0.1875	2.32193	0.00050782	0.0124136	--
ncbi_101122247	0.32	0.32	0.31	0.34	0.36	0.9	0.76	0.59	0.3225	0.6525	1.01668	0.000556803	0.0132571	APOBR
ncbi_101108476	1.54	1.88	1.67	1.13	0.79	0.8	0.54	0.93	1.555	0.765	-1.02338	0.000611901	0.014152	MFSD9
ncbi_101119747	1.56	0.44	0.75	1.15	0.2	0.34	0.15	0.51	0.975	0.3	-1.70044	0.000613043	0.0141546	CDH1
ncbi_101113429	2.54	8.53	5	4.51	2.54	2.3	2.8	2.35	5.145	2.4975	-1.04269	0.000629306	0.0144415	CYLD
ncbi_101118490	1.42	2.54	2.2	2.32	1.07	0.87	0.82	1.27	2.12	1.0075	-1.07328	0.000635897	0.0145599	TIRAP
ncbi_101114076	0.59	1.37	1.8	0.99	0.47	0.37	0.6	0.47	1.1875	0.4775	-1.31435	0.000642118	0.0146535	GTF2IRD1
ncbi_101121915	0.1	0.15	0.08	0.08	0.26	0.28	0.18	0.22	0.1025	0.235	1.19704	0.000649314	0.0147932	RPS6KA6
ncbi_443158	21.87	9.21	22.45	8.38	7.56	2.3	7.36	4.83	15.4775	5.5125	-1.48939	0.000658349	0.0149742	MYOG
ncbi_101117619	0.3	0.6	0.48	0.49	0.15	0.15	0.18	0.2	0.4675	0.17	-1.45943	0.000719016	0.0161403	GDNF
ncbi_106991220	2.76	6.08	6.11	5.37	3.28	1.79	2.24	2.52	5.08	2.4575	-1.04764	0.000732194	0.0162765	DOK7
ncbi_101115625	0.08	0	0.34	0	1.99	6.21	2.17	5.87	0.105	4.06	5.27302	0.000753286	0.0166377	Ehd4
ncbi_105601852	3	4.36	2.71	2.65	0.31	1.13	2.09	1.1	3.18	1.1575	-1.45801	0.000781007	0.0171947	TVP23B
MSTRG.4689	4.07	5.12	3.41	3.49	2.25	1.35	1.45	2.17	4.0225	1.805	-1.15609	0.000787627	0.017285	MGST1
ncbi_101121481	1.59	3.89	3.23	1.87	1.36	1.02	1.35	1.28	2.645	1.2525	-1.07846	0.000801139	0.0175256	ZNF48
ncbi_101118494	0.24	0.12	0.19	0.27	0.27	0.72	0.23	0.76	0.205	0.495	1.2718	0.000811692	0.0176476	COL6A5
ncbi_101116766	0.59	1.03	0.92	0.76	0.13	0.2	0.19	0.34	0.825	0.215	-1.94006	0.000811857	0.0176476	MGARP
ncbi_101119990	2.83	2.37	1.3	4.1	0.31	0	0.42	0.47	2.65	0.3	-3.14296	0.000911359	0.0194112	SRSF5
ncbi_101118116	0.81	0.93	1.59	0.9	0.17	0.52	0.18	0.43	1.0575	0.325	-1.70215	0.000914977	0.0194581	Ybx2
ncbi_101106823	0.64	0.67	0.49	0.85	0.16	0.18	0.23	0.14	0.6625	0.1775	-1.9001	0.000930147	0.0197502	HDHD3
ncbi_443047	1.93	4.9	2.62	5.8	0.6	2.2	1.4	1.4	3.8125	1.4	-1.44531	0.000951318	0.0201065	AQP3
ncbi_101113506	0.73	11.9	9.14	2.95	1.04	0.96	1.01	0.94	6.18	0.9875	-2.64575	0.00100166	0.0209769	METTL21C
ncbi_101102700	0.71	1.24	1.08	1.15	0.47	0.54	0.59	0.47	1.045	0.5175	-1.01387	0.00105302	0.0216799	TBC1D2
ncbi_101121229	0.78	1	1.3	1.09	0.36	0.6	0.35	0.44	1.0425	0.4375	-1.25269	0.00108893	0.0221851	CLDN15
ncbi_101117742	0.64	0.69	1.22	0.8	2.43	2.27	2.94	0.62	0.8375	2.065	1.30198	0.00109004	0.0221851	Wbp1
ncbi_101106189	0.74	0.72	0.96	0.61	0.25	0.4	0.38	0.43	0.7575	0.365	-1.05335	0.00112705	0.0228033	PPFIA4
ncbi_101102245	0.54	1.35	1.04	1.22	0.41	0.53	0.6	0.44	1.0375	0.495	-1.06761	0.0011379	0.022989	MTHFD1L
ncbi_101103481	0.06	0.04	0.06	0.03	0.13	0.13	0.12	0.08	0.0475	0.115	1.27563	0.00114397	0.0230776	ROS1
ncbi_780518	0.79	1.34	0.95	0.96	0.32	0.57	0.42	0.64	1.01	0.4875	-1.05088	0.00114632	0.0230911	CLMP
ncbi_101106243	0.4	0.5	0.43	0.21	0.05	0.21	0.14	0.09	0.385	0.1225	-1.65208	0.00117408	0.0235468	MYADM
ncbi_101112325	2.46	0.5	0.33	1.63	7.42	9.58	9.95	5.39	1.23	8.085	2.71659	0.00118246	0.0236458	PPDPFL
ncbi_105613829	0.22	0.28	0.25	0.24	0.1	0.06	0.06	0.05	0.2475	0.0675	-1.87447	0.00120754	0.0240771	Ace3
ncbi_101107513	0.38	0.86	0.43	1.17	0	0.13	0.22	0.17	0.71	0.13	-2.44931	0.0012098	0.0240874	FCN2
ncbi_101121828	0.25	1.06	0.59	0.65	0.2	0.1	0.3	0.22	0.6375	0.205	-1.6368	0.00130183	0.0253681	ZNF385B
ncbi_101110051	0.18	0.32	0.06	0.21	0.28	0.55	0.54	0.39	0.1925	0.44	1.19265	0.00130631	0.0254193	FOXP2
ncbi_101112342	0.27	0.33	0.31	0.31	0.41	0.63	0.93	0.59	0.305	0.64	1.06926	0.00132123	0.0256656	RASGRP4
ncbi_101112424	1.76	4.89	3.17	4.22	2.08	1.83	1.35	1.38	3.51	1.66	-1.08029	0.0013235	0.0256656	LOXL1
ncbi_101113636	0.18	0.24	0.1	0.23	0.74	0.41	0.24	0.4	0.1875	0.4475	1.255	0.00135892	0.0260738	VCAM1
ncbi_101104046	1.16	0.51	0.75	0.72	2.41	1.14	2.15	0.87	0.785	1.6425	1.06513	0.00138648	0.0264456	SLC19A3
ncbi_105611998	0.66	0.68	0.77	1.68	6.07	0.38	8.72	1.37	0.9475	4.135	2.12569	0.00138792	0.0264456	COPS9
ncbi_114114874	65.23	62.07	15.71	66.74	123.4	162.7	107.39	142.46	52.4375	133.988	1.35343	0.00140796	0.026701	RPL23
ncbi_114108725	1.58	0.86	1.05	1.14	5.14	0.83	1.65	4.09	1.1575	2.9275	1.33866	0.0014091	0.026701	ULBP1
ncbi_101116091	0.11	0.1	0.07	0.08	0.2	0.1	0.32	0.18	0.09	0.2	1.152	0.00144692	0.0270815	CDH6
MSTRG.5006	0.42	0.87	0.68	0.46	0.35	0.17	0.26	0.29	0.6075	0.2675	-1.18335	0.00145135	0.0270906	--
ncbi_101107064	2.83	0.72	1.81	2.98	3.38	10.55	5.47	8.18	2.085	6.895	1.7255	0.00146362	0.0272456	HSPA6
ncbi_101123045	0.59	1.71	1.93	0	0	0	0	0	1.0575	0.001	-10.0464	0.00155073	0.0285959	PGGT1B
ncbi_101114604	1.59	2.71	1.49	2.34	1.18	0.56	1.11	1.21	2.0325	1.015	-1.00178	0.00159739	0.0289988	SEMA3C
ncbi_101113705	0.51	0.23	0.21	0.53	0.65	1.67	0.87	1.06	0.37	1.0625	1.52187	0.00160329	0.029058	UBD
ncbi_101109229	0	1.59	0.46	2.4	0	0	0	0	1.1125	0.001	-10.1196	0.00163753	0.0294841	WDR3
ncbi_494547	0.69	0.5	0.53	0.51	0.55	1.98	0.78	1.46	0.5575	1.1925	1.09695	0.00166377	0.0298392	TLR9
ncbi_101123017	0.29	0.51	0.53	0.41	0.16	0.27	0.18	0.24	0.435	0.2125	-1.03355	0.00168935	0.0300418	GPRASP1
ncbi_114112279	52.48	14.2	32.83	32.04	9.52	12.82	16.04	7.56	32.8875	11.485	-1.51779	0.00172404	0.0305017	Obscn
ncbi_101116652	0.13	0.64	0.35	0.41	0.17	0.14	0.05	0.08	0.3825	0.11	-1.79796	0.00174062	0.0306967	ATCAY
ncbi_101106374	5.47	41.55	58.91	6.35	3.45	5.32	5.13	4.57	28.07	4.6175	-2.60385	0.00174536	0.0307407	HLA-A
ncbi_114117869	3.39	10.49	6.79	5.8	2.73	3.4	3.63	3.43	6.6175	3.2975	-1.00491	0.00180899	0.031458	ATP1B3
ncbi_101115546	0.47	0.6	0.79	0.63	0.34	0.31	0.31	0.26	0.6225	0.305	-1.02926	0.00184177	0.0318667	RWDD2A
ncbi_101115549	0.23	0.43	0.53	0.49	0.19	0.14	0.05	0.15	0.42	0.1325	-1.6644	0.00187049	0.032242	GPIHBP1
ncbi_101114749	1.77	7.27	4.95	4.69	2.15	2.2	2.78	1.52	4.67	2.1625	-1.11072	0.00189695	0.0325755	PTPN3
ncbi_101120395	0.12	0.22	0.07	0.26	0.18	0.61	0.28	0.97	0.1675	0.51	1.60634	0.00191964	0.0328418	GBP4
ncbi_105606009	0	0	0	0	0.71	0	0.91	0.31	0.001	0.4825	8.91439	0.00194773	0.0331983	FLVCR2
ncbi_101119165	14.11	60.04	26.92	32.37	13.18	18.61	14.26	16.65	33.36	15.675	-1.08965	0.00196094	0.0333408	MN1
ncbi_101106773	0.17	0.33	0.19	0.18	0.27	0.65	0.54	0.33	0.2175	0.4475	1.04087	0.00200386	0.0337804	CDKL2
ncbi_101105754	0.12	0.02	0.02	0.17	0.38	0.49	0.33	0.31	0.0825	0.3775	2.19401	0.00202953	0.034061	FAM47E
ncbi_101114557	0.57	4.49	2.34	2.16	1.04	0.73	1.12	0.55	2.39	0.86	-1.4746	0.00203044	0.034061	NPR3
ncbi_101106146	0.63	1.71	0.58	0	0	0	0	0	0.73	0.001	-9.51175	0.00203057	0.034061	ORC2
ncbi_101113632	0.31	0.42	0.08	0	2.28	0.41	0.68	1.44	0.2025	1.2025	2.57004	0.00210106	0.0351148	HIST1H2BB
ncbi_101112074	1.93	2.8	3.48	2.4	1.45	1.25	0.72	1.8	2.6525	1.305	-1.0233	0.00220435	0.0363938	TMEM104
ncbi_442997	1.3	0.2	0.83	0.69	1.93	1.47	2.06	2.11	0.755	1.8925	1.32574	0.0022271	0.036598	CXCL10
ncbi_101120446	2.17	2.07	2.33	2.36	1.36	0.89	1.23	0.93	2.2325	1.1025	-1.01788	0.00234964	0.0379756	CYB561D2
ncbi_114108670	0.43	0.52	0.73	0.28	0.09	0.15	0.09	0.16	0.49	0.1225	-2	0.00235555	0.0379928	GCNT2
ncbi_101108165	0.02	0.03	0.02	0.03	0.13	0.04	0.07	0.07	0.025	0.0775	1.63227	0.00238341	0.0381444	PCDH10
ncbi_101114980	0.24	0.5	0.33	0.41	0.12	0.06	0.21	0.19	0.37	0.145	-1.35147	0.00239213	0.0381684	ST8SIA2
ncbi_101110700	0.18	1.12	0.18	0.43	0.05	0	0.13	0	0.4775	0.045	-3.4075	0.00252865	0.0394757	IGSF23
ncbi_105604151	0.42	0.43	0.95	0.57	0.16	0.09	0.06	0.2	0.5925	0.1275	-2.21632	0.00260203	0.039941	--
ncbi_101113161	1.8	0.89	2.37	1.5	0.18	0.22	1.23	0.45	1.64	0.52	-1.65711	0.00261597	0.0399929	PYCR1
ncbi_101109846	0.39	0.06	0.43	0.45	1.86	0.51	2.29	0.55	0.3325	1.3025	1.96986	0.00262001	0.0399929	GALNT1
ncbi_101102121	0.35	1.13	0.66	0.77	0.28	0.29	0.14	0.38	0.7275	0.2725	-1.41669	0.00274829	0.0412725	TRMT9B
ncbi_101119084	1.98	0.72	2.66	0.47	0.59	0.5	0.26	0.45	1.4575	0.45	-1.6955	0.00280655	0.0419091	HPDL
ncbi_101102525	0.41	0.77	0.7	0.42	0.19	0.22	0.19	0.33	0.575	0.2325	-1.30633	0.00285433	0.0425301	QTRT2
ncbi_101114004	0.28	0.64	0.5	0.51	0.17	0.27	0.34	0.17	0.4825	0.2375	-1.0226	0.00293219	0.0431003	SLC4A8
ncbi_101103355	0.45	0.27	0.16	0.5	0.85	0.71	0.91	0.55	0.345	0.755	1.12988	0.00299094	0.0438522	CD83
ncbi_101106905	3.23	4.04	5.23	2.97	2.8	1.53	1.57	1.79	3.8675	1.9225	-1.00842	0.00305865	0.0445596	Ninj1
ncbi_101116417	0.37	0.65	0.3	0.48	0.11	0.17	0.23	0.17	0.45	0.17	-1.40439	0.00306906	0.0446488	SUV39H2
ncbi_105603928	0.96	0	0.27	1.02	0.92	15.3	3.02	11.33	0.5625	7.6425	3.76412	0.00308334	0.0447769	BoLA-DQB
ncbi_101113348	0.13	0.35	0.2	0.35	0.13	0.03	0.07	0.11	0.2575	0.085	-1.59904	0.00322855	0.0463223	CNTN2
ncbi_101113880	0	0.22	0.15	0.15	0	0.04	0	0	0.13	0.01	-3.70044	0.0033199	0.0471653	Kcnc1
ncbi_101106244	0.6	0.49	0.25	0.54	0.15	0.16	0	0.07	0.47	0.095	-2.30666	0.003479	0.0488696	TP53I3
ncbi_101121742	14.89	11.06	7.29	22.07	15.11	42.2	38.53	28.59	13.8275	31.1075	1.16972	0.00350029	0.0490184	ARID5B
ncbi_101123646	0.16	0.6	0.3	0.34	0.48	0.63	1.38	0.62	0.35	0.7775	1.15149	0.00356613	0.0495865	AFMID
ncbi_101109565	0.17	0.58	0.98	0.19	0.12	0.27	0.1	0.18	0.48	0.1675	-1.51887	0.00360596	0.0499382	SLC28A1

## Sheet: 4 m vs 6 y
DEGs in 4 m vs 6 y
id	A-1_fpkm	A-2_fpkm	A-3_fpkm	A-4_fpkm	D-1_fpkm	D-2_fpkm	D-3_fpkm	D-4_fpkm	A_mean	D_mean	log2(fc)	PValue	FDR	Symbol
ncbi_443005	9897.12	9728.76	6359.3	10077.7	202.83	198.18	241.19	166.15	9015.72	202.088	-5.47939	5.37e-220	8.06e-216	GAPDH
ncbi_101115970	7.69	8.27	7.3	9.23	47.44	58.12	61.11	54.98	8.1225	55.4125	2.77022	1.68e-106	1.26e-102	SESN1
ncbi_101120031	5.81	7.27	6.41	5.38	0.13	0.1	0.04	0.08	6.2175	0.0875	-6.15091	4.1e-77	2.05e-73	ADAMTS8
ncbi_100820742	14.12	13.93	12.22	13.27	61.6	54.83	52.42	47.12	13.385	53.9925	2.01214	1.18e-59	4.42e-56	GPX1
ncbi_101113426	5.08	4.36	6.49	4.77	24.54	24.9	33.29	22.49	5.175	26.305	2.34571	5.26e-59	1.58e-55	PRKCQ
ncbi_101106449	8.05	7.97	9.13	7.66	23.31	25.02	28.42	23.37	8.2025	25.03	1.60952	1.73e-58	4.33e-55	PCMTD2
ncbi_100913152	0	0	0	0	253.56	338.59	220.06	269.13	0.001	270.335	18.0444	3.68e-58	7.89e-55	HSPA1B
ncbi_101119737	0.17	0.21	0.43	0.44	4.35	5.68	5.42	6.46	0.3125	5.4775	4.13159	8.2e-58	1.54e-54	NPTX1
ncbi_443535	6.2	8.4	8.54	7.99	0.52	0.95	0.81	0.81	7.7825	0.7725	-3.33263	1.58e-57	2.63e-54	LDLR
ncbi_100568292	0.15	0.04	0.1	0.13	2.52	6.77	6.67	4.37	0.105	5.0825	5.59708	3.07e-57	4.6e-54	DRD1
ncbi_101108953	20.6	16.72	19.92	21.24	1.28	2.5	1.91	2.21	19.62	1.975	-3.3124	4.54e-56	6.19e-53	PDE4D
ncbi_101114059	147.18	160.1	155	153.09	385.54	383.85	440.85	360.33	153.843	392.642	1.35176	1.37e-52	1.71e-49	ASB2
ncbi_101104499	4.15	2	2.96	2.41	19.34	17.95	23.48	17.04	2.88	19.4525	2.75581	2.1e-50	2.42e-47	FBXL4
ncbi_101105292	20.03	25.16	24.54	21.99	4.69	4.24	5.59	5.31	22.93	4.9575	-2.20955	6.69e-50	7.16e-47	CASQ2
ncbi_101117301	38.68	46.95	48.12	38.62	126.05	125.98	142.05	123.84	43.0925	129.48	1.58722	1.63e-49	1.64e-46	CEFIP
ncbi_101119015	5.92	5.13	5.98	5.77	17.01	19.87	22.34	15.37	5.7	18.6475	1.70995	3.06e-45	2.87e-42	ABCA1
ncbi_101119787	7.98	7.07	7.53	7.96	1.61	2.08	1.49	1.95	7.635	1.7825	-2.09873	3.83e-45	3.38e-42	RET
ncbi_101104593	13.69	12.82	17.58	11.95	2.63	2.93	3.03	3.44	14.01	3.0075	-2.21982	3.25e-44	2.71e-41	Enah
ncbi_101120765	27.14	29.58	34.32	29.76	74.73	82.86	95.65	79.77	30.2	83.2525	1.46295	1.5e-43	1.19e-40	KLHL21
ncbi_101111038	12.8	14.97	16.16	12.46	39.23	45.81	42.94	44.23	14.0975	43.0525	1.61066	1.79e-42	1.34e-39	EPHX1
ncbi_105606262	1.08	1.3	1.94	1.55	8.17	11.24	12.59	9.52	1.4675	10.38	2.82237	4.01e-42	2.86e-39	DCXR
ncbi_101117496	4.48	4.3	4.21	4.44	17.45	14.97	23.8	14.31	4.3575	17.6325	2.01666	8.24e-42	5.62e-39	ASB4
ncbi_101112325	0.44	1.02	0.64	0.67	7.42	9.58	9.95	5.39	0.6925	8.085	3.54536	3.79e-41	2.47e-38	PPDPFL
ncbi_101109342	74.15	80.28	80.71	87.08	20.17	27.31	21.08	23.52	80.555	23.02	-1.80709	9.18e-41	5.74e-38	SLC9A3R2
ncbi_101113081	3.18	3.24	2.85	2.98	0.44	0.63	0.49	0.54	3.0625	0.525	-2.54432	4.73e-38	2.84e-35	MTUS2
ncbi_101110819	2.17	1.5	2.49	2.31	15.24	16.01	10.55	17.26	2.1175	14.765	2.80175	1.57e-37	9.08e-35	RBM3
ncbi_106991367	4.08	3.94	4.71	4.53	10.76	15.67	14.06	13.78	4.315	13.5675	1.65272	2.59e-37	1.44e-34	IRS2
ncbi_101106412	3.99	2.79	2.93	3.82	12.43	13.75	11.86	11.55	3.3825	12.3975	1.87389	8.07e-37	4.32e-34	ASL
ncbi_101115771	24.48	25.61	27.66	28.53	56.98	57.77	61.11	58.17	26.57	58.5075	1.13882	1.33e-36	6.86e-34	HMGN2
ncbi_101110686	5.57	4.64	5.26	5.41	12.23	15.55	16.83	13.7	5.22	14.5775	1.48162	2.11e-36	1.05e-33	Coro6
ncbi_100885768	21.87	21.11	15.89	24.51	4.06	1.98	3.62	2.67	20.845	3.0825	-2.75753	3.93e-36	1.9e-33	TFRC
ncbi_101111152	34.25	41.15	47.54	41.62	12.55	10.83	10.25	12.11	41.14	11.435	-1.84709	2.1e-35	9.84e-33	ELN
ncbi_101113622	29.37	34.88	21.9	37.87	5.33	2.43	4.38	3.34	31.005	3.87	-3.0021	6.09e-35	2.77e-32	SCN4B
ncbi_101115250	24.91	18.85	26.28	19.06	56.82	62.97	61.46	61.77	22.275	60.755	1.44758	1.28e-34	5.63e-32	YPEL3
ncbi_101105177	0.1	0.06	0.13	0.05	1.65	2.03	1.77	1.37	0.085	1.705	4.32617	3.17e-34	1.36e-31	TGM3
ncbi_100142676	1.99	0.79	2.53	2.61	16.11	18.16	15.86	15.23	1.98	16.34	3.04484	2.17e-33	9.03e-31	FBXO32
ncbi_101109208	103.07	119.27	128.56	114.16	35.64	34.75	31.59	42.3	116.265	36.07	-1.68855	4.87e-33	1.97e-30	SERPINH1
ncbi_101119997	9.98	7.61	8.86	7.79	25.12	44.87	43.44	31.44	8.56	36.2175	2.081	1.76e-32	6.94e-30	SCPEP1
ncbi_101117758	6.41	7.26	6.48	7.15	21.35	28.14	19	24.97	6.825	23.365	1.77545	2.09e-32	8.04e-30	CIRBP
ncbi_101120326	14.04	28.94	26.96	12.95	2.14	0.84	0.97	1	20.7225	1.2375	-4.0657	5e-32	1.88e-29	TUBA1B
ncbi_101107864	2.51	2.74	3.32	2.99	0.15	0.18	0.45	0.18	2.89	0.24	-3.58996	8.37e-32	3.06e-29	COMP
ncbi_101113943	4.15	4.69	5.07	3.35	14.12	13.9	13.53	15.8	4.315	14.3375	1.73236	9.3e-32	3.32e-29	ADHFE1
ncbi_101106995	2.86	3.57	3.08	3.09	0.4	0.69	0.29	0.44	3.15	0.455	-2.79141	3.55e-31	1.24e-28	LSS
ncbi_101111299	21.09	22.09	20.34	22.11	42.43	44.23	52.87	42.99	21.4075	45.63	1.09187	9.85e-31	3.36e-28	SSH2
ncbi_101116941	18.91	13.74	16.88	17.79	36.96	46.97	54.4	44.31	16.83	45.66	1.4399	3.12e-30	1.04e-27	LRRC2
ncbi_101108530	112.49	121.59	121.22	119.34	45.03	54.04	48.58	48.48	118.66	49.0325	-1.27502	2.4e-29	7.84e-27	BAG3
ncbi_101110594	0.96	0.86	0.85	0.84	2.89	3.29	3.53	3.06	0.8775	3.1925	1.86322	2.86e-29	9.12e-27	CCNG2
ncbi_101102380	47.86	37.5	35.53	41.84	12.18	15.1	12.04	13.29	40.6825	13.1525	-1.62907	3.03e-29	9.47e-27	Mat2a
ncbi_101123648	6.3	6.25	7.29	5.84	1.26	1.97	1.45	1.76	6.42	1.61	-1.99551	3.96e-29	1.21e-26	ARHGAP23
ncbi_101116336	12.44	13.78	17.65	11.41	55.05	47.1	38.38	51.18	13.82	47.9275	1.7941	5.05e-29	1.51e-26	CES1
ncbi_101122535	1.28	0.93	1.13	0.82	3.56	4.47	5.16	4.92	1.04	4.5275	2.12213	6.47e-29	1.9e-26	GHDC
ncbi_101112844	742.12	653.06	617.56	584.73	260.86	284.1	281.4	269.3	649.367	273.915	-1.24531	7.37e-29	2.13e-26	HSPA8
ncbi_101106288	11.34	11.23	13.12	12.92	29.99	29.36	26.06	26.54	12.1525	27.9875	1.20353	1.75e-28	4.95e-26	H1FX
ncbi_101108754	1.78	1.96	1.27	1.46	6.62	7.7	6.36	6.83	1.6175	6.8775	2.08812	2.2e-28	6.1e-26	GALK2
ncbi_101106898	10.24	16.19	11.44	16.82	2.68	2.39	2.11	2.77	13.6725	2.4875	-2.45851	2.68e-28	7.3e-26	POPDC2
ncbi_101119610	0.33	0.09	0	0.09	251.84	68.75	84.52	303.38	0.1275	177.123	10.44	4.52e-28	1.21e-25	MYOZ1
ncbi_101113458	0.67	1.17	1.28	0.88	4.41	8.03	6.77	4.75	1	5.99	2.58256	6.68e-28	1.76e-25	GALNT15
ncbi_101110341	0.45	0.27	0.21	0.26	1.37	1.81	2.2	2.2	0.2975	1.895	2.67124	6.88e-28	1.78e-25	HAS2
ncbi_101105085	6.45	5.54	6.52	5.14	12.69	12.41	12.96	13.43	5.9125	12.8725	1.12245	2.04e-27	5.2e-25	SPATA20
ncbi_100820746	281.08	224.36	280.38	207.66	69.3	81.47	76.81	93.78	248.37	80.34	-1.6283	2.45e-27	6.14e-25	ANKRD1
ncbi_101106801	10.65	11.22	12.48	10.58	3.71	3.52	2.99	4.28	11.2325	3.625	-1.63163	9.13e-27	2.24e-24	PLXND1
ncbi_101120243	8.59	7.84	9.22	9.37	3.53	3.2	3.22	3.68	8.755	3.4075	-1.36139	2.33e-26	5.64e-24	LMNB2
ncbi_101117847	7.23	7.21	7.43	6.96	3.23	2.8	3.1	2.76	7.2075	2.9725	-1.27782	3.31e-26	7.81e-24	GALNT16
ncbi_497274	1894.09	1658.67	1713.05	1379.43	675.5	668.91	593.49	626.87	1661.31	641.192	-1.37349	3.33e-26	7.81e-24	CRYAB
ncbi_101107777	34.25	36.83	41.43	37.71	11.63	5.85	7.02	9.41	37.555	8.4775	-2.14729	2.13e-25	4.93e-23	COL5A1
ncbi_101119104	5.09	2.56	3.68	2.65	11.83	13.12	14.83	13.15	3.495	13.2325	1.92072	2.39e-25	5.44e-23	RORC
ncbi_101109381	7.73	10.81	11.95	10.14	25.74	31.6	29.35	28.3	10.1575	28.7475	1.50089	3.1e-25	6.93e-23	TBC1D17
ncbi_101110234	3.94	3.37	4	3.54	7.21	9.56	9.25	7.96	3.7125	8.495	1.19422	3.33e-25	7.35e-23	PGPEP1
ncbi_101122936	23.61	24.2	27.96	21.93	49.39	75.5	69.68	69.32	24.425	65.9725	1.43351	4.28e-25	9.3e-23	CALCOCO1
ncbi_101109929	12.06	12.36	11.02	15.03	27.59	29.09	36.16	30.17	12.6175	30.7525	1.28528	6.81e-25	1.46e-22	FBXO40
ncbi_101111187	0.94	0.74	0.69	0.52	3.22	3.03	3.93	2.92	0.7225	3.275	2.18043	1.25e-24	2.64e-22	STEAP4
ncbi_101115230	32.34	23.48	26.93	24.05	70.23	73.5	55.09	74.46	26.7	68.32	1.35547	2.67e-24	5.56e-22	ubq-1
ncbi_101109633	2.05	1.66	2.02	1.56	5.5	7.81	7.94	6.39	1.8225	6.91	1.92277	2.8e-24	5.75e-22	AKR1C3
ncbi_101109602	6.9	6.66	7.37	5.54	1.93	0.98	1.18	1.16	6.6175	1.3125	-2.33397	3.68e-24	7.46e-22	OLFM1
ncbi_101121849	3.22	5.97	4.83	3.86	28.19	16.3	27.25	16.8	4.47	22.135	2.30798	3.81e-24	7.62e-22	Tmem140
ncbi_100147785	3.51	4.21	3.87	4.31	0.95	0.92	0.88	1.13	3.975	0.97	-2.0349	9.69e-24	1.91e-21	SLC25A15
ncbi_101122782	24.87	19.68	22.81	21.13	8.2	10.16	9.9	9.55	22.1225	9.4525	-1.22675	1.2e-23	2.34e-21	HSPA4
ncbi_101123553	9.95	12.21	10.56	11.81	3.87	3.35	3.07	3.61	11.1325	3.475	-1.67969	1.24e-23	2.39e-21	P4HA2
ncbi_101107101	17.92	21.55	20.68	21.7	8.74	8.72	8.47	8.16	20.4625	8.5225	-1.26363	2.66e-23	5.06e-21	NID2
ncbi_101112853	64.76	75.26	73.99	67.04	29.13	29.61	34	26.33	70.2625	29.7675	-1.23902	3.4e-23	6.34e-21	ALAS1
ncbi_101109448	57.06	61.07	50.35	60.2	135.63	138.84	181.63	115.8	57.17	142.975	1.32243	3.98e-23	7.28e-21	DDIT4L
ncbi_101111037	12.24	8.72	12.23	10.84	3.23	3.32	4.4	2.7	11.0075	3.4125	-1.68959	5.79e-23	1.05e-20	FMOD
ncbi_101108206	7.16	12.38	9.38	11.56	2.65	2.24	2.66	2.43	10.12	2.495	-2.0201	9.67e-23	1.73e-20	TTC7A
ncbi_101110160	12	11.08	14.88	14.44	23.52	35.98	34.85	28.3	13.1	30.6625	1.22691	1e-22	1.77e-20	RSC1A1
ncbi_101115711	7.04	7.07	6.63	6.19	15.03	13.74	18.81	13.11	6.7325	15.1725	1.17224	1.04e-22	1.82e-20	KLHL33
ncbi_101119899	10.46	11.79	11.23	11.69	4.88	3.82	4.17	4.49	11.2925	4.34	-1.3796	1.5e-22	2.59e-20	MICALL1
ncbi_101115457	19.11	21.3	25.24	21.88	9.18	8.28	7.7	9.06	21.8825	8.555	-1.35494	1.76e-22	3e-20	COL5A3
ncbi_100307048	252.72	359.1	331.84	350.73	105.99	70.3	83.35	107.39	323.598	91.7575	-1.8183	1.81e-22	3.06e-20	SPARC
ncbi_100125354	6.91	7.74	7.12	8.21	21.92	22.32	30.84	16.82	7.495	22.975	1.61606	2.45e-22	4.09e-20	PLIN2
ncbi_101119343	16.93	12.94	16	13.7	6.25	6.56	5.8	6.25	14.8925	6.215	-1.26076	5.18e-22	8.53e-20	HEYL
ncbi_101111665	1.25	1.14	1.57	0.81	3.58	3.96	4.56	2.99	1.1925	3.7725	1.66153	5.23e-22	8.53e-20	PGPEP1L
ncbi_101121737	24.13	23.95	25.53	25.24	11.15	10.25	11.78	9.17	24.7125	10.5875	-1.22288	5.48e-22	8.85e-20	ZNF771
ncbi_101102930	1.12	0.73	1.08	0.77	2.76	2.7	3.55	2.61	0.925	2.905	1.65101	6.55e-22	1.04e-19	Trim23
ncbi_100169937	7.62	5.56	8.16	5.77	18.07	13.91	19.18	16.23	6.7775	16.8475	1.31371	1.05e-21	1.66e-19	FBXL3
ncbi_100170113	11.67	2.66	7.9	6.88	0.38	0.66	0.56	0.82	7.2775	0.605	-3.58844	1.23e-21	1.93e-19	CYP1A1
ncbi_101121007	1.32	0.99	1.08	1.01	2.97	2.39	2.95	2.85	1.1	2.79	1.34276	1.25e-21	1.94e-19	ARHGEF37
ncbi_101121539	19.43	21	20.32	18.48	43.29	37.12	44.45	34.76	19.8075	39.905	1.01052	1.39e-21	2.14e-19	CYP2F3
ncbi_101107608	7.87	4.5	6.12	4.85	17.77	13.98	18.1	15.37	5.835	16.305	1.48251	1.59e-21	2.42e-19	KLHL38
ncbi_101109908	7.44	9.01	8.18	8.88	3.48	3.18	3.87	3.5	8.3775	3.5075	-1.25608	1.75e-21	2.63e-19	Dchs1
ncbi_101117084	1.15	0.58	0.99	0.92	2.72	2.79	3.71	3.12	0.91	3.085	1.76133	4.3e-21	6.26e-19	Tbx18
ncbi_443090	13.31	8.32	13.3	9.61	23.76	34.12	35.72	30.41	11.135	31.0025	1.47728	4.41e-21	6.36e-19	GPD2
ncbi_101112118	12.49	15.79	14.35	15.05	30.35	33.2	42.03	29.8	14.42	33.845	1.23087	8.14e-21	1.16e-18	CEP85
ncbi_101104278	37.75	40.27	36.61	41.12	71.07	101.06	106.14	81.92	38.9375	90.0475	1.20953	8.68e-21	1.22e-18	FYCO1
ncbi_101116013	0.2	0.18	0.23	0.11	1.03	1.17	1.32	1.13	0.18	1.1625	2.69116	9.18e-21	1.28e-18	GRAMD1C
ncbi_101103884	1.19	1.59	1.55	1.71	0	0	0	0	1.51	0.001	-10.5603	1.2e-20	1.65e-18	LCLAT1
ncbi_443054	7.66	7.61	7.68	6.02	15.73	16.58	19.53	15.41	7.2425	16.8125	1.21497	2.04e-20	2.79e-18	GSTA2
ncbi_101123304	6.28	4.94	4.58	5.44	9.04	12.37	11.56	10.34	5.31	10.8275	1.02792	2.3e-20	3.1e-18	DAPK3
ncbi_101113882	7.09	9.37	7.56	10.79	2.29	2.6	2.09	2.38	8.7025	2.34	-1.89492	2.57e-20	3.44e-18	CREB3L1
ncbi_101110817	6.94	7.44	8.08	8.64	3.03	3.59	3.45	3.03	7.775	3.275	-1.24735	2.62e-20	3.47e-18	SLC7A2
ncbi_101106812	3.44	1.94	2.54	2.39	7.23	6.63	7.63	5.69	2.5775	6.795	1.3985	3.34e-20	4.4e-18	ST3GAL6
ncbi_101112153	7.22	4.53	5.86	5.73	12.97	32.31	26.33	25.14	5.835	24.1875	2.05146	3.65e-20	4.76e-18	FOXS1
ncbi_101121418	11.13	13.08	12.18	12.07	4.66	3.72	4.3	4.92	12.115	4.4	-1.46122	3.7e-20	4.79e-18	KDELR3
ncbi_101110851	10.57	8.96	8.73	8.7	3.27	3.15	4.59	3.16	9.24	3.5425	-1.38312	4.23e-20	5.42e-18	AMD1
ncbi_101117635	2.94	1.92	2.78	2.13	5.28	6.17	6.17	5.87	2.4425	5.8725	1.26562	4.66e-20	5.88e-18	EHHADH
ncbi_101122561	88.56	97.9	92.99	87.67	35.67	44.5	36.53	40.85	91.78	39.3875	-1.22044	5.14e-20	6.42e-18	STIP1
ncbi_101109157	2.48	2.04	3.74	2.67	0	0	0	0	2.7325	0.001	-11.416	8.46e-20	1.04e-17	Cstf2t
ncbi_101101908	1.97	1.42	1.85	1.57	3.43	4.39	4.65	4.23	1.7025	4.175	1.29412	1.02e-19	1.24e-17	PLXDC2
ncbi_101106589	13.48	17.25	14.72	16.56	4.59	5.19	3.4	6.93	15.5025	5.0275	-1.62459	1.27e-19	1.53e-17	SPRY4
ncbi_101114193	2.65	2.99	2.37	2.92	6.5	11.07	7.59	9.35	2.7325	8.6275	1.65872	1.28e-19	1.53e-17	RASGEF1B
ncbi_101109670	2.12	3.2	2.2	3.23	0.61	0.28	0.53	0.54	2.6875	0.49	-2.45541	1.34e-19	1.59e-17	Uck2
ncbi_101118067	1.97	1.47	2.33	1.12	5.46	5.1	6.13	4.63	1.7225	5.33	1.62963	3.95e-19	4.67e-17	Mxi1
ncbi_101105089	0.23	0.1	0.13	0.18	1.18	1.12	1.49	1.41	0.16	1.3	3.02237	4.07e-19	4.78e-17	FMO1
ncbi_101105870	10.69	8.81	8.75	8.68	15.62	18.28	22.45	17.92	9.2325	18.5675	1.00799	1.17e-18	1.36e-16	TFDP2
ncbi_101102276	2.07	1.8	2.14	2.19	7.17	7.53	4.94	7.4	2.05	6.76	1.7214	1.38e-18	1.57e-16	PMF1
ncbi_101114493	21.73	19.4	23.1	22.15	10.22	7.27	7.12	8.99	21.595	8.4	-1.36224	1.57e-18	1.75e-16	COL5A2
ncbi_101105455	6.56	6.02	7.18	6.07	2.65	2.06	1.63	1.95	6.4575	2.0725	-1.6396	2.08e-18	2.31e-16	CD248
ncbi_101105155	3.92	2.02	3.99	2.14	9.97	9.03	10.64	9.88	3.0175	9.88	1.71116	2.42e-18	2.67e-16	BTNL9
ncbi_101114874	50.57	31.42	46.35	37.76	79.54	89.95	101.1	90.93	41.525	90.38	1.12202	2.73e-18	2.99e-16	PNRC1
ncbi_101110875	6.3	5.65	8.06	7.22	1.91	2.66	1.95	2.52	6.8075	2.26	-1.5908	3.37e-18	3.65e-16	TBX3
ncbi_101102691	19.93	15.06	18.48	14.98	39.03	30.45	44.09	33.38	17.1125	36.7375	1.1022	3.38e-18	3.65e-16	KLHL24
ncbi_101108012	2.87	2.75	2.72	2.69	5.49	7.12	6.85	5.13	2.7575	6.1475	1.15664	3.61e-18	3.84e-16	HDAC4
ncbi_101114236	7.41	5.59	7.35	6.2	2.55	1.47	1.66	1.76	6.6375	1.86	-1.83534	4.58e-18	4.84e-16	Fzd9
ncbi_101110847	3.53	3.88	3.75	4	0.94	1.47	1.16	1.13	3.79	1.175	-1.68954	4.63e-18	4.86e-16	RAB15
ncbi_100169699	5.33	9.72	7.86	8.21	21.7	26.04	30.27	19.85	7.78	24.465	1.65288	4.67e-18	4.86e-16	LIPE
ncbi_101112765	25.02	24.91	27.33	23.68	12.13	8.24	11.82	9.03	25.235	10.305	-1.29208	5.53e-18	5.72e-16	MLEC
ncbi_101113972	2.24	1.58	1.79	2.11	4.25	4.21	4.84	3.89	1.93	4.2975	1.1549	5.7e-18	5.86e-16	CHD1L
ncbi_101104165	2.77	2.86	3.56	2.34	6.78	7.09	8.23	6.09	2.8825	7.0475	1.28979	6.45e-18	6.58e-16	FMO3
ncbi_101122217	34.67	37.23	33.25	34.92	16.61	17.76	18.8	16.2	35.0175	17.3425	-1.01376	6.95e-18	7.05e-16	CCT5
ncbi_101115038	3.6	2.72	3.32	2.37	8.93	6.48	7.4	6.86	3.0025	7.4175	1.30477	7.15e-18	7.2e-16	UNC93A
ncbi_101113946	50.06	56.36	54.03	51.65	25.3	28.35	25.63	26.25	53.025	26.3825	-1.00709	9.49e-18	9.49e-16	MPRIP
ncbi_101110829	3.98	5.31	4.67	4.36	1.38	1.41	1.42	1.35	4.58	1.39	-1.72026	1.21e-17	1.19e-15	Six2
ncbi_443452	6.17	4.89	5.86	6.26	1.76	2.52	1.62	2.42	5.795	2.08	-1.47823	1.46e-17	1.43e-15	SLC7A1
ncbi_101120524	6.95	5.83	7.8	7.23	2.18	2.1	2.82	2.68	6.9525	2.445	-1.5077	1.61e-17	1.57e-15	LARP1B
ncbi_101123207	7.45	6.63	8.32	8.4	3.47	3.15	2.94	3.08	7.7	3.16	-1.28493	1.95e-17	1.89e-15	Dbn1
ncbi_101108696	0.36	0.1	0.62	0.03	9.97	31.28	20.5	21.12	0.2775	20.7175	6.22222	2.12e-17	2.04e-15	HLA-DQA2
ncbi_101104393	18.57	25.49	21.68	22.22	7.81	9.37	8.07	9.22	21.99	8.6175	-1.35151	2.36e-17	2.24e-15	SREBF2
ncbi_101115444	2.61	1.77	2.56	1.59	0.64	0.52	0.72	0.59	2.1325	0.6175	-1.78803	3.02e-17	2.85e-15	Adamts20
ncbi_101110925	803.17	1474.28	955.35	1256.53	296.21	198.91	137.51	287.54	1122.33	230.042	-2.28653	3.1e-17	2.91e-15	Myl6b
ncbi_101118330	38.2	36.34	38.92	39.4	21.11	15.81	20.37	17.46	38.215	18.6875	-1.03207	3.51e-17	3.27e-15	FSTL1
ncbi_101112110	5.25	6.08	6.01	5.19	1.49	1.46	2.3	2.19	5.6325	1.86	-1.59847	3.71e-17	3.43e-15	Ttyh3
ncbi_114113983	0.1	0.42	0.91	0	33.54	54.32	35.04	44.86	0.3575	41.94	6.87424	3.73e-17	3.43e-15	Rps23
ncbi_101106963	16.54	16.99	17.7	17.38	8.1	9	8.34	8.56	17.1525	8.5	-1.01288	4.58e-17	4.19e-15	E2F4
ncbi_101122511	74.21	64.41	74.53	66.13	31.98	27.64	40.29	29.91	69.82	32.455	-1.1052	4.71e-17	4.28e-15	TMBIM6
ncbi_101107597	2.36	2.18	2.41	2.11	11.63	5.51	8.24	5.94	2.265	7.83	1.7895	5.25e-17	4.75e-15	RPL10A
ncbi_101107483	7.19	6.46	7.63	6.57	11.64	17.17	18.58	14.71	6.9625	15.525	1.15692	6.05e-17	5.43e-15	TRIM45
ncbi_101105541	9.48	10.92	9.54	11.4	4.19	3.88	4.22	4.33	10.335	4.155	-1.31462	6.08e-17	5.43e-15	ECM1
ncbi_101115628	15.16	13.16	16.25	17.12	25.65	43.16	45.83	41.7	15.4225	39.085	1.34158	6.17e-17	5.48e-15	TXLNB
ncbi_101106077	5.39	5.79	7.09	5.21	1.88	1.58	1.45	2.36	5.87	1.8175	-1.69141	6.54e-17	5.77e-15	PCDH12
ncbi_101113394	2.62	3.69	2.83	3.2	0.61	0.31	0.25	0.76	3.085	0.4825	-2.67667	7.2e-17	6.28e-15	EXTL1
ncbi_101119220	0.86	1.06	0.95	0.93	2.1	2.32	2.89	2.29	0.95	2.4	1.33703	7.46e-17	6.47e-15	ATG14
ncbi_101118099	2.21	3.04	3.15	2.41	0.65	0.62	0.72	0.44	2.7025	0.6075	-2.15334	7.55e-17	6.51e-15	MEST
ncbi_101117554	71.3	76.52	76.21	81.51	10.92	24.61	11.26	21.34	76.385	17.0325	-2.165	8.59e-17	7.36e-15	TNFRSF12A
ncbi_101118777	0.21	0.13	0.24	0.2	0.52	0.71	0.87	0.8	0.195	0.725	1.89451	9.35e-17	7.97e-15	ZC3H6
ncbi_101108688	0.88	1.17	0.89	1.24	2.34	3.28	4.43	3.29	1.045	3.335	1.67418	1.14e-16	9.67e-15	CREBRF
ncbi_101105403	30.02	32.01	34.64	32.75	17.27	14.34	17.18	15.68	32.355	16.1175	-1.00536	1.22e-16	1.03e-14	PTPA
ncbi_101103759	1.73	0.94	1.48	0.97	3.57	3.46	4.59	3.4	1.28	3.755	1.55267	1.3e-16	1.09e-14	KDM2B
ncbi_101102801	2.34	2.32	2.39	1.74	0.47	0.12	0.5	0.32	2.1975	0.3525	-2.64017	1.47e-16	1.23e-14	C1qtnf6
ncbi_101104340	7.63	23.92	10.22	24.8	1.2	1.09	1.25	1.19	16.6425	1.1825	-3.81496	1.49e-16	1.24e-14	RELT
ncbi_101113893	10.73	12.87	10.98	11.96	37.86	28.08	24.65	26.89	11.635	29.37	1.33587	2.26e-16	1.85e-14	HIST1H1D
ncbi_101112424	4.9	4.94	5.76	5.03	2.08	1.83	1.35	1.38	5.1575	1.66	-1.63549	2.84e-16	2.3e-14	LOXL1
ncbi_101109367	1.76	1.93	1.63	1.45	5.05	4.11	7	4.37	1.6925	5.1325	1.60051	3.94e-16	3.18e-14	TP53INP1
ncbi_101109057	56.88	99.07	68.61	95.77	18.01	25.1	15.93	24.64	80.0825	20.92	-1.9366	4.06e-16	3.24e-14	ANKRD2
ncbi_101107962	59.85	65.3	59.06	65.56	32.22	25.34	29.82	23.09	62.4425	27.6175	-1.17695	4.81e-16	3.8e-14	CDC34
ncbi_106991529	8.36	3.8	7.5	5.7	14.3	32.24	25.22	25.6	6.34	24.34	1.94077	5.02e-16	3.94e-14	IRF4
ncbi_101105434	217.77	113.6	189.59	131.55	47.31	51.24	39.27	58.83	163.127	49.1625	-1.73037	7.41e-16	5.76e-14	Rrad
ncbi_101111306	32.84	43.89	43.28	38.36	15.74	16.42	14.82	18.43	39.5925	16.3525	-1.27572	7.82e-16	6.05e-14	PLOD1
ncbi_101105968	1.19	1.04	1.38	1.25	3.15	2.44	2.9	2.62	1.215	2.7775	1.19283	7.88e-16	6.06e-14	IMPA2
ncbi_100337686	5.13	6.16	5.33	7.08	24.24	11.49	17.79	19.89	5.925	18.3525	1.63109	8.88e-16	6.8e-14	PON3
ncbi_101120886	14.83	11.58	15.2	14.38	6.32	6.86	6.05	7.16	13.9975	6.5975	-1.08518	1.08e-15	8.2e-14	EPHB4
ncbi_101115033	70.9	100.98	83.59	82.41	31.18	36.85	30.21	36.15	84.47	33.5975	-1.33009	1.28e-15	9.61e-14	WDR1
ncbi_101115754	1692.06	2032.61	2045.23	1896.81	584.36	921.33	654.24	766.8	1916.68	731.683	-1.38932	1.36e-15	1.02e-13	HSPB1
ncbi_101113013	1.25	1.01	1.67	1.23	3.97	3.94	2.63	4.22	1.29	3.69	1.51625	1.47e-15	1.09e-13	UNC119B
ncbi_100144763	3.29	3.47	3.11	4.08	1.29	1.16	0.87	1.29	3.4875	1.1525	-1.59743	1.49e-15	1.1e-13	CCND1
ncbi_101120415	6.23	5.42	5.7	5.6	10.37	11.65	15.2	9.8	5.7375	11.755	1.03478	1.63e-15	1.2e-13	FBXO30
ncbi_101123024	89.86	105.08	88.54	105.6	46.25	43.01	50.85	46.75	97.27	46.715	-1.05811	1.95e-15	1.43e-13	STAC3
ncbi_101103811	0.56	0.45	0.5	0.58	0.08	0.01	0	0.04	0.5225	0.0325	-4.00692	2.12e-15	1.55e-13	FBN3
ncbi_101107740	170.6	393.01	227.65	362.64	46.04	85.83	64.15	56.32	288.475	63.085	-2.19308	2.43e-15	1.76e-13	LMCD1
ncbi_654403	355.03	456.12	346.72	455.51	775.27	804.59	904.52	758.56	403.345	810.735	1.00722	2.46e-15	1.78e-13	TXNIP
ncbi_101110090	3.48	2.01	2.09	2.77	0.8	0.75	0.59	0.52	2.5875	0.665	-1.96013	2.72e-15	1.96e-13	TPPP
ncbi_101123155	12.61	14.16	14.46	13.06	7	5.4	5.75	5.55	13.5725	5.925	-1.1958	4.22e-15	3e-13	MON1A
ncbi_101118611	2.79	1.93	2.19	2.46	5.12	4.22	5.57	4.37	2.3425	4.82	1.04098	5.05e-15	3.56e-13	HERC3
ncbi_114114097	4.79	5.01	5.03	6.01	1.51	1.58	1.52	1.88	5.21	1.6225	-1.68306	5.08e-15	3.56e-13	CRELD2
ncbi_101110290	4.46	3.2	4.29	3.75	0.98	1.72	1.32	1.26	3.925	1.32	-1.57215	5.84e-15	4.06e-13	MRAS
ncbi_101122940	2.16	3.13	2.72	1.51	8.56	5.29	8.98	8.44	2.38	7.8175	1.71575	6.17e-15	4.25e-13	A2M
ncbi_101104033	53.54	59.34	68.21	57.18	31.03	23.69	23.62	26.92	59.5675	26.315	-1.17864	6.39e-15	4.38e-13	PCOLCE
ncbi_101121656	12.48	14	13.83	14.19	5.85	7.19	6.97	7.03	13.625	6.76	-1.01116	6.48e-15	4.42e-13	HEG1
ncbi_443082	5.24	6.94	6.28	6.67	10.28	14.38	14.77	12.71	6.2825	13.035	1.05298	7.79e-15	5.27e-13	IRF2
ncbi_101115063	3.06	3.38	3.01	2.96	5.72	7.87	5.88	7.87	3.1025	6.835	1.13951	8.76e-15	5.87e-13	ATG13
ncbi_101116008	17.13	14.46	21.19	14.6	5.13	7.6	6.65	4.74	16.845	6.03	-1.48209	8.95e-15	5.97e-13	ALPK2
ncbi_101122886	1.06	0.91	1.13	0.87	2.07	2.06	3.15	2.7	0.9925	2.495	1.3299	9.19e-15	6.1e-13	TCP11L1
ncbi_101122020	0.56	0.19	0.38	0.31	1.33	1.61	1.43	1.27	0.36	1.41	1.96963	1.06e-14	6.98e-13	ATP6V0E2
ncbi_101119401	0.47	0.52	0.57	0.49	0.11	0.08	0.08	0.07	0.5125	0.085	-2.59202	1.08e-14	7.1e-13	COL22A1
ncbi_101109431	7.46	8.48	6.34	6.4	2.13	3.66	2.47	2.42	7.17	2.67	-1.42513	1.31e-14	8.5e-13	Ankrd52
ncbi_101110466	27.21	35.69	30.79	33.43	9.8	12.82	10.44	14.49	31.78	11.8875	-1.41867	1.45e-14	9.39e-13	FADS3
ncbi_101109434	4.97	5.64	5.63	4.54	2.19	2.53	2.36	2.32	5.195	2.35	-1.14446	1.66e-14	1.07e-12	KIF3C
ncbi_101120358	18.58	19.97	21.74	19.27	10.43	9.16	10.32	8.64	19.89	9.6375	-1.04531	2e-14	1.28e-12	SLC25A1
ncbi_101107068	1.18	1.28	1.42	1.53	0.48	0.5	0.55	0.46	1.3525	0.4975	-1.44286	2.06e-14	1.32e-12	UNC5B
ncbi_100216465	566.53	550.21	499.9	537.18	297.26	246.54	285.71	223.58	538.455	263.272	-1.03227	2.09e-14	1.33e-12	ATF4
ncbi_101119132	5.17	7.12	6.31	5.72	1.98	2.21	1.32	2.24	6.08	1.9375	-1.64988	2.16e-14	1.37e-12	AEBP1
ncbi_101122067	24.47	31.41	28.89	31.74	13.75	8.33	12.26	10.18	29.1275	11.13	-1.38793	2.36e-14	1.49e-12	CCDC80
ncbi_101112461	1.7	1.39	1.68	1.44	2.85	3.23	3.79	2.97	1.5525	3.21	1.04798	2.57e-14	1.62e-12	Stx12
ncbi_101102807	14.98	18.85	18.23	19.39	4.83	8.21	5.85	5.52	17.8625	6.1025	-1.54946	2.97e-14	1.85e-12	CD320
ncbi_101107282	3.85	3.56	3.95	3.45	2.12	1.78	1.65	1.69	3.7025	1.81	-1.03251	3.75e-14	2.29e-12	FRAS1
ncbi_101122234	10.11	9.97	10.89	10.6	4.31	4.63	4.26	5.21	10.3925	4.6025	-1.17505	4.66e-14	2.79e-12	CDC42EP2
ncbi_101103115	121.91	147.47	138.51	152.83	76.36	54.42	59.72	53.45	140.18	60.9875	-1.2007	4.93e-14	2.93e-12	MCRIP2
ncbi_101117812	23.25	26.57	22.79	28.15	12.54	12.52	11.7	12.33	25.19	12.2725	-1.03742	5.17e-14	3.07e-12	STK40
ncbi_105609832	0.39	0.23	0.45	0.42	1.67	1.22	1.91	1.38	0.3725	1.545	2.05229	5.44e-14	3.2e-12	MOSPD1
ncbi_101104991	0.49	0.82	0.6	0.8	0.2	0.14	0.11	0.15	0.6775	0.15	-2.17526	6.2e-14	3.62e-12	FBN2
ncbi_100170327	12.72	19.06	20.49	15.32	6.95	6.91	7.13	6.21	16.8975	6.8	-1.3132	6.98e-14	4.04e-12	FASN
ncbi_101103207	191.18	199.97	190.46	180.78	98.15	54.59	69.2	77.06	190.597	74.75	-1.35038	9.38e-14	5.39e-12	SYPL2
ncbi_101107094	6.52	7.73	6.98	8.31	19.49	13.85	13.02	19.83	7.385	16.5475	1.16394	1.02e-13	5.82e-12	ARRDC3
ncbi_101114648	1.74	1.21	1.56	1.48	2.82	4.31	4.06	2.82	1.4975	3.5025	1.22583	1.04e-13	5.95e-12	FOXP1
ncbi_101118525	5.8	7.71	7.46	6.47	2.85	2.34	3.12	2.37	6.86	2.67	-1.36137	1.18e-13	6.68e-12	TLE2
ncbi_101110030	2.26	2.09	2.64	2.65	1.05	1	1.21	0.97	2.41	1.0575	-1.18838	1.27e-13	7.18e-12	ARHGEF9
ncbi_101105779	30.15	41.77	31.41	47.84	15.35	13.23	16.16	13.91	37.7925	14.6625	-1.36597	1.49e-13	8.36e-12	PPTC7
ncbi_101116095	35.14	26.24	30.75	36.53	49.99	70.52	87.97	72.49	32.165	70.2425	1.12685	1.53e-13	8.56e-12	LMOD3
ncbi_101118294	1.59	1.17	1.64	0.97	2.86	3.75	3.1	3.5	1.3425	3.3025	1.29864	1.62e-13	9.05e-12	PLA2G15
ncbi_114117545	0.4	0.29	0.49	0.36	0.95	1.04	1.29	1.01	0.385	1.0725	1.47805	1.7e-13	9.45e-12	SPTLC3
ncbi_101115552	132.85	180.01	188.67	179.38	76.16	70.41	62.88	81.45	170.227	72.725	-1.22694	2.03e-13	1.13e-11	COL4A1
ncbi_101102599	95.02	102.22	107.23	110.15	58.1	39.14	47.51	45.59	103.655	47.585	-1.12321	2.13e-13	1.17e-11	PPP1R14B
ncbi_101111832	9.18	5.24	6.03	7.71	2.08	2.83	2.54	2.86	7.04	2.5775	-1.4496	2.14e-13	1.18e-11	FNIP2
ncbi_114110487	11.35	15.68	11.52	14.83	4.65	3.95	2.99	4.46	13.345	4.0125	-1.73373	2.21e-13	1.21e-11	Glrx5
ncbi_114114874	57.22	68.51	43.87	49.64	123.4	162.7	107.39	142.46	54.81	133.988	1.28959	2.29e-13	1.25e-11	RPL23
ncbi_443453	75.08	65.32	74.14	64.62	38.21	25.65	37.28	30.93	69.79	33.0175	-1.07979	2.61e-13	1.41e-11	CAMK2A
ncbi_101122913	3.12	4.75	4	4.37	0.98	1.26	1.11	0.83	4.06	1.045	-1.95798	2.81e-13	1.51e-11	CITED4
ncbi_105603239	1.47	1.4	1.55	1.71	0.33	0.54	0.46	0.44	1.5325	0.4425	-1.79214	2.98e-13	1.6e-11	C14orf132
ncbi_101122043	8.74	11.45	8.13	11.94	3.34	4.21	3.64	4.21	10.065	3.85	-1.38642	3.01e-13	1.61e-11	PLXNA2
ncbi_101104083	2.94	3.48	3.94	2.78	1.03	0.33	0.51	0.85	3.285	0.68	-2.27229	3.54e-13	1.88e-11	EMILIN3
ncbi_101115995	14.53	13.25	13.41	12.77	7.4	5.71	7.85	5.67	13.49	6.6575	-1.01884	3.64e-13	1.92e-11	NUDT3
ncbi_101121551	7.01	11.54	9.11	10.71	2.73	3.48	2.87	3.78	9.5925	3.215	-1.57709	4.14e-13	2.18e-11	DNAJA4
ncbi_101123278	2.43	2.29	2.91	2.4	5.96	4.5	6.65	4.28	2.5075	5.3475	1.09261	4.15e-13	2.18e-11	ST6GALNAC6
ncbi_101119589	183.23	151.07	171.45	152.96	73.61	90.65	71.99	89.23	164.678	81.37	-1.01707	4.26e-13	2.23e-11	Klhl40
ncbi_101122182	10.72	7.37	9.75	8.11	4.11	4.46	4.23	3.9	8.9875	4.175	-1.10614	5.54e-13	2.89e-11	Aif1l
ncbi_101105634	8.11	6.15	7.66	7.71	11.67	20.06	22.02	16.4	7.4075	17.5375	1.24338	5.66e-13	2.94e-11	CLK1
ncbi_101114717	1.24	1.47	1.76	1.33	0.44	0.41	0.54	0.16	1.45	0.3875	-1.90378	5.79e-13	3e-11	PLEKHA6
ncbi_101108086	35.48	21.92	28.92	24.42	66.4	82.11	56.13	53.35	27.685	64.4975	1.22014	6.38e-13	3.28e-11	Hist1h2bc
ncbi_101109216	4.54	2.44	5.38	2.49	9.03	12.95	10.92	10.64	3.7125	10.885	1.55188	6.68e-13	3.42e-11	FAH
ncbi_101116585	16.17	30.25	25.16	31.86	7.6	4.18	9.54	6.22	25.86	6.885	-1.90919	7.42e-13	3.76e-11	ANKRD10
ncbi_101118136	1.79	2.26	1.9	1.83	0.76	0.38	0.5	0.4	1.945	0.51	-1.9312	7.74e-13	3.91e-11	ASPHD2
ncbi_101117815	2.18	2.59	3.28	1.71	0.48	0.76	0.27	0.62	2.44	0.5325	-2.19603	8.63e-13	4.33e-11	SH2B2
ncbi_101119044	18	17.44	17.1	17.11	9.98	8.49	7.63	8.67	17.4125	8.6925	-1.00228	9.1e-13	4.55e-11	Mgat4b
ncbi_101117806	0.72	0.33	0.48	0.59	1.96	1.46	1.64	2.01	0.53	1.7675	1.73765	9.58e-13	4.76e-11	TUFT1
ncbi_101110137	4.31	6.5	6.36	6.2	2.24	2.44	2.28	2.4	5.8425	2.34	-1.32008	1.01e-12	4.97e-11	VAV2
ncbi_106991683	3.92	3.4	3.64	3.7	1.77	1.69	1.49	1.35	3.665	1.575	-1.21846	1.08e-12	5.29e-11	PHETA1
ncbi_101111783	17.6	20.94	18.56	22.31	8.58	8.2	11.23	7.25	19.8525	8.815	-1.17129	1.11e-12	5.41e-11	TLE4
ncbi_443077	13.13	13.82	13.27	17.83	5.12	6.89	4.86	6.44	14.5125	5.8275	-1.31635	1.17e-12	5.68e-11	NOS3
ncbi_101114420	0.03	0.04	0.03	0.1	0.29	0.57	0.76	0.24	0.05	0.465	3.21723	1.21e-12	5.85e-11	TFCP2L1
ncbi_101118274	0.96	1.07	1.47	0.89	0.26	0.08	0.28	0.1	1.0975	0.18	-2.60815	1.23e-12	5.94e-11	ELOVL6
ncbi_101117867	28.71	21.79	21.18	26	12.4	11.8	10.77	11.89	24.42	11.715	-1.05971	1.29e-12	6.19e-11	SAE1
ncbi_101106106	2.96	1.81	2.86	2.26	5.88	4.01	6.06	5.94	2.4725	5.4725	1.14623	1.3e-12	6.21e-11	PGM2L1
ncbi_101110108	8.89	9.46	8.96	7.56	3.84	1.86	1.89	1.97	8.7175	2.39	-1.8669	1.33e-12	6.34e-11	ST8SIA5
ncbi_101103249	15.54	37.55	22.41	33.67	59.15	99.07	92.29	79.17	27.2925	82.42	1.59449	1.66e-12	7.91e-11	SLC43A2
ncbi_101122213	10.86	9.37	13.66	9.19	5.31	3.06	3.94	3.67	10.77	3.995	-1.43075	2.25e-12	1.05e-10	MMP15
ncbi_101115445	58.36	53.28	78.41	59.6	27.16	23.48	20.13	31.13	62.4125	25.475	-1.29275	2.26e-12	1.05e-10	ITGA7
ncbi_101118461	0.25	0.37	0.26	0.16	0.88	1.4	1.01	1.19	0.26	1.12	2.10692	2.39e-12	1.1e-10	KIF18B
ncbi_101119609	1.1	0.51	1.3	0.84	2.46	2.42	2.75	2.55	0.9375	2.545	1.44078	2.57e-12	1.18e-10	FAM13C
ncbi_101116664	0.5	0.61	0.24	0.67	1.83	1.75	1.63	2.28	0.505	1.8725	1.89061	3.18e-12	1.45e-10	TNFRSF19
ncbi_100125351	2.64	2.06	2.56	2.07	0.29	0.66	0.79	0.34	2.3325	0.52	-2.16529	3.54e-12	1.61e-10	SQLE
ncbi_101120120	6.05	3.5	3.85	4.58	9.05	8.52	11	8.47	4.495	9.26	1.04269	3.75e-12	1.69e-10	ANO5
ncbi_101107546	8.67	10.24	10.24	10.54	3.95	3.88	3.32	4.91	9.9225	4.015	-1.3053	4.04e-12	1.81e-10	RNF166
ncbi_101110967	29.13	31.9	35.37	37.3	15.27	16.35	15.45	17.72	33.425	16.1975	-1.04516	4.15e-12	1.85e-10	CAVIN3
ncbi_101111105	1	1.12	1.29	1.21	2.92	3.31	2.57	3.8	1.155	3.15	1.44746	4.58e-12	2.03e-10	PM20D2
ncbi_101110707	1.95	1.47	1.71	2.1	3.69	3.94	5.85	4.23	1.8075	4.4275	1.2925	5.11e-12	2.25e-10	TMEM116
ncbi_101113261	0.17	0.63	0.36	0.21	0	0	0	0	0.3425	0.001	-8.41996	5.32e-12	2.33e-10	IL34
ncbi_101109631	7.91	7.58	9.06	8.17	3.68	3.58	3.72	4.24	8.18	3.805	-1.1042	5.34e-12	2.34e-10	FBLIM1
ncbi_106991578	6.72	5.24	6.23	5.32	0.93	2.07	0.93	2.1	5.8775	1.5075	-1.96304	5.93e-12	2.57e-10	MAF
ncbi_101104160	14.3	13.04	15.39	15.57	6.72	7.7	6.08	8.06	14.575	7.14	-1.0295	6.12e-12	2.64e-10	TNFAIP1
ncbi_101112473	11.88	15.03	13.26	13.9	6.17	6.85	6.95	5.74	13.5175	6.4275	-1.0725	6.15e-12	2.64e-10	REXO4
ncbi_101122038	1.22	1.01	0.98	0.97	0.21	0.35	0.27	0.28	1.045	0.2775	-1.91294	6.15e-12	2.64e-10	Fgf11
ncbi_101111715	9.91	5.9	8.08	6.43	3.53	3.11	2.5	2.35	7.58	2.8725	-1.39989	6.19e-12	2.65e-10	IGDCC4
ncbi_101111189	1.93	1.63	1.99	1.11	3.25	3.99	4.28	3.45	1.665	3.7425	1.16848	6.87e-12	2.92e-10	MTURN
ncbi_101106128	0.64	0.6	0.82	0.62	0.14	0.24	0.21	0.21	0.67	0.2	-1.74416	7.52e-12	3.19e-10	ADAM12
ncbi_101101999	1.63	1.54	2.18	1.34	4.13	2.97	4.66	3.42	1.6725	3.795	1.18209	8.06e-12	3.41e-10	FBXL20
ncbi_101108164	407.7	556.86	522.1	444.2	209.64	240.02	202.38	244.55	482.715	224.148	-1.10672	8.42e-12	3.55e-10	HSPB8
ncbi_101123070	8.44	15.09	11.18	15.05	4.72	4.26	5.06	4.15	12.44	4.5475	-1.45184	9.28e-12	3.89e-10	TMEM120B
ncbi_101109397	5.53	9	5.62	8.82	18.67	20.28	18.54	16.11	7.2425	18.4	1.34515	9.45e-12	3.95e-10	HIST1H1D
ncbi_101120892	1.89	2.17	2.35	2.55	4.57	6.63	5.14	6.13	2.24	5.6175	1.32643	9.52e-12	3.97e-10	HMGB2
ncbi_101105498	2.23	1.82	1.72	1.71	0.47	0.7	0.82	0.42	1.87	0.6025	-1.63401	1.12e-11	4.66e-10	ARL10
ncbi_101122471	14.15	14.34	17.79	15.26	8.32	5.44	5.87	7.1	15.385	6.6825	-1.20306	1.31e-11	5.37e-10	PI16
ncbi_101114607	245.62	210.32	216.28	242.59	101.32	92.89	61.78	110.06	228.702	91.5125	-1.32143	1.39e-11	5.7e-10	NMRK2
ncbi_101119928	6.02	7.91	7.57	6.45	3.2	1.99	2.85	2.43	6.9875	2.6175	-1.41659	1.4e-11	5.7e-10	MYPOP
ncbi_101123398	14.28	18.24	14.83	17.28	8.3	6.15	6.05	7.02	16.1575	6.88	-1.23172	1.41e-11	5.73e-10	CIAPIN1
ncbi_101114816	16.5	22.28	18.82	23.52	32.66	46.73	41.64	42.47	20.28	40.875	1.01116	1.56e-11	6.3e-10	ACACB
ncbi_101120209	5.35	3.89	4.33	3.94	8.78	8.34	11.62	6.97	4.3775	8.9275	1.02815	1.56e-11	6.3e-10	UBE2D1
ncbi_114114906	51.3	70.39	61.71	72.67	14.96	25.47	12.56	25.34	64.0175	19.5825	-1.7089	1.58e-11	6.34e-10	CALR
ncbi_101105210	12.61	11.78	16.17	8.78	5.43	4.09	4.6	4.7	12.335	4.705	-1.39049	1.63e-11	6.52e-10	KCNC4
ncbi_100302348	93.68	94.69	78.99	87.54	30.3	42.75	30.29	42.71	88.725	36.5125	-1.28095	1.63e-11	6.52e-10	PMP22
ncbi_101107449	3.47	2.2	2.68	1.9	5.91	4.69	6.6	5.61	2.5625	5.7025	1.15404	1.65e-11	6.57e-10	SLC2A12
ncbi_101119367	40.33	38.64	38.96	38.7	6.45	11.88	5.05	15.69	39.1575	9.7675	-2.00323	1.69e-11	6.74e-10	DNAJB5
ncbi_554324	4.31	2.46	3.35	3.93	0.48	1.31	0.97	0.95	3.5125	0.9275	-1.92108	1.75e-11	6.96e-10	FGFR3
ncbi_100302558	226.05	335.57	213.25	368.13	490.87	756.68	734.43	651.71	285.75	658.423	1.20426	1.83e-11	7.24e-10	ZFAND5
ncbi_101107621	52.68	90.47	51.58	101.8	208.17	629	505.17	420.33	74.1325	440.668	2.57151	1.88e-11	7.44e-10	PFKFB3
ncbi_101121742	7.74	2.54	3.91	5.29	15.11	42.2	38.53	28.59	4.87	31.1075	2.67527	2.03e-11	8.01e-10	ARID5B
ncbi_101105114	3.46	7.95	11.46	2.17	62.29	86.39	54.46	85.15	6.26	72.0725	3.52521	2.14e-11	8.39e-10	CYP4B1
ncbi_101105016	6.47	5.04	7.21	6.04	8.48	19.99	15.72	18.5	6.19	15.6725	1.34022	2.17e-11	8.49e-10	KIAA1217
ncbi_100187551	57.13	57.5	56.33	65.25	33.78	22.69	22.13	24.11	59.0525	25.6775	-1.20149	2.18e-11	8.52e-10	IGFBP6
ncbi_101121535	2.42	3.52	2.92	2.67	1.27	1.28	1.04	1.28	2.8825	1.2175	-1.2434	2.19e-11	8.52e-10	KCNB1
ncbi_101114153	2.54	1.02	1.77	1.19	5.47	3.26	5.91	5.24	1.63	4.97	1.60837	2.42e-11	9.35e-10	TNFSF10
ncbi_101119021	1.1	0.69	1.14	0.89	1.66	1.97	2.13	1.92	0.955	1.92	1.00753	2.5e-11	9.63e-10	PLEKHM3
ncbi_101108197	50.83	81.93	72.81	73	31.02	32.08	30.46	29.28	69.6425	30.71	-1.18126	2.76e-11	1.06e-09	NBL1
ncbi_101114076	1.57	1.42	1.45	1.39	0.47	0.37	0.6	0.47	1.4575	0.4775	-1.60992	2.9e-11	1.11e-09	GTF2IRD1
ncbi_443049	9.7	16.29	10.27	13.65	4.65	7.01	5.02	4.42	12.4775	5.275	-1.24209	2.94e-11	1.12e-09	PDXK
ncbi_101105592	36.64	48.34	49.91	41.19	23.96	15.88	18.88	19.63	44.02	19.5875	-1.16823	3.4e-11	1.28e-09	Jph2
ncbi_101112176	3.6	3.78	4.24	4.23	1.99	1.51	1.78	1.79	3.9625	1.7675	-1.1647	4.46e-11	1.66e-09	EIF1AD
ncbi_114109699	7.31	7.6	9.63	9.71	15.62	27.17	19.4	24.2	8.5625	21.5975	1.33476	4.48e-11	1.66e-09	HIST1H4A
ncbi_101110591	4.2	4.06	4.32	4.17	2.3	1.69	2.27	2.02	4.1875	2.07	-1.01646	4.79e-11	1.77e-09	SEC24D
ncbi_101120039	9.3	8.17	8.42	9.03	2.56	2.06	1.04	3.55	8.73	2.3025	-1.92278	5.25e-11	1.93e-09	DPH3
ncbi_101118915	1.2	0.75	0.78	1.15	2.36	2.55	2	2.06	0.97	2.2425	1.20905	5.51e-11	2.02e-09	ACAD11
ncbi_101122152	3.31	6.31	3.76	6.09	1.26	1.27	1.18	0.52	4.8675	1.0575	-2.20252	5.73e-11	2.08e-09	NANOS1
ncbi_101108689	0.19	0.29	0.18	0.19	0.8	0.65	0.64	1.01	0.2125	0.775	1.86673	6.15e-11	2.23e-09	TAOK3
ncbi_101105716	10.21	10.11	10.52	9.17	4.62	4.15	5.36	5.49	10.0025	4.905	-1.02804	6.79e-11	2.45e-09	HSD3B7
ncbi_101103276	1.98	2.35	2.17	2.58	0.83	0.65	0.98	0.91	2.27	0.8425	-1.42994	7.16e-11	2.57e-09	Ctps1
ncbi_101117423	1.17	1.25	0.59	1.37	2.97	2.49	3.77	2.91	1.095	3.035	1.47077	7.31e-11	2.63e-09	GANC
ncbi_101103256	37.88	21.45	26.54	32.48	10.52	14.67	12.56	12.54	29.5875	12.5725	-1.23472	7.6e-11	2.72e-09	THBD
ncbi_101112558	4.73	4.96	4.27	6.51	0.82	2.11	1.53	1.63	5.1175	1.5225	-1.749	7.68e-11	2.74e-09	IFRD1
ncbi_101116361	9.29	12.26	9.38	10.06	4.38	4.72	3.74	4.89	10.2475	4.4325	-1.20908	7.7e-11	2.74e-09	Rnf115
ncbi_101105782	6.96	6.59	8.05	9.03	3.46	3.61	2.88	2.74	7.6575	3.1725	-1.27125	7.76e-11	2.76e-09	CHCHD4
ncbi_101116910	0.27	0.21	0.28	0.39	0.77	0.74	1	0.83	0.2875	0.835	1.53821	8.41e-11	2.98e-09	TXNDC16
ncbi_101118642	1.79	2.38	2.21	2.53	0.82	1.1	0.97	0.84	2.2275	0.9325	-1.25625	8.42e-11	2.98e-09	ADAMTS12
ncbi_101108614	0.8	0.95	0.96	0.83	0.41	0.23	0.35	0.37	0.885	0.34	-1.38014	8.43e-11	2.98e-09	TENM4
ncbi_101109328	2.27	2.77	2.69	3.2	0.88	0.22	0.76	0.56	2.7325	0.605	-2.17521	9.49e-11	3.32e-09	SIM2
ncbi_101115200	2.68	2.35	2.3	2.63	6.97	3.57	6.14	5.29	2.49	5.4925	1.14132	1.08e-10	3.75e-09	TCP11L2
ncbi_101116218	29.03	74.31	37.22	66.7	13.58	16.04	15.17	14.96	51.815	14.9375	-1.79443	1.16e-10	4e-09	PKDCC
ncbi_101109432	61.33	86.46	57.79	112.44	17.46	32.54	28.2	24.88	79.505	25.77	-1.62535	1.36e-10	4.63e-09	EMP1
ncbi_101120568	2.01	1.41	2.12	1.51	0.81	0.49	0.54	0.66	1.7625	0.625	-1.4957	1.4e-10	4.74e-09	SLC35B4
ncbi_101106679	26.46	34.37	29.48	38.63	16.63	13.33	16.69	14.77	32.235	15.355	-1.06992	1.43e-10	4.83e-09	PODXL
ncbi_101114095	13.26	18.93	15.09	19.77	7.13	5.76	6.61	8.41	16.7625	6.9775	-1.26446	1.52e-10	5.13e-09	ACVRL1
ncbi_114110581	3311.82	2948.51	3840.51	1952.83	8479.43	5787.37	6064.79	6186.62	3013.42	6629.55	1.13751	1.53e-10	5.14e-09	GAPDH
ncbi_101101969	3.17	1.3	2.55	1.68	5.63	4.8	6.29	5.33	2.175	5.5125	1.34169	1.54e-10	5.17e-09	RASGRP3
ncbi_443158	18.21	20.54	24.87	18.93	7.56	2.3	7.36	4.83	20.6375	5.5125	-1.90449	1.56e-10	5.23e-09	MYOG
ncbi_443185	14.01	20	19.9	14.75	6.96	6.94	8.78	5.26	17.165	6.985	-1.29714	1.62e-10	5.4e-09	SCD
ncbi_101122630	12.87	15.53	14.14	15.28	6.68	7.4	7.19	6.75	14.455	7.005	-1.04511	1.65e-10	5.47e-09	RANBP1
ncbi_101118034	1.51	1.37	1.83	1.39	3.12	6.08	4.04	3.75	1.525	4.2475	1.4778	1.67e-10	5.53e-09	ZSWIM7
ncbi_101106954	0.42	0.43	0.62	0.59	0.13	0.03	0.15	0.1	0.515	0.1025	-2.32895	1.7e-10	5.59e-09	SDK2
ncbi_101103648	2.86	3.14	3.01	2.94	1.28	1.51	1.53	1.62	2.9875	1.485	-1.00848	1.74e-10	5.7e-09	NSD2
ncbi_101108933	5.02	4.45	5.24	4.5	2.64	1.77	2.07	1.77	4.8025	2.0625	-1.21939	1.74e-10	5.7e-09	FKBP10
ncbi_101104341	2.7	2.8	2.65	2.72	1.35	1.39	1.08	1.37	2.7175	1.2975	-1.06655	1.95e-10	6.34e-09	Slit3
ncbi_100141299	39.75	41.5	32.54	47.57	18.16	21.67	16.84	17.68	40.34	18.5875	-1.11788	1.98e-10	6.4e-09	CD9
ncbi_443278	45.94	63.42	44.37	73.48	138.36	111.78	155.11	100.54	56.8025	126.448	1.15451	2.3e-10	7.39e-09	UCP3
ncbi_443405	11.19	10.19	16.42	8.07	3.73	3.51	2.73	4.92	11.4675	3.7225	-1.62321	2.71e-10	8.62e-09	MYOD1
ncbi_443154	19.99	28.31	19.31	29.28	6.35	11.21	9.06	9.1	24.2225	8.93	-1.43962	2.79e-10	8.84e-09	HYAL2
ncbi_101104566	5.23	4.25	4.51	5.44	2.24	1.74	1.93	2.08	4.8575	1.9975	-1.28202	2.94e-10	9.29e-09	Psmd10
ncbi_101121726	3.53	2.67	2.64	3.54	7.32	5.25	6.81	5.9	3.095	6.32	1.02999	3.19e-10	1e-08	PIGK
ncbi_101120910	8.75	19.96	13.09	17.78	28.38	59.82	44.14	47.51	14.895	44.9625	1.59389	3.86e-10	1.2e-08	HMOX1
ncbi_101115232	0.74	1.07	0.84	0.99	4.26	1.63	3.1	2.74	0.91	2.9325	1.68819	3.89e-10	1.21e-08	PIK3IP1
ncbi_100145883	8.52	7.18	6.84	9.05	4.41	3.21	3.68	3.49	7.8975	3.6975	-1.09485	4.01e-10	1.24e-08	ARL1
ncbi_101113555	7.45	7.65	8.65	4.73	17.02	12.46	15.72	14.14	7.12	14.835	1.05906	4.1e-10	1.26e-08	PCCB
MSTRG.5006	0.77	1.12	0.92	1.58	0.35	0.17	0.26	0.29	1.0975	0.2675	-2.03661	4.12e-10	1.27e-08	--
ncbi_101116615	80	95.62	92.92	84.36	54.93	40.36	39.24	39.05	88.225	43.395	-1.02366	4.21e-10	1.29e-08	ESRRA
ncbi_101121865	12.17	9.63	10.44	13.76	5.68	5.16	5.94	4.92	11.5	5.425	-1.08394	4.23e-10	1.29e-08	MRPS31
ncbi_101110640	1.14	0.51	1.64	1.14	3.13	3.06	4.15	3.28	1.1075	3.405	1.62035	4.67e-10	1.43e-08	Pcbp3
ncbi_101109586	1.34	1.21	1.34	1.64	0.52	0.52	0.49	0.37	1.3825	0.475	-1.54128	4.82e-10	1.47e-08	GALNT17
ncbi_101110796	2.02	1.29	1.97	1.49	0.52	0.13	0.2	0.48	1.6925	0.3325	-2.34773	4.87e-10	1.48e-08	LRRN1
ncbi_101110418	0.47	0.1	0.37	0.16	1.85	0.96	1.48	1.49	0.275	1.445	2.39357	5.03e-10	1.52e-08	KBTBD13
ncbi_101104254	0.28	0.26	0.25	0.28	0.04	0.11	0.06	0.05	0.2675	0.065	-2.04103	5.93e-10	1.77e-08	DNAH2
ncbi_101113590	10.65	11.98	12.7	11.19	6.98	4.3	5.81	4.64	11.63	5.4325	-1.09816	6.02e-10	1.79e-08	ADAM19
ncbi_101113252	3.47	1.43	1.75	2.83	0.33	0.86	0.62	0.46	2.37	0.5675	-2.06219	6.26e-10	1.86e-08	MYH3
ncbi_101103837	5.88	9	5.96	9.73	2.14	3.34	3.21	2.45	7.6425	2.785	-1.45637	6.73e-10	2e-08	ABTB2
ncbi_101120439	2.59	2.3	3.21	2.16	4.24	8.68	5.78	6.21	2.565	6.2275	1.27969	6.93e-10	2.05e-08	SLC43A1
ncbi_443515	2.28	1.39	2.23	0.94	3.5	4.13	5.39	4.59	1.71	4.4025	1.36433	7.36e-10	2.16e-08	IGF1R
ncbi_101122329	1.51	0.5	0.43	1.07	0.07	0	0.09	0	0.8775	0.04	-4.45533	7.75e-10	2.26e-08	MAGED4
ncbi_101109116	4.83	4.67	6	5.17	1.13	2.32	2.4	2.04	5.1675	1.9725	-1.38944	8.02e-10	2.34e-08	CBFA2T3
ncbi_101107401	4.56	3.89	4.59	3.27	7.91	12.31	9.69	7.04	4.0775	9.2375	1.17982	8.28e-10	2.41e-08	GSTM1
ncbi_101115805	88.94	141.01	120.78	147.81	58.4	51.67	44.79	58.42	124.635	53.32	-1.22496	8.32e-10	2.41e-08	COL4A2
ncbi_100302075	70.89	94.45	71.09	86.12	114.07	324.97	207.41	236.57	80.6375	220.755	1.45292	9.31e-10	2.69e-08	Rasd1
ncbi_101118185	8.77	7.38	9.49	6.24	4.11	2.31	2.65	3.18	7.97	3.0625	-1.37987	9.52e-10	2.74e-08	HBEGF
ncbi_101101932	12.11	11.15	20.23	16.09	29.45	24.49	37.53	30.01	14.895	30.37	1.02782	9.62e-10	2.76e-08	FZD4
ncbi_100217405	7.25	8.87	9.01	7.55	4.7	3.76	3.69	3.49	8.17	3.91	-1.06317	9.78e-10	2.8e-08	SLC25A19
ncbi_101115990	1.13	2.35	1.49	2.72	3.79	7.82	6.87	5.33	1.9225	5.9525	1.63051	1.08e-09	3.07e-08	SETD7
ncbi_101108919	5.56	4.68	4.54	4.81	2.89	1.98	2.18	2.33	4.8975	2.345	-1.06246	1.1e-09	3.11e-08	HMGCR
ncbi_101117380	2.59	8.39	5.09	7.09	1.07	1.73	1.68	1.33	5.79	1.4525	-1.99503	1.14e-09	3.21e-08	LOXL4
ncbi_101121871	1.31	1.04	1.65	1.37	2.57	3.46	3.25	3.69	1.3425	3.2425	1.27218	1.34e-09	3.74e-08	SKAP1
ncbi_101115152	10.04	11.99	11.14	12.55	5.67	5.58	3.97	5.85	11.43	5.2675	-1.11764	1.38e-09	3.83e-08	PAK4
ncbi_101112990	1.48	1.47	2.12	1.75	0.73	0.59	0.35	0.51	1.705	0.545	-1.64544	1.43e-09	3.95e-08	ITGBL1
ncbi_101123388	31.95	37.39	32.71	35.33	19.23	8.75	12.13	13.87	34.345	13.495	-1.34768	1.46e-09	4.03e-08	KCNJ12
ncbi_101116017	5.73	6.94	5.63	7.16	3.43	2.66	3.46	2.85	6.365	3.1	-1.03789	1.63e-09	4.48e-08	SLC39A14
ncbi_101111917	13.44	13.6	14.25	12.19	7.84	6.2	6.92	5.41	13.37	6.5925	-1.0201	1.79e-09	4.87e-08	B3GAT3
MSTRG.5097	5.85	1.89	6.05	3.3	9.9	13.33	12.49	11.89	4.2725	11.9025	1.47811	1.95e-09	5.29e-08	PABPC1
ncbi_101122350	9.11	11.11	8.7	12.4	5.49	4.44	4.29	4.49	10.33	4.6775	-1.14303	1.96e-09	5.31e-08	WDR91
ncbi_101107981	13.46	7.37	12.29	10.59	4.71	3.86	4.12	5.17	10.9275	4.465	-1.29123	1.99e-09	5.39e-08	Tcf15
ncbi_101120960	10.25	7.05	8.29	8.09	4.18	4.23	4.1	3.2	8.42	3.9275	-1.10021	2.08e-09	5.61e-08	PLA2G7
ncbi_101118468	1.08	1.39	1.27	0.98	2.16	2.85	3.06	2.32	1.18	2.5975	1.13834	2.08e-09	5.61e-08	BBS2
ncbi_101108712	1.22	0.95	1.57	1.55	2.34	3.38	2.51	3.14	1.3225	2.8425	1.10389	2.3e-09	6.12e-08	UNK
ncbi_101107969	13.19	11.09	17.88	14.08	5.54	6.29	7.42	7.68	14.06	6.7325	-1.06238	2.33e-09	6.21e-08	LAMA4
ncbi_101120525	2.08	1.63	1.94	1.54	0.8	0.77	0.94	0.91	1.7975	0.855	-1.072	2.4e-09	6.35e-08	BRI3BP
ncbi_105607012	0.06	0.02	0.07	0.09	0.55	1.54	0.5	0.85	0.06	0.86	3.8413	2.74e-09	7.21e-08	--
ncbi_101111591	79.24	53.95	78.53	54.45	37.88	25.52	28.47	31.33	66.5425	30.8	-1.11135	2.81e-09	7.37e-08	SEMA6C
ncbi_101118140	43.1	65.72	47.59	67.74	14.87	28.07	20.39	21.31	56.0375	21.16	-1.40505	2.99e-09	7.82e-08	CLIC1
ncbi_101112041	1.19	0.85	0.53	0.77	1.72	3.16	2.56	2.31	0.835	2.4375	1.54555	3.12e-09	8.13e-08	MEIS1
ncbi_101113506	2.85	2.83	2.53	3.24	1.04	0.96	1.01	0.94	2.8625	0.9875	-1.53542	3.45e-09	8.9e-08	METTL21C
ncbi_101123434	2.17	3.38	2.62	3.91	0.89	0.97	0.32	0.75	3.02	0.7325	-2.04365	3.65e-09	9.42e-08	Foxo6
ncbi_101121464	0.56	0.4	0.54	0.3	0	0.02	0	0	0.45	0.005	-6.49185	3.75e-09	9.65e-08	ADGRF1
ncbi_101104150	1.74	1.83	1.86	1.77	3.9	4.4	4.4	2.6	1.8	3.825	1.08746	3.76e-09	9.65e-08	SOD3
ncbi_101121861	6.06	4.42	5.09	5.08	2.27	3.04	2.27	2.23	5.1625	2.4525	-1.07382	3.86e-09	9.88e-08	HSF2
ncbi_101104900	4.67	1.2	1.19	5	0.21	0.53	0.45	0.35	3.015	0.385	-2.96923	3.87e-09	9.89e-08	GDF11
ncbi_106990122	5.3	4.63	5.02	3.44	8.86	11.21	14.2	7.44	4.5975	10.4275	1.18147	4.33e-09	1.1e-07	PGFS
ncbi_101110947	4.34	5.57	4.67	5.73	2.82	1.6	1.53	2.03	5.0775	1.995	-1.34773	4.78e-09	1.21e-07	FNDC1
ncbi_101117499	33.62	35.99	34.18	41.54	13.3	20.56	16.14	19.41	36.3325	17.3525	-1.06612	4.86e-09	1.22e-07	--
ncbi_101106528	0.9	0.54	0.28	1.23	2.44	5.73	2.9	2.79	0.7375	3.465	2.23214	4.94e-09	1.24e-07	TRDC
ncbi_101113485	1.17	1.28	1.32	1.22	0.42	0.34	0.33	0.39	1.2475	0.37	-1.75344	4.96e-09	1.24e-07	MMP19
ncbi_114109346	9.75	11.69	8.31	14.24	2.73	2.9	5.65	1.86	10.9975	3.285	-1.74321	5.11e-09	1.27e-07	TPRA1
ncbi_101120611	4.07	3.75	4.29	3.6	2.26	1.91	1.91	1.77	3.9275	1.9625	-1.00092	5.17e-09	1.29e-07	POMGNT2
ncbi_114117869	7.51	7.04	6.21	8.83	2.73	3.4	3.63	3.43	7.3975	3.2975	-1.16567	5.63e-09	1.39e-07	ATP1B3
ncbi_443231	2.03	1.18	1.54	1.39	0.6	0.7	0.62	0.66	1.535	0.645	-1.25087	5.88e-09	1.45e-07	ADCYAP1R1
ncbi_101116299	7.63	5.41	5.23	7.07	2.21	2.64	1.61	3.07	6.335	2.3825	-1.41087	6.04e-09	1.49e-07	Mall
ncbi_101121716	6.14	6.36	8.28	5.67	2.97	3.35	2.77	3.74	6.6125	3.2075	-1.04375	6.25e-09	1.54e-07	SEMA3B
ncbi_101113583	4.4	4.1	4.79	3.85	2.32	1.67	1.71	2.17	4.285	1.9675	-1.12293	6.47e-09	1.58e-07	CYP51A1
ncbi_101122707	9.4	8.43	10.86	8.57	5.4	2.88	3.97	4.13	9.315	4.095	-1.18569	6.5e-09	1.59e-07	PLXDC1
ncbi_101113706	6.57	5.53	6.96	7.21	3.08	3.9	2.41	2.47	6.5675	2.965	-1.14731	6.76e-09	1.64e-07	TMEM63B
ncbi_443249	2.12	1.37	2.09	1.65	0.59	0.58	0.21	0.66	1.8075	0.51	-1.82543	7.19e-09	1.74e-07	SLC7A5
ncbi_101122042	2.1	3.36	3.03	2.71	1.32	1.08	0.9	1.1	2.8	1.1	-1.34792	7.26e-09	1.75e-07	Gpr153
ncbi_101122554	9.61	10.29	7.54	8.58	4.63	3.24	4.49	3.21	9.005	3.8925	-1.21003	8.19e-09	1.95e-07	CDK2AP1
ncbi_101104509	40.06	22.46	32.63	30.01	15.29	14.06	11.44	15.19	31.29	13.995	-1.16079	8.34e-09	1.98e-07	TMEM88
ncbi_101120093	2.89	3.49	3.04	3.3	0.88	1.05	0.7	0.74	3.18	0.8425	-1.91628	8.55e-09	2.03e-07	CCL2
ncbi_100034669	0.39	0.38	0.36	0.76	1.4	2.19	2.9	1.65	0.4725	2.035	2.10664	9.3e-09	2.2e-07	TAC1
ncbi_101112462	8.49	9.61	9.65	10.85	3.5	5.14	5.41	3.36	9.65	4.3525	-1.14868	9.32e-09	2.2e-07	MTA1
ncbi_101114701	0.9	1.34	1.44	0.65	0.19	0.11	0.14	0.21	1.0825	0.1625	-2.73586	9.94e-09	2.33e-07	Olfm2
ncbi_101117990	4.52	6.46	5.54	5.44	2.91	1.61	2.67	2.18	5.49	2.3425	-1.22876	1.08e-08	2.51e-07	ADGRA2
ncbi_105604848	5.2	5.23	5.03	5.87	3.08	2.23	3.13	1.86	5.3325	2.575	-1.05024	1.21e-08	2.8e-07	PKD1
ncbi_101112891	7.79	16.75	13.52	14.79	23.65	43.85	28.04	35.14	13.2125	32.67	1.30606	1.43e-08	3.28e-07	C4A
ncbi_443051	8.62	6.64	9.82	5.67	4.12	2.03	2.68	3.18	7.6875	3.0025	-1.35635	1.51e-08	3.45e-07	COL6A3
ncbi_101123490	1.27	0.9	1.87	1.57	3.04	4.45	3.04	3.39	1.4025	3.48	1.31109	1.57e-08	3.57e-07	BBC3
ncbi_101106340	1.85	1.78	1.92	1.91	1.02	0.99	0.7	0.83	1.865	0.885	-1.07543	1.57e-08	3.57e-07	DCLK1
ncbi_101117548	0.43	0.26	0.51	0.23	0.05	0.09	0.02	0.07	0.3575	0.0575	-2.63631	1.7e-08	3.85e-07	COL11A1
ncbi_101102373	1.71	1.42	1.58	2.58	0.71	0.49	0.81	0.77	1.8225	0.695	-1.39083	1.74e-08	3.92e-07	ZNF462
ncbi_101108051	1.23	1.07	1.94	0.5	2.66	3.41	4.2	3.57	1.185	3.46	1.54588	1.77e-08	3.98e-07	BMF
ncbi_101105836	16.79	22.29	17.84	22.51	11.32	7.75	10.49	8.15	19.8575	9.4275	-1.07474	1.77e-08	3.98e-07	MYOC
ncbi_101117527	100.69	75.32	67.68	99.1	48.58	26.31	34.1	38.07	85.6975	36.765	-1.22092	1.87e-08	4.19e-07	CYCS
MSTRG.11944	1.25	1.31	1.33	1.55	0.62	0.81	0.57	0.71	1.36	0.6775	-1.00531	1.88e-08	4.2e-07	--
ncbi_100192423	46.76	51.48	32.16	49.95	15.96	22.06	13.85	22.26	45.0875	18.5325	-1.28267	1.89e-08	4.21e-07	ODC1
ncbi_101118297	5	2.75	4.4	2.99	1.39	0.79	1.51	0.7	3.785	1.0975	-1.78607	1.89e-08	4.21e-07	SLC7A10
ncbi_101110430	0.02	0.03	0.03	0.01	0.18	0.46	0.38	0.12	0.0225	0.285	3.66297	2.16e-08	4.77e-07	CCDC40
ncbi_101110084	0.74	0.59	1.29	0.62	1.67	1.73	2.07	1.67	0.81	1.785	1.13993	2.21e-08	4.89e-07	TRPM4
ncbi_101114980	0.6	0.44	0.61	0.64	0.12	0.06	0.21	0.19	0.5725	0.145	-1.98122	2.33e-08	5.13e-07	ST8SIA2
ncbi_101102841	1.25	0.56	1.07	0.79	0.21	0.15	0.19	0.08	0.9175	0.1575	-2.54236	2.39e-08	5.23e-07	TMEM119
ncbi_106990117	1.81	0.95	1.69	0.93	2.77	5.35	3.95	3.19	1.345	3.815	1.50408	2.39e-08	5.24e-07	HLA-B
ncbi_101119069	33.5	46.76	29.26	51.89	15.45	17.63	17.23	19.89	40.3525	17.55	-1.20119	2.42e-08	5.3e-07	Tp53inp2
ncbi_101119334	3.59	1.71	3.57	2.25	5.25	5.78	6.46	5.24	2.78	5.6825	1.03144	2.45e-08	5.36e-07	JADE1
ncbi_101102411	2.57	2.67	4.11	2.19	0.74	1.09	0.81	0.98	2.885	0.905	-1.67258	2.48e-08	5.4e-07	GNAS
ncbi_100192433	2.22	1.65	2.08	1.27	3.4	6.71	4	6.07	1.805	5.045	1.48286	2.49e-08	5.42e-07	FCGR3
ncbi_101122654	0.46	0.47	0.78	0.63	2.87	1.14	1.86	1.55	0.585	1.855	1.66491	2.85e-08	6.14e-07	TFAP4
ncbi_101104473	3.73	2.39	4.66	2.94	1.27	0.97	1.08	1.34	3.43	1.165	-1.55788	2.89e-08	6.23e-07	RND1
ncbi_101113161	3.33	1.98	4.37	3.3	0.18	0.22	1.23	0.45	3.245	0.52	-2.64163	3.29e-08	6.98e-07	PYCR1
ncbi_101102434	2.69	2.05	2.65	1.64	3.61	6.17	4.68	5.14	2.2575	4.9	1.11806	3.39e-08	7.19e-07	ME3
ncbi_101123034	10.01	12.87	12.7	10.3	5.17	6.11	5.76	4.09	11.47	5.2825	-1.11857	3.59e-08	7.59e-07	Ddx39a
ncbi_101102533	0.11	0.03	0.05	0.18	0.59	0.38	0.61	0.62	0.0925	0.55	2.57191	3.7e-08	7.81e-07	SH2D4A
ncbi_101116566	6.25	8.56	8.11	7.93	3.4	3.89	4.4	3.71	7.7125	3.85	-1.00234	3.72e-08	7.86e-07	MFSD12
ncbi_101122702	30.11	17.62	21.85	18.71	12.45	10.46	11.37	9.4	22.0725	10.92	-1.01528	3.91e-08	8.22e-07	AZIN1
ncbi_101115907	1.72	3.22	1.56	2.74	5.98	7.31	7.07	4.75	2.31	6.2775	1.4423	3.97e-08	8.31e-07	PXMP2
ncbi_101121054	3.4	6.18	6.29	5.9	1.82	1.9	1.96	1.73	5.4425	1.8525	-1.5548	4.04e-08	8.45e-07	EEF1AKMT4-ECE2
ncbi_101111663	12.36	16.11	12.31	18.21	6.79	6.2	7.77	4.8	14.7475	6.39	-1.20658	4.33e-08	9.02e-07	MTFP1
ncbi_101121201	2.67	1.96	2.3	2.37	4.19	9.58	4.41	6.87	2.325	6.2625	1.42951	4.38e-08	9.09e-07	UBE2L6
ncbi_101116914	1.19	1.24	1.18	1.17	2.21	2.94	2.98	2.42	1.195	2.6375	1.14216	4.52e-08	9.34e-07	JMJD7
ncbi_101115993	11.57	13	10.63	11.39	7.09	4.85	4.48	3.63	11.6475	5.0125	-1.21642	4.64e-08	9.56e-07	DET1
ncbi_101104361	24.61	54.15	45.06	42.67	65.36	121.32	122.49	91.66	41.6225	100.207	1.26755	4.7e-08	9.64e-07	APOD
ncbi_101118347	1.38	1.88	2.3	1.45	0.6	0.44	0.66	0.63	1.7525	0.5825	-1.58908	4.78e-08	9.76e-07	FBLN7
ncbi_100101231	348.09	295.43	329.54	323.79	125.22	36.24	59.98	79.82	324.212	75.315	-2.10593	5.28e-08	1.07e-06	COL3A1
ncbi_114113944	53.71	102.41	44.64	95.21	166.66	217.29	205.44	145.07	73.9925	183.615	1.31123	5.3e-08	1.08e-06	EEF1B
ncbi_101117733	1.09	0.22	1.73	0.6	2.61	1.67	2.56	1.63	0.91	2.1175	1.21842	6.19e-08	1.25e-06	DUSP19
ncbi_101111322	2.02	1.46	0.96	2.58	4.12	4.93	5.97	3.25	1.755	4.5675	1.37993	6.36e-08	1.28e-06	CRBN
ncbi_101114109	2.12	1.38	1.92	1.65	0.8	0.9	0.98	0.75	1.7675	0.8575	-1.0435	6.44e-08	1.29e-06	Lsm11
ncbi_101104046	0.66	0.42	0.36	0.24	2.41	1.14	2.15	0.87	0.42	1.6425	1.96743	6.51e-08	1.31e-06	SLC19A3
ncbi_101115044	29.89	14.02	26.34	17.2	45.44	48.89	36.05	49.5	21.8625	44.97	1.0405	6.84e-08	1.37e-06	CCL14
MSTRG.11228	1.15	0.67	0.94	0.94	1.67	1.97	2.43	1.57	0.925	1.91	1.04605	6.85e-08	1.37e-06	--
ncbi_101115321	0.68	0.89	0.62	1.08	1.28	3.31	2.5	2.67	0.8175	2.44	1.57759	7e-08	1.4e-06	C2
ncbi_101109111	5.48	3.3	3.99	3	8.17	9.2	8.09	6.37	3.9425	7.9575	1.0132	7.39e-08	1.47e-06	PGFS
ncbi_101103503	0.53	0.39	1.15	0.27	1.08	2.28	3.29	2.82	0.585	2.3675	2.01686	7.47e-08	1.49e-06	AMPD3
ncbi_101119784	3.04	0.7	1.78	1.39	0.38	0.06	0.34	0.2	1.7275	0.245	-2.81783	7.5e-08	1.49e-06	Pkmyt1
ncbi_101119900	3.6	2.03	0.81	2.63	6.22	7.13	8.83	6.28	2.2675	7.115	1.64976	7.66e-08	1.51e-06	NT5C3A
ncbi_100125616	0.87	0.9	1.08	0.56	0	0.09	0.05	0.03	0.8525	0.0425	-4.32617	7.74e-08	1.53e-06	TNMD
ncbi_101111398	0.44	0.65	0.35	0.56	1.88	1.21	1.3	1.21	0.5	1.4	1.48543	7.91e-08	1.56e-06	PHF7
ncbi_101101900	1.26	1.24	1.52	1.22	0.49	0.78	0.66	0.68	1.31	0.6525	-1.00552	8.03e-08	1.58e-06	FREM2
ncbi_101110839	0.28	0.47	0.44	0.52	0.04	0.1	0.11	0.13	0.4275	0.095	-2.16993	8.17e-08	1.6e-06	KCTD16
ncbi_101114080	0.11	0.08	0.16	0.08	0.34	0.49	0.4	0.32	0.1075	0.3875	1.84986	8.54e-08	1.66e-06	HUNK
ncbi_101112127	0.22	0.22	0.13	0.12	0.41	0.92	0.45	0.78	0.1725	0.64	1.89148	8.81e-08	1.71e-06	VWA3B
ncbi_101107949	4.29	3.88	4.76	5.17	2.61	1.76	1.72	2.12	4.525	2.0525	-1.14054	8.95e-08	1.74e-06	CERCAM
ncbi_101102121	1.25	0.72	1.02	1	0.28	0.29	0.14	0.38	0.9975	0.2725	-1.87206	9.14e-08	1.77e-06	TRMT9B
ncbi_101118356	0.99	0.73	1.04	0.74	0.38	0.44	0.43	0.38	0.875	0.4075	-1.10248	9.19e-08	1.77e-06	Adgrl1
ncbi_654334	2.61	3.52	3.02	3.68	1.27	1.5	1.8	1.36	3.2075	1.4825	-1.11342	9.55e-08	1.84e-06	SLCO2A1
ncbi_101111519	0.27	0.18	0.28	0.18	0.49	0.46	0.59	0.43	0.2275	0.4925	1.11426	9.85e-08	1.89e-06	RFX3
ncbi_100180629	16.77	17.76	19.63	15.37	11.06	7.36	6.44	7.71	17.3825	8.1425	-1.09409	1.03e-07	1.97e-06	TSPAN9
ncbi_101108059	23.02	22.75	22.55	19.87	14.77	8.34	10.44	9.29	22.0475	10.71	-1.04166	1.04e-07	1.98e-06	PTDSS1
ncbi_101102456	0.05	0.07	0.08	0.09	0.15	0.28	0.25	0.22	0.0725	0.225	1.63387	1.1e-07	2.09e-06	SLC24A2
ncbi_101116877	0.26	0.23	0.25	0.16	0.63	0.71	0.64	0.72	0.225	0.675	1.58496	1.2e-07	2.27e-06	GOLGA7B
ncbi_101121444	10.6	13.11	12.82	12.66	6.86	3.36	5.81	6.19	12.2975	5.555	-1.14651	1.24e-07	2.32e-06	LAMA5
ncbi_443243	1.79	1.24	1.86	1.7	0.75	0.63	0.58	0.75	1.6475	0.6775	-1.28199	1.24e-07	2.32e-06	CHRD
ncbi_101109030	2.66	3.62	2.95	4.18	1.29	1.57	1.15	1.65	3.3525	1.415	-1.24444	1.25e-07	2.33e-06	LRRN2
ncbi_101108671	2.57	2.39	2.47	2.34	1.17	0.38	0.73	0.52	2.4425	0.7	-1.80293	1.25e-07	2.33e-06	P3H4
ncbi_101114984	0.09	0	0.05	0.05	0.55	0.5	0.83	0.4	0.0475	0.57	3.58496	1.29e-07	2.41e-06	SPATS1
ncbi_114116678	3.64	2.32	3.63	3.06	1.19	1.65	1.23	1.09	3.1625	1.29	-1.29369	1.31e-07	2.44e-06	Arhgef7
ncbi_101115976	0.02	0	0	0	0.12	0.68	0.29	0.45	0.005	0.385	6.26679	1.32e-07	2.45e-06	GCGR
ncbi_101108694	3.18	3.16	2.58	3.07	1.72	0.9	1.46	1.37	2.9975	1.3625	-1.1375	1.38e-07	2.55e-06	PDE12
ncbi_114108605	1220.89	634.86	1295.6	624.36	254.34	448.54	326.15	394.49	943.928	355.88	-1.40729	1.41e-07	2.59e-06	HSPA1B
ncbi_101108793	6.81	8.04	7.4	7.51	4	3.34	2.53	3.99	7.44	3.465	-1.10245	1.43e-07	2.64e-06	UBTD1
ncbi_101106028	0.25	0.28	0.17	0.37	0.08	0.09	0.06	0.06	0.2675	0.0725	-1.88349	1.47e-07	2.71e-06	ZNF469
ncbi_101109533	1.84	1.11	1.63	0.96	0.52	0.54	0.74	0.37	1.385	0.5425	-1.35219	1.48e-07	2.71e-06	KIAA1549
ncbi_101118609	2.44	1.72	3.23	3.53	0.4	0.48	1.39	0.49	2.73	0.69	-1.98423	1.53e-07	2.8e-06	SAMD1
ncbi_101120418	0.36	0.39	0.72	0.33	0.03	0.11	0.06	0.02	0.45	0.055	-3.03242	1.61e-07	2.93e-06	WISP1
ncbi_101108952	2.06	2.55	2.38	2.83	0.94	1.19	1.39	1.09	2.455	1.1525	-1.09096	1.62e-07	2.96e-06	BNIP1
ncbi_101105550	0.37	0.82	0.75	0.69	0.12	0.16	0.18	0.08	0.6575	0.135	-2.28403	1.66e-07	3.02e-06	COL13A1
ncbi_101106802	1.2	0.76	1.48	1	0.44	0.29	0.3	0.34	1.11	0.3425	-1.69638	1.68e-07	3.04e-06	COL21A1
ncbi_101109405	0.18	0.07	0.06	0.13	0.29	0.36	0.5	0.34	0.11	0.3725	1.75974	1.71e-07	3.09e-06	STXBP5L
ncbi_101105128	21.09	36.76	26.01	40.71	12.57	15.09	11.99	13.99	31.1425	13.41	-1.21558	1.72e-07	3.12e-06	ADAM15
ncbi_101111346	1.26	1.49	1.11	2.02	0.23	0.42	0.1	0.36	1.47	0.2775	-2.40526	1.74e-07	3.14e-06	TMEM54
ncbi_114108606	0.82	0.5	1.03	0.55	0.04	0.06	0.16	0.14	0.725	0.1	-2.85798	1.82e-07	3.27e-06	SLC2A5
ncbi_101122655	0.5	0.29	0.58	0.32	0.08	0	0.09	0.08	0.4225	0.0625	-2.75702	1.83e-07	3.3e-06	KCNQ4
ncbi_443268	10.27	5.26	7.01	5.6	2.24	1.27	3.65	1.46	7.035	2.155	-1.70686	1.84e-07	3.31e-06	AQP4
ncbi_101118620	2.62	1.54	3.23	2.98	3.89	5.54	6.27	6.16	2.5925	5.465	1.07588	1.98e-07	3.53e-06	PHACTR2
ncbi_101120897	1.83	1.4	1.77	2.03	0.76	0.9	0.82	0.85	1.7575	0.8325	-1.078	2.01e-07	3.58e-06	ASAP3
ncbi_100144761	0.78	1.11	1.09	1.39	0.49	0.41	0.6	0.36	1.0925	0.465	-1.23233	2.12e-07	3.75e-06	CDK6
ncbi_101119080	5.46	6.24	5.46	7.18	2.26	3.11	2.68	3.68	6.085	2.9325	-1.05313	2.14e-07	3.78e-06	ADAMTS9
ncbi_114113217	0.19	0.06	0.13	0.13	0.35	0.34	0.44	0.34	0.1275	0.3675	1.52725	2.18e-07	3.85e-06	Erbb4
ncbi_101116024	0.26	0.43	0.33	0.23	1.19	0.86	0.8	0.93	0.3125	0.945	1.59646	2.3e-07	4.06e-06	ARSD
ncbi_101122429	0.06	0.09	0.07	0.1	0.25	0.5	0.4	0.19	0.08	0.335	2.06609	2.42e-07	4.22e-06	LAMC3
ncbi_101108489	1.73	1.39	1.77	1.19	2.44	6.45	2.58	6.14	1.52	4.4025	1.53425	2.52e-07	4.38e-06	CXCL9
ncbi_101117854	0.57	0.39	0.61	0.71	1.18	1.78	1.54	1.87	0.57	1.5925	1.48226	2.54e-07	4.42e-06	TSNARE1
ncbi_101103475	1.26	0.44	0.78	0.72	0.06	0.21	0	0.12	0.8	0.0975	-3.03653	2.84e-07	4.9e-06	SNX24
ncbi_101102559	0.79	0.77	1.1	0.72	2.14	2.14	1.79	1.64	0.845	1.9275	1.18971	2.89e-07	4.96e-06	CERS4
ncbi_105614551	0.17	0.21	0.15	0.12	0.39	0.74	0.41	0.62	0.1625	0.54	1.73252	2.96e-07	5.08e-06	Tgtp2
ncbi_101108272	8.33	9.75	7.42	7.73	4.31	4.9	3.66	2.78	8.3075	3.9125	-1.08632	2.98e-07	5.1e-06	RHBDF1
ncbi_100127212	3.37	3.65	4.46	4.29	1.51	1.7	2.12	2.01	3.9425	1.835	-1.10333	3.01e-07	5.16e-06	ST3GAL4
ncbi_105604151	1.13	0.95	0.88	1	0.16	0.09	0.06	0.2	0.99	0.1275	-2.95693	3.24e-07	5.49e-06	--
ncbi_101106451	0.79	1.01	1.06	0.87	0.41	0.46	0.33	0.43	0.9325	0.4075	-1.1943	3.26e-07	5.53e-06	SNPH
ncbi_101123247	2.15	0.94	1.33	1.49	0.51	0.56	0.47	0.66	1.4775	0.55	-1.42565	3.36e-07	5.68e-06	PIK3R3
ncbi_101104118	0.6	0.67	1.13	0.33	0.15	0.04	0.06	0.08	0.6825	0.0825	-3.04836	3.52e-07	5.93e-06	NPTX2
ncbi_101122334	2.67	3.35	2.35	2.51	1.64	0.73	0.92	0.98	2.72	1.0675	-1.34937	3.66e-07	6.15e-06	BMP1
ncbi_443483	215.98	204.45	253.29	215.85	75.76	15.79	29.81	46.22	222.393	41.895	-2.40826	3.73e-07	6.25e-06	COL1A1
ncbi_100192425	36.58	30.24	32.13	33.57	22.98	13.21	14.94	14.65	33.13	16.445	-1.01049	3.75e-07	6.27e-06	SERPINF1
ncbi_101111288	0.67	0.53	0.89	0.36	1.12	2.01	2.6	1.28	0.6125	1.7525	1.51663	3.75e-07	6.27e-06	CA12
ncbi_101119811	0.14	0.07	0.14	0.16	0.29	0.34	0.32	0.39	0.1275	0.335	1.39366	3.82e-07	6.37e-06	CFAP54
ncbi_101104156	0.09	0.04	0.04	0.14	0.25	0.36	0.43	0.29	0.0775	0.3325	2.10109	4.02e-07	6.67e-06	HEATR4
ncbi_101103445	1.48	1.56	1.85	1.3	0.71	0.92	0.68	0.64	1.5475	0.7375	-1.06922	4.02e-07	6.67e-06	MTCL1
ncbi_101106003	0.69	0.43	0.66	0.51	1.06	1.15	1.29	1.47	0.5725	1.2425	1.1179	4.03e-07	6.67e-06	Prkar2b
ncbi_105616722	25.31	10.07	18.39	18.74	4.96	8.31	6.5	8.21	18.1275	6.995	-1.37378	4.14e-07	6.85e-06	SOX18
ncbi_101107643	17.22	11.8	13.36	14.35	9.14	5	6.34	5.65	14.1825	6.5325	-1.1184	4.21e-07	6.95e-06	GJA4
ncbi_101120812	3.11	4.47	4.83	3.86	1.49	1.72	1.8	1.16	4.0675	1.5425	-1.39887	4.42e-07	7.25e-06	LOXL2
ncbi_101122492	12.13	20.93	23.34	17.02	7.4	6.83	4.38	9.56	18.355	7.0425	-1.38201	4.59e-07	7.51e-06	Znf768
ncbi_101116950	0.59	0.52	0.61	0.43	0.26	0.09	0.18	0.14	0.5375	0.1675	-1.6821	4.78e-07	7.8e-06	IGSF10
ncbi_101104407	0.68	0.91	0.99	1.27	2.17	2.47	3.19	1.54	0.9625	2.3425	1.28319	4.88e-07	7.95e-06	ACOT2
ncbi_101105924	1.99	2.39	1.28	1.87	4.9	3.13	4.86	3.46	1.8825	4.0875	1.11857	5.08e-07	8.22e-06	OSR2
ncbi_101117657	5.62	1.87	4.32	3.37	11.22	8.12	6.35	11.55	3.795	9.31	1.29468	5.88e-07	9.41e-06	METTL7A
ncbi_101103576	5.56	2.47	4.31	3.92	7.27	8.26	9.34	7.81	4.065	8.17	1.00708	5.9e-07	9.44e-06	CEP85L
ncbi_101110963	11.27	19.39	15.45	16.19	4.32	8.63	7.56	6.01	15.575	6.63	-1.23215	6.03e-07	9.61e-06	PVR
ncbi_101106058	1	0.85	0.99	0.82	1.55	2.61	1.63	2.18	0.915	1.9925	1.12274	6.06e-07	9.65e-06	SP110
ncbi_114114041	2.13	2.24	1.49	1.9	0.29	0.78	0.56	0.69	1.94	0.58	-1.74193	6.22e-07	9.88e-06	MRPS35
ncbi_101120629	6.24	6.46	7.04	6.99	3.93	2.15	2.45	3.41	6.6825	2.985	-1.16266	6.39e-07	1.01e-05	TRIP6
ncbi_443512	226.33	211.72	261.33	206.77	96.54	28.74	44.38	54.34	226.537	56	-2.01625	6.39e-07	1.01e-05	COL1A2
ncbi_114110584	5.6	7	5.53	5.23	3.07	2.19	1.69	2.84	5.84	2.4475	-1.25466	6.39e-07	1.01e-05	DEXI
ncbi_106990245	0.27	0.29	0.44	0.43	1.18	0.72	1	0.93	0.3575	0.9575	1.42133	6.9e-07	1.08e-05	Sh3gl2
ncbi_101117969	17.18	17.5	17.21	14.37	10.1	5.09	8.67	7.69	16.565	7.8875	-1.0705	6.93e-07	1.08e-05	IMP3
ncbi_101112936	0.69	0.57	0.65	0.77	1.1	2.19	1.42	2.18	0.67	1.7225	1.36227	7.44e-07	1.16e-05	IFI16
ncbi_101107974	5.47	14.04	9.17	11.28	4.7	3.31	3.15	4.14	9.99	3.825	-1.38502	7.68e-07	1.19e-05	SPECC1
ncbi_101122401	4.8	6.52	5.36	5.24	2.47	3.25	3.08	1.76	5.48	2.64	-1.05364	7.83e-07	1.21e-05	ADCY9
ncbi_101114835	0.76	0.67	1	0.53	1.47	1.83	1.9	1.31	0.74	1.6275	1.13706	7.86e-07	1.21e-05	HSPBAP1
ncbi_101109805	0.94	0.84	1.29	0.87	1.95	1.41	2.8	1.84	0.985	2	1.0218	8.44e-07	1.3e-05	ZBTB1
ncbi_101114557	1.58	3.04	2.12	2.7	1.04	0.73	1.12	0.55	2.36	0.86	-1.45638	9.5e-07	1.44e-05	NPR3
ncbi_101112314	0.9	0.52	0.93	0.6	1.77	1.05	1.62	1.53	0.7375	1.4925	1.01702	9.98e-07	1.51e-05	ST8SIA4
ncbi_101121264	0.04	0.05	0.1	0.04	0.2	0.5	0.23	0.25	0.0575	0.295	2.35908	1.09e-06	1.64e-05	FAM184B
ncbi_101102320	27.48	38.13	25.6	42.14	13.34	17.6	13.74	18.34	33.3375	15.755	-1.08134	1.19e-06	1.77e-05	Sec14l1
ncbi_443058	1.65	1.3	0.69	0.53	0.2	0.08	0	0.1	1.0425	0.095	-3.45598	1.21e-06	1.79e-05	SPP1
ncbi_100048993	45.65	54.93	35.27	48.08	24.74	26.95	20.54	16.23	45.9825	22.115	-1.05606	1.25e-06	1.84e-05	ANXA2
ncbi_101119773	0.97	0.48	0.86	0.39	1.15	2.87	1.48	2.85	0.675	2.0875	1.62882	1.25e-06	1.85e-05	GBP7
ncbi_101113046	1.38	1.3	0.89	1.74	0.54	0.58	0.7	0.62	1.3275	0.61	-1.12183	1.28e-06	1.88e-05	PRUNE2
ncbi_101102144	5.97	5.62	5.45	4.65	2.72	2.05	2.85	2.86	5.4225	2.62	-1.04939	1.33e-06	1.94e-05	PDLIM4
ncbi_101122882	2.26	2.92	2.24	3.16	1.17	1.34	1.13	1.21	2.645	1.2125	-1.12528	1.37e-06	2e-05	Rdh13
ncbi_101117523	0.34	0.31	0.38	0.33	0.88	0.61	0.59	0.84	0.34	0.73	1.10236	1.39e-06	2.02e-05	DTL
ncbi_101116543	7.27	9.02	9.84	7.84	5.37	2.47	2.57	3.97	8.4925	3.595	-1.2402	1.4e-06	2.04e-05	MXRA5
ncbi_100144429	5.01	12.19	14.11	5.63	2.65	3.3	1.88	2.74	9.235	2.6425	-1.80521	1.43e-06	2.08e-05	MCT7
ncbi_101110786	4.73	4.32	5.56	5.37	2.19	2	2.2	2.62	4.995	2.2525	-1.14896	1.54e-06	2.22e-05	CPI17
ncbi_114112112	0.45	0.54	0.5	0.56	1.53	0.96	2.32	1.51	0.5125	1.58	1.6243	1.67e-06	2.4e-05	HSPBAP1
ncbi_443103	46.74	70.33	65.86	84.13	24.69	35.74	28.79	38.1	66.765	31.83	-1.0687	1.71e-06	2.45e-05	VEGFA
ncbi_101111445	0.56	0.96	0.57	0.67	0.03	0.2	0.04	0.2	0.69	0.1175	-2.55394	1.72e-06	2.47e-05	MYMK
ncbi_101115906	1.81	2.08	1.9	0.33	5.2	4.76	4.87	4.05	1.53	4.72	1.62526	1.76e-06	2.52e-05	PATZ1
ncbi_101108882	3.46	2.18	3.18	2.29	1.36	1.01	0.41	0.97	2.7775	0.9375	-1.5669	1.79e-06	2.56e-05	SPSB4
ncbi_101105654	0.4	0.14	0.2	0.5	0.83	2.07	0.79	1.98	0.31	1.4175	2.19301	1.88e-06	2.67e-05	CTXN3
ncbi_101121641	0.61	0.93	0.77	0.42	0.92	2.83	2.1	2.01	0.6825	1.965	1.52563	1.96e-06	2.77e-05	TMEM86A
ncbi_101107568	1.09	1.52	1.67	0.93	2.98	2.79	3.28	2.2	1.3025	2.8125	1.11057	2.05e-06	2.87e-05	ATP1B3
ncbi_105612818	2.69	3.28	3.53	3.77	1.74	1.63	1.1	1.76	3.3175	1.5575	-1.09086	2.07e-06	2.9e-05	Scarf2
ncbi_101112715	2.59	0.7	1.58	1.86	0.56	0.38	0.17	0.34	1.6825	0.3625	-2.21455	2.12e-06	2.96e-05	KERA
ncbi_101112745	2.67	5.43	3.55	4.69	1.18	1.95	1.21	1.58	4.085	1.48	-1.46474	2.17e-06	3.02e-05	ABI3
ncbi_101116446	0.72	0.44	0.92	0.45	0.11	0.1	0.04	0	0.6325	0.0625	-3.33914	2.21e-06	3.07e-05	NTN3
ncbi_101104842	0.28	0.14	0.14	0.05	1.37	0.43	1.2	0.47	0.1525	0.8675	2.50805	2.29e-06	3.17e-05	FMO2
ncbi_100187549	20.17	24.33	18.44	22.32	7.14	13.19	10.15	10.66	21.315	10.285	-1.05133	2.29e-06	3.17e-05	HPCAL1
ncbi_101123036	0.11	0.12	0.18	0.08	0.33	0.73	0.35	0.25	0.1225	0.415	1.76033	2.37e-06	3.28e-05	FSTL4
ncbi_101111126	0.74	0.77	0.91	0.8	1.01	2.27	1.61	1.81	0.805	1.675	1.0571	2.46e-06	3.39e-05	IL7R
ncbi_101118005	0.22	0.18	0.19	0.18	0.37	0.32	0.49	0.41	0.1925	0.3975	1.0461	2.5e-06	3.44e-05	CNTN1
ncbi_101123646	0.17	0.04	0.12	0.27	0.48	0.63	1.38	0.62	0.15	0.7775	2.37388	2.54e-06	3.48e-05	AFMID
ncbi_101116298	2.15	1.55	0.68	1.29	4.15	2.86	5.19	2.62	1.4175	3.705	1.38612	2.71e-06	3.69e-05	SULT1C4
ncbi_101103329	1.85	1.09	1.54	1.98	0.85	0.46	0.59	0.44	1.615	0.585	-1.46503	2.75e-06	3.75e-05	POSTN
ncbi_101103762	2.25	2.51	2.39	2.35	0.96	1.11	1.19	0.9	2.375	1.04	-1.19134	2.79e-06	3.8e-05	CAMK1
ncbi_101116121	0.78	0.54	0.75	0.38	1.04	1.83	1.7	1.13	0.6125	1.425	1.21818	2.82e-06	3.83e-05	CYP4V2
ncbi_101110645	1.82	2.23	2.54	2.31	0.75	1.18	1.19	1.18	2.225	1.075	-1.04947	2.86e-06	3.88e-05	PALD1
ncbi_101120732	2.32	1.5	2.53	1.13	0.28	0	0.66	0.06	1.87	0.25	-2.90304	2.89e-06	3.92e-05	ARMCX6
ncbi_101107994	1.36	0.79	1.4	1.19	0.53	0.45	0.47	0.59	1.185	0.51	-1.21632	3.02e-06	4.08e-05	ADAMTS16
ncbi_101113348	0.38	0.37	0.39	0.24	0.13	0.03	0.07	0.11	0.345	0.085	-2.02106	3.05e-06	4.12e-05	CNTN2
ncbi_101123098	0.4	0.11	0.31	0.51	0.93	0.96	1.27	0.83	0.3325	0.9975	1.58496	3.08e-06	4.15e-05	RFTN2
ncbi_101121454	10.76	11.4	10.84	12.39	14.54	32.18	17.6	29.94	11.3475	23.565	1.05427	3.26e-06	4.37e-05	SERPING1
ncbi_101121661	3.19	1.72	1.14	2.11	4	3.49	5.77	3.75	2.04	4.2525	1.05974	3.27e-06	4.39e-05	AADAT
ncbi_101114623	0.27	0.19	0.3	0.29	0.91	0.59	1.37	0.51	0.2625	0.845	1.68663	3.35e-06	4.48e-05	CYSLTR2
ncbi_101113217	10.84	10.78	11.11	10.56	14.41	70.6	36.97	50.35	10.8225	43.0825	1.99307	3.44e-06	4.6e-05	HLA-A
ncbi_101115040	3.69	2.44	1.59	3.3	4.2	6.45	7.04	6.2	2.755	5.9725	1.11628	3.7e-06	4.92e-05	DECR1
ncbi_105603547	4.36	2.97	4.22	2.5	1.76	1.64	1.3	1.67	3.5125	1.5925	-1.1412	3.75e-06	4.98e-05	SLC26A6
ncbi_101121414	2.35	2.7	2.62	1.78	1.04	0.89	0.39	0.79	2.3625	0.7775	-1.6034	3.85e-06	5.08e-05	APOL3
ncbi_101110066	36.38	44.44	31.39	29.09	21.19	14.26	18.99	15.81	35.325	17.5625	-1.00819	4.08e-06	5.34e-05	COX7A2
ncbi_101102282	0.83	0.46	0.49	0.61	0.15	0.27	0.24	0.21	0.5975	0.2175	-1.45792	4.08e-06	5.34e-05	GLIS2
ncbi_101109794	5.3	6.48	5.88	7.07	3.62	2.72	2.32	2.71	6.1825	2.8425	-1.12103	4.11e-06	5.38e-05	MPV17L2
ncbi_101108683	1.44	1.26	1.17	1.08	0.78	0.39	0.45	0.49	1.2375	0.5275	-1.23019	4.18e-06	5.46e-05	TUB
ncbi_101106623	0.29	0.12	0.16	0.12	0.58	0.3	0.49	0.53	0.1725	0.475	1.46133	4.26e-06	5.55e-05	ARHGAP20
ncbi_780518	1.26	0.98	1.81	1.11	0.32	0.57	0.42	0.64	1.29	0.4875	-1.4039	4.42e-06	5.73e-05	CLMP
ncbi_101111588	0.75	1.02	1.19	0.92	0.35	0.49	0.39	0.52	0.97	0.4375	-1.1487	4.71e-06	6.06e-05	PTPRF
ncbi_443484	33.3	29.77	28.64	29.79	20.62	8.35	14.04	12.47	30.375	13.87	-1.13092	4.71e-06	6.06e-05	HACD1
ncbi_101110051	0.18	0.21	0.17	0.15	0.28	0.55	0.54	0.39	0.1775	0.44	1.30968	4.74e-06	6.09e-05	FOXP2
ncbi_101107085	1.12	1.33	1.47	1	0.42	0.53	0.6	0.64	1.23	0.5475	-1.16773	5e-06	6.36e-05	Mief1
MSTRG.3776	0.09	0.47	0.22	0.37	0.95	3.31	3.06	0.99	0.2875	2.0775	2.85321	5.01e-06	6.38e-05	Igkc
ncbi_101106810	7.57	4.31	8.31	3.88	1.69	2.86	1.68	2.29	6.0175	2.13	-1.49831	5.27e-06	6.68e-05	CRABP2
ncbi_101123431	3.79	5.06	3.22	5.64	2.01	1.19	3.72	1.68	4.4275	2.15	-1.04216	5.36e-06	6.77e-05	ABCC5
ncbi_101116182	0.3	0.49	0.33	0.31	0.58	1.24	0.88	1.22	0.3575	0.98	1.45484	5.46e-06	6.88e-05	SLC38A3
ncbi_101111234	0.32	0.2	0.28	0.19	0.35	1.47	0.9	0.58	0.2475	0.825	1.73697	6.16e-06	7.71e-05	IRF4
ncbi_101103609	2.22	4.37	2.78	2.76	1.02	0.77	1.33	0.48	3.0325	0.9	-1.75251	6.46e-06	8.05e-05	Npm3
ncbi_101122001	0.98	0.44	0.67	0.77	1.33	1.87	1.4	2.35	0.715	1.7375	1.281	6.49e-06	8.08e-05	NOSTRIN
ncbi_100422803	7.53	50.31	14.43	49.86	5.09	3.55	4.79	4.08	30.5325	4.3775	-2.80217	6.9e-06	8.53e-05	Pitx3
ncbi_101108131	10.43	12.6	15.5	7.7	16.26	34.11	17.03	30.71	11.5575	24.5275	1.08557	7.04e-06	8.69e-05	C3
ncbi_101111633	3.1	3.72	3.74	3.84	1.71	1.42	2.48	1.13	3.6	1.685	-1.09525	7.45e-06	9.15e-05	NOA1
ncbi_101105076	1.48	1.72	1.54	2.72	0.73	0.91	0.78	0.83	1.865	0.8125	-1.19874	7.73e-06	9.45e-05	ADAMTS10
ncbi_101111183	2.32	4.39	3.57	3.45	1.52	1.55	1.97	1.37	3.4325	1.6025	-1.09894	7.89e-06	9.62e-05	ADAMTSL2
ncbi_101101920	13.84	12.43	5.29	12	21.96	40.84	57.02	27.16	10.89	36.745	1.75454	8.4e-06	0.000101688	SELENOP
ncbi_101121399	0.62	0.95	0.77	0.76	0.39	0.12	0.29	0.33	0.775	0.2825	-1.45595	8.44e-06	0.000102046	FREM1
ncbi_101120047	2.3	2.18	2.02	2.57	1.08	1.14	0.76	1.38	2.2675	1.09	-1.05677	8.96e-06	0.000107671	RASGEF1A
ncbi_101106358	2.12	1.75	2.11	2.44	0.9	1.39	0.94	0.94	2.105	1.0425	-1.01377	9.3e-06	0.000111234	DDX10
ncbi_101113133	1.6	1.63	2.09	1.68	0.48	0.79	0.85	0.89	1.75	0.7525	-1.21759	9.6e-06	0.000114382	HABP4
ncbi_101118722	1.99	1.97	1.91	2.43	1.15	0.73	1.3	0.69	2.075	0.9675	-1.10078	9.7e-06	0.000115488	MON1B
ncbi_114116662	0	0	0	0	0.62	0.19	0	0.75	0.001	0.39	8.60733	9.73e-06	0.000115766	MYCBP2
ncbi_101116226	0.52	0.32	0.23	0.34	0.68	1.22	2.61	0.47	0.3525	1.245	1.82045	9.76e-06	0.000115997	TCAF1
ncbi_114117353	4.77	4.34	4.79	5.87	2.18	1.76	1.74	2.59	4.9425	2.0675	-1.25735	1.02e-05	0.000120864	ENAH
ncbi_101106437	0.13	0.22	0.08	0.07	0.5	0.3	0.67	0.45	0.125	0.48	1.94111	1.06e-05	0.000124881	NT5DC1
ncbi_101120663	3.62	4.67	4.77	4.26	2.32	1.79	2.09	2.36	4.33	2.14	-1.01676	1.08e-05	0.000127233	MRI1
ncbi_101103014	8.54	19.81	12.3	18.54	5.59	7.08	7.25	6.7	14.7975	6.655	-1.15284	1.11e-05	0.000129697	ABHD2
ncbi_678673	1.65	1.58	0.85	1.52	4.4	1.96	4	3.53	1.4	3.4725	1.31055	1.22e-05	0.000141302	CLN6
ncbi_101110236	1.81	1.81	2.07	1.58	1.04	0.74	0.97	0.51	1.8175	0.815	-1.15708	1.22e-05	0.000141484	ARSI
ncbi_101117116	0.12	0.62	0.08	0.12	0.24	1.27	1.65	2.05	0.235	1.3025	2.47055	1.22e-05	0.000141484	TXNRD3
ncbi_101111955	0.07	0.08	0.15	0	0.61	0.43	0.34	0.45	0.075	0.4575	2.60881	1.23e-05	0.000142868	GPR19
ncbi_101110147	3.6	1.87	3.89	2.55	1.19	0.97	1.45	1.13	2.9775	1.185	-1.32921	1.27e-05	0.000146159	MTFMT
ncbi_101103800	19.02	19.52	15.06	25.04	4.22	9.64	11.1	9.64	19.66	8.65	-1.18449	1.31e-05	0.000150903	ROCK2
ncbi_101106773	0.16	0.04	0.19	0.1	0.27	0.65	0.54	0.33	0.1225	0.4475	1.86911	1.32e-05	0.000151499	CDKL2
ncbi_101117888	0.2	0.18	0.26	0.14	0.06	0	0	0.03	0.195	0.0225	-3.11548	1.34e-05	0.000153429	OPCML
ncbi_101103440	6.4	7.75	8.31	6.34	4.85	2.78	3.62	2.95	7.2	3.55	-1.02018	1.36e-05	0.000154751	PPOX
ncbi_101122928	0.92	0.81	1.31	0.92	0.54	0.16	0.22	0.31	0.99	0.3075	-1.68684	1.36e-05	0.000154803	EPHB2
ncbi_105602801	0.76	0.56	0.51	0.99	1.33	1.69	1.82	1.13	0.705	1.4925	1.08204	1.39e-05	0.00015852	NUDT6
ncbi_114114763	0.12	0.57	0.18	0.25	0	0	0	0	0.28	0.001	-8.12928	1.45e-05	0.000164178	ADAMTS2
ncbi_101103966	0.78	0.89	1.02	0.6	3.66	1.12	1.84	2.15	0.8225	2.1925	1.41449	1.47e-05	0.000165705	DERA
ncbi_101123651	0.38	0.26	0.33	0.24	0.83	0.66	1.29	0.63	0.3025	0.8525	1.49476	1.47e-05	0.000165856	2022-03-01
ncbi_101113122	0.02	0.01	0.08	0.01	0.04	0.77	0.11	0.91	0.03	0.4575	3.93074	1.53e-05	0.000172128	CD5L
ncbi_101111779	0.69	0.64	0.9	0.79	0.3	0.24	0.11	0.37	0.755	0.255	-1.56598	1.58e-05	0.000177124	IGSF1
ncbi_101105100	1.68	2.03	1.78	2.46	1.06	0.5	1.01	0.57	1.9875	0.785	-1.34019	1.62e-05	0.000180645	SLC35F2
ncbi_101110257	0.63	0.97	0.93	0.82	2.2	1.96	1.41	1.83	0.8375	1.85	1.14336	1.64e-05	0.000182435	SPTLC3
ncbi_101121435	0.69	0.18	0.36	0.24	1.44	0.79	2.17	0.92	0.3675	1.33	1.85561	1.68e-05	0.000186788	ASPA
ncbi_101112919	1.52	1.4	1.91	1.78	0.94	0.71	0.5	0.82	1.6525	0.7425	-1.15419	1.69e-05	0.000186939	CCM2L
ncbi_101120382	2.51	0.69	1.58	0.89	0.37	0.49	0.09	0.29	1.4175	0.31	-2.19301	1.69e-05	0.000187308	PSAT1
ncbi_101120909	0.37	0.27	0.22	0.28	0.68	0.67	0.45	0.81	0.285	0.6525	1.19502	1.69e-05	0.000187308	Cpne8
ncbi_101110624	0.31	0.5	0.5	0.5	0.14	0.06	0.22	0.17	0.4525	0.1475	-1.6172	1.71e-05	0.000189071	ADAMTS17
ncbi_101114500	0.02	0	0	0	0.2	0.41	0.39	0.22	0.005	0.305	5.93074	1.78e-05	0.000195329	NR0B2
ncbi_101116818	1.33	1.38	1.21	1.42	0.74	0.7	0.58	0.52	1.335	0.635	-1.07201	1.78e-05	0.000195715	Gpsm1
ncbi_101114768	0.28	0.21	0.26	0.19	0.09	0.03	0.02	0.05	0.235	0.0475	-2.30666	1.83e-05	0.000200932	KCNK12
ncbi_101120701	0.26	0.18	0.18	0.26	0.71	0.57	0.41	0.55	0.22	0.56	1.34792	1.95e-05	0.000212843	CYP39A1
ncbi_101106132	1.8	1.65	1.74	1.42	0.49	0.89	0.46	0.89	1.6525	0.6825	-1.27575	1.99e-05	0.000215905	Sox8
ncbi_101117632	0.57	0.5	0.88	0.3	1.72	1.18	1.44	1.13	0.5625	1.3675	1.28162	2.02e-05	0.000218988	PYROXD2
ncbi_101104971	3.3	3.99	4.45	3.09	2.35	0.7	1.58	0.94	3.7075	1.3925	-1.41277	2.06e-05	0.000222903	Fndc5
ncbi_101109209	0.05	0	0.04	0.01	0.2	0.36	0.39	0.14	0.025	0.2725	3.44626	2.07e-05	0.00022424	TTC12
ncbi_101105278	0.25	0.22	0.2	0.15	0.32	0.77	0.47	0.55	0.205	0.5275	1.36355	2.09e-05	0.000225678	Fyb1
ncbi_101122203	0.71	0.32	1.17	0.53	1.94	2.24	2.05	1.48	0.6825	1.9275	1.49783	2.11e-05	0.000228155	Armc7
ncbi_101109388	0.4	0.33	0.42	0.3	0.37	1.35	0.76	1.26	0.3625	0.935	1.36699	2.22e-05	0.000237837	GVINP1
ncbi_101117372	7.65	7.1	6.47	6.19	4.47	1.86	2.24	2.61	6.8525	2.795	-1.29378	2.27e-05	0.000242646	Lsm2
ncbi_101104720	0.09	0.06	0.03	0.09	0.16	0.31	0.41	0.24	0.0675	0.28	2.05247	2.29e-05	0.000244904	ARHGEF4
ncbi_101118337	1.72	2.88	3.19	2.69	0.47	1.21	0.75	1.47	2.62	0.975	-1.42609	2.39e-05	0.000253582	TNC
ncbi_101113711	0.23	0.54	0.37	0.56	0.1	0.1	0.08	0.14	0.425	0.105	-2.01707	2.42e-05	0.000256313	RIN1
ncbi_101105033	1.33	2.28	2.03	1.98	0.72	1.11	0.59	0.66	1.905	0.77	-1.30686	2.43e-05	0.000257506	SLC6A6
ncbi_101110262	0.1	0.2	0.12	0.11	0	0	0	0	0.1325	0.001	-7.04985	2.46e-05	0.000260572	Dpf1
ncbi_101122252	0.87	0.37	0.69	0.73	0.23	0.33	0.31	0.23	0.665	0.275	-1.27392	2.56e-05	0.00026873	CERS6
ncbi_780455	0.29	0.34	0.37	0.22	0.86	0.58	0.61	0.68	0.305	0.6825	1.16202	2.58e-05	0.000270485	CASP14
ncbi_101121628	2.01	1.25	1.39	1.54	0.77	0.44	0.78	0.53	1.5475	0.63	-1.29652	2.63e-05	0.000275751	MSMO1
ncbi_101106107	3.55	1.87	3.12	2.76	1.32	1.4	1.92	0.99	2.825	1.4075	-1.00512	2.74e-05	0.00028476	Zc3h12c
ncbi_101102525	0.67	0.87	0.5	0.82	0.19	0.22	0.19	0.33	0.715	0.2325	-1.62071	2.78e-05	0.000288972	QTRT2
ncbi_101116675	0.55	0.7	0.95	0.59	0.24	0.1	0.21	0.26	0.6975	0.2025	-1.78427	2.83e-05	0.000293507	CACNG7
ncbi_101121954	3.42	4.21	3.5	4.08	1.83	1.8	2.51	1.36	3.8025	1.875	-1.02006	2.84e-05	0.00029416	PDSS1
ncbi_100196903	1.65	1.91	2.12	1.08	2.16	9.08	2.32	9.18	1.69	5.685	1.75014	2.84e-05	0.00029416	IDO1
ncbi_101117948	0.36	0.59	0.46	0.23	0.05	0.01	0.09	0.15	0.41	0.075	-2.45066	2.84e-05	0.00029416	Adam11
ncbi_101112248	1.3	1.52	1.53	1.78	0.64	0.64	0.77	0.85	1.5325	0.725	-1.07983	2.94e-05	0.000302282	EXOC3L1
ncbi_101121563	0.23	0.37	0.61	0.36	1.18	1.08	0.77	1.39	0.3925	1.105	1.49328	2.96e-05	0.000303784	CYP2J2
ncbi_114118292	0.22	0.3	0.91	0.67	1.33	1.62	2.24	1.48	0.525	1.6675	1.6673	3e-05	0.000307402	ART1
ncbi_101116189	1.28	0.15	0.26	0.72	1.29	4.27	3.4	1.93	0.6025	2.7225	2.1759	3.13e-05	0.000318533	BCCIP
ncbi_443133	7.1	7.74	9.4	6.7	4.28	1.38	2.67	4.34	7.735	3.1675	-1.28806	3.29e-05	0.000332224	IGFBP5
ncbi_101113931	2.01	2.81	2.97	4.14	1.34	1.13	0.18	0.7	2.9825	0.8375	-1.83236	3.31e-05	0.000333715	NR2F6
ncbi_101115351	0.73	0.62	0.61	0.55	0.23	0.36	0.17	0.2	0.6275	0.24	-1.38658	3.48e-05	0.000350039	SLC4A3
ncbi_101114735	0.54	0.66	0.71	0.77	0.1	0.1	0.32	0.14	0.67	0.165	-2.0217	3.54e-05	0.000356213	FAM181B
ncbi_101114272	0.67	0.39	0.56	0.47	1.44	1.59	2.54	0.81	0.5225	1.595	1.61005	3.57e-05	0.000358212	TECRL
ncbi_101107547	1.23	3.82	3.91	3.3	1.11	1.33	0.91	0.92	3.065	1.0675	-1.52165	3.66e-05	0.000366411	Cadm4
ncbi_114114762	2.03	1.88	2.6	2.22	1.02	0.29	0.86	0.61	2.1825	0.695	-1.6509	3.67e-05	0.000367769	ADAMTS2
ncbi_101103227	0.4	1.46	0.61	1.64	0.12	0.3	0.1	0.17	1.0275	0.1725	-2.57447	3.68e-05	0.000368503	Clec2h
ncbi_101113095	0.32	0.53	0.33	0.74	0.64	1.58	0.96	1.79	0.48	1.2425	1.37214	3.7e-05	0.000369755	SCN3B
ncbi_106990358	0.01	0.04	0	0	0.09	0.36	0.12	0.18	0.0125	0.1875	3.90689	3.76e-05	0.000374213	--
ncbi_101120768	1.12	1.2	1.36	0.81	0.59	0.55	0.45	0.62	1.1225	0.5525	-1.02267	3.8e-05	0.000377015	EPB41L1
ncbi_101117563	0.04	0.05	0.03	0.05	0.1	0.13	0.12	0.1	0.0425	0.1125	1.40439	3.9e-05	0.000386604	Tenm1
ncbi_101109982	1.31	2.01	1.65	1.45	0.43	0.59	0.9	0.85	1.605	0.6925	-1.21269	4.01e-05	0.000395826	MYO19
ncbi_101117453	0.27	0.32	0.45	0.19	0.5	0.81	0.73	0.69	0.3075	0.6825	1.15024	4.05e-05	0.000399796	CCR5
ncbi_101113705	0.08	0.27	0.37	0.27	0.65	1.67	0.87	1.06	0.2475	1.0625	2.10196	4.17e-05	0.00040888	UBD
ncbi_114117957	0.95	1.14	0.75	1.29	0.37	0.47	0.52	0.46	1.0325	0.455	-1.1822	4.21e-05	0.000412471	ZNF836
ncbi_442997	0.75	0.65	1.27	0.72	1.93	1.47	2.06	2.11	0.8475	1.8925	1.15901	4.29e-05	0.000418834	CXCL10
ncbi_101108445	10.28	12.72	9.11	15.32	3.78	7.03	7.43	4.18	11.8575	5.605	-1.08101	4.41e-05	0.000429349	CCT6A
ncbi_101103279	0.17	0.09	0.02	0.01	0.51	0.28	0.22	0.56	0.0725	0.3925	2.43664	4.41e-05	0.000429671	GLMP
ncbi_114113264	103.21	140.54	124.27	127.64	43.89	75.82	44.59	81.37	123.915	61.4175	-1.01263	4.57e-05	0.000443998	HSPB7
ncbi_101120411	0.48	0.54	0.84	0.31	0.16	0.05	0.1	0.1	0.5425	0.1025	-2.404	4.58e-05	0.000445222	CPZ
ncbi_101119084	2.45	0.94	1.4	1.05	0.59	0.5	0.26	0.45	1.46	0.45	-1.69797	4.76e-05	0.0004609	HPDL
ncbi_101107260	0.93	1.05	0.65	1.39	1.3	3.28	2.65	2.31	1.005	2.385	1.24679	5.03e-05	0.000483258	PRODH
ncbi_101123290	0.65	0.8	0.33	0.48	1.01	3.17	0.7	3.25	0.565	2.0325	1.84693	5.05e-05	0.000484407	GIMAP7
ncbi_101105853	2.13	1.86	3.1	2.69	1.19	1.58	0.83	1.21	2.445	1.2025	-1.0238	5.66e-05	0.000537432	NAA15
ncbi_106991220	3.86	5.95	4.77	5.63	3.28	1.79	2.24	2.52	5.0525	2.4575	-1.03981	6.14e-05	0.000579513	DOK7
ncbi_101104587	3.1	4.07	3.91	3.26	1.63	1.63	2.47	0.86	3.585	1.6475	-1.12169	6.23e-05	0.00058629	RHBDF2
ncbi_101114540	0.77	0.97	0.8	1.29	0.31	0.46	0.19	0.41	0.9575	0.3425	-1.48317	6.37e-05	0.000598747	TMC8
ncbi_101104763	0.08	0.11	0.16	0.22	0.36	0.29	0.55	0.31	0.1425	0.3775	1.40551	6.44e-05	0.000603108	SLITRK5
ncbi_101106613	0.23	0.17	0.51	0.38	0.83	0.95	0.86	0.78	0.3225	0.855	1.40663	6.48e-05	0.000606314	WISP2
ncbi_554257	0.58	0.25	0.41	0.5	0.86	0.69	1.19	0.94	0.435	0.92	1.08062	6.55e-05	0.00061218	TLR6
ncbi_101103510	0.28	0.23	0.37	0.23	0.75	0.39	0.77	0.54	0.2775	0.6125	1.14222	6.69e-05	0.000622885	FANCI
ncbi_101111151	2.3	2.92	1.06	2.58	0.6	1.16	1.1	0.63	2.215	0.8725	-1.34408	6.69e-05	0.000622885	PTGFRN
ncbi_101121828	0.54	0.78	0.51	0.72	0.2	0.1	0.3	0.22	0.6375	0.205	-1.6368	6.76e-05	0.000628846	ZNF385B
ncbi_101106926	2.76	4.32	2.84	5.48	2.14	1.44	1.63	1.71	3.85	1.73	-1.15409	6.91e-05	0.000639959	PKN3
ncbi_101109245	0.9	0.4	0.5	0.22	0.48	2.56	2.7	1.21	0.505	1.7375	1.78266	6.92e-05	0.00064045	HDAC6
ncbi_101110289	9.69	18.98	8.68	22.09	6.1	7.06	6.77	6.25	14.86	6.545	-1.18297	7.28e-05	0.000669645	TIPARP
ncbi_100135448	0.22	0.34	0.39	0.27	0.11	0.08	0.06	0.06	0.305	0.0775	-1.97654	7.37e-05	0.0006769	ARNT2
ncbi_101116070	0.13	0.12	0.13	0.09	0.37	0.36	0.31	0.45	0.1175	0.3725	1.66458	7.4e-05	0.000678658	VMO1
ncbi_101102245	0.89	1.58	0.77	1.59	0.41	0.53	0.6	0.44	1.2075	0.495	-1.28652	7.87e-05	0.000717717	MTHFD1L
ncbi_101110523	0.44	0.6	0.31	0.24	1.02	0.82	1.74	0.92	0.3975	1.125	1.5009	7.91e-05	0.000718586	CFAP52
ncbi_105612387	0.09	0.43	0.15	0.52	0	0.02	0.02	0.06	0.2975	0.025	-3.57289	7.94e-05	0.000720455	ZNF750
ncbi_101109081	1.65	0.92	1.1	1.24	0.5	0.53	0.59	0.36	1.2275	0.495	-1.31022	7.98e-05	0.000723169	2022-09-05
ncbi_101121735	1.22	1.62	1.87	1.98	0.73	0.16	0.4	0.58	1.6725	0.4675	-1.83897	8.21e-05	0.000740355	TM4SF18
ncbi_101113589	5.04	7.39	3.02	8.64	2.96	2.33	3.14	2.17	6.0225	2.65	-1.18437	8.72e-05	0.00078212	DPP9
ncbi_101108962	2.37	2.61	3.33	2.12	7.99	8.17	1.76	13.92	2.6075	7.96	1.6101	8.89e-05	0.000795723	HLA-DQA2
ncbi_101122202	5.48	7.04	6.78	6.3	4.34	1.41	2.79	3.06	6.4	2.9	-1.14202	9.04e-05	0.000806011	C1QTNF1
ncbi_114116604	0.4	0.87	0.78	0.86	0.11	0	0.09	0	0.7275	0.05	-3.86295	9.04e-05	0.000806054	ARL11
ncbi_101111820	0.41	0.41	0.4	0.19	0.63	1.12	0.49	0.97	0.3525	0.8025	1.18688	9.2e-05	0.000818624	Wnk4
ncbi_101106927	0	0	0	0	0	0.11	0.33	0.17	0.001	0.1525	7.25267	9.21e-05	0.00081896	CCDC142
ncbi_443019	3.27	4.09	4.88	4.31	1.54	1.74	2.61	2.15	4.1375	2.01	-1.04156	9.25e-05	0.000821919	QPCT
MSTRG.16899	1.85	2.53	1.45	3.44	3.19	17.61	14.31	5.87	2.3175	10.245	2.14428	9.47e-05	0.000839505	Ppp2r2d
ncbi_101118080	3.87	2.26	2.61	2.86	1.34	1.63	1.08	1.6	2.9	1.4125	-1.0378	9.59e-05	0.000848572	NABP1
ncbi_101123385	244.16	194.3	242.16	274.01	86.01	128.35	68.17	170.64	238.657	113.293	-1.07489	9.64e-05	0.000852454	ABRA
ncbi_101122452	12.74	19.45	13.19	17.81	7.55	9.54	4.56	9.01	15.7975	7.665	-1.04334	9.73e-05	0.000858779	SLC16A5
ncbi_101106036	18.99	43.04	20.91	38.77	13.1	14.13	14.4	16.12	30.4275	14.4375	-1.07555	9.78e-05	0.000862233	TMEM233
ncbi_105605834	2.72	1.22	1.65	1.03	0	0.09	0.22	0	1.655	0.0775	-4.41649	9.81e-05	0.000863734	SLC7A3
ncbi_101118389	1.64	0.53	1.06	1.19	0.36	0.43	0.54	0.35	1.105	0.42	-1.39559	9.85e-05	0.000866737	DEGS2
ncbi_114113843	0.09	0.2	0.21	0.15	0.02	0.02	0	0.02	0.1625	0.015	-3.43741	0.0001	0.000877105	Sapcd2
ncbi_101111619	1.23	0.66	0.71	1.04	0.48	0.27	0.38	0.39	0.91	0.38	-1.25987	0.000100617	0.000880784	SLC38A4
ncbi_101119307	0.22	0.22	0.11	0.18	0.56	0.5	0.59	0.44	0.1825	0.5225	1.51753	0.00010511	0.000914246	CFI
ncbi_114116052	13.43	6.88	5.06	12.68	3.5	0.88	0.97	2.36	9.5125	1.9275	-2.30309	0.000107357	0.000931092	SENP6
ncbi_105610494	1.32	0.85	1.33	0.97	0.16	0.5	0.36	0.15	1.1175	0.2925	-1.93377	0.000107726	0.000932668	MISP3
ncbi_101114276	1.28	1.56	1.01	1.69	0.12	0.08	0.5	0.4	1.385	0.275	-2.33238	0.000108908	0.000941274	Nmes1
ncbi_105607877	1.25	0.62	1.17	0.56	0.31	0.33	0.36	0.28	0.9	0.32	-1.49185	0.000110183	0.00095175	SSUH2
ncbi_101122097	3.62	3.26	4.8	4.11	2.11	2.04	0.52	1.58	3.9475	1.5625	-1.33708	0.000112051	0.000966219	DAB2IP
ncbi_101115890	0.31	0.25	0.34	0.23	0.51	0.8	0.46	0.68	0.2825	0.6125	1.11646	0.000112184	0.000966295	Camta1
ncbi_101113319	0.2	1.46	0.83	0.73	0.05	0.19	0.11	0.15	0.805	0.125	-2.68706	0.00011987	0.00102539	Krt80
ncbi_780465	1.56	4.49	1.85	4.45	1.14	1.29	1.34	0.9	3.0875	1.1675	-1.40302	0.000122722	0.00104799	NOD2
ncbi_100037690	0.54	0.95	1.18	0.34	0.05	0.3	0.03	0.19	0.7525	0.1425	-2.40073	0.000124775	0.0010637	PCK1
MSTRG.19128	0.87	0.64	1.53	0.55	2.17	1.75	1.69	2.28	0.8975	1.9725	1.13604	0.000126963	0.00108113	Foxk1
ncbi_554261	0.24	0.26	0.24	0.11	0.44	0.57	0.76	0.59	0.2125	0.59	1.47325	0.000127556	0.00108533	TLR1
ncbi_101107952	0.26	0.13	0.19	0.11	0.25	0.52	0.55	0.37	0.1725	0.4225	1.29235	0.000127674	0.00108533	SHISAL1
ncbi_114108681	1.76	3.37	2.22	2.62	0.77	0.85	1.45	1.06	2.4925	1.0325	-1.27145	0.000131785	0.00111334	Rdh13
ncbi_106991400	1.09	1.66	1.08	1.73	0.64	0.65	0.44	0.71	1.39	0.61	-1.1882	0.000133726	0.00112608	C17orf113
ncbi_101117297	1.66	1.58	1.35	1.16	1.89	4.09	4.28	3.08	1.4375	3.335	1.21412	0.000134086	0.00112834	CCL26
ncbi_100135440	141.14	247.27	277.32	150.86	122.19	61	122.16	52.88	204.148	89.5575	-1.18873	0.000134544	0.00113155	RPL6
ncbi_101104941	0.29	0.22	0.31	0.22	0.55	0.45	0.83	0.39	0.26	0.555	1.09398	0.000139832	0.00116948	RIMKLA
ncbi_101119500	2.78	2.58	3.71	3.08	2.2	1.06	1.05	1.47	3.0375	1.445	-1.07181	0.000143545	0.0011952	SSC5D
ncbi_100885762	30.41	44.96	32.5	33.96	9.45	23.88	16.38	19.22	35.4575	17.2325	-1.04096	0.000146245	0.00121498	GADD45G
ncbi_101118736	15.71	18.24	10.98	16.63	9.65	4.47	9.31	3.88	15.39	6.8275	-1.17256	0.000151504	0.00125243	Higd1a
ncbi_101116241	0.69	0.26	0.45	0.47	1.02	1.53	1.39	0.46	0.4675	1.1	1.23447	0.000152104	0.00125462	GJC1
ncbi_101116181	0.49	0.33	0.38	0.53	0.07	0.07	0.08	0.1	0.4325	0.08	-2.43463	0.000155183	0.00127652	Tmie
ncbi_105602113	1.1	1.22	1.33	1.04	0.54	0.22	0.48	0.65	1.1725	0.4725	-1.3112	0.000155882	0.00128016	TIGD1
ncbi_100192429	5.57	5.82	6.4	7.71	3.8	2	3.26	3.51	6.375	3.1425	-1.02051	0.000157758	0.00129415	HLF
ncbi_101115503	0.43	0.29	0.79	0.6	0.08	0.16	0.19	0.18	0.5275	0.1525	-1.79036	0.000159238	0.00130202	Mlxipl
ncbi_101116742	0.64	0.65	0.71	0.57	0.11	0.29	0.29	0.31	0.6425	0.25	-1.36177	0.000159523	0.00130364	TLCD2
ncbi_101114142	0.59	0.75	1.08	0.65	0.36	0.28	0.45	0.32	0.7675	0.3525	-1.12254	0.000160151	0.00130806	ADAMTS7
ncbi_101103357	0.16	0.11	0.16	0.07	0.37	0.23	0.73	0.49	0.125	0.455	1.86394	0.000166447	0.0013492	IFI44L
ncbi_101120639	0.45	0.35	0.51	0.32	1.84	0.57	0.62	1.27	0.4075	1.075	1.39946	0.000167995	0.00135955	SLC46A2
ncbi_101118079	0	0	0	0	0.1	0.02	0.14	0	0.001	0.065	6.02237	0.00016838	0.00136193	MYO3B
ncbi_101118216	6.94	1.91	7.74	2.37	16.07	12.41	15.24	14.18	4.74	14.475	1.6106	0.000168527	0.00136238	ART5
ncbi_101115596	0	0	0	0	0.01	0.09	0.16	0.05	0.001	0.0775	6.27612	0.000169428	0.00136893	OTOA
ncbi_101122242	0.4	0.51	0.77	0.68	0.78	2.2	1.59	1.46	0.59	1.5075	1.35337	0.000171173	0.0013808	SETMAR
ncbi_114117592	0.27	0.9	0.66	0.75	0.08	0.08	0	0.17	0.645	0.0825	-2.96683	0.000174006	0.00140139	PCED1A
ncbi_101106877	3.54	1.36	1.85	2.47	0.83	0.57	0.28	1.2	2.305	0.72	-1.6787	0.000174814	0.00140714	CHRDL2
ncbi_101107225	4.11	3.48	3.95	4.33	1.33	2.9	1.57	1.95	3.9675	1.9375	-1.03403	0.000175729	0.00141223	GAS2L1
ncbi_100642178	0.75	0.45	0.6	0.21	1.22	0.98	1.61	1.2	0.5025	1.2525	1.31762	0.000177103	0.00142099	--
ncbi_101123017	0.37	0.49	0.45	0.45	0.16	0.27	0.18	0.24	0.44	0.2125	-1.05004	0.000180192	0.00144423	GPRASP1
ncbi_105602066	5.63	1.27	1.08	4.58	0.46	0.95	0.48	0.94	3.14	0.7075	-2.14996	0.000186286	0.00148672	CD63
ncbi_101120832	3.75	0.9	3.25	1.92	5.03	3.82	6.06	5.77	2.455	5.17	1.07444	0.000187542	0.00149595	ETNPPL
ncbi_101103410	0.21	0.76	1.02	1.19	0	0.11	0	0	0.795	0.0275	-4.85345	0.000191611	0.00151872	Hes5
ncbi_101117480	17.46	30.31	22.79	28.82	10.9	11.83	8.39	17.84	24.845	12.24	-1.02135	0.000192242	0.00152292	MYORG
ncbi_101105713	0.63	0.65	0.82	0.94	0.34	0.37	0.52	0.24	0.76	0.3675	-1.04826	0.000196377	0.00155158	PLK1
ncbi_101114379	8.84	10.35	0	21.51	0.08	0	0	0	10.175	0.02	-8.99081	0.000201899	0.00159018	NDUFA5
ncbi_101120588	0.84	0.83	1.17	0.77	0.34	0.51	0.33	0.53	0.9025	0.4275	-1.078	0.000207428	0.00162945	NLGN2
ncbi_101120619	0.57	1.5	1.19	1.1	0.2	0.35	0.25	0.5	1.09	0.325	-1.74582	0.000212362	0.00165952	TH
ncbi_101105018	3.33	3.43	3.54	4.03	0.78	2.2	1.38	2.01	3.5825	1.5925	-1.16967	0.000214551	0.00167401	ZNF805
ncbi_101117749	0.33	0.36	0.62	0.27	0.81	0.95	1	0.62	0.395	0.845	1.0971	0.000219909	0.00171048	TPCN2
ncbi_101119517	1.22	1.14	1.57	1.05	1.65	6.87	2.27	6.59	1.245	4.345	1.80321	0.0002233	0.00173147	GBP1
ncbi_101110467	1.83	1.39	1.77	1.31	0.92	0.53	0.42	0.61	1.575	0.62	-1.34501	0.000224237	0.00173783	TMEM45A
ncbi_101119187	74.78	107.63	82.57	130.19	28.53	63.84	48.97	55.75	98.7925	49.2725	-1.00362	0.000224648	0.00174012	TINAGL1
ncbi_101112877	1.3	1.29	1.5	1.58	0.55	0.9	0.38	0.7	1.4175	0.6325	-1.16421	0.000225496	0.00174489	CHST3
ncbi_101103435	1.21	1.37	1.68	1.88	0.37	0.93	0.39	0.69	1.535	0.595	-1.36728	0.000229711	0.00177385	SLC25A22
ncbi_101107288	0.07	0.06	0.1	0.09	0.19	0.17	0.2	0.18	0.08	0.185	1.20945	0.000232542	0.00179386	EPHA7
ncbi_101109715	0.86	0.32	0.58	0.5	1.46	0.83	1.28	1.04	0.565	1.1525	1.02844	0.000242716	0.00185707	N4BP2L1
ncbi_101116349	0.32	0.33	0.36	0.34	0.74	0.91	0.79	0.66	0.3375	0.775	1.19931	0.000247155	0.00188514	FBXO4
ncbi_114108759	0	0	0	0.06	0.69	0.2	0.37	0.15	0.015	0.3525	4.55459	0.000250243	0.00190688	IFI6
ncbi_101119869	1.66	2.85	1.26	2.26	0.8	0.87	0.77	0.6	2.0075	0.76	-1.40133	0.00025646	0.00194832	RPL7L1
ncbi_101115857	0.29	0.19	0.17	0.13	0.38	0.37	0.42	0.4	0.195	0.3925	1.00922	0.000263184	0.00199234	Zdhhc15
ncbi_101102764	1.29	1.66	2.84	2.84	0.68	0.54	0.82	1.13	2.1575	0.7925	-1.44488	0.000266646	0.00201549	GMPPB
ncbi_114116100	0.51	0.68	1.01	0.38	1.76	1.03	2.18	1.14	0.645	1.5275	1.2438	0.000269882	0.00203585	VNN1
ncbi_101104226	0.29	0.22	0.35	0.25	0.38	0.81	0.51	0.67	0.2775	0.5925	1.09433	0.000272423	0.00205295	C3AR1
ncbi_101111166	0.16	0.03	0.15	0.18	0.26	0.4	0.5	0.46	0.13	0.405	1.63941	0.000272772	0.00205443	CBR4
ncbi_780517	0.05	0	0.07	0	0.16	0.2	0.24	0.4	0.03	0.25	3.05889	0.000278018	0.00208674	TNFSF13B
ncbi_101117550	0.36	0.2	0.52	0.18	0.75	0.45	0.67	0.93	0.315	0.7	1.152	0.00028393	0.00212368	CGN
ncbi_100913153	1.55	0.99	0.72	1.12	0.49	0.33	0.57	0.47	1.095	0.465	-1.23563	0.000286017	0.00213701	ARHGAP36
ncbi_101108052	0.2	0.28	0.49	0.27	0.03	0.12	0	0.03	0.31	0.045	-2.78427	0.00028614	0.00213701	HDC
ncbi_443218	90.31	34.48	86.18	43.73	324.68	91.73	131.16	271.57	63.675	204.785	1.68531	0.000289634	0.00215988	FOS
ncbi_101114311	0.2	0.17	0.19	0.25	0.44	1.09	0.69	0.54	0.2025	0.69	1.76867	0.000304647	0.0022606	CCDC197
ncbi_114116377	4.76	7.65	4.85	8.82	2.71	4.04	2.95	2.72	6.52	3.105	-1.07028	0.000311352	0.0023063	NOV
ncbi_101118014	0.23	0.15	0.17	0.08	0.28	0.47	0.43	0.43	0.1575	0.4025	1.35364	0.000312333	0.00231001	CCDC146
MSTRG.4689	4.01	4.48	4.08	3.3	2.25	1.35	1.45	2.17	3.9675	1.805	-1.13623	0.000312385	0.00231001	MGST1
ncbi_101107342	0.99	1.03	2.39	1.17	0.16	0.72	0.31	0.62	1.395	0.4525	-1.62428	0.000320564	0.00236235	CILP2
ncbi_101110596	1.59	0.41	1.4	0.57	0.11	0.32	0.13	0.2	0.9925	0.19	-2.38507	0.000321255	0.00236628	GPX2
ncbi_101104854	2.93	3.14	2.95	4.26	1.18	1.74	2.24	0.84	3.32	1.5	-1.14622	0.000324591	0.00238733	CCDC84
ncbi_101123419	0.03	0.04	0.05	0.04	0.09	0.26	0.21	0.09	0.04	0.1625	2.02237	0.000329512	0.00241878	C4A
ncbi_443163	2.73	4.95	2.3	6.36	1.04	1.36	2.11	1.81	4.085	1.58	-1.37041	0.000341023	0.00249497	RGS2
ncbi_101106498	0	0.01	0.03	0	0.18	0.06	0.12	0.18	0.01	0.135	3.75489	0.00034938	0.00254718	ULBP1
ncbi_101113100	3.78	1.99	3.04	2.78	2	0.97	1.13	1.49	2.8975	1.3975	-1.05196	0.000349556	0.00254723	C1QTNF3
ncbi_105612104	1.3	1.18	1.16	1.37	0.61	0.62	0.52	0.73	1.2525	0.62	-1.01447	0.000350521	0.00255302	TPBG
ncbi_101120673	0.02	0.05	0.03	0.04	0	0	0.01	0	0.035	0.0025	-3.80735	0.000352611	0.00256103	KCNQ3
ncbi_101109187	1.45	1.46	1.22	1.75	0.57	0.26	0.45	0.73	1.47	0.5025	-1.54862	0.000356958	0.00258985	PI15
ncbi_101112949	1.22	0.49	0.66	1.1	0.85	2.72	2.33	1.83	0.8675	1.9325	1.15553	0.000359969	0.00260739	STC1
ncbi_101113475	0.25	0.07	0.14	0.12	0.63	0.4	0.43	0.44	0.145	0.475	1.71187	0.000360071	0.00260739	AK8
ncbi_101105660	0.03	0.06	0	0.01	0.22	0.17	0.19	0.13	0.025	0.1775	2.82782	0.000364017	0.0026247	Kcnn2
ncbi_101118946	0.27	0.53	0.45	0.49	0.15	0.15	0.19	0.14	0.435	0.1575	-1.46566	0.000364036	0.0026247	UNC5A
ncbi_443534	0.14	0.19	0.58	0.23	0.06	0.04	0.07	0.01	0.285	0.045	-2.66297	0.000373379	0.00268047	LEP
ncbi_101104734	0.1	0.05	0.05	0.04	0.12	0.36	0.13	0.27	0.06	0.22	1.87447	0.000377732	0.00270525	PTPRO
ncbi_101103925	0.45	0.19	0.24	0.26	0.41	0.81	0.63	0.55	0.285	0.6	1.074	0.000379433	0.00271613	SFI1
ncbi_101110855	4.87	17.86	10.18	18.15	5.87	3.89	5.31	5.53	12.765	5.15	-1.30955	0.000382144	0.00273293	SECTM1
ncbi_101116261	0.22	0.27	0.2	0.36	0.44	0.82	0.55	0.42	0.2625	0.5575	1.08665	0.000399954	0.00283731	XYLB
ncbi_105604615	2.03	2.42	2.15	2.36	0.77	0.53	0.9	1.36	2.24	0.89	-1.33162	0.000401936	0.00285002	PRSS33
ncbi_101122738	14.36	13.67	13.21	16.96	3.24	8.27	8.14	8.94	14.55	7.1475	-1.02551	0.000409544	0.00289849	NEXN
ncbi_101120021	10.95	3.87	6.37	10.35	3.32	4.59	4.01	3.09	7.885	3.7525	-1.07126	0.000421468	0.00297307	Sema7a
ncbi_101102869	0.22	0.17	0.3	0.27	0.7	0.33	0.56	0.5	0.24	0.5225	1.1224	0.00042392	0.00298755	Pgbd5
ncbi_101117681	2.47	3.89	3.67	3.58	2.26	0.9	1.42	1.75	3.4025	1.5825	-1.10439	0.000425421	0.00299532	SCRN2
ncbi_101115081	0.58	0.51	0.51	0.51	0.24	0.2	0	0.15	0.5275	0.1475	-1.83846	0.000427653	0.0030068	Rcor2
ncbi_101110694	0.49	0.63	0.63	0.77	0.14	0.35	0.25	0.14	0.63	0.22	-1.51785	0.000441434	0.00309065	SLC17A9
ncbi_101102288	0.29	0.16	0.21	0.23	0.25	0.71	0.71	0.47	0.2225	0.535	1.26573	0.000447732	0.00312891	CCNB3
ncbi_101119261	0.22	0.22	0.27	0.2	0.09	0.13	0.07	0.1	0.2275	0.0975	-1.22239	0.000448505	0.00313285	COL7A1
ncbi_780468	0.44	0.98	0.86	1.34	0.25	0.27	0.14	0.31	0.905	0.2425	-1.89993	0.000464837	0.00323488	ARG2
ncbi_101108171	40.85	8.61	7.07	37.62	74.32	141.24	88.64	120.65	23.5375	106.213	2.17392	0.00047425	0.00329275	HLA-A
ncbi_101105351	1.34	0.69	2.06	1.71	0.59	0.31	0.43	0.28	1.45	0.4025	-1.84899	0.000480778	0.00332884	DKKL1
ncbi_101113579	0.51	0.37	0.54	0.39	0.22	0.16	0.16	0.05	0.4525	0.1475	-1.6172	0.000482793	0.00333992	CALCR
ncbi_101103068	1.97	1.08	2.05	1.65	0.55	0.95	0.75	0.99	1.6875	0.81	-1.05889	0.000497601	0.00342634	SMAD6
ncbi_101118982	0.79	0.84	0.61	1.04	0.45	0.47	0.28	0.38	0.82	0.395	-1.05377	0.000501712	0.00345149	SPON1
ncbi_114108675	114.92	56.06	66.99	101.96	133.05	467.22	109.32	482.79	84.9825	298.095	1.81053	0.000502542	0.00345403	HLA-A
ncbi_101104301	0.54	0.22	0.36	0.3	0.87	0.74	0.83	0.66	0.355	0.775	1.12638	0.000520644	0.00355241	TMEM35A
ncbi_101114574	0.82	0.96	0.58	0.53	1.32	1.99	1.74	1.13	0.7225	1.545	1.09654	0.000521487	0.00355493	SFR1
ncbi_101105154	1.22	1.43	2.04	1.28	1.07	0.39	0.38	0.66	1.4925	0.625	-1.2558	0.000530157	0.00360094	KCP
ncbi_114110420	0.51	0.39	0.51	0.8	0.24	0.18	0.26	0.19	0.5525	0.2175	-1.34496	0.000534438	0.00362019	PRDM15
ncbi_101106005	1.81	2.51	3.75	2.74	1.43	1.69	1.08	1.13	2.7025	1.3325	-1.02016	0.000536831	0.00363148	HOOK2
ncbi_101108321	0.15	0.04	0.14	0.1	0.16	0.42	0.25	0.35	0.1075	0.295	1.45638	0.000553104	0.00371643	ABCC4
MSTRG.18905	0	0.61	1.77	0.54	0	0	0	0	0.73	0.001	-9.51175	0.000560006	0.00375775	YBX1
ncbi_101102489	0.7	0.42	0.46	0.45	0.82	1.74	1.18	0.88	0.5075	1.155	1.18641	0.000577146	0.00385552	CDO1
ncbi_101120367	0.52	0.32	0.39	0.45	0.71	1.32	0.74	0.95	0.42	0.93	1.14684	0.000578042	0.00385807	GBP5
ncbi_101103714	0.49	0.28	0.33	0.25	0.92	0.49	0.6	1.76	0.3375	0.9425	1.48161	0.00058232	0.003878	Clec2h
ncbi_101122119	0.15	0.08	0.09	0.19	0.02	0	0.02	0.01	0.1275	0.0125	-3.3505	0.000588739	0.00391727	PCDH8
ncbi_101121984	0.05	0.05	0.01	0.03	0.07	0.24	0.15	0.27	0.035	0.1825	2.38247	0.000590836	0.00392948	Ak5
ncbi_105612764	0.22	0.21	0.34	0.96	0.04	0	0	0	0.4325	0.01	-5.43463	0.000611157	0.00404516	C4orf54
ncbi_101120029	0.54	0.71	1.5	0.5	0.88	3.66	1.8	2.99	0.8125	2.3325	1.52144	0.00061278	0.00405207	PLA2G16
ncbi_101102423	0.04	0.07	0.05	0.14	0.15	0.39	0.1	0.3	0.075	0.235	1.6477	0.000645309	0.00424286	PLCXD3
ncbi_101118613	0.37	0.3	0.51	0.29	0.16	0.07	0.17	0.18	0.3675	0.145	-1.34169	0.000673039	0.00440166	SORCS2
ncbi_101118234	0.33	0.32	0.37	0.25	0.12	0.11	0.1	0.08	0.3175	0.1025	-1.63113	0.000688914	0.00448826	SYT12
ncbi_114118453	2.32	3.98	2.06	5.78	8.01	40.3	12.33	6.66	3.535	16.825	2.25082	0.000699924	0.00454919	RPL34
ncbi_101113905	0.01	0	0.01	0	0.15	0.14	0.13	0.07	0.005	0.1225	4.61471	0.000702458	0.00456263	LRRC31
ncbi_443287	0.12	0.12	0.08	0.05	0	0	0	0	0.0925	0.001	-6.53138	0.000704504	0.00457196	BEGAIN
ncbi_100127218	0.13	0	0.11	0	1.49	0.09	0.63	0.63	0.06	0.71	3.56478	0.00072152	0.00466826	AHSP
ncbi_101120836	1.38	0.93	1.84	1.33	0.81	0.5	0.47	0.72	1.37	0.625	-1.13225	0.00073226	0.00472552	EFS
ncbi_114118405	0.29	0.68	0.28	1.2	0.11	0.29	0.19	0.2	0.6125	0.1975	-1.63286	0.000737635	0.00474766	MICALCL
ncbi_101109197	1.11	2.27	1.63	1.76	0.67	0.79	0.77	0.67	1.6925	0.725	-1.2231	0.000747705	0.00479836	NT5C3B
ncbi_101121040	0.22	0.08	0.2	0.23	0.3	0.93	0.42	0.52	0.1825	0.5425	1.57173	0.000751057	0.00481078	EMB
ncbi_101106599	1.04	1.62	1.54	2.37	0.61	0.33	0	0.68	1.6425	0.405	-2.0199	0.000763396	0.00487035	RIDA
ncbi_101104187	0.6	0.32	0.18	0.58	0.17	0.07	0.11	0.1	0.42	0.1125	-1.90046	0.000764975	0.00487582	MDGA1
ncbi_101109941	0.05	0.08	0.1	0.12	0.26	0.16	0.27	0.14	0.0875	0.2075	1.24576	0.000768867	0.0048951	LY75
ncbi_101118877	2.32	2.94	3.33	4.06	0.88	2.08	1.36	1.68	3.1625	1.5	-1.0761	0.000772314	0.00490801	RIPK3
ncbi_101119618	0.51	0.41	0.66	0.79	0.76	1.92	0.99	1.2	0.5925	1.2175	1.03903	0.000805903	0.00510091	TCEAL1
ncbi_105603383	0.47	0.59	0.51	0.43	0.89	0.9	1.98	0.75	0.5	1.13	1.17632	0.000813717	0.00514063	ZNF621
ncbi_101103462	0	0.2	0	0.13	0.19	0.83	1.85	0.23	0.0825	0.775	3.23173	0.000822385	0.00519321	MGST1
ncbi_101107429	0.78	0.57	0.56	1.49	1.05	2.56	1.78	1.61	0.85	1.75	1.04182	0.000836023	0.00526603	WBP11
ncbi_114113232	0	0.2	0	0.21	0.95	4.04	1.32	2.42	0.1025	2.1825	4.41229	0.000919422	0.00571695	Rap1b
ncbi_101108212	0.1	0.06	0.06	0.13	0.12	0.36	0.21	0.33	0.0875	0.255	1.54314	0.000931156	0.00577555	GUCY2C
ncbi_101105848	3.11	4.91	6.08	5.51	1.07	2.87	2.88	2.54	4.9025	2.34	-1.06701	0.000934038	0.00579103	HYOU1
ncbi_101118828	0.13	1.56	0.65	1.21	2.17	5.86	1.64	3.31	0.8875	3.245	1.8704	0.000955251	0.00590305	Magoh
ncbi_105610011	0.1	0.14	0.11	0.17	0.04	0.07	0.02	0.07	0.13	0.05	-1.37851	0.000966073	0.00596255	USH2A
ncbi_101112835	0.2	0.21	0.21	0.1	0.42	0.41	0.34	0.41	0.18	0.395	1.13386	0.00098653	0.00607226	LIN9
ncbi_114118046	0.97	0.63	1.15	1.22	0.49	0.37	0.44	0.33	0.9925	0.4075	-1.28427	0.00100758	0.00617806	--
ncbi_101108913	0.8	1.72	1.83	1.6	0.4	0.73	0.44	0.73	1.4875	0.575	-1.37126	0.00101881	0.00623418	CRLF1
ncbi_101118670	0.23	0.05	0.24	0.19	0.18	2.41	0.38	1.64	0.1775	1.1525	2.69888	0.0010332	0.00630678	EDA2R
ncbi_101123588	2.66	1.56	2.53	2.05	0.97	0.91	0.82	1.27	2.2	0.9925	-1.14836	0.00106946	0.00650852	Slmap
ncbi_101123293	0.79	0.45	0.86	0.48	0.17	0.3	0.26	0.15	0.645	0.22	-1.5518	0.00107495	0.00653508	ASF1B
ncbi_101115799	0.1	0.08	0.11	0.07	0	0	0	0.01	0.09	0.0025	-5.16993	0.00107714	0.00654463	PRSS35
ncbi_100137067	2.27	6.14	6.41	2.67	4.33	19.73	10.55	10.57	4.3725	11.295	1.36915	0.00109046	0.00661129	FABP4
ncbi_105610446	0.15	0.15	0.39	0.13	0	0.04	0	0	0.205	0.01	-4.35755	0.00109606	0.00663916	--
ncbi_101116417	0.4	0.47	0.46	0.43	0.11	0.17	0.23	0.17	0.44	0.17	-1.37197	0.00110002	0.00666049	SUV39H2
ncbi_101114116	0.03	0.03	0	0.02	0	0.42	0.38	0.43	0.02	0.3075	3.94251	0.00110145	0.00666646	COLEC10
ncbi_101106197	0.14	0.14	0.22	0.26	0.04	0.02	0.05	0	0.19	0.0275	-2.7885	0.00111309	0.00672874	KCNJ14
ncbi_101123345	0.13	0.09	0.13	0.14	0.06	0.01	0.02	0.04	0.1225	0.0325	-1.91427	0.00112072	0.00676671	MED12L
ncbi_101105079	0.11	0.04	0.11	0.06	0.15	0.16	0.2	0.17	0.08	0.17	1.08746	0.00112251	0.00677479	DMXL2
ncbi_101113132	105.32	198.88	93.2	216.98	172.05	641.14	354.04	519.36	153.595	421.647	1.45691	0.00112331	0.00677693	Trim63
ncbi_101113467	0.44	0.49	0.4	0.4	0.96	0.68	1.39	0.56	0.4325	0.8975	1.05321	0.00113219	0.00682225	CYTIP
MSTRG.5042	3.6	4.07	5.14	4.62	0	1.46	2.19	0.53	4.3575	1.045	-2.06	0.00114562	0.0068921	Ralbp1
ncbi_101113880	0.12	0.09	0.05	0.15	0	0.04	0	0	0.1025	0.01	-3.35755	0.00114727	0.00689682	Kcnc1
ncbi_101108985	0.03	0	0.04	0.02	0.17	0.1	0.12	0.43	0.0225	0.205	3.18763	0.00114733	0.00689682	CENPU
ncbi_101106146	2.07	0	0.65	2.01	0	0	0	0	1.1825	0.001	-10.2076	0.00115435	0.00693074	ORC2
ncbi_101111971	0	0	0	0	0.6	0.37	0.94	0	0.001	0.4775	8.89936	0.00116332	0.00697618	DIS3L
ncbi_101106284	1.35	0.35	0.83	0.93	1.96	1.25	2.26	1.58	0.865	1.7625	1.02685	0.00120746	0.00720058	Ppp1cc
ncbi_106991148	0.84	4.68	3.4	2.96	7.7	5.31	6.16	5.92	2.97	6.2725	1.07858	0.00121003	0.0072131	Asb10
ncbi_105611838	0.68	0.18	0.64	0.37	0.87	0.92	1.21	0.81	0.4675	0.9525	1.02675	0.00122308	0.00727927	--
ncbi_101109291	0.58	0.58	0.81	0.56	0.22	0.42	0.24	0.33	0.6325	0.3025	-1.06413	0.00123552	0.00733876	PKP1
ncbi_101113178	0.19	0.11	0.18	0.22	0.04	0	0.06	0.03	0.175	0.0325	-2.42884	0.00125383	0.00743578	CDC25A
ncbi_101118837	0.84	0.22	0.24	0.38	0.92	0.78	0.98	0.81	0.42	0.8725	1.05477	0.00126963	0.00752055	PHLDB2
ncbi_101111328	2.84	1.28	2.53	2.06	1.44	0.54	0.63	0.99	2.1775	0.9	-1.27468	0.00133386	0.00784526	PHGDH
ncbi_101106445	1.23	0.93	1.71	0.83	0.67	0.57	0.52	0.56	1.175	0.58	-1.01854	0.00133726	0.00786214	TTYH2
ncbi_101113349	0.18	0.08	0.33	0.23	0.04	0.03	0.1	0.01	0.205	0.045	-2.18763	0.00136404	0.00799144	ANGPTL7
ncbi_105607326	0.2	0.08	0.22	0.16	0.18	0.55	0.66	0.53	0.165	0.48	1.54057	0.00137138	0.00802504	--
ncbi_101111869	0.16	0.07	0.06	0.1	0	0	0	0.01	0.0975	0.0025	-5.2854	0.00137201	0.00802558	DPYSL5
ncbi_101112926	0.99	0.77	1.24	0.92	0.49	0.46	0.63	0.22	0.98	0.45	-1.12286	0.00137898	0.00805771	ADORA2A
ncbi_101120665	0.04	0	0.03	0.03	0.32	0.08	0.35	0.04	0.025	0.1975	2.98185	0.00138645	0.0080909	MAPK10
ncbi_101109229	2.91	0	0.96	0.82	0	0	0	0	1.1725	0.001	-10.1954	0.00138804	0.00809096	WDR3
ncbi_101102455	0.99	0.65	1.02	0.61	0.25	0.44	0.28	0.39	0.8175	0.34	-1.26568	0.0014167	0.00823243	PIGA
ncbi_101118587	0.31	0.47	0.47	0.46	0.24	0.14	0.22	0.16	0.4275	0.19	-1.16993	0.00143592	0.00832614	GK
ncbi_114108639	0.39	0.09	0.16	0.08	0.42	0.5	0.55	0.42	0.18	0.4725	1.39232	0.00147628	0.00852252	RUNDC3B
ncbi_101104028	0.14	0.07	0.15	0.07	0.03	0.01	0.05	0.04	0.1075	0.0325	-1.72583	0.00148062	0.00854434	LSAMP
ncbi_443186	1.48	3.42	3.21	1.08	0.25	0.64	1.03	0.68	2.2975	0.65	-1.82155	0.00154372	0.00887432	ACACA
MSTRG.15496	0.3	0.64	0.39	0.84	0.64	2.85	1.33	2.05	0.5425	1.7175	1.66262	0.00154688	0.00888567	--
ncbi_101102696	0.41	0.55	0.59	0.49	0.11	0.18	0.06	0.14	0.51	0.1225	-2.05772	0.00155704	0.00892452	QPRT
ncbi_114114576	0.35	0.52	0.32	0.14	0.64	0.87	0.75	0.73	0.3325	0.7475	1.16872	0.0015779	0.00903619	TMEM176B
ncbi_101113327	1.45	2.19	2.15	1.85	0.93	1.35	0.78	0.68	1.91	0.935	-1.03053	0.00158347	0.00906465	SIRT6
ncbi_101105585	0.34	0.37	0.33	0.29	0.17	0.15	0.11	0.12	0.3325	0.1375	-1.27392	0.001586	0.00907563	RAPGEFL1
ncbi_101109723	0.33	0.51	0.41	0.81	0.08	0.22	0.05	0.23	0.515	0.145	-1.82852	0.00159283	0.00910084	ZNF385C
ncbi_101113203	0.59	1.13	0.64	0.58	0.92	2	1.23	1.92	0.735	1.5175	1.04588	0.00159398	0.00910393	VSIG4
ncbi_101118514	1.08	4.4	3.5	2.81	12.44	13.62	2.67	18.2	2.9475	11.7325	1.99295	0.00162457	0.00926104	BoLA-DQB
ncbi_101119358	0.47	0.06	0.36	0.34	0.92	1.92	0.3	0.65	0.3075	0.9475	1.62354	0.00163314	0.00930282	INPP5B
ncbi_101121789	2.93	2.56	2.21	4.54	1.68	1.84	1.18	1.34	3.06	1.51	-1.01898	0.00163396	0.00930395	ACOT7
ncbi_101111884	0.15	0.15	0.13	0.16	0.06	0.08	0.06	0.08	0.1475	0.07	-1.07529	0.00164451	0.00934573	ADGRL3
ncbi_105606568	0.01	0	0.01	0.01	0.06	0.05	0.09	0.13	0.0075	0.0825	3.45943	0.00165894	0.00941047	--
MSTRG.9260	0.31	0.67	0.87	0.88	0.08	0.4	0	0.16	0.6825	0.16	-2.09276	0.00171736	0.00967969	Cdk8
ncbi_101111621	0.53	1.29	0.68	0.76	0.21	0.42	0.27	0.39	0.815	0.3225	-1.3375	0.00177034	0.00991869	CSDC2
ncbi_101106374	4.26	45.24	8.77	44.07	3.45	5.32	5.13	4.57	25.585	4.6175	-2.47011	0.00178094	0.00995949	HLA-A
ncbi_101105553	1.31	0.35	0.55	1.17	1.92	2.1	2.63	1.2	0.845	1.9625	1.21567	0.00178231	0.00996341	RIDA
ncbi_101112557	0	0	0	0	0.15	0.23	0	0.07	0.001	0.1125	6.81378	0.00178506	0.00997136	HEPACAM2
ncbi_101122360	0.21	0.1	0.2	0.14	0.23	0.59	0.35	0.34	0.1625	0.3775	1.21604	0.00184174	0.010227	BANK1
ncbi_101118126	0.35	0.38	0.39	0.42	0.46	1.45	0.96	0.53	0.385	0.85	1.1426	0.0018491	0.0102565	Irx3
ncbi_114108746	0.3	0	0.13	0.04	0.65	0.68	0.76	0.18	0.1175	0.5675	2.27196	0.001853	0.0102743	NAP1L1
ncbi_101119037	0.14	0.11	0.1	0.13	0.3	0.28	0.28	0.24	0.12	0.275	1.1964	0.00186821	0.0103396	MAPK8IP2
ncbi_114115623	0	0	0	0	0.41	1.76	0	1.28	0.001	0.8625	9.75238	0.00192593	0.0106316	TOMM20
ncbi_101112783	0.34	0.66	0.68	0.59	0.24	0.12	0.15	0.05	0.5675	0.14	-2.01919	0.00195207	0.0107463	Dok6
ncbi_101108968	0.39	0.27	0.26	0.37	0.43	0.94	0.73	0.61	0.3225	0.6775	1.07092	0.00202951	0.0111175	EFCAB7
ncbi_101110322	0.03	0	0.04	0	0.26	0.19	0.46	0.2	0.0175	0.2775	3.98706	0.00208417	0.0113547	FAM221A
ncbi_101102931	3.72	3.65	4.68	2.84	4	14.48	5.67	11.12	3.7225	8.8175	1.2441	0.00209019	0.011371	C7
ncbi_101117596	0.54	0.23	0.3	0.35	0.95	0.57	1.49	0.71	0.355	0.93	1.38941	0.00210968	0.0114521	EBPL
ncbi_101106730	0.07	0.19	0.07	0.06	0.26	0.51	0.34	0.27	0.0975	0.345	1.82312	0.00213744	0.0115777	FCGR2
ncbi_101115612	0.24	0.13	0.39	0.11	0.29	0.91	0.55	0.75	0.2175	0.625	1.52284	0.0021778	0.0117581	STYK1
ncbi_101110407	0.6	0.51	0.78	0.54	0.37	0.25	0.08	0.28	0.6075	0.245	-1.3101	0.00218449	0.0117773	SARDH
ncbi_101110450	0.16	0.08	0.11	0.12	0.11	0.42	0.26	0.3	0.1175	0.2725	1.2136	0.00223769	0.0120192	NAIP
ncbi_101105219	0.02	0.05	0.15	0.05	0.39	0.17	0.16	0.26	0.0675	0.245	1.85982	0.0023234	0.0124191	TAF7L
ncbi_101108412	0.23	0.21	0.05	0.2	0.04	0.02	0	0	0.1725	0.015	-3.52356	0.00232945	0.0124381	MATN4
ncbi_101104292	0.07	0.32	0.27	0.2	0.07	0.06	0.03	0.06	0.215	0.055	-1.96683	0.00233608	0.0124514	SEC14L5
ncbi_101103169	1.19	1.86	1.34	2.13	0.64	1.14	0.58	0.69	1.63	0.7625	-1.09606	0.00233694	0.0124515	FLVCR1
ncbi_101108455	1.59	0.52	2.25	1.13	0.77	0.32	0.7	0.69	1.3725	0.62	-1.14647	0.00235276	0.0125225	RTL5
ncbi_101104998	1.17	1.61	1.36	1.34	0.98	0.54	0.6	0.37	1.37	0.6225	-1.13803	0.00239194	0.0126904	RASL11B
ncbi_114109035	0	0.31	0.05	0.17	0	0	0	0	0.1325	0.001	-7.04985	0.00239695	0.0127081	gag
ncbi_101116073	221.03	56.32	178.79	85.32	50.24	39.58	30.89	58.11	135.365	44.705	-1.59835	0.00241633	0.0127792	ATF3
ncbi_101116726	0.29	0.78	0.39	0.47	0.17	0.2	0.28	0.09	0.4825	0.185	-1.383	0.00243236	0.0128504	ICAM5
ncbi_101120397	0.1	0.27	0.2	0.08	0.21	0.61	0.37	0.32	0.1625	0.3775	1.21604	0.00244674	0.0129173	GREB1
ncbi_114110793	0.74	1.02	0.75	0.15	0	0	0	0.21	0.665	0.0525	-3.66297	0.00255589	0.0134133	Dock7
MSTRG.5487	0.04	0	0.19	0.13	0.72	0.08	0.92	1.51	0.09	0.8075	3.16547	0.00255825	0.013421	TRGC1
ncbi_101119925	0.62	0.34	0.75	0.43	0.2	0.25	0.16	0.3	0.535	0.2275	-1.23367	0.00257248	0.0134779	VAT1L
ncbi_101107953	0.48	1.13	0.48	1.31	0.18	0.31	0.22	0.3	0.85	0.2525	-1.75118	0.00258722	0.0135398	Upp1
ncbi_101102076	0.26	0.29	0.14	0.15	0.11	0.07	0.08	0.05	0.21	0.0775	-1.43812	0.00267445	0.0139235	SRCIN1
ncbi_101106094	0.35	0.32	0.29	0.33	0.26	0.84	0.69	0.86	0.3225	0.6625	1.03862	0.00268293	0.0139579	NCF2
ncbi_101104387	0.45	0.49	0.34	0.53	0.19	0.05	0.1	0.23	0.4525	0.1425	-1.66696	0.00269192	0.0139853	CHAC2
ncbi_101117966	0.4	0.16	0.24	0.28	0.48	0.85	0.38	0.64	0.27	0.5875	1.12163	0.00270154	0.0140133	MMP17
ncbi_101119519	0	0.02	0.04	0	0.07	0.21	0.21	0.05	0.015	0.135	3.16993	0.00273194	0.0141589	TDRKH
ncbi_101111582	0.26	0.13	0.17	0.16	0.07	0.07	0.09	0.07	0.18	0.075	-1.26303	0.00273505	0.0141701	Scn5a
ncbi_101122879	1.5	3.01	2.54	1.33	1.1	0.23	0.13	1.09	2.095	0.6375	-1.71645	0.00274743	0.0142244	VSTM2L
ncbi_101117717	0.4	0.91	0.51	0.29	0.8	1.94	0.84	1.27	0.5275	1.2125	1.20074	0.0028021	0.0144825	CD96
ncbi_101122983	3.06	2.3	4.54	1.45	4.21	12.91	4.03	13.08	2.8375	8.5575	1.59257	0.00287645	0.0148158	TNFAIP2
ncbi_101120365	0.06	0.12	0.34	0.03	0	0	0	0.02	0.1375	0.005	-4.78136	0.00287813	0.0148193	MFSD2A
ncbi_101102228	0.16	0.19	0.21	0.18	0.08	0	0.02	0.02	0.185	0.03	-2.62449	0.00290968	0.0149561	CRHR2
ncbi_101116790	1.14	1.05	1.24	1.67	0.89	0.41	0.28	0.56	1.275	0.535	-1.25289	0.00291688	0.0149879	FLYWCH2
ncbi_101121177	2.28	0.42	1.48	0.85	2.96	1.94	4.5	1.57	1.2575	2.7425	1.12493	0.00296729	0.0152105	AKAP7
ncbi_101115261	0.05	0.3	0.1	0.2	0.04	0.02	0	0.03	0.1625	0.0225	-2.85244	0.00299418	0.0153222	DDX60
ncbi_101109301	0.02	0.11	0.07	0.06	0	0	0	0	0.065	0.001	-6.02237	0.0030052	0.0153733	AHRR
ncbi_101105034	0.08	0.07	0.04	0.05	0.05	0.27	0.19	0.2	0.06	0.1775	1.56478	0.00308244	0.0157096	CDCP1
ncbi_114108624	0.18	0.12	0.3	0.2	0.27	0.38	0.94	0.45	0.2	0.51	1.3505	0.00311913	0.0158858	PDCD1LG2
ncbi_101120697	0.74	0.95	1.2	0.68	0.6	0.2	0.24	0.34	0.8925	0.345	-1.37126	0.00315125	0.0160252	EMID1
ncbi_101111137	0.54	1.14	0.61	1.14	0.21	0.49	0.38	0.24	0.8575	0.33	-1.37767	0.0031668	0.0160903	Fosl1
ncbi_101111554	132.78	57.85	109.97	59.45	20.82	48.61	19.43	44.24	90.0125	33.275	-1.43569	0.00317164	0.0161095	ACTC1
ncbi_101110089	0.01	0	0.02	0.01	0.05	0.03	0.1	0.04	0.01	0.055	2.45943	0.00318538	0.0161573	RAB3C
MSTRG.9092	0.34	0.34	0.07	0.28	0.82	0.62	1.55	0.46	0.2575	0.8625	1.74395	0.00321276	0.0162833	--
ncbi_101112356	0.01	0.04	0.02	0.09	0.11	0.17	0.19	0.12	0.04	0.1475	1.88264	0.00321661	0.0162937	HIST1H1T
ncbi_101109927	1.07	0.56	1.34	0.85	0.58	0.14	0.52	0.42	0.955	0.415	-1.20239	0.00322241	0.0163121	Dagla
ncbi_101121543	0.2	0.19	0.15	0.17	0.02	0.06	0.05	0.05	0.1775	0.045	-1.97982	0.00329428	0.0166087	BRSK1
ncbi_114109001	0.88	0.36	0.83	1.56	1.62	1.91	2.53	1.4	0.9075	1.865	1.03921	0.00342834	0.017152	NGRN
ncbi_101115304	0.45	0.36	0.67	0.29	0.25	0.23	0.12	0.25	0.4425	0.2125	-1.05821	0.00344893	0.017232	EXOC3L2
ncbi_101109478	48.73	111.67	60.62	99.31	11.5	43.1	27.32	37.56	80.0825	29.87	-1.42279	0.00351223	0.017505	USP2
ncbi_106991336	13.86	7.12	9.75	6.16	5.85	2.65	1.76	5.84	9.2225	4.025	-1.19617	0.00351532	0.0175054	Mafa
ncbi_101123086	1.61	2.01	1.62	1.33	1.25	0.84	0.3	0.72	1.6425	0.7775	-1.07898	0.00352024	0.0175197	SLX4
ncbi_114117594	0.15	0	0.23	0.17	0	0	0	0	0.1375	0.001	-7.10329	0.00352052	0.0175197	Nop56
ncbi_101109693	0.09	0.02	0.07	0	0.07	0.21	0.44	0.27	0.045	0.2475	2.45943	0.00359855	0.017821	AMHR2
ncbi_101108765	0.33	0.35	0.4	0.38	0.19	0.02	0.05	0.14	0.365	0.1	-1.8679	0.003724	0.0183253	TNFSF18
ncbi_100302564	1.06	4.81	1.88	5.08	0.94	1.08	1.36	1.47	3.2075	1.2125	-1.40346	0.00374597	0.0183915	PLAUR
ncbi_114117995	0.03	0.68	0	0.5	0	0	0	0	0.3025	0.001	-8.24079	0.00374891	0.0183999	CEACAM6
ncbi_101116091	0.08	0.05	0.14	0.1	0.2	0.1	0.32	0.18	0.0925	0.2	1.11247	0.00375378	0.0184129	CDH6
ncbi_101103232	48.67	23.87	53.59	15.22	71.87	94.06	53.41	90.01	35.3375	77.3375	1.12997	0.00375518	0.0184129	RPL36
ncbi_101106030	1.15	1.53	1.54	2.03	0.77	0.93	0.51	0.72	1.5625	0.7325	-1.09296	0.00376898	0.0184743	Cdc42ep5
ncbi_101106727	0.39	0.66	0.35	0.32	0.68	0.97	0.62	1.29	0.43	0.89	1.04947	0.00378105	0.0185177	CD2
ncbi_101103501	0.31	0.27	0.3	0.33	0.14	0.17	0.09	0.06	0.3025	0.115	-1.3953	0.00378154	0.0185177	Grik5
ncbi_101111248	0	0	0	0.01	0.03	0.05	0.03	0.02	0.0025	0.0325	3.70044	0.00378576	0.0185262	ADCY10
ncbi_101121603	0.72	0.27	0.5	0.72	1.26	1.09	1.28	0.85	0.5525	1.12	1.01945	0.00380513	0.018615	JCHAIN
ncbi_101118442	0.07	0.24	0.12	0.08	0	0	0.03	0.02	0.1275	0.0125	-3.3505	0.00384075	0.0187632	PLPPR2
ncbi_101106837	1.17	0.62	1.13	0.92	0.47	0.35	0.42	0.67	0.96	0.4775	-1.00753	0.00387426	0.0188793	SDC1
ncbi_114108861	0.74	0.52	0.55	0.71	0.27	0.21	0.42	0.28	0.63	0.295	-1.09464	0.00390687	0.0189951	GNB1L
ncbi_105610737	0.26	0.26	0.15	0.32	0.7	0.47	0.56	0.3	0.2475	0.5075	1.03598	0.00391409	0.0190178	HASPIN
ncbi_101102306	0.14	0.42	0.23	0.39	0.11	0.11	0.06	0.09	0.295	0.0925	-1.67319	0.00394017	0.019126	Lrrc8e
ncbi_101113039	0.93	1.88	4.28	1.69	0.39	1.04	0.95	0.6	2.195	0.745	-1.55891	0.00394214	0.0191293	SNCG
ncbi_443433	1.23	3.99	5.51	2.54	0.95	1.42	2.1	0.68	3.3175	1.2875	-1.36552	0.0039675	0.0192337	MCT7
ncbi_101119518	0.06	0.03	0.06	0.09	0.01	0	0.02	0.02	0.06	0.0125	-2.26303	0.00396967	0.019238	IGSF9B
ncbi_114117808	1.36	0.83	0.18	2.43	2.72	2.61	3.37	3.14	1.2	2.96	1.30256	0.00397819	0.0192731	UAP1
ncbi_101123535	0.47	0.18	0.38	0.13	0.73	0.88	0.7	0.54	0.29	0.7125	1.29684	0.00398269	0.0192773	ACER2
ncbi_101116960	1.28	0.9	1.42	1.31	0.43	0.7	0.33	0.78	1.2275	0.56	-1.13222	0.00400396	0.0193355	REEP4
ncbi_101105481	0.04	0	0.04	0	0.06	0.29	0.11	0.14	0.02	0.15	2.90689	0.00403554	0.0194395	GBP3
ncbi_101109503	0.07	0	0	0.09	0.08	0.23	0.46	0.29	0.04	0.265	2.72792	0.00403858	0.0194411	ARMH1
ncbi_105603925	0.02	0.17	0.09	0.08	0	0.02	0	0	0.09	0.005	-4.16993	0.00404396	0.0194535	C6orf223
ncbi_101101923	0.07	0.09	0.12	0	0.08	0.63	0.38	0.06	0.07	0.2875	2.03814	0.0040898	0.01963	SEC14L4
ncbi_105605457	0	0.5	0.57	0.32	0	0	0	0	0.3475	0.001	-8.44087	0.00415415	0.0198689	CBX1
ncbi_101113861	0.62	2.48	1.87	0.79	0.5	0.76	0.41	0.33	1.44	0.5	-1.52607	0.00420921	0.0200747	MED4
ncbi_100147780	16.39	22.28	12.52	19.98	18.77	54.77	26.51	52.23	17.7925	38.07	1.09739	0.00441817	0.020892	SLC25A33
ncbi_114109518	11.21	4.47	4.63	9.66	152.02	2.52	4.5	128.97	7.4925	72.0025	3.26453	0.00442369	0.0209115	RPL37A
ncbi_101115165	0.09	0.08	0.07	0.13	0.03	0.03	0.01	0.01	0.0925	0.02	-2.20945	0.0044288	0.0209252	CACNA2D2
ncbi_101105348	0.17	0.25	0.24	0.13	0.54	0.46	0.9	0.12	0.1975	0.505	1.35443	0.00449593	0.0211729	SLC44A2
ncbi_101122496	0.03	0	0.02	0	0.09	0.06	0.05	0.06	0.0125	0.065	2.37851	0.00451412	0.0212385	ABCC1
ncbi_101121961	1.38	2.11	3.02	1.83	0.72	1.1	0.81	1.08	2.085	0.9275	-1.16863	0.00454934	0.0213641	TNNI3
ncbi_101107091	0.1	0.1	0.16	0.03	0.31	0.15	0.18	0.23	0.0975	0.2175	1.15754	0.0045572	0.0213943	KLHL3
ncbi_101117406	0.14	0.4	0.77	1.31	1.06	1.83	2.74	1.27	0.655	1.725	1.39703	0.00456619	0.0214231	GABARAPL1
ncbi_101113935	0.04	0.03	0.04	0.04	0.13	0.09	0.07	0.12	0.0375	0.1025	1.45066	0.00470649	0.0219646	UNC5C
ncbi_101117377	0.24	0.31	0.28	0.19	0.08	0.15	0.14	0.1	0.255	0.1175	-1.11784	0.00480179	0.0223329	ITGA10
ncbi_114114475	0.28	0.14	0.5	0.53	0.06	0.06	0.07	0	0.3625	0.0475	-2.93198	0.00487163	0.0225599	ABCB1
ncbi_101109455	0.19	0.21	0.17	0.19	0.09	0.04	0.02	0.05	0.19	0.05	-1.926	0.00487652	0.0225686	CRISPLD1
ncbi_114111483	0.27	0.76	0.19	0.89	0.19	0.21	0.2	0.14	0.5275	0.185	-1.51165	0.00491745	0.0226993	NAA50
ncbi_106990118	0.04	0.02	0.05	0.01	0.04	0.2	0.33	0.07	0.03	0.16	2.41504	0.00492486	0.0227222	CD163
ncbi_101104939	0.22	0.52	0.56	1.3	0.39	0.09	0.22	0.15	0.65	0.2125	-1.61298	0.00493243	0.0227433	PAQR8
ncbi_443246	0.98	0.94	1.16	1.28	0.23	0.7	0.54	0.7	1.09	0.5425	-1.00663	0.00513564	0.0234924	SLC1A3
ncbi_105607253	0.14	0.19	0.09	0.12	0.34	0.18	0.42	0.42	0.135	0.34	1.33258	0.00515294	0.0235621	--
ncbi_101119456	0.76	0.74	1.07	0.74	0.35	0.38	0.36	0.39	0.8275	0.37	-1.16123	0.00517642	0.0236501	Set
ncbi_101102607	0.04	0.02	0.08	0.05	0.07	0.35	0.17	0.09	0.0475	0.17	1.83954	0.00518428	0.0236788	Neto1
ncbi_101106227	0.63	1.18	0.3	1.32	2.15	1.28	1.5	2.48	0.8575	1.8525	1.11126	0.00524051	0.0238625	SPTSSA
ncbi_101112286	0	0	0	0	0	0.03	0.04	0.09	0.001	0.04	5.32193	0.00525613	0.0239196	PHEX
ncbi_101102971	11.73	28.63	18.73	26.74	4.23	12.76	8.15	9.27	21.4575	8.6025	-1.31865	0.00525813	0.0239215	Atoh8
ncbi_101110518	0.91	2.28	2.83	1.65	0.98	0.98	1	0.37	1.9175	0.8325	-1.2037	0.00526464	0.0239438	PEX2
ncbi_106990219	0	0.12	0.03	0	0.69	0.13	0.39	0.08	0.0375	0.3225	3.10434	0.00526657	0.0239454	GSTM1
ncbi_101102632	1.4	3.3	1.56	3.46	1.04	1.37	0.89	1.36	2.43	1.165	-1.06063	0.00533859	0.0242141	OSR1
ncbi_114116078	0	0.37	0.06	0.21	1.08	0.6	0.46	0.52	0.16	0.665	2.05528	0.00539852	0.0244365	ULBP1
ncbi_101123641	0.26	0.28	0.13	0.08	0.41	0.38	0.82	0.26	0.1875	0.4675	1.31808	0.00540955	0.0244681	KLF5
ncbi_101116059	0.24	0.13	0.34	0.11	0.1	0.02	0.08	0.03	0.205	0.0575	-1.83399	0.00550379	0.0247854	SNAP91
ncbi_101103328	0.33	0.18	0.13	0.3	0.39	0.7	0.66	0.46	0.235	0.5525	1.23331	0.0055061	0.0247854	BAALC
ncbi_443530	0.54	0.4	0.43	0.45	0.18	0.15	0.11	0.24	0.455	0.17	-1.42033	0.00557295	0.0250274	HSD11B2
ncbi_100147800	1.82	1.49	3.15	2.48	1.04	1.16	1.36	0.64	2.235	1.05	-1.08989	0.00567539	0.0254114	SLC25A10
ncbi_101123616	0.91	0.52	0.74	1	0.36	0.4	0.27	0.37	0.7925	0.35	-1.17906	0.00568126	0.0254301	Dhh
ncbi_101121943	0.93	0.39	0.55	0.68	0.15	0.3	0.23	0.25	0.6375	0.2325	-1.45519	0.0057052	0.0254566	CTHRC1
ncbi_101102907	0.04	0	0	0.06	0.11	0.16	0.16	0.12	0.025	0.1375	2.45943	0.0057269	0.0255126	RTN1
ncbi_101111154	0.47	0.73	0.82	0.77	0.36	0.15	0.31	0.32	0.6975	0.285	-1.29123	0.00578966	0.0257769	C1orf131
ncbi_114108599	3.34	2.35	4.42	1.16	1.16	0.83	1.95	0.23	2.8175	1.0425	-1.43437	0.0057953	0.0257937	CDC42
ncbi_101116876	0.06	0	0.09	0.02	0.32	0.18	0.08	0.24	0.0425	0.205	2.27009	0.00579687	0.0257937	DKK1
ncbi_106991302	0.24	0.75	0.46	0.52	0.05	0.16	0	0.17	0.4925	0.095	-2.37412	0.00583963	0.0259378	ULBP1
ncbi_101114494	8.13	1.67	5.46	3.99	16.57	7.15	6.7	17.16	4.8125	11.895	1.3055	0.00600544	0.0265729	NR4A2
ncbi_101114354	0.04	0.12	0.02	0.04	0.19	0.26	0.11	0.18	0.055	0.185	1.75002	0.00603721	0.0266889	STK32A
ncbi_105614373	0.12	0.03	0.2	0.05	0.12	0.38	0.52	0.17	0.1	0.2975	1.57289	0.00606299	0.0267714	CYP2B4
ncbi_100144423	0	0	0	0	0.07	0.07	0.05	0.14	0.001	0.0825	6.36632	0.00609432	0.0268781	CYP19A1
ncbi_101102112	3.04	0.83	1.93	1.51	1.07	0.43	1.02	0.76	1.8275	0.82	-1.15618	0.00611779	0.0269657	BCHE
ncbi_101102504	0.63	0.71	0.73	0.92	0.42	0.13	0.33	0.19	0.7475	0.2675	-1.48253	0.00613804	0.0270391	MMP23
ncbi_101104575	0	0.04	0	0	0	0.2	0.2	0.11	0.01	0.1275	3.67243	0.00617427	0.0271668	YJEFN3
ncbi_105603284	2.45	4.54	8.64	6.23	2.49	3.08	1.65	2.75	5.465	2.4925	-1.13263	0.00620924	0.0272886	CRIP1
ncbi_101105509	8.79	19.57	10.54	25.54	5.06	9.15	6.22	7.21	16.11	6.91	-1.2212	0.00630094	0.0275464	AKAP12
ncbi_101115573	0.04	0.07	0.01	0.04	0.05	0.36	0.06	0.37	0.04	0.21	2.39232	0.00633718	0.0276485	NIM1K
ncbi_101102324	0.77	0.56	0.76	0.58	0.37	0.14	0.31	0.24	0.6675	0.265	-1.33278	0.00640807	0.027901	METTL18
ncbi_105616536	0.58	0.96	0.72	0.82	0.35	0.32	0.51	0.22	0.77	0.35	-1.1375	0.00641497	0.0279229	FNDC10
ncbi_101120290	0.26	0.16	0.19	0.08	0.45	0.5	0.53	0.43	0.1725	0.4775	1.4689	0.00648776	0.0281988	CCDC68
ncbi_101105132	7.56	9.21	13.62	10.54	1.62	4.86	0.37	3.39	10.2325	2.56	-1.99894	0.00650892	0.0282662	DNAJA1
ncbi_105616883	0.15	0.12	0.13	0.04	0.56	0.22	0.93	0.27	0.11	0.495	2.16993	0.00656439	0.0284741	DCXR
ncbi_101103065	1.74	2.92	2.62	1.43	0.83	1.16	0.55	1.61	2.1775	1.0375	-1.06956	0.00658336	0.0285152	SNAPC2
ncbi_114116676	0.33	0.17	0.73	0.69	0.06	0.18	0	0.08	0.48	0.08	-2.58496	0.00666334	0.0288367	ITGBL1
ncbi_114115272	0.21	0.71	0.4	0.37	0.09	0.07	0	0	0.4225	0.04	-3.40088	0.00691276	0.0296687	MCUB
ncbi_114114571	0.02	0	0.02	0.01	0	0.27	0.03	0.21	0.0125	0.1275	3.3505	0.00692092	0.0296859	GIMAP8
ncbi_101117107	0.02	0	0	0	0.12	0.09	0.08	0.04	0.005	0.0825	4.04439	0.0069495	0.029783	GZMA
ncbi_101105140	0.28	0.4	0.42	0.18	0.14	0.16	0.03	0.06	0.32	0.0975	-1.7146	0.00702821	0.0300945	ZNF185
ncbi_101109148	0.09	0.03	0.07	0.05	0.07	0.22	0.17	0.1	0.06	0.14	1.22239	0.00706631	0.0302404	UNC5D
ncbi_101122115	0.35	0	0.11	0.35	0.93	3.9	0.64	0.76	0.2025	1.5575	2.94324	0.007135	0.0304822	KIAA0408
ncbi_101114872	5.03	3.91	3.91	3.83	0.52	2.48	0.66	3	4.17	1.665	-1.32453	0.00721674	0.030709	CHAC1
ncbi_114110071	0.06	0.02	0.01	0.04	0	0	0	0	0.0325	0.001	-5.02237	0.00732396	0.0311123	pol
ncbi_101110964	0.39	0.83	0.59	0.6	0.26	0.1	0	0.36	0.6025	0.18	-1.74296	0.00733873	0.0311574	ZNF835
ncbi_101108684	43.6	163.65	186.07	32.33	332.55	298.56	301.81	286.03	106.412	304.738	1.5179	0.00737017	0.0312643	RPS3
ncbi_114116116	0	0.07	0	0	0	0.33	1.42	1.88	0.0175	0.9075	5.69647	0.00738283	0.0313028	ULBP1
ncbi_101108502	0.27	0.55	0.29	0.14	1.17	0.36	0.45	1.22	0.3125	0.8	1.35614	0.0073834	0.0313028	ALDH3A1
ncbi_443066	0.16	0.1	0	0.06	0.19	0.24	0.65	0.24	0.08	0.33	2.04439	0.0074318	0.0314369	ESR2
ncbi_114112996	5.32	1.71	3.12	3.18	2.29	0	0.67	0.52	3.3325	0.87	-1.93752	0.00743402	0.0314374	Magoh
ncbi_101110182	0.63	0.86	0.68	0.74	0.48	0.14	0.38	0.36	0.7275	0.34	-1.09741	0.00749639	0.0316744	LCMT2
MSTRG.19184	0.31	0.58	0.21	0.53	0.52	2.2	0.98	2.5	0.4075	1.55	1.9274	0.00751474	0.0317341	GBP2
ncbi_101120781	1.17	1	0.65	1.5	0.38	0.36	0.62	0.48	1.08	0.46	-1.23133	0.00757952	0.0319447	BDKRB2
ncbi_101105944	0.07	0.06	0.07	0.02	0.23	0.09	0.16	0.12	0.055	0.15	1.44746	0.0076425	0.032165	Nrip3
ncbi_105602076	0.13	0.32	0.1	0.17	0.02	0.02	0.08	0.04	0.18	0.04	-2.16993	0.00766469	0.0322042	--
ncbi_101108553	6.14	1.2	4.55	1.06	8.74	6.52	12.17	8.74	3.2375	9.0425	1.48184	0.00775677	0.0325	ZNF395
ncbi_101110324	17.72	67.02	36.6	53.88	74.32	99.67	109	80.66	43.805	90.9125	1.05338	0.00776579	0.0325287	ARRDC2
ncbi_114112948	0.05	0.05	0.19	0.13	0	0	0	0	0.105	0.001	-6.71425	0.00777532	0.0325595	NTRK2
ncbi_101108867	13.72	3.27	6.85	5.29	27.44	11.89	11.06	17.16	7.2825	16.8875	1.21345	0.00782069	0.0326766	IER3
ncbi_101106363	0.18	0.03	0.07	0.03	0.21	0.17	0.37	0.28	0.0775	0.2575	1.7323	0.00783728	0.0327066	LRRC70
ncbi_101103335	0.27	0.19	0.48	0.32	0.06	0.15	0.07	0.15	0.315	0.1075	-1.55102	0.00795897	0.0331069	Tfcp2l1
ncbi_101109284	0.2	0.18	0.16	0.23	0.23	0.55	0.43	0.46	0.1925	0.4175	1.11692	0.00802217	0.0332775	TMEM106A
ncbi_101118547	0.47	0.49	0.67	0.23	0.27	0.05	0.25	0.13	0.465	0.175	-1.40988	0.00809487	0.0335206	SLC2A10
ncbi_101103371	0.09	0.14	0.13	0.14	0.05	0	0.07	0.01	0.125	0.0325	-1.94342	0.00809641	0.0335206	Lrrc15
ncbi_101120167	0.56	0.34	0.88	0.68	0.3	0.44	0.13	0.27	0.615	0.285	-1.10962	0.00810604	0.0335419	PLEKHG3
ncbi_101116101	0.05	0.04	0.07	0	0	0	0	0	0.04	0.001	-5.32193	0.00812636	0.0335957	KCNJ5
ncbi_101123425	0.06	0.09	0.09	0.05	0.08	0.17	0.3	0.2	0.0725	0.1875	1.37084	0.00836278	0.0343862	SV2A
ncbi_101112535	0.21	0.32	0.27	0.37	0.11	0.18	0.12	0.1	0.2925	0.1275	-1.19794	0.00848518	0.0348153	DZIP1L
ncbi_101115646	0.39	0.19	0.43	0.46	0.09	0.15	0.03	0.19	0.3675	0.115	-1.67611	0.00851281	0.034917	CLEC18A
ncbi_100233164	0	0	0	0	0.01	0.08	0	0.15	0.001	0.06	5.90689	0.0085491	0.0350371	CNGA3
ncbi_101118179	0.02	0.01	0.01	0.03	0.04	0.05	0.09	0.03	0.0175	0.0525	1.58496	0.00863989	0.0353127	GRIN2B
ncbi_101110522	1.31	0.99	0.87	1.07	0.62	0.24	0.82	0.43	1.06	0.5275	-1.00682	0.008667	0.0353946	PIGW
ncbi_101103741	25.5	61.44	32.17	62.48	9.55	29	15.82	18.86	45.3975	18.3075	-1.31018	0.00879863	0.0358346	METRNL
ncbi_101109370	0.04	0.03	0.07	0.05	0	0	0	0	0.0475	0.001	-5.56986	0.00880641	0.0358513	ABCC4
ncbi_101119486	5.34	4.78	1.23	2.81	5.49	7.64	11.42	7.53	3.54	8.02	1.17985	0.00881616	0.035867	JUP
ncbi_101102922	0.9	2.36	2.08	2.13	0.74	1.08	1.43	0.47	1.8675	0.93	-1.00581	0.00884068	0.0359473	ZNF146
ncbi_101105361	0.08	1.15	0.28	0.4	0.21	0.08	0	0	0.4775	0.0725	-2.71945	0.00890529	0.036161	GDPGP1
ncbi_101103983	0.52	0.1	0.25	0.29	0.77	0.62	0.61	0.57	0.29	0.6425	1.14764	0.00901524	0.0365186	TEX9
ncbi_101119287	0	0.7	0.46	0	1.98	1.18	0.88	1.32	0.29	1.34	2.20811	0.00936803	0.0376932	BCAS2
ncbi_101103615	1.22	0.55	0.15	1.1	1.76	1.53	1.84	1.36	0.755	1.6225	1.10367	0.00938206	0.0377092	MOSPD3
ncbi_101114337	0.05	0.03	0.03	0.06	0.1	0.12	0.12	0.06	0.0425	0.1	1.23447	0.00951442	0.0381783	TRPM6
ncbi_101105818	0.07	0.05	0.09	0.13	0.02	0	0.02	0.01	0.085	0.0125	-2.76553	0.00955121	0.0382763	SLC25A41
ncbi_114116131	0.09	0.05	0.2	0.25	0.35	0.44	0.65	0.22	0.1475	0.415	1.4924	0.00956752	0.0383045	LRP11
ncbi_443075	0.06	0.05	0.05	0.02	0.07	0.16	0.14	0.09	0.045	0.115	1.35364	0.00961171	0.0384239	HGF
ncbi_101117786	0.68	0.5	0.74	0.58	0.27	0.16	0.52	0.26	0.625	0.3025	-1.04692	0.00961367	0.0384239	CYP2R1
ncbi_105611081	0.39	0.27	0.5	0.25	0.18	0.13	0.17	0.04	0.3525	0.13	-1.43911	0.00966296	0.0386004	ZBED8
ncbi_101119972	0	0	0	0	0.01	0.02	0.16	0.03	0.001	0.055	5.78136	0.00966627	0.0386033	SLCO1A2
ncbi_101123474	0.12	0.11	0.1	0.1	0.21	0.23	0.21	0.23	0.1075	0.22	1.03317	0.00968161	0.0386543	EVI2B
ncbi_101113794	0.1	0.04	0.07	0.14	0.08	0.34	0.2	0.33	0.0875	0.2375	1.44057	0.00979254	0.0390452	RIMBP2
MSTRG.14833	0.49	0.54	0.91	0.29	0.65	1.55	1.02	1.47	0.5575	1.1725	1.07254	0.00992082	0.0394663	IGHA2
ncbi_105603393	0.25	0	0.47	0.5	0	0	0	0	0.305	0.001	-8.25267	0.00992242	0.0394663	CBX3
ncbi_101117396	1.95	1.07	0.73	0.38	2	2.1	1.91	3.5	1.0325	2.3775	1.2033	0.0099395	0.0395049	KLF7
ncbi_101105662	0.39	1.14	0.89	0.78	0.25	0.29	0.36	0.48	0.8	0.345	-1.2134	0.0100152	0.0397529	GLDN
ncbi_101122380	0.04	0	0	0.01	0.04	0.09	0.07	0.15	0.0125	0.0875	2.80735	0.0101415	0.0401659	PRRG4
ncbi_101106305	0.07	0.07	0.09	0.05	0.09	0.19	0.13	0.19	0.07	0.15	1.09954	0.0103797	0.0409836	ADAMTS14
ncbi_101113042	0.91	0.62	0.39	0.83	0.42	0.14	0.37	0.34	0.6875	0.3175	-1.1146	0.010448	0.0411774	OSGEPL1
ncbi_101114470	0.1	0.35	0.53	0.48	0	0	0	0.06	0.365	0.015	-4.60486	0.010582	0.0416179	FAM174B
ncbi_101104882	0	0	0	0	0.03	0.02	0.09	0.02	0.001	0.04	5.32193	0.0106265	0.041782	GMNC
ncbi_101110017	0.14	0	0.17	0.07	0.21	0.48	0.44	0.43	0.095	0.39	2.03747	0.0106527	0.04183	FAIM
ncbi_101116069	3.28	11.22	5.67	13.66	3.32	3.1	3.24	4.13	8.4575	3.4475	-1.29468	0.010664	0.0418636	SLC16A6
ncbi_443111	0.08	0.03	0	0.09	0.28	0.15	0.51	0.13	0.05	0.2675	2.41954	0.0107554	0.0421454	CCR3
ncbi_101103816	0.91	1.31	1.3	1.74	0.4	0.53	0.33	0.71	1.315	0.4925	-1.41687	0.0108495	0.0424507	--
ncbi_101109548	0.11	0.19	0.15	0.16	0.07	0.02	0.04	0.03	0.1525	0.04	-1.93074	0.010949	0.0427697	RNF112
ncbi_101116953	0	0	0	0	0.12	0.41	0	0	0.001	0.1325	7.04985	0.0109695	0.0428276	AMDHD2
ncbi_105605766	2.1	1.41	1.84	1	0.45	1.35	0.77	0.53	1.5875	0.775	-1.03449	0.0110204	0.0430094	APOL2
ncbi_101109515	0.92	0.99	0.97	0.62	0.26	0.64	0	0.18	0.875	0.27	-1.69632	0.0110606	0.0431048	CITED1
ncbi_101110784	0.52	0.32	0.68	0.54	0.2	0.1	0.21	0.25	0.515	0.19	-1.43857	0.0111607	0.0434161	Ceacam16
ncbi_114116484	0.1	0.11	0.32	0.05	0.19	0.38	0.53	0.39	0.145	0.3725	1.36119	0.0114082	0.0442285	N4BP2
ncbi_101118116	0.9	0.63	0.69	0.92	0.17	0.52	0.18	0.43	0.785	0.325	-1.27225	0.0114154	0.0442348	Ybx2
ncbi_101107210	1.57	0.7	1.27	1.65	0.52	1	0.6	0.13	1.2975	0.5625	-1.20581	0.0114363	0.0442927	SOX13
ncbi_443068	0.2	0.19	0.15	0.46	0	0	0.05	0.09	0.25	0.035	-2.8365	0.0115617	0.0446633	MDFI
ncbi_101121678	0.14	0.42	0.51	0.27	0.07	0	0.09	0	0.335	0.04	-3.06609	0.0116047	0.0447832	LEAP2
ncbi_101105817	0.25	0.22	0.19	0.52	0.14	0.09	0.18	0.1	0.295	0.1275	-1.21022	0.0116507	0.0449011	ARHGEF5
ncbi_101105489	0.25	0.34	0.19	0.5	0.27	0.91	0.67	0.84	0.32	0.6725	1.07146	0.0116532	0.0449011	PAX8
ncbi_101121755	0.09	0.05	0.09	0.06	0.01	0.02	0.02	0	0.0725	0.0125	-2.53605	0.0117607	0.0451663	--
ncbi_101118856	0.02	0.11	0.03	0.11	0	0	0	0	0.0675	0.001	-6.07682	0.0119112	0.0456373	CYP27C1
ncbi_101102834	0.12	0.03	0.08	0.08	0.01	0	0	0	0.0775	0.0025	-4.9542	0.0119507	0.0457537	DRC7
ncbi_105602107	0.16	0.14	0.03	0.14	0.25	0.25	0.23	0.35	0.1175	0.27	1.2003	0.0120708	0.0461426	ZNF543
ncbi_101102235	0.13	0.14	0.17	0.04	0.02	0.02	0.01	0.06	0.12	0.0275	-2.12553	0.0120961	0.0462275	ADAMTS19
ncbi_101121925	0.21	0.18	0.39	0.35	0.5	0.98	0.25	0.78	0.2825	0.6275	1.15136	0.0122269	0.0466561	ADA2
ncbi_101123045	0	0	2.19	1.59	0	0	0	0	0.945	0.001	-9.88417	0.0123409	0.0469874	PGGT1B
ncbi_114108841	0	0	0.05	0	0.09	0.09	0.32	0.16	0.0125	0.165	3.72247	0.012377	0.0470967	IGLL5
ncbi_101113965	4.33	1.49	4.81	1.6	5.69	11.2	3.02	10.34	3.0575	7.5625	1.30651	0.0125613	0.0477259	Ubd
ncbi_443175	0.97	0.72	0.74	1.08	0.55	0.31	0.39	0.48	0.8775	0.4325	-1.0207	0.0127383	0.0483129	BMP7
ncbi_105604361	0.22	0.38	0.14	0.29	0.07	0	0.13	0.04	0.2575	0.06	-2.10154	0.0127778	0.0483893	C10orf62
ncbi_114108739	1.74	0.03	1.21	0.39	3.8	2.9	4.39	3.63	0.8425	3.68	2.12696	0.012782	0.0483929	GBP2
ncbi_101116766	0.6	0.36	0.52	1.26	0.13	0.2	0.19	0.34	0.685	0.215	-1.67177	0.0127953	0.0484221	MGARP
ncbi_494440	0.84	1.38	0.46	1.73	0.64	0.5	0.37	0.59	1.1025	0.525	-1.07039	0.012899	0.0487007	SLC4A4
ncbi_101115875	0.5	0.6	0.81	0.33	0.29	0.16	0.38	0.25	0.56	0.27	-1.05247	0.013062	0.0491792	ANKRD24
ncbi_101113828	0.75	1.42	1.6	0.7	0.59	0.5	0.28	0.38	1.1175	0.4375	-1.35292	0.0131134	0.0492745	PCSK1N
ncbi_114113033	0.27	0.06	0.06	0.1	0.02	0	0	0	0.1225	0.005	-4.61471	0.013172	0.0494205	SCRG1
ncbi_101119167	0.67	0.55	1.25	0.55	0.28	0.1	0.18	0.5	0.755	0.265	-1.51048	0.0132506	0.0496163	Slc25a47
ncbi_101113844	0.14	0.07	0.12	0.28	0.05	0	0.05	0.05	0.1525	0.0375	-2.02385	0.0133195	0.0498493	GBX1
