# Supplementary material for: Comparative Transcriptome Analysis Reveals the Mechanism Associated With Dynamic Changes in Meat Quality of the Longissimus Thoracis Muscle in Tibetan Sheep at Different Growth Stages
Source: Front Vet Sci. 2022 Jul 6;9:926725. doi: 10.3389/fvets.2022.926725 (PMC9298548; doi:10.3389/fvets.2022.926725)
Supplement: Supplementary Table 3 — The information of DEGs of the contiguous period transcriptome comparative groups. [file Table_3.XLSX]

## Sheet: 4 m vs 1.5 y
Significant results of GO results in the 4 m vs 1.5 y
GO ID	GO Term	number_of_A-vs-B (up)	number_of_A-vs-B (down)	Genes_of_A-vs-B_up	Genes_of_A-vs-B_down
GO:0002376	immune system process	38	14	MSTRG.14833(IGHA2),MSTRG.19184(GBP2),MSTRG.8153(EEF2),ncbi_100127218(AHSP),ncbi_101102194(IFIT1),ncbi_101103683(IRF7),ncbi_101106266(F2RL1),ncbi_101107257(DDX58),ncbi_101109915(OAS2),ncbi_101110084(TRPM4),ncbi_101111234(IRF4),ncbi_101111722(CXCL16),ncbi_101112041(MEIS1),ncbi_101113426(PRKCQ),ncbi_101115013(RSAD2),ncbi_101115044(CCL14),ncbi_101115290(CCL16),ncbi_101115321(C2),ncbi_101115906(PATZ1)…	ncbi_101103410(Hes5),ncbi_101103656(JMJD6),ncbi_101108206(TTC7A),ncbi_101108953(PDE4D),ncbi_101110596(GPX2),ncbi_101113016(CX3CR1),ncbi_101113579(CALCR),ncbi_101115261(DDX60),ncbi_101117815(SH2B2),ncbi_101118902(DYNLL1),ncbi_101120392(BoLA-DQB),ncbi_114114906(CALR),ncbi_114116088(RAET1G),ncbi_443058(SPP1)
GO:0048511	rhythmic process	5	2	ncbi_100125623(PER3),ncbi_101116794(CIART),ncbi_101119104(RORC),ncbi_443419(STAT5A),ncbi_443457(PPARA)	ncbi_101116417(SUV39H2),ncbi_443262(ARNTL)
GO:0051704	multi-organism process	28	15	MSTRG.14833(IGHA2),MSTRG.19184(GBP2),MSTRG.8153(EEF2),ncbi_100034669(TAC1),ncbi_100217400(BTG1),ncbi_101102194(IFIT1),ncbi_101105594(CCDC155),ncbi_101106266(F2RL1),ncbi_101106565(ADAMTS4),ncbi_101107257(DDX58),ncbi_101107597(RPL10A),ncbi_101108688(CREBRF),ncbi_101109915(OAS2),ncbi_101111234(IRF4),ncbi_101111722(CXCL16),ncbi_101115013(RSAD2),ncbi_101115906(PATZ1),ncbi_101118325(ZC3H12A),ncbi_10111…	MSTRG.16891(CCT6A),MSTRG.4689(MGST1),ncbi_100307048(SPARC),ncbi_101106132(Sox8),ncbi_101108412(MATN4),ncbi_101108953(PDE4D),ncbi_101109032(--),ncbi_101109515(CITED1),ncbi_101110596(GPX2),ncbi_101115261(DDX60),ncbi_101116370(HS3ST2),ncbi_101118902(DYNLL1),ncbi_105601845(RPL10),ncbi_106990107(TPT1),ncbi_443262(ARNTL)
GO:0040011	locomotion	21	17	MSTRG.15496(--),ncbi_100034669(TAC1),ncbi_100217400(BTG1),ncbi_101105627(PBLD),ncbi_101105908(STRIP2),ncbi_101106266(F2RL1),ncbi_101107094(ARRDC3),ncbi_101107254(PCNT),ncbi_101107257(DDX58),ncbi_101111414(SMAD7),ncbi_101111722(CXCL16),ncbi_101112949(STC1),ncbi_101113426(PRKCQ),ncbi_101114448(Ttc8),ncbi_101114494(NR4A2),ncbi_101115044(CCL14),ncbi_101115290(CCL16),ncbi_101120169(Arc),ncbi_101120892…	ncbi_100307048(SPARC),ncbi_101106132(Sox8),ncbi_101106801(PLXND1),ncbi_101108953(PDE4D),ncbi_101109032(--),ncbi_101112745(ABI3),ncbi_101113016(CX3CR1),ncbi_101116446(NTN3),ncbi_101116611(PLXNA1),ncbi_101118946(UNC5A),ncbi_101119787(RET),ncbi_101120047(RASGEF1A),ncbi_101122152(NANOS1),ncbi_101122928(EPHB2),ncbi_105602066(CD63),ncbi_114114906(CALR),ncbi_443058(SPP1)
GO:0032502	developmental process	56	58	MSTRG.15496(--),MSTRG.8153(EEF2),ncbi_100127218(AHSP),ncbi_100137067(FABP4),ncbi_100217400(BTG1),ncbi_101105177(TGM3),ncbi_101105489(PAX8),ncbi_101105544(Tgif1),ncbi_101105594(CCDC155),ncbi_101105627(PBLD),ncbi_101105908(STRIP2),ncbi_101106266(F2RL1),ncbi_101107094(ARRDC3),ncbi_101107254(PCNT),ncbi_101107597(RPL10A),ncbi_101107726(MAMSTR),ncbi_101108502(ALDH3A1),ncbi_101111187(STEAP4),ncbi_101111…	MSTRG.4689(MGST1),MSTRG.5042(Ralbp1),ncbi_100125616(TNMD),ncbi_100135448(ARNT2),ncbi_100307048(SPARC),ncbi_101103410(Hes5),ncbi_101103656(JMJD6),ncbi_101103679(PKHD1),ncbi_101103800(ROCK2),ncbi_101104991(FBN2),ncbi_101105592(Jph2),ncbi_101105814(MYCN),ncbi_101106132(Sox8),ncbi_101106263(SHROOM3),ncbi_101106801(PLXND1),ncbi_101106877(CHRDL2),ncbi_101106898(POPDC2),ncbi_101107864(COMP),ncbi_1011082…
GO:0008152	metabolic process	155	99	MSTRG.14833(IGHA2),MSTRG.15496(--),MSTRG.8153(EEF2),ncbi_100127218(AHSP),ncbi_100137067(FABP4),ncbi_100142676(FBXO32),ncbi_100147780(SLC25A33),ncbi_100169699(LIPE),ncbi_100217400(BTG1),ncbi_100820742(GPX1),ncbi_101102070(DPYS),ncbi_101102194(IFIT1),ncbi_101102276(PMF1),ncbi_101102533(SH2D4A),ncbi_101102930(Trim23),ncbi_101103279(GLMP),ncbi_101103503(AMPD3),ncbi_101103510(FANCI),ncbi_101103683(IRF…	MSTRG.4689(MGST1),MSTRG.5042(Ralbp1),ncbi_100037690(PCK1),ncbi_100125351(SQLE),ncbi_100135448(ARNT2),ncbi_100144429(MCT7),ncbi_100170113(CYP1A1),ncbi_101102324(METTL18),ncbi_101102903(ADAMTS3),ncbi_101103031(AK4),ncbi_101103410(Hes5),ncbi_101103609(Npm3),ncbi_101103656(JMJD6),ncbi_101103679(PKHD1),ncbi_101103800(ROCK2),ncbi_101103861(CPXM2),ncbi_101104142(IKZF4),ncbi_101104393(SREBF2),ncbi_101104…
GO:0098754	detoxification	1	0	ncbi_101117116(TXNRD3)	--
GO:0050896	response to stimulus	97	68	MSTRG.14833(IGHA2),MSTRG.15496(--),MSTRG.19184(GBP2),MSTRG.8153(EEF2),ncbi_100034669(TAC1),ncbi_100125623(PER3),ncbi_100137067(FABP4),ncbi_100142676(FBXO32),ncbi_100147780(SLC25A33),ncbi_100217400(BTG1),ncbi_100302075(Rasd1),ncbi_100820742(GPX1),ncbi_101102194(IFIT1),ncbi_101102930(Trim23),ncbi_101103279(GLMP),ncbi_101103655(XAF1),ncbi_101103683(IRF7),ncbi_101105489(PAX8),ncbi_101105544(Tgif1),nc…	MSTRG.4689(MGST1),MSTRG.5042(Ralbp1),ncbi_100037690(PCK1),ncbi_100170113(CYP1A1),ncbi_100302744(Cib2),ncbi_100307048(SPARC),ncbi_101102903(ADAMTS3),ncbi_101103410(Hes5),ncbi_101103656(JMJD6),ncbi_101103679(PKHD1),ncbi_101103800(ROCK2),ncbi_101103837(ABTB2),ncbi_101104393(SREBF2),ncbi_101104991(FBN2),ncbi_101105292(CASQ2),ncbi_101105592(Jph2),ncbi_101105713(PLK1),ncbi_101106801(PLXND1),ncbi_101106…
GO:0044699	single-organism process	166	132	MSTRG.14833(IGHA2),MSTRG.15496(--),MSTRG.19184(GBP2),MSTRG.8153(EEF2),ncbi_100034669(TAC1),ncbi_100125354(PLIN2),ncbi_100126573(TES),ncbi_100127218(AHSP),ncbi_100137067(FABP4),ncbi_100147780(SLC25A33),ncbi_100169699(LIPE),ncbi_100217400(BTG1),ncbi_100302075(Rasd1),ncbi_100820742(GPX1),ncbi_101102070(DPYS),ncbi_101102276(PMF1),ncbi_101102386(SLC13A4),ncbi_101102930(Trim23),ncbi_101103279(GLMP),ncb…	MSTRG.16891(CCT6A),MSTRG.4689(MGST1),MSTRG.5042(Ralbp1),ncbi_100037690(PCK1),ncbi_100125351(SQLE),ncbi_100125616(TNMD),ncbi_100135448(ARNT2),ncbi_100170113(CYP1A1),ncbi_100302744(Cib2),ncbi_100307048(SPARC),ncbi_101102903(ADAMTS3),ncbi_101103031(AK4),ncbi_101103410(Hes5),ncbi_101103501(Grik5),ncbi_101103656(JMJD6),ncbi_101103679(PKHD1),ncbi_101103800(ROCK2),ncbi_101104118(NPTX2),ncbi_101104393(SR…
GO:0040007	growth	15	4	ncbi_100147780(SLC25A33),ncbi_100217400(BTG1),ncbi_101107254(PCNT),ncbi_101111722(CXCL16),ncbi_101112949(STC1),ncbi_101113426(PRKCQ),ncbi_101114448(Ttc8),ncbi_101114816(ACACB),ncbi_101122544(OSGIN1),ncbi_101123490(BBC3),ncbi_114113217(Erbb4),ncbi_114115942(GAS2L1),ncbi_443090(GPD2),ncbi_443135(PTHLH),ncbi_443419(STAT5A)	ncbi_101108953(PDE4D),ncbi_101109032(--),ncbi_101122263(EI24),ncbi_443534(LEP)
GO:0051179	localization	60	55	MSTRG.14833(IGHA2),ncbi_100034669(TAC1),ncbi_100125354(PLIN2),ncbi_100137067(FABP4),ncbi_100147780(SLC25A33),ncbi_100217400(BTG1),ncbi_101101923(SEC14L4),ncbi_101102194(IFIT1),ncbi_101102386(SLC13A4),ncbi_101104046(SLC19A3),ncbi_101104932(UCP2),ncbi_101105489(PAX8),ncbi_101105594(CCDC155),ncbi_101105627(PBLD),ncbi_101105854(VPS33B),ncbi_101105908(STRIP2),ncbi_101106266(F2RL1),ncbi_101107254(PCNT)…	MSTRG.16891(CCT6A),MSTRG.5042(Ralbp1),ncbi_100147785(SLC25A15),ncbi_100307048(SPARC),ncbi_101103501(Grik5),ncbi_101103656(JMJD6),ncbi_101104393(SREBF2),ncbi_101105033(SLC6A6),ncbi_101105292(CASQ2),ncbi_101105592(Jph2),ncbi_101105713(PLK1),ncbi_101105818(SLC25A41),ncbi_101105907(DPP6),ncbi_101106132(Sox8),ncbi_101106801(PLXND1),ncbi_101108953(PDE4D),ncbi_101109032(--),ncbi_101109515(CITED1),ncbi_1…
GO:0022414	reproductive process	8	14	ncbi_100217400(BTG1),ncbi_101105594(CCDC155),ncbi_101108688(CREBRF),ncbi_101115906(PATZ1),ncbi_101119037(MAPK8IP2),ncbi_101119628(FANCL),ncbi_101120892(HMGB2),ncbi_443419(STAT5A)	MSTRG.16891(CCT6A),MSTRG.4689(MGST1),ncbi_101106077(PCDH12),ncbi_101106132(Sox8),ncbi_101109032(--),ncbi_101109515(CITED1),ncbi_101116417(SUV39H2),ncbi_101116995(RSPO3),ncbi_101118378(IRX5),ncbi_101118902(DYNLL1),ncbi_105601845(RPL10),ncbi_114114906(CALR),ncbi_443262(ARNTL),ncbi_443534(LEP)
GO:0000003	reproduction	8	14	ncbi_100217400(BTG1),ncbi_101105594(CCDC155),ncbi_101108688(CREBRF),ncbi_101115906(PATZ1),ncbi_101119037(MAPK8IP2),ncbi_101119628(FANCL),ncbi_101120892(HMGB2),ncbi_443419(STAT5A)	MSTRG.16891(CCT6A),MSTRG.4689(MGST1),ncbi_101106077(PCDH12),ncbi_101106132(Sox8),ncbi_101109032(--),ncbi_101109515(CITED1),ncbi_101116417(SUV39H2),ncbi_101116995(RSPO3),ncbi_101118378(IRX5),ncbi_101118902(DYNLL1),ncbi_105601845(RPL10),ncbi_114114906(CALR),ncbi_443262(ARNTL),ncbi_443534(LEP)
GO:0001906	cell killing	2	0	ncbi_101106266(F2RL1),ncbi_443419(STAT5A)	--
GO:0007610	behavior	9	4	ncbi_100034669(TAC1),ncbi_100125623(PER3),ncbi_101106266(F2RL1),ncbi_101106412(ASL),ncbi_101108688(CREBRF),ncbi_101114494(NR4A2),ncbi_101116794(CIART),ncbi_101119037(MAPK8IP2),ncbi_101122774(CACNA1B)	ncbi_101104118(NPTX2),ncbi_101108953(PDE4D),ncbi_101122928(EPHB2),ncbi_443534(LEP)
GO:0022610	biological adhesion	11	14	MSTRG.19184(GBP2),ncbi_101111234(IRF4),ncbi_101111414(SMAD7),ncbi_101113426(PRKCQ),ncbi_101113636(VCAM1),ncbi_101115013(RSAD2),ncbi_101119104(RORC),ncbi_114112267(CD164),ncbi_114113694(RSAD2),ncbi_114116100(VNN1),ncbi_443419(STAT5A)	ncbi_101103410(Hes5),ncbi_101103656(JMJD6),ncbi_101104990(CDHR3),ncbi_101105550(COL13A1),ncbi_101106077(PCDH12),ncbi_101107864(COMP),ncbi_101109291(PKP1),ncbi_101109808(COL12A1),ncbi_101113016(CX3CR1),ncbi_101118982(SPON1),ncbi_101119787(RET),ncbi_101122119(PCDH8),ncbi_105602066(CD63),ncbi_443058(SPP1)
GO:0048518	positive regulation of biological process	42	20	MSTRG.14833(IGHA2),ncbi_100034669(TAC1),ncbi_100137067(FABP4),ncbi_100217400(BTG1),ncbi_100820742(GPX1),ncbi_101103683(IRF7),ncbi_101105489(PAX8),ncbi_101105544(Tgif1),ncbi_101106266(F2RL1),ncbi_101107094(ARRDC3),ncbi_101107254(PCNT),ncbi_101107257(DDX58),ncbi_101108051(BMF),ncbi_101108688(CREBRF),ncbi_101108689(TAOK3),ncbi_101110084(TRPM4),ncbi_101111234(IRF4),ncbi_101111414(SMAD7),ncbi_10111294…	ncbi_101102903(ADAMTS3),ncbi_101103410(Hes5),ncbi_101103800(ROCK2),ncbi_101104393(SREBF2),ncbi_101104991(FBN2),ncbi_101105713(PLK1),ncbi_101105907(DPP6),ncbi_101106132(Sox8),ncbi_101108953(PDE4D),ncbi_101110361(DTX4),ncbi_101112844(HSPA8),ncbi_101112873(NOXO1),ncbi_101113579(CALCR),ncbi_101117815(SH2B2),ncbi_101119787(RET),ncbi_101122928(EPHB2),ncbi_114114906(CALR),ncbi_114118433(P2ry2),ncbi_4432…
GO:0048519	negative regulation of biological process	34	23	MSTRG.15496(--),ncbi_100137067(FABP4),ncbi_101102194(IFIT1),ncbi_101105489(PAX8),ncbi_101105544(Tgif1),ncbi_101105627(PBLD),ncbi_101106266(F2RL1),ncbi_101106828(IFI6),ncbi_101107094(ARRDC3),ncbi_101108051(BMF),ncbi_101108688(CREBRF),ncbi_101108689(TAOK3),ncbi_101110819(RBM3),ncbi_101111234(IRF4),ncbi_101111414(SMAD7),ncbi_101112041(MEIS1),ncbi_101112949(STC1),ncbi_101113426(PRKCQ),ncbi_101114494(…	MSTRG.5042(Ralbp1),ncbi_101103410(Hes5),ncbi_101103679(PKHD1),ncbi_101104393(SREBF2),ncbi_101104991(FBN2),ncbi_101105292(CASQ2),ncbi_101105592(Jph2),ncbi_101105814(MYCN),ncbi_101106132(Sox8),ncbi_101108412(MATN4),ncbi_101108786(CHORDC1),ncbi_101108953(PDE4D),ncbi_101109032(--),ncbi_101109187(PI15),ncbi_101109515(CITED1),ncbi_101112844(HSPA8),ncbi_101118525(TLE2),ncbi_101118902(DYNLL1),ncbi_101122…
GO:0009987	cellular process	185	135	MSTRG.14833(IGHA2),MSTRG.15496(--),MSTRG.19184(GBP2),MSTRG.8153(EEF2),ncbi_100034669(TAC1),ncbi_100125623(PER3),ncbi_100137067(FABP4),ncbi_100142676(FBXO32),ncbi_100147780(SLC25A33),ncbi_100169699(LIPE),ncbi_100217400(BTG1),ncbi_100302075(Rasd1),ncbi_100820742(GPX1),ncbi_101102070(DPYS),ncbi_101102194(IFIT1),ncbi_101102223(H1F0),ncbi_101102276(PMF1),ncbi_101102386(SLC13A4),ncbi_101102533(SH2D4A),…	MSTRG.16891(CCT6A),MSTRG.4689(MGST1),MSTRG.5042(Ralbp1),ncbi_100037690(PCK1),ncbi_100125616(TNMD),ncbi_100135448(ARNT2),ncbi_100170113(CYP1A1),ncbi_100302744(Cib2),ncbi_100307048(SPARC),ncbi_101102324(METTL18),ncbi_101102903(ADAMTS3),ncbi_101103031(AK4),ncbi_101103410(Hes5),ncbi_101103501(Grik5),ncbi_101103609(Npm3),ncbi_101103656(JMJD6),ncbi_101103679(PKHD1),ncbi_101103800(ROCK2),ncbi_101104118(…
GO:0023052	signaling	57	49	MSTRG.14833(IGHA2),MSTRG.15496(--),MSTRG.19184(GBP2),ncbi_100034669(TAC1),ncbi_100147780(SLC25A33),ncbi_100302075(Rasd1),ncbi_101102930(Trim23),ncbi_101103279(GLMP),ncbi_101103683(IRF7),ncbi_101105489(PAX8),ncbi_101105544(Tgif1),ncbi_101105627(PBLD),ncbi_101106266(F2RL1),ncbi_101106828(IFI6),ncbi_101107094(ARRDC3),ncbi_101107124(CCNE1),ncbi_101107257(DDX58),ncbi_101108051(BMF),ncbi_101108688(CREB…	ncbi_100302744(Cib2),ncbi_101102903(ADAMTS3),ncbi_101103410(Hes5),ncbi_101103501(Grik5),ncbi_101103656(JMJD6),ncbi_101103679(PKHD1),ncbi_101103800(ROCK2),ncbi_101104118(NPTX2),ncbi_101104991(FBN2),ncbi_101105592(Jph2),ncbi_101106801(PLXND1),ncbi_101106877(CHRDL2),ncbi_101108953(PDE4D),ncbi_101109032(--),ncbi_101109515(CITED1),ncbi_101110290(MRAS),ncbi_101110361(DTX4),ncbi_101111639(CNR1),ncbi_101…
GO:0032501	multicellular organismal process	65	58	MSTRG.14833(IGHA2),MSTRG.15496(--),MSTRG.8153(EEF2),ncbi_100034669(TAC1),ncbi_100125623(PER3),ncbi_100127218(AHSP),ncbi_100142676(FBXO32),ncbi_100217400(BTG1),ncbi_101103503(AMPD3),ncbi_101103683(IRF7),ncbi_101105177(TGM3),ncbi_101105489(PAX8),ncbi_101105544(Tgif1),ncbi_101105594(CCDC155),ncbi_101105627(PBLD),ncbi_101106266(F2RL1),ncbi_101106412(ASL),ncbi_101107094(ARRDC3),ncbi_101107254(PCNT),nc…	MSTRG.16891(CCT6A),MSTRG.5042(Ralbp1),ncbi_100125616(TNMD),ncbi_100135448(ARNT2),ncbi_100302744(Cib2),ncbi_100307048(SPARC),ncbi_101102903(ADAMTS3),ncbi_101103410(Hes5),ncbi_101103656(JMJD6),ncbi_101103800(ROCK2),ncbi_101104118(NPTX2),ncbi_101104991(FBN2),ncbi_101105292(CASQ2),ncbi_101105550(COL13A1),ncbi_101105592(Jph2),ncbi_101105814(MYCN),ncbi_101106132(Sox8),ncbi_101106263(SHROOM3),ncbi_10110…
GO:0044848	biological phase	1	0	ncbi_101120209(UBE2D1)	--
GO:0071840	cellular component organization or biogenesis	50	45	MSTRG.14833(IGHA2),ncbi_100034669(TAC1),ncbi_100147780(SLC25A33),ncbi_100217400(BTG1),ncbi_101102070(DPYS),ncbi_101102223(H1F0),ncbi_101102276(PMF1),ncbi_101105177(TGM3),ncbi_101105489(PAX8),ncbi_101105501(LNX1),ncbi_101105594(CCDC155),ncbi_101105627(PBLD),ncbi_101105854(VPS33B),ncbi_101105908(STRIP2),ncbi_101106266(F2RL1),ncbi_101106288(H1FX),ncbi_101106828(IFI6),ncbi_101107254(PCNT),ncbi_101107…	MSTRG.16891(CCT6A),MSTRG.4689(MGST1),MSTRG.5042(Ralbp1),ncbi_100307048(SPARC),ncbi_101103410(Hes5),ncbi_101103501(Grik5),ncbi_101103656(JMJD6),ncbi_101103679(PKHD1),ncbi_101103800(ROCK2),ncbi_101105292(CASQ2),ncbi_101105595(SDHAF1),ncbi_101105713(PLK1),ncbi_101105907(DPP6),ncbi_101106263(SHROOM3),ncbi_101106801(PLXND1),ncbi_101107864(COMP),ncbi_101108786(CHORDC1),ncbi_101108953(PDE4D),ncbi_101109…
GO:0065007	biological regulation	119	92	MSTRG.14833(IGHA2),MSTRG.15496(--),MSTRG.19184(GBP2),MSTRG.8153(EEF2),ncbi_100034669(TAC1),ncbi_100125354(PLIN2),ncbi_100125623(PER3),ncbi_100127218(AHSP),ncbi_100137067(FABP4),ncbi_100142676(FBXO32),ncbi_100147780(SLC25A33),ncbi_100217400(BTG1),ncbi_100302075(Rasd1),ncbi_100820742(GPX1),ncbi_101102194(IFIT1),ncbi_101102276(PMF1),ncbi_101102533(SH2D4A),ncbi_101102930(Trim23),ncbi_101103279(GLMP),…	MSTRG.5042(Ralbp1),ncbi_100125616(TNMD),ncbi_100135448(ARNT2),ncbi_100302744(Cib2),ncbi_100307048(SPARC),ncbi_101102903(ADAMTS3),ncbi_101103410(Hes5),ncbi_101103501(Grik5),ncbi_101103656(JMJD6),ncbi_101103679(PKHD1),ncbi_101103800(ROCK2),ncbi_101104142(IKZF4),ncbi_101104393(SREBF2),ncbi_101104991(FBN2),ncbi_101105292(CASQ2),ncbi_101105585(RAPGEFL1),ncbi_101105592(Jph2),ncbi_101105713(PLK1),ncbi_1…
GO:0050789	regulation of biological process	111	87	MSTRG.14833(IGHA2),MSTRG.15496(--),MSTRG.19184(GBP2),MSTRG.8153(EEF2),ncbi_100034669(TAC1),ncbi_100125623(PER3),ncbi_100137067(FABP4),ncbi_100142676(FBXO32),ncbi_100147780(SLC25A33),ncbi_100217400(BTG1),ncbi_100302075(Rasd1),ncbi_100820742(GPX1),ncbi_101102194(IFIT1),ncbi_101102276(PMF1),ncbi_101102533(SH2D4A),ncbi_101102930(Trim23),ncbi_101103279(GLMP),ncbi_101103510(FANCI),ncbi_101103683(IRF7),…	MSTRG.5042(Ralbp1),ncbi_100125616(TNMD),ncbi_100135448(ARNT2),ncbi_100302744(Cib2),ncbi_100307048(SPARC),ncbi_101102903(ADAMTS3),ncbi_101103410(Hes5),ncbi_101103501(Grik5),ncbi_101103656(JMJD6),ncbi_101103679(PKHD1),ncbi_101103800(ROCK2),ncbi_101104142(IKZF4),ncbi_101104393(SREBF2),ncbi_101104991(FBN2),ncbi_101105292(CASQ2),ncbi_101105585(RAPGEFL1),ncbi_101105592(Jph2),ncbi_101105713(PLK1),ncbi_1…
GO:0003824	catalytic activity	93	57	MSTRG.15496(--),MSTRG.19184(GBP2),MSTRG.8153(EEF2),ncbi_100169699(LIPE),ncbi_100820742(GPX1),ncbi_101102070(DPYS),ncbi_101102930(Trim23),ncbi_101103503(AMPD3),ncbi_101103817(DPH6),ncbi_101104407(ACOT2),ncbi_101104842(FMO2),ncbi_101105089(FMO1),ncbi_101105114(CYP4B1),ncbi_101105177(TGM3),ncbi_101105627(PBLD),ncbi_101106412(ASL),ncbi_101106449(PCMTD2),ncbi_101106565(ADAMTS4),ncbi_101106773(CDKL2),n…	MSTRG.4689(MGST1),MSTRG.5042(Ralbp1),ncbi_100037690(PCK1),ncbi_100125351(SQLE),ncbi_100144429(MCT7),ncbi_100170113(CYP1A1),ncbi_101102324(METTL18),ncbi_101102903(ADAMTS3),ncbi_101103031(AK4),ncbi_101103656(JMJD6),ncbi_101103800(ROCK2),ncbi_101103861(CPXM2),ncbi_101104596(PTPRT),ncbi_101104856(P4HA3),ncbi_101105713(PLK1),ncbi_101105907(DPP6),ncbi_101106599(RIDA),ncbi_101106995(LSS),ncbi_101107315(…
GO:0001071	nucleic acid binding transcription factor activity	17	12	ncbi_101103279(GLMP),ncbi_101103683(IRF7),ncbi_101105489(PAX8),ncbi_101105544(Tgif1),ncbi_101108688(CREBRF),ncbi_101111234(IRF4),ncbi_101111414(SMAD7),ncbi_101112041(MEIS1),ncbi_101114494(NR4A2),ncbi_101117101(FOSB),ncbi_101119104(RORC),ncbi_101119560(PITX1),ncbi_101120892(HMGB2),ncbi_443218(FOS),ncbi_443419(STAT5A),ncbi_443447(MYC),ncbi_443457(PPARA)	ncbi_100135448(ARNT2),ncbi_101103410(Hes5),ncbi_101104393(SREBF2),ncbi_101105814(MYCN),ncbi_101106132(Sox8),ncbi_101109328(SIM2),ncbi_101113882(CREB3L1),ncbi_101113931(NR2F6),ncbi_101123434(Foxo6),ncbi_106991336(Mafa),ncbi_106991578(MAF),ncbi_443262(ARNTL)
GO:0005488	binding	146	119	MSTRG.14833(IGHA2),MSTRG.15496(--),MSTRG.19184(GBP2),MSTRG.8153(EEF2),ncbi_100034669(TAC1),ncbi_100125623(PER3),ncbi_100126573(TES),ncbi_100127218(AHSP),ncbi_100137067(FABP4),ncbi_100169699(LIPE),ncbi_100217400(BTG1),ncbi_100302075(Rasd1),ncbi_100913152(HSPA1B),ncbi_101102070(DPYS),ncbi_101102223(H1F0),ncbi_101102276(PMF1),ncbi_101102533(SH2D4A),ncbi_101102930(Trim23),ncbi_101103279(GLMP),ncbi_10…	MSTRG.16891(CCT6A),MSTRG.4689(MGST1),MSTRG.5042(Ralbp1),ncbi_100037690(PCK1),ncbi_100125351(SQLE),ncbi_100135448(ARNT2),ncbi_100170113(CYP1A1),ncbi_100302744(Cib2),ncbi_100307048(SPARC),ncbi_101102903(ADAMTS3),ncbi_101103031(AK4),ncbi_101103410(Hes5),ncbi_101103609(Npm3),ncbi_101103656(JMJD6),ncbi_101103800(ROCK2),ncbi_101103837(ABTB2),ncbi_101103861(CPXM2),ncbi_101104118(NPTX2),ncbi_101104142(IK…
GO:0016209	antioxidant activity	1	2	ncbi_100820742(GPX1)	MSTRG.4689(MGST1),ncbi_101110596(GPX2)
GO:0045182	translation regulator activity	2	0	MSTRG.8153(EEF2),ncbi_101117758(CIRBP)	--
GO:0000988	transcription factor activity, protein binding	6	4	ncbi_101102276(PMF1),ncbi_101103279(GLMP),ncbi_101119560(PITX1),ncbi_101122936(CALCOCO1),ncbi_101123584(CCDC62),ncbi_443457(PPARA)	ncbi_101109404(USP16),ncbi_101109515(CITED1),ncbi_101118525(TLE2),ncbi_443262(ARNTL)
GO:0005198	structural molecule activity	2	6	ncbi_101107597(RPL10A),ncbi_114110327(RPL12)	ncbi_101107864(COMP),ncbi_101109291(PKP1),ncbi_101116356(COL11A2),ncbi_101117548(COL11A1),ncbi_101120326(TUBA1B),ncbi_105601845(RPL10)
GO:0098772	molecular function regulator	5	11	ncbi_101107124(CCNE1),ncbi_101114193(RASGEF1B),ncbi_101116189(BCCIP),ncbi_101119037(MAPK8IP2),ncbi_654403(TXNIP)	MSTRG.5042(Ralbp1),ncbi_101105907(DPP6),ncbi_101108412(MATN4),ncbi_101109187(PI15),ncbi_101112873(NOXO1),ncbi_101113622(SCN4B),ncbi_101118902(DYNLL1),ncbi_101119226(LYNX1),ncbi_101120047(RASGEF1A),ncbi_101123648(ARHGAP23),ncbi_105614854(calm)
GO:0005215	transporter activity	5	12	ncbi_100147780(SLC25A33),ncbi_101108488(SLC39A8),ncbi_101110084(TRPM4),ncbi_101116241(GJC1),ncbi_101122774(CACNA1B)	MSTRG.16891(CCT6A),ncbi_101103501(Grik5),ncbi_101105033(SLC6A6),ncbi_101105592(Jph2),ncbi_101112110(Ttyh3),ncbi_101113622(SCN4B),ncbi_101118297(SLC7A10),ncbi_101118547(SLC2A10),ncbi_101123388(KCNJ12),ncbi_101123431(ABCC5),ncbi_114108606(SLC2A5),ncbi_654334(SLCO2A1)
GO:0060089	molecular transducer activity	12	18	MSTRG.14833(IGHA2),MSTRG.15496(--),ncbi_100125623(PER3),ncbi_101106266(F2RL1),ncbi_101111722(CXCL16),ncbi_101114494(NR4A2),ncbi_101114623(CYSLTR2),ncbi_101119104(RORC),ncbi_101119307(CFI),ncbi_114113806(IL4R),ncbi_443419(STAT5A),ncbi_443457(PPARA)	ncbi_100135448(ARNT2),ncbi_101103501(Grik5),ncbi_101103656(JMJD6),ncbi_101106801(PLXND1),ncbi_101109291(PKP1),ncbi_101109328(SIM2),ncbi_101111639(CNR1),ncbi_101113016(CX3CR1),ncbi_101113579(CALCR),ncbi_101113931(NR2F6),ncbi_101116611(PLXNA1),ncbi_101117815(SH2B2),ncbi_101121464(ADGRF1),ncbi_101122042(Gpr153),ncbi_101122928(EPHB2),ncbi_114118433(P2ry2),ncbi_443262(ARNTL),ncbi_443535(LDLR)
GO:0004871	signal transducer activity	8	10	MSTRG.14833(IGHA2),ncbi_101106266(F2RL1),ncbi_101111414(SMAD7),ncbi_101114494(NR4A2),ncbi_101114623(CYSLTR2),ncbi_101119104(RORC),ncbi_114113806(IL4R),ncbi_443457(PPARA)	ncbi_101106801(PLXND1),ncbi_101111639(CNR1),ncbi_101113016(CX3CR1),ncbi_101113579(CALCR),ncbi_101113931(NR2F6),ncbi_101116611(PLXNA1),ncbi_101121464(ADGRF1),ncbi_101122042(Gpr153),ncbi_101122928(EPHB2),ncbi_114118433(P2ry2)
GO:0005576	extracellular region	13	18	MSTRG.14833(IGHA2),MSTRG.15496(--),ncbi_100034669(TAC1),ncbi_101106565(ADAMTS4),ncbi_101107254(PCNT),ncbi_101108502(ALDH3A1),ncbi_101111722(CXCL16),ncbi_101112949(STC1),ncbi_101115290(CCL16),ncbi_101119307(CFI),ncbi_101120892(HMGB2),ncbi_101121925(ADA2),ncbi_101123419(C4A)	ncbi_100302744(Cib2),ncbi_100307048(SPARC),ncbi_101102903(ADAMTS3),ncbi_101103861(CPXM2),ncbi_101107315(TDP2),ncbi_101107864(COMP),ncbi_101111037(FMOD),ncbi_101112844(HSPA8),ncbi_101116995(RSPO3),ncbi_101118525(TLE2),ncbi_101118982(SPON1),ncbi_106990107(TPT1),ncbi_114113960(ERFE),ncbi_114114097(CRELD2),ncbi_114114906(CALR),ncbi_443058(SPP1),ncbi_443534(LEP),ncbi_443535(LDLR)
GO:0031012	extracellular matrix	1	9	ncbi_101106565(ADAMTS4)	ncbi_100307048(SPARC),ncbi_101102903(ADAMTS3),ncbi_101104991(FBN2),ncbi_101107864(COMP),ncbi_101109808(COL12A1),ncbi_101111037(FMOD),ncbi_101116356(COL11A2),ncbi_101117548(COL11A1),ncbi_101120031(ADAMTS8)
GO:0044421	extracellular region part	12	17	MSTRG.14833(IGHA2),ncbi_100034669(TAC1),ncbi_101106565(ADAMTS4),ncbi_101107254(PCNT),ncbi_101108502(ALDH3A1),ncbi_101111722(CXCL16),ncbi_101112949(STC1),ncbi_101115290(CCL16),ncbi_101119307(CFI),ncbi_101120892(HMGB2),ncbi_101121925(ADA2),ncbi_101123419(C4A)	ncbi_100302744(Cib2),ncbi_100307048(SPARC),ncbi_101102903(ADAMTS3),ncbi_101103861(CPXM2),ncbi_101107315(TDP2),ncbi_101107864(COMP),ncbi_101111037(FMOD),ncbi_101112844(HSPA8),ncbi_101118525(TLE2),ncbi_101118982(SPON1),ncbi_106990107(TPT1),ncbi_114113960(ERFE),ncbi_114114097(CRELD2),ncbi_114114906(CALR),ncbi_443058(SPP1),ncbi_443534(LEP),ncbi_443535(LDLR)
GO:0043226	organelle	144	108	MSTRG.14833(IGHA2),MSTRG.19184(GBP2),MSTRG.8153(EEF2),ncbi_100125354(PLIN2),ncbi_100126573(TES),ncbi_100137067(FABP4),ncbi_100142676(FBXO32),ncbi_100147780(SLC25A33),ncbi_100169699(LIPE),ncbi_100217400(BTG1),ncbi_101102070(DPYS),ncbi_101102223(H1F0),ncbi_101102276(PMF1),ncbi_101102930(Trim23),ncbi_101103279(GLMP),ncbi_101103655(XAF1),ncbi_101104499(FBXL4),ncbi_101104842(FMO2),ncbi_101104932(UCP2)…	MSTRG.16891(CCT6A),MSTRG.4689(MGST1),ncbi_100037690(PCK1),ncbi_100135448(ARNT2),ncbi_100147785(SLC25A15),ncbi_100170113(CYP1A1),ncbi_100307048(SPARC),ncbi_101102903(ADAMTS3),ncbi_101103031(AK4),ncbi_101103410(Hes5),ncbi_101103501(Grik5),ncbi_101103609(Npm3),ncbi_101103656(JMJD6),ncbi_101103679(PKHD1),ncbi_101103800(ROCK2),ncbi_101104393(SREBF2),ncbi_101104856(P4HA3),ncbi_101105292(CASQ2),ncbi_101…
GO:0099512	supramolecular fiber	2	4	ncbi_101123478(HID1),ncbi_105606262(DCXR)	ncbi_101113081(MTUS2),ncbi_101113319(Krt80),ncbi_101120243(LMNB2),ncbi_101120326(TUBA1B)
GO:0044215	other organism	1	0	MSTRG.19184(GBP2)	--
GO:0044217	other organism part	1	0	MSTRG.19184(GBP2)	--
GO:0005623	cell	158	116	MSTRG.14833(IGHA2),MSTRG.19184(GBP2),MSTRG.8153(EEF2),ncbi_100034669(TAC1),ncbi_100125354(PLIN2),ncbi_100126573(TES),ncbi_100127218(AHSP),ncbi_100137067(FABP4),ncbi_100142676(FBXO32),ncbi_100147780(SLC25A33),ncbi_100169699(LIPE),ncbi_100217400(BTG1),ncbi_100820742(GPX1),ncbi_101101923(SEC14L4),ncbi_101102070(DPYS),ncbi_101102194(IFIT1),ncbi_101102223(H1F0),ncbi_101102276(PMF1),ncbi_101102930(Trim…	MSTRG.16891(CCT6A),MSTRG.4689(MGST1),MSTRG.5042(Ralbp1),ncbi_100135448(ARNT2),ncbi_100147785(SLC25A15),ncbi_100170113(CYP1A1),ncbi_100302744(Cib2),ncbi_100307048(SPARC),ncbi_101103031(AK4),ncbi_101103410(Hes5),ncbi_101103501(Grik5),ncbi_101103609(Npm3),ncbi_101103656(JMJD6),ncbi_101103679(PKHD1),ncbi_101103800(ROCK2),ncbi_101104393(SREBF2),ncbi_101104856(P4HA3),ncbi_101105292(CASQ2),ncbi_10110559…
GO:0044464	cell part	158	116	MSTRG.14833(IGHA2),MSTRG.19184(GBP2),MSTRG.8153(EEF2),ncbi_100034669(TAC1),ncbi_100125354(PLIN2),ncbi_100126573(TES),ncbi_100127218(AHSP),ncbi_100137067(FABP4),ncbi_100142676(FBXO32),ncbi_100147780(SLC25A33),ncbi_100169699(LIPE),ncbi_100217400(BTG1),ncbi_100820742(GPX1),ncbi_101101923(SEC14L4),ncbi_101102070(DPYS),ncbi_101102194(IFIT1),ncbi_101102223(H1F0),ncbi_101102276(PMF1),ncbi_101102930(Trim…	MSTRG.16891(CCT6A),MSTRG.4689(MGST1),MSTRG.5042(Ralbp1),ncbi_100135448(ARNT2),ncbi_100147785(SLC25A15),ncbi_100170113(CYP1A1),ncbi_100302744(Cib2),ncbi_100307048(SPARC),ncbi_101103031(AK4),ncbi_101103410(Hes5),ncbi_101103501(Grik5),ncbi_101103609(Npm3),ncbi_101103656(JMJD6),ncbi_101103679(PKHD1),ncbi_101103800(ROCK2),ncbi_101104393(SREBF2),ncbi_101104856(P4HA3),ncbi_101105292(CASQ2),ncbi_10110559…
GO:0030054	cell junction	6	10	ncbi_100126573(TES),ncbi_101107257(DDX58),ncbi_101107597(RPL10A),ncbi_101111414(SMAD7),ncbi_101116241(GJC1),ncbi_114110327(RPL12)	ncbi_100302744(Cib2),ncbi_101105550(COL13A1),ncbi_101106077(PCDH12),ncbi_101106263(SHROOM3),ncbi_101109291(PKP1),ncbi_101112844(HSPA8),ncbi_101113622(SCN4B),ncbi_101118347(FBLN7),ncbi_105616540(KAZN),ncbi_114114906(CALR)
GO:0016020	membrane	77	73	MSTRG.14833(IGHA2),MSTRG.15496(--),MSTRG.19184(GBP2),MSTRG.8153(EEF2),ncbi_100034669(TAC1),ncbi_100125354(PLIN2),ncbi_100147780(SLC25A33),ncbi_100169699(LIPE),ncbi_101101923(SEC14L4),ncbi_101102930(Trim23),ncbi_101103279(GLMP),ncbi_101104842(FMO2),ncbi_101104932(UCP2),ncbi_101105089(FMO1),ncbi_101105155(BTNL9),ncbi_101105177(TGM3),ncbi_101105594(CCDC155),ncbi_101105854(VPS33B),ncbi_101105979(GCA)…	MSTRG.4689(MGST1),ncbi_100125351(SQLE),ncbi_100147785(SLC25A15),ncbi_100170113(CYP1A1),ncbi_100302744(Cib2),ncbi_100307048(SPARC),ncbi_101103501(Grik5),ncbi_101103656(JMJD6),ncbi_101103679(PKHD1),ncbi_101105011(TEX2),ncbi_101105033(SLC6A6),ncbi_101105592(Jph2),ncbi_101105818(SLC25A41),ncbi_101105907(DPP6),ncbi_101106077(PCDH12),ncbi_101106263(SHROOM3),ncbi_101106801(PLXND1),ncbi_101106898(POPDC2)…
GO:0045202	synapse	1	4	ncbi_101119037(MAPK8IP2)	ncbi_100302744(Cib2),ncbi_101103501(Grik5),ncbi_101110839(KCTD16),ncbi_101122119(PCDH8)
GO:0031974	membrane-enclosed lumen	15	12	ncbi_101102223(H1F0),ncbi_101104499(FBXL4),ncbi_101105489(PAX8),ncbi_101105594(CCDC155),ncbi_101108688(CREBRF),ncbi_101109397(HIST1H1D),ncbi_101111414(SMAD7),ncbi_101112835(LIN9),ncbi_101113893(HIST1H1D),ncbi_101114494(NR4A2),ncbi_101115990(SETD7),ncbi_101120209(UBE2D1),ncbi_101120892(HMGB2),ncbi_114118469(NCAPD3),ncbi_443447(MYC)	ncbi_100307048(SPARC),ncbi_101103656(JMJD6),ncbi_101105292(CASQ2),ncbi_101107315(TDP2),ncbi_101109291(PKP1),ncbi_101116417(SUV39H2),ncbi_101118525(TLE2),ncbi_101120039(DPH3),ncbi_106990107(TPT1),ncbi_114113917(METTL14),ncbi_114114906(CALR),ncbi_443262(ARNTL)
GO:0044422	organelle part	54	46	MSTRG.19184(GBP2),ncbi_100142676(FBXO32),ncbi_100147780(SLC25A33),ncbi_101102223(H1F0),ncbi_101102276(PMF1),ncbi_101102930(Trim23),ncbi_101103279(GLMP),ncbi_101104499(FBXL4),ncbi_101104842(FMO2),ncbi_101104932(UCP2),ncbi_101105089(FMO1),ncbi_101105489(PAX8),ncbi_101105594(CCDC155),ncbi_101105854(VPS33B),ncbi_101106227(SPTSSA),ncbi_101106812(ST3GAL6),ncbi_101107254(PCNT),ncbi_101107260(PRODH),ncbi…	MSTRG.4689(MGST1),ncbi_100147785(SLC25A15),ncbi_100170113(CYP1A1),ncbi_100307048(SPARC),ncbi_101103031(AK4),ncbi_101103656(JMJD6),ncbi_101103679(PKHD1),ncbi_101103800(ROCK2),ncbi_101104856(P4HA3),ncbi_101105292(CASQ2),ncbi_101105592(Jph2),ncbi_101105595(SDHAF1),ncbi_101105713(PLK1),ncbi_101106995(LSS),ncbi_101107315(TDP2),ncbi_101108953(PDE4D),ncbi_101109032(--),ncbi_101109291(PKP1),ncbi_10111026…
GO:0044456	synapse part	1	2	ncbi_101119037(MAPK8IP2)	ncbi_101110839(KCTD16),ncbi_101122119(PCDH8)
GO:0044420	extracellular matrix component	0	1	--	ncbi_100307048(SPARC)
GO:0044425	membrane part	48	56	MSTRG.14833(IGHA2),MSTRG.15496(--),ncbi_100147780(SLC25A33),ncbi_100169699(LIPE),ncbi_101101923(SEC14L4),ncbi_101103279(GLMP),ncbi_101104842(FMO2),ncbi_101104932(UCP2),ncbi_101105089(FMO1),ncbi_101105155(BTNL9),ncbi_101105177(TGM3),ncbi_101106227(SPTSSA),ncbi_101106266(F2RL1),ncbi_101106812(ST3GAL6),ncbi_101106828(IFI6),ncbi_101107257(DDX58),ncbi_101110084(TRPM4),ncbi_101110257(SPTLC3),ncbi_10111…	MSTRG.4689(MGST1),ncbi_100125351(SQLE),ncbi_100147785(SLC25A15),ncbi_101103501(Grik5),ncbi_101105011(TEX2),ncbi_101105033(SLC6A6),ncbi_101105592(Jph2),ncbi_101105818(SLC25A41),ncbi_101105907(DPP6),ncbi_101106077(PCDH12),ncbi_101106801(PLXND1),ncbi_101106898(POPDC2),ncbi_101107547(Cadm4),ncbi_101108614(TENM4),ncbi_101108953(PDE4D),ncbi_101109586(GALNT17),ncbi_101110839(KCTD16),ncbi_101111639(CNR1)…
GO:0032991	macromolecular complex	42	27	MSTRG.14833(IGHA2),MSTRG.8153(EEF2),ncbi_100126573(TES),ncbi_101102223(H1F0),ncbi_101102276(PMF1),ncbi_101105489(PAX8),ncbi_101105854(VPS33B),ncbi_101106227(SPTSSA),ncbi_101107124(CCNE1),ncbi_101107597(RPL10A),ncbi_101109397(HIST1H1D),ncbi_101110257(SPTLC3),ncbi_101111234(IRF4),ncbi_101111322(CRBN),ncbi_101111414(SMAD7),ncbi_101112041(MEIS1),ncbi_101112630(ZBTB8OS),ncbi_101112835(LIN9),ncbi_10111…	MSTRG.16891(CCT6A),ncbi_100135448(ARNT2),ncbi_101103800(ROCK2),ncbi_101104393(SREBF2),ncbi_101105713(PLK1),ncbi_101105907(DPP6),ncbi_101106132(Sox8),ncbi_101108953(PDE4D),ncbi_101109291(PKP1),ncbi_101110262(Dpf1),ncbi_101110839(KCTD16),ncbi_101112110(Ttyh3),ncbi_101112844(HSPA8),ncbi_101114379(NDUFA5),ncbi_101114701(Olfm2),ncbi_101116417(SUV39H2),ncbi_101118902(DYNLL1),ncbi_101119787(RET),ncbi_10…

## Sheet: 1.5 y vs 3.5 y
Significant results of GO results in the 1.5 y vs 3.5 y
GO ID (level2)	GO Term (level2)	number_of_B-vs-C (up)	number_of_B-vs-C (down)	Genes_of_B-vs-C_up	Genes_of_B-vs-C_down
GO:0048511	rhythmic process	2	2	ncbi_101116417(SUV39H2),ncbi_443262(ARNTL)	ncbi_100125623(PER3),ncbi_101111650(ID1)
GO:0002376	immune system process	4	13	ncbi_101111848(ADIPOQ),ncbi_101118514(BoLA-DQB),ncbi_101120392(BoLA-DQB),ncbi_114116088(RAET1G)	ncbi_101102194(IFIT1),ncbi_101103683(IRF7),ncbi_101109915(OAS2),ncbi_101111234(IRF4),ncbi_101122711(RGS1),ncbi_105602911(OAS1),ncbi_114108725(ULBP1),ncbi_114113811(ABCC9),ncbi_443005(GAPDH),ncbi_443268(AQP4),ncbi_443483(COL1A1),ncbi_494547(TLR9),ncbi_780441(MX2)
GO:0050896	response to stimulus	19	35	MSTRG.4689(MGST1),ncbi_100037663(Gstm5),ncbi_100642179(SLC22A3),ncbi_101104483(PRKAG2),ncbi_101106877(CHRDL2),ncbi_101107315(TDP2),ncbi_101109022(ESRRB),ncbi_101109707(KLB),ncbi_101109910(STC2),ncbi_101111848(ADIPOQ),ncbi_101112723(TIGAR),ncbi_101116995(RSPO3),ncbi_101119218(CILP),ncbi_101119747(CDH1),ncbi_101121828(ZNF385B),ncbi_101122635(ABHD6),ncbi_106990107(TPT1),ncbi_114116628(SETD7),ncbi_44…	MSTRG.15496(--),ncbi_100125623(PER3),ncbi_100302636(KLF4),ncbi_101102194(IFIT1),ncbi_101103462(MGST1),ncbi_101103683(IRF7),ncbi_101104473(RND1),ncbi_101105600(RNF169),ncbi_101106828(IFI6),ncbi_101107064(HSPA6),ncbi_101107094(ARRDC3),ncbi_101109915(OAS2),ncbi_101111234(IRF4),ncbi_101111650(ID1),ncbi_101111972(DUOX1),ncbi_101112196(RAPGEF4),ncbi_101112518(CSRNP1),ncbi_101112990(ITGBL1),ncbi_1011158…
GO:0022610	biological adhesion	2	8	ncbi_101111848(ADIPOQ),ncbi_101119747(CDH1)	ncbi_100302636(KLF4),ncbi_101104473(RND1),ncbi_101111234(IRF4),ncbi_101112990(ITGBL1),ncbi_101113636(VCAM1),ncbi_101118069(CDH20),ncbi_443483(COL1A1),ncbi_780477(CLDN4)
GO:0032502	developmental process	19	15	MSTRG.4689(MGST1),ncbi_101106263(SHROOM3),ncbi_101106877(CHRDL2),ncbi_101108379(HOXC11),ncbi_101109022(ESRRB),ncbi_101109910(STC2),ncbi_101110430(CCDC40),ncbi_101111848(ADIPOQ),ncbi_101111989(PIGT),ncbi_101112723(TIGAR),ncbi_101115910(BTBD7),ncbi_101116417(SUV39H2),ncbi_101116995(RSPO3),ncbi_101118378(IRX5),ncbi_101119747(CDH1),ncbi_105608393(VAMP3),ncbi_106990107(TPT1),ncbi_106991578(MAF),ncbi_4…	MSTRG.15496(--),ncbi_100302636(KLF4),ncbi_101104473(RND1),ncbi_101107094(ARRDC3),ncbi_101111234(IRF4),ncbi_101111650(ID1),ncbi_101111972(DUOX1),ncbi_101112518(CSRNP1),ncbi_101112949(STC1),ncbi_101120619(TH),ncbi_105616722(SOX18),ncbi_114109001(NGRN),ncbi_114109131(INSIG2),ncbi_443135(PTHLH),ncbi_443483(COL1A1)
GO:0040011	locomotion	5	6	ncbi_101111848(ADIPOQ),ncbi_101119747(CDH1),ncbi_101120047(RASGEF1A),ncbi_101122152(NANOS1),ncbi_101122635(ABHD6)	MSTRG.15496(--),ncbi_100302636(KLF4),ncbi_101107094(ARRDC3),ncbi_101112949(STC1),ncbi_105616722(SOX18),ncbi_443483(COL1A1)
GO:0023052	signaling	15	21	ncbi_101104483(PRKAG2),ncbi_101106877(CHRDL2),ncbi_101109022(ESRRB),ncbi_101109405(STXBP5L),ncbi_101109707(KLB),ncbi_101109910(STC2),ncbi_101111848(ADIPOQ),ncbi_101116995(RSPO3),ncbi_101119218(CILP),ncbi_101119747(CDH1),ncbi_101121828(ZNF385B),ncbi_101122635(ABHD6),ncbi_105608393(VAMP3),ncbi_106990107(TPT1),ncbi_443262(ARNTL)	MSTRG.15496(--),ncbi_101103683(IRF7),ncbi_101104473(RND1),ncbi_101106828(IFI6),ncbi_101107094(ARRDC3),ncbi_101111650(ID1),ncbi_101111972(DUOX1),ncbi_101112196(RAPGEF4),ncbi_101112518(CSRNP1),ncbi_101112990(ITGBL1),ncbi_101115838(GNG12),ncbi_101118624(F10),ncbi_101120619(TH),ncbi_101121275(NKIRAS2),ncbi_101122202(C1QTNF1),ncbi_101122711(RGS1),ncbi_114109131(INSIG2),ncbi_114116943(LRIG2),ncbi_44313…
GO:0051704	multi-organism process	4	8	MSTRG.4689(MGST1),ncbi_106990107(TPT1),ncbi_114113983(Rps23),ncbi_443262(ARNTL)	ncbi_101102194(IFIT1),ncbi_101109915(OAS2),ncbi_101111234(IRF4),ncbi_101120619(TH),ncbi_105602911(OAS1),ncbi_114110327(RPL12),ncbi_494547(TLR9),ncbi_780441(MX2)
GO:0048519	negative regulation of biological process	6	13	ncbi_101104483(PRKAG2),ncbi_101111848(ADIPOQ),ncbi_101112723(TIGAR),ncbi_101119218(CILP),ncbi_101119747(CDH1),ncbi_443262(ARNTL)	MSTRG.15496(--),ncbi_100302636(KLF4),ncbi_100316848(B4GALT7),ncbi_101102194(IFIT1),ncbi_101106828(IFI6),ncbi_101107094(ARRDC3),ncbi_101111234(IRF4),ncbi_101112949(STC1),ncbi_101122202(C1QTNF1),ncbi_101122711(RGS1),ncbi_114109131(INSIG2),ncbi_443483(COL1A1),ncbi_494547(TLR9)
GO:0044699	single-organism process	38	48	MSTRG.4689(MGST1),ncbi_100642179(SLC22A3),ncbi_101104483(PRKAG2),ncbi_101106263(SHROOM3),ncbi_101106877(CHRDL2),ncbi_101107315(TDP2),ncbi_101108379(HOXC11),ncbi_101108736(PLBD1),ncbi_101109022(ESRRB),ncbi_101109366(SYNJ2),ncbi_101109405(STXBP5L),ncbi_101109565(SLC28A1),ncbi_101109707(KLB),ncbi_101109910(STC2),ncbi_101110430(CCDC40),ncbi_101111848(ADIPOQ),ncbi_101111989(PIGT),ncbi_101112723(TIGAR)…	MSTRG.15496(--),ncbi_100302636(KLF4),ncbi_100316848(B4GALT7),ncbi_101103462(MGST1),ncbi_101103683(IRF7),ncbi_101104473(RND1),ncbi_101105600(RNF169),ncbi_101106828(IFI6),ncbi_101107094(ARRDC3),ncbi_101109915(OAS2),ncbi_101111234(IRF4),ncbi_101111650(ID1),ncbi_101111869(DPYSL5),ncbi_101111972(DUOX1),ncbi_101112196(RAPGEF4),ncbi_101112518(CSRNP1),ncbi_101112949(STC1),ncbi_101112990(ITGBL1),ncbi_1011…
GO:0022414	reproductive process	6	1	MSTRG.4689(MGST1),ncbi_101109022(ESRRB),ncbi_101116417(SUV39H2),ncbi_101116995(RSPO3),ncbi_101118378(IRX5),ncbi_443262(ARNTL)	ncbi_101120619(TH)
GO:0000003	reproduction	6	1	MSTRG.4689(MGST1),ncbi_101109022(ESRRB),ncbi_101116417(SUV39H2),ncbi_101116995(RSPO3),ncbi_101118378(IRX5),ncbi_443262(ARNTL)	ncbi_101120619(TH)
GO:0008152	metabolic process	34	37	MSTRG.4689(MGST1),ncbi_100037663(Gstm5),ncbi_100642179(SLC22A3),ncbi_101102541(RPL6),ncbi_101104461(LONRF3),ncbi_101104483(PRKAG2),ncbi_101106877(CHRDL2),ncbi_101107315(TDP2),ncbi_101108379(HOXC11),ncbi_101108736(PLBD1),ncbi_101109022(ESRRB),ncbi_101109366(SYNJ2),ncbi_101109707(KLB),ncbi_101109910(STC2),ncbi_101111848(ADIPOQ),ncbi_101111989(PIGT),ncbi_101112629(PTPN4),ncbi_101112723(TIGAR),ncbi_1…	MSTRG.15496(--),ncbi_100135440(RPL6),ncbi_100302636(KLF4),ncbi_100316848(B4GALT7),ncbi_101102194(IFIT1),ncbi_101103462(MGST1),ncbi_101103683(IRF7),ncbi_101105600(RNF169),ncbi_101107094(ARRDC3),ncbi_101109915(OAS2),ncbi_101111204(MRM1),ncbi_101111234(IRF4),ncbi_101111650(ID1),ncbi_101111869(DPYSL5),ncbi_101111972(DUOX1),ncbi_101112196(RAPGEF4),ncbi_101112518(CSRNP1),ncbi_101113485(MMP19),ncbi_1011…
GO:0040007	growth	2	3	ncbi_101109022(ESRRB),ncbi_101109910(STC2)	ncbi_101112949(STC1),ncbi_101122544(OSGIN1),ncbi_443135(PTHLH)
GO:0065007	biological regulation	28	40	ncbi_100642179(SLC22A3),ncbi_101104483(PRKAG2),ncbi_101106263(SHROOM3),ncbi_101106877(CHRDL2),ncbi_101108379(HOXC11),ncbi_101109022(ESRRB),ncbi_101109405(STXBP5L),ncbi_101109707(KLB),ncbi_101109910(STC2),ncbi_101110430(CCDC40),ncbi_101111848(ADIPOQ),ncbi_101112723(TIGAR),ncbi_101113354(RTN2),ncbi_101115910(BTBD7),ncbi_101116417(SUV39H2),ncbi_101116995(RSPO3),ncbi_101118378(IRX5),ncbi_101119218(CI…	MSTRG.15496(--),ncbi_100125623(PER3),ncbi_100302636(KLF4),ncbi_100316848(B4GALT7),ncbi_101102194(IFIT1),ncbi_101103683(IRF7),ncbi_101104473(RND1),ncbi_101106828(IFI6),ncbi_101107094(ARRDC3),ncbi_101111234(IRF4),ncbi_101111650(ID1),ncbi_101111972(DUOX1),ncbi_101112196(RAPGEF4),ncbi_101112518(CSRNP1),ncbi_101112949(STC1),ncbi_101112990(ITGBL1),ncbi_101115838(GNG12),ncbi_101118079(MYO3B),ncbi_101118…
GO:0051179	localization	17	14	ncbi_100642179(SLC22A3),ncbi_101104483(PRKAG2),ncbi_101109405(STXBP5L),ncbi_101109565(SLC28A1),ncbi_101109910(STC2),ncbi_101110430(CCDC40),ncbi_101111848(ADIPOQ),ncbi_101113354(RTN2),ncbi_101119747(CDH1),ncbi_101120047(RASGEF1A),ncbi_101121229(CLDN15),ncbi_101122152(NANOS1),ncbi_101122635(ABHD6),ncbi_105608393(VAMP3),ncbi_106990107(TPT1),ncbi_114113983(Rps23),ncbi_443262(ARNTL)	ncbi_100302636(KLF4),ncbi_101102194(IFIT1),ncbi_101112196(RAPGEF4),ncbi_101112949(STC1),ncbi_101116069(SLC16A6),ncbi_101120098(TTLL6),ncbi_101122202(C1QTNF1),ncbi_105616722(SOX18),ncbi_114110327(RPL12),ncbi_114113811(ABCC9),ncbi_114115272(MCUB),ncbi_443268(AQP4),ncbi_443483(COL1A1),ncbi_780441(MX2)
GO:0071840	cellular component organization or biogenesis	15	14	MSTRG.4689(MGST1),ncbi_101104483(PRKAG2),ncbi_101105335(TSPYL4),ncbi_101106263(SHROOM3),ncbi_101109022(ESRRB),ncbi_101110430(CCDC40),ncbi_101111848(ADIPOQ),ncbi_101114988(IGHMBP2),ncbi_101115715(CEP57L1),ncbi_101116417(SUV39H2),ncbi_101119747(CDH1),ncbi_105608393(VAMP3),ncbi_114113983(Rps23),ncbi_114116628(SETD7),ncbi_443186(ACACA)	ncbi_100316848(B4GALT7),ncbi_101103462(MGST1),ncbi_101104473(RND1),ncbi_101106828(IFI6),ncbi_101111234(IRF4),ncbi_101111650(ID1),ncbi_101118079(MYO3B),ncbi_101120098(TTLL6),ncbi_101120326(TUBA1B),ncbi_101122202(C1QTNF1),ncbi_101122544(OSGIN1),ncbi_105602911(OAS1),ncbi_114110327(RPL12),ncbi_443483(COL1A1)
GO:0050789	regulation of biological process	27	36	ncbi_100642179(SLC22A3),ncbi_101104483(PRKAG2),ncbi_101106263(SHROOM3),ncbi_101106877(CHRDL2),ncbi_101108379(HOXC11),ncbi_101109022(ESRRB),ncbi_101109405(STXBP5L),ncbi_101109707(KLB),ncbi_101109910(STC2),ncbi_101110430(CCDC40),ncbi_101111848(ADIPOQ),ncbi_101112723(TIGAR),ncbi_101113354(RTN2),ncbi_101115910(BTBD7),ncbi_101116417(SUV39H2),ncbi_101116995(RSPO3),ncbi_101118378(IRX5),ncbi_101119218(CI…	MSTRG.15496(--),ncbi_100125623(PER3),ncbi_100302636(KLF4),ncbi_100316848(B4GALT7),ncbi_101102194(IFIT1),ncbi_101103683(IRF7),ncbi_101104473(RND1),ncbi_101106828(IFI6),ncbi_101107094(ARRDC3),ncbi_101111234(IRF4),ncbi_101111650(ID1),ncbi_101111972(DUOX1),ncbi_101112196(RAPGEF4),ncbi_101112518(CSRNP1),ncbi_101112949(STC1),ncbi_101112990(ITGBL1),ncbi_101115838(GNG12),ncbi_101118079(MYO3B),ncbi_101118…
GO:0009987	cellular process	39	52	MSTRG.4689(MGST1),ncbi_100037663(Gstm5),ncbi_100642179(SLC22A3),ncbi_101104483(PRKAG2),ncbi_101105335(TSPYL4),ncbi_101106263(SHROOM3),ncbi_101106877(CHRDL2),ncbi_101107315(TDP2),ncbi_101108379(HOXC11),ncbi_101109022(ESRRB),ncbi_101109366(SYNJ2),ncbi_101109405(STXBP5L),ncbi_101109707(KLB),ncbi_101109910(STC2),ncbi_101110430(CCDC40),ncbi_101111848(ADIPOQ),ncbi_101111989(PIGT),ncbi_101112629(PTPN4),…	MSTRG.15496(--),ncbi_100125623(PER3),ncbi_100302636(KLF4),ncbi_100316848(B4GALT7),ncbi_101102194(IFIT1),ncbi_101103462(MGST1),ncbi_101103683(IRF7),ncbi_101104473(RND1),ncbi_101105600(RNF169),ncbi_101106828(IFI6),ncbi_101107064(HSPA6),ncbi_101107094(ARRDC3),ncbi_101109915(OAS2),ncbi_101111234(IRF4),ncbi_101111650(ID1),ncbi_101111869(DPYSL5),ncbi_101111972(DUOX1),ncbi_101112196(RAPGEF4),ncbi_101112…
GO:0032501	multicellular organismal process	12	22	ncbi_101106263(SHROOM3),ncbi_101108379(HOXC11),ncbi_101109022(ESRRB),ncbi_101109910(STC2),ncbi_101110430(CCDC40),ncbi_101111848(ADIPOQ),ncbi_101115910(BTBD7),ncbi_101118378(IRX5),ncbi_101119747(CDH1),ncbi_106990107(TPT1),ncbi_106991578(MAF),ncbi_443262(ARNTL)	MSTRG.15496(--),ncbi_100125623(PER3),ncbi_100302636(KLF4),ncbi_101103683(IRF7),ncbi_101104473(RND1),ncbi_101107094(ARRDC3),ncbi_101111234(IRF4),ncbi_101111650(ID1),ncbi_101111972(DUOX1),ncbi_101112518(CSRNP1),ncbi_101112949(STC1),ncbi_101120619(TH),ncbi_101122202(C1QTNF1),ncbi_105616722(SOX18),ncbi_114109001(NGRN),ncbi_114109131(INSIG2),ncbi_114116943(LRIG2),ncbi_443135(PTHLH),ncbi_443268(AQP4),n…
GO:0048518	positive regulation of biological process	5	10	ncbi_101104483(PRKAG2),ncbi_101111848(ADIPOQ),ncbi_101112723(TIGAR),ncbi_101119747(CDH1),ncbi_443262(ARNTL)	ncbi_100302636(KLF4),ncbi_101103683(IRF7),ncbi_101107094(ARRDC3),ncbi_101111234(IRF4),ncbi_101112949(STC1),ncbi_101118079(MYO3B),ncbi_101122202(C1QTNF1),ncbi_443135(PTHLH),ncbi_443483(COL1A1),ncbi_494547(TLR9)
GO:0007610	behavior	0	2	--	ncbi_100125623(PER3),ncbi_101120619(TH)
GO:0005488	binding	38	44	MSTRG.4689(MGST1),ncbi_100037663(Gstm5),ncbi_100642179(SLC22A3),ncbi_101102541(RPL6),ncbi_101104461(LONRF3),ncbi_101104483(PRKAG2),ncbi_101106263(SHROOM3),ncbi_101107315(TDP2),ncbi_101108379(HOXC11),ncbi_101109022(ESRRB),ncbi_101109366(SYNJ2),ncbi_101109405(STXBP5L),ncbi_101109707(KLB),ncbi_101109910(STC2),ncbi_101111848(ADIPOQ),ncbi_101111989(PIGT),ncbi_101112629(PTPN4),ncbi_101114988(IGHMBP2),n…	MSTRG.15496(--),ncbi_100125623(PER3),ncbi_100135440(RPL6),ncbi_100302636(KLF4),ncbi_100316848(B4GALT7),ncbi_101103683(IRF7),ncbi_101103811(FBN3),ncbi_101104473(RND1),ncbi_101105600(RNF169),ncbi_101105958(HMGN2),ncbi_101107064(HSPA6),ncbi_101107094(ARRDC3),ncbi_101109915(OAS2),ncbi_101111204(MRM1),ncbi_101111234(IRF4),ncbi_101111650(ID1),ncbi_101111972(DUOX1),ncbi_101112196(RAPGEF4),ncbi_101112518…
GO:0016209	antioxidant activity	1	1	MSTRG.4689(MGST1)	ncbi_101103462(MGST1)
GO:0001071	nucleic acid binding transcription factor activity	4	6	ncbi_101108379(HOXC11),ncbi_101109022(ESRRB),ncbi_106991578(MAF),ncbi_443262(ARNTL)	ncbi_100302636(KLF4),ncbi_101103683(IRF7),ncbi_101111234(IRF4),ncbi_101111650(ID1),ncbi_101112518(CSRNP1),ncbi_105616722(SOX18)
GO:0003824	catalytic activity	19	24	MSTRG.4689(MGST1),ncbi_100037663(Gstm5),ncbi_101104483(PRKAG2),ncbi_101107315(TDP2),ncbi_101108736(PLBD1),ncbi_101109366(SYNJ2),ncbi_101111989(PIGT),ncbi_101112629(PTPN4),ncbi_101112723(TIGAR),ncbi_101114988(IGHMBP2),ncbi_101116417(SUV39H2),ncbi_101117966(MMP17),ncbi_101118402(Plcxd2),ncbi_101120031(ADAMTS8),ncbi_101122635(ABHD6),ncbi_106990219(GSTM1),ncbi_114116628(SETD7),ncbi_114118760(UBE2QL1)…	MSTRG.15496(--),ncbi_100316848(B4GALT7),ncbi_101103462(MGST1),ncbi_101105600(RNF169),ncbi_101107064(HSPA6),ncbi_101109915(OAS2),ncbi_101111204(MRM1),ncbi_101111234(IRF4),ncbi_101111869(DPYSL5),ncbi_101111972(DUOX1),ncbi_101113485(MMP19),ncbi_101118079(MYO3B),ncbi_101118624(F10),ncbi_101120326(TUBA1B),ncbi_101120619(TH),ncbi_101121723(FOLH1),ncbi_101123247(PIK3R3),ncbi_105602911(OAS1),ncbi_1056039…
GO:0005198	structural molecule activity	0	3	--	ncbi_101120326(TUBA1B),ncbi_114110327(RPL12),ncbi_443483(COL1A1)
GO:0098772	molecular function regulator	2	3	ncbi_101104483(PRKAG2),ncbi_101120047(RASGEF1A)	ncbi_101112196(RAPGEF4),ncbi_101123247(PIK3R3),ncbi_114115272(MCUB)
GO:0000988	transcription factor activity, protein binding	2	1	ncbi_101109022(ESRRB),ncbi_443262(ARNTL)	ncbi_100302636(KLF4)
GO:0005215	transporter activity	2	2	ncbi_100642179(SLC22A3),ncbi_101109565(SLC28A1)	ncbi_114113811(ABCC9),ncbi_443268(AQP4)
GO:0060089	molecular transducer activity	2	4	ncbi_101109022(ESRRB),ncbi_443262(ARNTL)	MSTRG.15496(--),ncbi_100125623(PER3),ncbi_114113811(ABCC9),ncbi_494547(TLR9)
GO:0004871	signal transducer activity	1	2	ncbi_101109022(ESRRB)	ncbi_114113811(ABCC9),ncbi_494547(TLR9)
GO:0005576	extracellular region	6	5	ncbi_101104483(PRKAG2),ncbi_101107315(TDP2),ncbi_101109910(STC2),ncbi_101111848(ADIPOQ),ncbi_101116995(RSPO3),ncbi_106990107(TPT1)	MSTRG.15496(--),ncbi_101107064(HSPA6),ncbi_101112949(STC1),ncbi_101122202(C1QTNF1),ncbi_443483(COL1A1)
GO:0030054	cell junction	4	5	ncbi_101102541(RPL6),ncbi_101106263(SHROOM3),ncbi_101119747(CDH1),ncbi_101121229(CLDN15)	ncbi_100135440(RPL6),ncbi_101104473(RND1),ncbi_114110327(RPL12),ncbi_443268(AQP4),ncbi_780477(CLDN4)
GO:0005623	cell	40	42	MSTRG.4689(MGST1),ncbi_100037663(Gstm5),ncbi_101102541(RPL6),ncbi_101104483(PRKAG2),ncbi_101106263(SHROOM3),ncbi_101107315(TDP2),ncbi_101108379(HOXC11),ncbi_101108411(Echdc3),ncbi_101109022(ESRRB),ncbi_101109405(STXBP5L),ncbi_101109910(STC2),ncbi_101110430(CCDC40),ncbi_101111848(ADIPOQ),ncbi_101111989(PIGT),ncbi_101112629(PTPN4),ncbi_101112723(TIGAR),ncbi_101113354(RTN2),ncbi_101114988(IGHMBP2),n…	ncbi_100135440(RPL6),ncbi_100302636(KLF4),ncbi_100316848(B4GALT7),ncbi_101102194(IFIT1),ncbi_101103462(MGST1),ncbi_101104473(RND1),ncbi_101105600(RNF169),ncbi_101105958(HMGN2),ncbi_101106828(IFI6),ncbi_101107064(HSPA6),ncbi_101107094(ARRDC3),ncbi_101108361(URB2),ncbi_101109915(OAS2),ncbi_101111204(MRM1),ncbi_101111234(IRF4),ncbi_101111305(TMEM63A),ncbi_101111650(ID1),ncbi_101111869(DPYSL5),ncbi_1…
GO:0044464	cell part	40	42	MSTRG.4689(MGST1),ncbi_100037663(Gstm5),ncbi_101102541(RPL6),ncbi_101104483(PRKAG2),ncbi_101106263(SHROOM3),ncbi_101107315(TDP2),ncbi_101108379(HOXC11),ncbi_101108411(Echdc3),ncbi_101109022(ESRRB),ncbi_101109405(STXBP5L),ncbi_101109910(STC2),ncbi_101110430(CCDC40),ncbi_101111848(ADIPOQ),ncbi_101111989(PIGT),ncbi_101112629(PTPN4),ncbi_101112723(TIGAR),ncbi_101113354(RTN2),ncbi_101114988(IGHMBP2),n…	ncbi_100135440(RPL6),ncbi_100302636(KLF4),ncbi_100316848(B4GALT7),ncbi_101102194(IFIT1),ncbi_101103462(MGST1),ncbi_101104473(RND1),ncbi_101105600(RNF169),ncbi_101105958(HMGN2),ncbi_101106828(IFI6),ncbi_101107064(HSPA6),ncbi_101107094(ARRDC3),ncbi_101108361(URB2),ncbi_101109915(OAS2),ncbi_101111204(MRM1),ncbi_101111234(IRF4),ncbi_101111305(TMEM63A),ncbi_101111650(ID1),ncbi_101111869(DPYSL5),ncbi_1…
GO:0044421	extracellular region part	5	4	ncbi_101104483(PRKAG2),ncbi_101107315(TDP2),ncbi_101109910(STC2),ncbi_101111848(ADIPOQ),ncbi_106990107(TPT1)	ncbi_101107064(HSPA6),ncbi_101112949(STC1),ncbi_101122202(C1QTNF1),ncbi_443483(COL1A1)
GO:0031012	extracellular matrix	1	2	ncbi_101120031(ADAMTS8)	ncbi_101103811(FBN3),ncbi_443483(COL1A1)
GO:0032991	macromolecular complex	12	15	ncbi_101102541(RPL6),ncbi_101114988(IGHMBP2),ncbi_101116417(SUV39H2),ncbi_101117395(RPL21),ncbi_101118514(BoLA-DQB),ncbi_101119747(CDH1),ncbi_101120392(BoLA-DQB),ncbi_101122635(ABHD6),ncbi_106990107(TPT1),ncbi_106991578(MAF),ncbi_114113983(Rps23),ncbi_443262(ARNTL)	ncbi_100135440(RPL6),ncbi_100302636(KLF4),ncbi_101107064(HSPA6),ncbi_101111234(IRF4),ncbi_101115838(GNG12),ncbi_101118080(NABP1),ncbi_105612706(SKIV2L),ncbi_105616722(SOX18),ncbi_114109131(INSIG2),ncbi_114110327(RPL12),ncbi_114113811(ABCC9),ncbi_114115272(MCUB),ncbi_443005(GAPDH),ncbi_443483(COL1A1),ncbi_780441(MX2)
GO:0043226	organelle	33	38	MSTRG.4689(MGST1),ncbi_100037663(Gstm5),ncbi_101102541(RPL6),ncbi_101104483(PRKAG2),ncbi_101106263(SHROOM3),ncbi_101107315(TDP2),ncbi_101108379(HOXC11),ncbi_101108411(Echdc3),ncbi_101109022(ESRRB),ncbi_101109910(STC2),ncbi_101110925(Myl6b),ncbi_101111848(ADIPOQ),ncbi_101111989(PIGT),ncbi_101112629(PTPN4),ncbi_101113354(RTN2),ncbi_101114988(IGHMBP2),ncbi_101116417(SUV39H2),ncbi_101117395(RPL21),nc…	ncbi_100135440(RPL6),ncbi_100302636(KLF4),ncbi_100316848(B4GALT7),ncbi_101103462(MGST1),ncbi_101104473(RND1),ncbi_101105600(RNF169),ncbi_101105958(HMGN2),ncbi_101106828(IFI6),ncbi_101107064(HSPA6),ncbi_101107094(ARRDC3),ncbi_101108361(URB2),ncbi_101109915(OAS2),ncbi_101111204(MRM1),ncbi_101111234(IRF4),ncbi_101111305(TMEM63A),ncbi_101111650(ID1),ncbi_101112518(CSRNP1),ncbi_101112949(STC1),ncbi_10…
GO:0044422	organelle part	14	17	MSTRG.4689(MGST1),ncbi_100037663(Gstm5),ncbi_101102541(RPL6),ncbi_101104483(PRKAG2),ncbi_101107315(TDP2),ncbi_101111989(PIGT),ncbi_101113354(RTN2),ncbi_101116417(SUV39H2),ncbi_101117395(RPL21),ncbi_101119747(CDH1),ncbi_106990107(TPT1),ncbi_114113983(Rps23),ncbi_114116628(SETD7),ncbi_443262(ARNTL)	ncbi_100135440(RPL6),ncbi_100302636(KLF4),ncbi_101103462(MGST1),ncbi_101105600(RNF169),ncbi_101111234(IRF4),ncbi_101111305(TMEM63A),ncbi_101120098(TTLL6),ncbi_101120326(TUBA1B),ncbi_101120619(TH),ncbi_105612706(SKIV2L),ncbi_105616722(SOX18),ncbi_114109131(INSIG2),ncbi_114110327(RPL12),ncbi_114113811(ABCC9),ncbi_114115272(MCUB),ncbi_443483(COL1A1),ncbi_494547(TLR9)
GO:0044420	extracellular matrix component	0	1	--	ncbi_443483(COL1A1)
GO:0044425	membrane part	14	19	MSTRG.4689(MGST1),ncbi_100642179(SLC22A3),ncbi_101109405(STXBP5L),ncbi_101109565(SLC28A1),ncbi_101111989(PIGT),ncbi_101113354(RTN2),ncbi_101118514(BoLA-DQB),ncbi_101119747(CDH1),ncbi_101120090(MAL2),ncbi_101120392(BoLA-DQB),ncbi_101121229(CLDN15),ncbi_101122635(ABHD6),ncbi_105601852(TVP23B),ncbi_105608393(VAMP3)	MSTRG.15496(--),ncbi_100316848(B4GALT7),ncbi_101103462(MGST1),ncbi_101105932(TVP23B),ncbi_101106828(IFI6),ncbi_101111305(TMEM63A),ncbi_101111972(DUOX1),ncbi_101113636(VCAM1),ncbi_101118069(CDH20),ncbi_101121723(FOLH1),ncbi_101122202(C1QTNF1),ncbi_101123247(PIK3R3),ncbi_114109131(INSIG2),ncbi_114113811(ABCC9),ncbi_114115272(MCUB),ncbi_443268(AQP4),ncbi_494547(TLR9),ncbi_780441(MX2),ncbi_780477(CLD…
GO:0016020	membrane	17	26	MSTRG.4689(MGST1),ncbi_100642179(SLC22A3),ncbi_101106263(SHROOM3),ncbi_101109405(STXBP5L),ncbi_101109565(SLC28A1),ncbi_101111989(PIGT),ncbi_101112629(PTPN4),ncbi_101113354(RTN2),ncbi_101118514(BoLA-DQB),ncbi_101119747(CDH1),ncbi_101120090(MAL2),ncbi_101120392(BoLA-DQB),ncbi_101121229(CLDN15),ncbi_101122635(ABHD6),ncbi_105601852(TVP23B),ncbi_105605834(SLC7A3),ncbi_105608393(VAMP3)	MSTRG.15496(--),ncbi_100316848(B4GALT7),ncbi_101103462(MGST1),ncbi_101104473(RND1),ncbi_101105600(RNF169),ncbi_101105932(TVP23B),ncbi_101106828(IFI6),ncbi_101107094(ARRDC3),ncbi_101111305(TMEM63A),ncbi_101111972(DUOX1),ncbi_101112196(RAPGEF4),ncbi_101113636(VCAM1),ncbi_101115838(GNG12),ncbi_101118069(CDH20),ncbi_101120619(TH),ncbi_101121723(FOLH1),ncbi_101122202(C1QTNF1),ncbi_101123247(PIK3R3),nc…
GO:0031974	membrane-enclosed lumen	6	2	ncbi_101104483(PRKAG2),ncbi_101107315(TDP2),ncbi_101116417(SUV39H2),ncbi_106990107(TPT1),ncbi_114116628(SETD7),ncbi_443262(ARNTL)	ncbi_101105600(RNF169),ncbi_105612706(SKIV2L)
GO:0099512	supramolecular fiber	0	1	--	ncbi_101120326(TUBA1B)

## Sheet: 3.5 y vs 6 y
Significant results of GO results in the 3.5 y vs 6 y
GO ID (level2)	GO Term (level2)	number_of_C-vs-D (up)	number_of_C-vs-D (down)	Genes_of_C-vs-D_up	Genes_of_C-vs-D_down
GO:0051179	localization	19	42	ncbi_100034669(TAC1),ncbi_101102456(SLC24A2),ncbi_101103481(ROS1),ncbi_101104046(SLC19A3),ncbi_101104226(C3AR1),ncbi_101105771(BANP),ncbi_101108867(IER3),ncbi_101110725(LAT),ncbi_101111237(Gak),ncbi_101113122(CD5L),ncbi_101115625(Ehd4),ncbi_101119737(NPTX1),ncbi_101120765(KLHL21),ncbi_101122247(APOBR),ncbi_105608622(CCT4),ncbi_114108638(AP5Z1),ncbi_114110441(NPC1),ncbi_114113811(ABCC9),ncbi_11411…	ncbi_100147785(SLC25A15),ncbi_100302083(CDKN1A),ncbi_100329218(SREBF1),ncbi_100642179(SLC22A3),ncbi_100885768(TFRC),ncbi_101103525(ABCG1),ncbi_101104483(PRKAG2),ncbi_101105455(CD248),ncbi_101106810(CRABP2),ncbi_101107055(ENSA),ncbi_101107690(HK2),ncbi_101108445(CCT6A),ncbi_101108683(TUB),ncbi_101108953(PDE4D),ncbi_101109565(SLC28A1),ncbi_101110829(Six2),ncbi_101110963(PVR),ncbi_101111757(PDE4B),n…
GO:0040011	locomotion	3	18	MSTRG.15496(--),ncbi_100034669(TAC1),ncbi_101104226(C3AR1)	ncbi_101104593(Enah),ncbi_101105455(CD248),ncbi_101108953(PDE4D),ncbi_101110829(Six2),ncbi_101110963(PVR),ncbi_101111757(PDE4B),ncbi_101113348(CNTN2),ncbi_101114604(SEMA3C),ncbi_101114980(ST8SIA2),ncbi_101117554(TNFRSF12A),ncbi_101117619(GDNF),ncbi_101119747(CDH1),ncbi_101122152(NANOS1),ncbi_101122635(ABHD6),ncbi_114108670(GCNT2),ncbi_114117353(ENAH),ncbi_443154(HYAL2),ncbi_780465(NOD2)
GO:0048518	positive regulation of biological process	7	30	MSTRG.5097(PABPC1),ncbi_100034669(TAC1),ncbi_101103355(CD83),ncbi_101104226(C3AR1),ncbi_101108867(IER3),ncbi_101115625(Ehd4),ncbi_494547(TLR9)	ncbi_100302083(CDKN1A),ncbi_100329218(SREBF1),ncbi_100885768(TFRC),ncbi_101103525(ABCG1),ncbi_101104483(PRKAG2),ncbi_101107085(Mief1),ncbi_101107513(FCN2),ncbi_101107740(LMCD1),ncbi_101108683(TUB),ncbi_101108953(PDE4D),ncbi_101110090(TPPP),ncbi_101110829(Six2),ncbi_101110963(PVR),ncbi_101111757(PDE4B),ncbi_101112723(TIGAR),ncbi_101112919(CCM2L),ncbi_101113348(CNTN2),ncbi_101114109(Lsm11),ncbi_101…
GO:0044699	single-organism process	41	94	MSTRG.15496(--),MSTRG.5097(PABPC1),ncbi_100034669(TAC1),ncbi_100196905(COL2A1),ncbi_101102456(SLC24A2),ncbi_101103355(CD83),ncbi_101103462(MGST1),ncbi_101103481(ROS1),ncbi_101104046(SLC19A3),ncbi_101104226(C3AR1),ncbi_101107483(TRIM45),ncbi_101108867(IER3),ncbi_101109846(GALNT1),ncbi_101110725(LAT),ncbi_101111237(Gak),ncbi_101112325(PPDPFL),ncbi_101112356(HIST1H1T),ncbi_101113636(VCAM1),ncbi_1011…	MSTRG.15413(--),MSTRG.4689(MGST1),ncbi_100302083(CDKN1A),ncbi_100329218(SREBF1),ncbi_100422803(Pitx3),ncbi_100642179(SLC22A3),ncbi_100885768(TFRC),ncbi_101102266(RNF34),ncbi_101103525(ABCG1),ncbi_101103913(PMEPA1),ncbi_101104254(DNAH2),ncbi_101104483(PRKAG2),ncbi_101104593(Enah),ncbi_101104939(PAQR8),ncbi_101105455(CD248),ncbi_101105498(ARL10),ncbi_101105683(Ccdc114),ncbi_101106244(TP53I3),ncbi_1…
GO:0007610	behavior	4	5	ncbi_100034669(TAC1),ncbi_101102456(SLC24A2),ncbi_101104226(C3AR1),ncbi_114110441(NPC1)	ncbi_100422803(Pitx3),ncbi_101108953(PDE4D),ncbi_101113348(CNTN2),ncbi_101113711(RIN1),ncbi_780465(NOD2)
GO:0032502	developmental process	11	42	MSTRG.15496(--),ncbi_100196905(COL2A1),ncbi_101103355(CD83),ncbi_101103481(ROS1),ncbi_101104226(C3AR1),ncbi_101107483(TRIM45),ncbi_101112325(PPDPFL),ncbi_101112356(HIST1H1T),ncbi_101114059(ASB2),ncbi_101117496(ASB4),ncbi_101119737(NPTX1)	MSTRG.4689(MGST1),ncbi_100302083(CDKN1A),ncbi_100422803(Pitx3),ncbi_100885768(TFRC),ncbi_101104593(Enah),ncbi_101104939(PAQR8),ncbi_101105455(CD248),ncbi_101105683(Ccdc114),ncbi_101106810(CRABP2),ncbi_101106898(POPDC2),ncbi_101106905(Ninj1),ncbi_101108683(TUB),ncbi_101108953(PDE4D),ncbi_101109022(ESRRB),ncbi_101109885(ANKRD6),ncbi_101110829(Six2),ncbi_101112535(DZIP1L),ncbi_101112558(IFRD1),ncbi_…
GO:0040007	growth	3	8	ncbi_101103481(ROS1),ncbi_101112342(RASGRP4),ncbi_101122544(OSGIN1)	ncbi_100302083(CDKN1A),ncbi_101108953(PDE4D),ncbi_101109022(ESRRB),ncbi_101112919(CCM2L),ncbi_101117554(TNFRSF12A),ncbi_101118490(TIRAP),ncbi_443154(HYAL2),ncbi_780465(NOD2)
GO:0071840	cellular component organization or biogenesis	14	40	ncbi_100034669(TAC1),ncbi_100196905(COL2A1),ncbi_101103462(MGST1),ncbi_101108867(IER3),ncbi_101111237(Gak),ncbi_101112356(HIST1H1T),ncbi_101115625(Ehd4),ncbi_101119737(NPTX1),ncbi_101120765(KLHL21),ncbi_101122544(OSGIN1),ncbi_101123292(HIST3H2A),ncbi_105613621(SNU13),ncbi_114110441(NPC1),ncbi_114114874(RPL23)	MSTRG.4689(MGST1),ncbi_100302083(CDKN1A),ncbi_100329218(SREBF1),ncbi_101103525(ABCG1),ncbi_101103913(PMEPA1),ncbi_101104483(PRKAG2),ncbi_101104593(Enah),ncbi_101105335(TSPYL4),ncbi_101105683(Ccdc114),ncbi_101107055(ENSA),ncbi_101107085(Mief1),ncbi_101108307(Col23a1),ncbi_101108683(TUB),ncbi_101108953(PDE4D),ncbi_101109022(ESRRB),ncbi_101110090(TPPP),ncbi_101110522(PIGW),ncbi_101110829(Six2),ncbi_…
GO:0022610	biological adhesion	6	8	ncbi_101103355(CD83),ncbi_101108165(PCDH10),ncbi_101110725(LAT),ncbi_101113636(VCAM1),ncbi_101116091(CDH6),ncbi_780477(CLDN4)	MSTRG.15413(--),ncbi_101106905(Ninj1),ncbi_101110963(PVR),ncbi_101112919(CCM2L),ncbi_101117554(TNFRSF12A),ncbi_101119747(CDH1),ncbi_114108670(GCNT2),ncbi_780465(NOD2)
GO:0051704	multi-organism process	7	10	ncbi_100034669(TAC1),ncbi_101103481(ROS1),ncbi_101112356(HIST1H1T),ncbi_105608622(CCT4),ncbi_105613621(SNU13),ncbi_114114874(RPL23),ncbi_494547(TLR9)	MSTRG.4689(MGST1),ncbi_101104939(PAQR8),ncbi_101108445(CCT6A),ncbi_101108953(PDE4D),ncbi_101111757(PDE4B),ncbi_101118116(Ybx2),ncbi_101118490(TIRAP),ncbi_101121360(RPL23),ncbi_443154(HYAL2),ncbi_780465(NOD2)
GO:0048519	negative regulation of biological process	7	21	MSTRG.15496(--),MSTRG.5097(PABPC1),ncbi_101103355(CD83),ncbi_101105771(BANP),ncbi_101108867(IER3),ncbi_114110441(NPC1),ncbi_494547(TLR9)	ncbi_100302083(CDKN1A),ncbi_101102266(RNF34),ncbi_101103913(PMEPA1),ncbi_101104483(PRKAG2),ncbi_101107055(ENSA),ncbi_101108953(PDE4D),ncbi_101109885(ANKRD6),ncbi_101111757(PDE4B),ncbi_101112723(TIGAR),ncbi_101112919(CCM2L),ncbi_101113161(PYCR1),ncbi_101113348(CNTN2),ncbi_101114749(PTPN3),ncbi_101117619(GDNF),ncbi_101119218(CILP),ncbi_101119747(CDH1),ncbi_101123017(GPRASP1),ncbi_105610011(USH2A),n…
GO:0032501	multicellular organismal process	16	44	MSTRG.15496(--),ncbi_100034669(TAC1),ncbi_100196905(COL2A1),ncbi_101102456(SLC24A2),ncbi_101103355(CD83),ncbi_101103481(ROS1),ncbi_101104226(C3AR1),ncbi_101107483(TRIM45),ncbi_101108867(IER3),ncbi_101112356(HIST1H1T),ncbi_101114059(ASB2),ncbi_101117496(ASB4),ncbi_101119737(NPTX1),ncbi_114110441(NPC1),ncbi_494547(TLR9),ncbi_780477(CLDN4)	ncbi_100329218(SREBF1),ncbi_100422803(Pitx3),ncbi_100885768(TFRC),ncbi_101103525(ABCG1),ncbi_101104593(Enah),ncbi_101104939(PAQR8),ncbi_101105455(CD248),ncbi_101106810(CRABP2),ncbi_101106898(POPDC2),ncbi_101106905(Ninj1),ncbi_101107513(FCN2),ncbi_101107740(LMCD1),ncbi_101108307(Col23a1),ncbi_101108683(TUB),ncbi_101108953(PDE4D),ncbi_101109022(ESRRB),ncbi_101109885(ANKRD6),ncbi_101110829(Six2),ncb…
GO:0002376	immune system process	7	11	ncbi_101103355(CD83),ncbi_101104226(C3AR1),ncbi_101110725(LAT),ncbi_105603928(BoLA-DQB),ncbi_114108725(ULBP1),ncbi_114113811(ABCC9),ncbi_494547(TLR9)	ncbi_100302083(CDKN1A),ncbi_100885768(TFRC),ncbi_101105455(CD248),ncbi_101107513(FCN2),ncbi_101108953(PDE4D),ncbi_101110963(PVR),ncbi_101111757(PDE4B),ncbi_101112877(CHST3),ncbi_101118490(TIRAP),ncbi_443154(HYAL2),ncbi_780465(NOD2)
GO:0048511	rhythmic process	0	2	--	ncbi_100329218(SREBF1),ncbi_101116417(SUV39H2)
GO:0022414	reproductive process	4	6	ncbi_101103481(ROS1),ncbi_101112356(HIST1H1T),ncbi_105608622(CCT4),ncbi_105613621(SNU13)	MSTRG.4689(MGST1),ncbi_101104939(PAQR8),ncbi_101108445(CCT6A),ncbi_101109022(ESRRB),ncbi_101116417(SUV39H2),ncbi_101118116(Ybx2)
GO:0000003	reproduction	4	6	ncbi_101103481(ROS1),ncbi_101112356(HIST1H1T),ncbi_105608622(CCT4),ncbi_105613621(SNU13)	MSTRG.4689(MGST1),ncbi_101104939(PAQR8),ncbi_101108445(CCT6A),ncbi_101109022(ESRRB),ncbi_101116417(SUV39H2),ncbi_101118116(Ybx2)
GO:0001906	cell killing	0	1	--	ncbi_101110963(PVR)
GO:0050896	response to stimulus	22	46	MSTRG.15496(--),ncbi_100034669(TAC1),ncbi_100196905(COL2A1),ncbi_101103355(CD83),ncbi_101103462(MGST1),ncbi_101103481(ROS1),ncbi_101104226(C3AR1),ncbi_101107064(HSPA6),ncbi_101108867(IER3),ncbi_101110725(LAT),ncbi_101112342(RASGRP4),ncbi_101114059(ASB2),ncbi_101115625(Ehd4),ncbi_101115970(SESN1),ncbi_101117496(ASB4),ncbi_101118482(CXCR6),ncbi_101119737(NPTX1),ncbi_101121275(NKIRAS2),ncbi_10112251…	MSTRG.4689(MGST1),ncbi_100302083(CDKN1A),ncbi_100329218(SREBF1),ncbi_100642179(SLC22A3),ncbi_101102266(RNF34),ncbi_101103525(ABCG1),ncbi_101103913(PMEPA1),ncbi_101104483(PRKAG2),ncbi_101104593(Enah),ncbi_101105498(ARL10),ncbi_101107055(ENSA),ncbi_101107513(FCN2),ncbi_101107740(LMCD1),ncbi_101108683(TUB),ncbi_101108953(PDE4D),ncbi_101109022(ESRRB),ncbi_101109885(ANKRD6),ncbi_101110963(PVR),ncbi_10…
GO:0044848	biological phase	0	1	--	ncbi_101107055(ENSA)
GO:0008152	metabolic process	24	77	MSTRG.15496(--),MSTRG.5097(PABPC1),ncbi_100196905(COL2A1),ncbi_101103462(MGST1),ncbi_101103481(ROS1),ncbi_101105771(BANP),ncbi_101106773(CDKL2),ncbi_101108867(IER3),ncbi_101109846(GALNT1),ncbi_101110725(LAT),ncbi_101111237(Gak),ncbi_101112342(RASGRP4),ncbi_101114059(ASB2),ncbi_101115625(Ehd4),ncbi_101117496(ASB4),ncbi_101120765(KLHL21),ncbi_101123292(HIST3H2A),ncbi_101123646(AFMID),ncbi_105605903…	MSTRG.15413(--),MSTRG.4689(MGST1),ncbi_100302083(CDKN1A),ncbi_100329218(SREBF1),ncbi_100422803(Pitx3),ncbi_100642179(SLC22A3),ncbi_101102121(TRMT9B),ncbi_101102266(RNF34),ncbi_101102525(QTRT2),ncbi_101102700(TBC1D2),ncbi_101103525(ABCG1),ncbi_101103653(WDYHV1),ncbi_101103913(PMEPA1),ncbi_101104483(PRKAG2),ncbi_101106146(ORC2),ncbi_101106244(TP53I3),ncbi_101106810(CRABP2),ncbi_101107055(ENSA),ncbi…
GO:0050789	regulation of biological process	24	68	MSTRG.15496(--),MSTRG.5097(PABPC1),ncbi_100034669(TAC1),ncbi_100196905(COL2A1),ncbi_101102456(SLC24A2),ncbi_101103355(CD83),ncbi_101103481(ROS1),ncbi_101104226(C3AR1),ncbi_101105771(BANP),ncbi_101108867(IER3),ncbi_101110725(LAT),ncbi_101111237(Gak),ncbi_101112342(RASGRP4),ncbi_101114059(ASB2),ncbi_101115625(Ehd4),ncbi_101115970(SESN1),ncbi_101117496(ASB4),ncbi_101118482(CXCR6),ncbi_101121275(NKIR…	MSTRG.15413(--),ncbi_100302083(CDKN1A),ncbi_100329218(SREBF1),ncbi_100422803(Pitx3),ncbi_100642179(SLC22A3),ncbi_100885768(TFRC),ncbi_101102266(RNF34),ncbi_101102700(TBC1D2),ncbi_101103525(ABCG1),ncbi_101103913(PMEPA1),ncbi_101104483(PRKAG2),ncbi_101105455(CD248),ncbi_101105498(ARL10),ncbi_101106898(POPDC2),ncbi_101107055(ENSA),ncbi_101107085(Mief1),ncbi_101107513(FCN2),ncbi_101107690(HK2),ncbi_1…
GO:0065007	biological regulation	25	71	MSTRG.15496(--),MSTRG.5097(PABPC1),ncbi_100034669(TAC1),ncbi_100196905(COL2A1),ncbi_101102456(SLC24A2),ncbi_101103355(CD83),ncbi_101103481(ROS1),ncbi_101104226(C3AR1),ncbi_101105771(BANP),ncbi_101108867(IER3),ncbi_101110725(LAT),ncbi_101111237(Gak),ncbi_101112342(RASGRP4),ncbi_101114059(ASB2),ncbi_101115625(Ehd4),ncbi_101115970(SESN1),ncbi_101117496(ASB4),ncbi_101118482(CXCR6),ncbi_101121275(NKIR…	MSTRG.15413(--),ncbi_100302083(CDKN1A),ncbi_100329218(SREBF1),ncbi_100422803(Pitx3),ncbi_100642179(SLC22A3),ncbi_100885768(TFRC),ncbi_101102266(RNF34),ncbi_101102700(TBC1D2),ncbi_101103525(ABCG1),ncbi_101103913(PMEPA1),ncbi_101104483(PRKAG2),ncbi_101105455(CD248),ncbi_101105498(ARL10),ncbi_101106898(POPDC2),ncbi_101107055(ENSA),ncbi_101107085(Mief1),ncbi_101107513(FCN2),ncbi_101107690(HK2),ncbi_1…
GO:0023052	signaling	14	28	MSTRG.15496(--),ncbi_100034669(TAC1),ncbi_100196905(COL2A1),ncbi_101102456(SLC24A2),ncbi_101103481(ROS1),ncbi_101104226(C3AR1),ncbi_101110725(LAT),ncbi_101114059(ASB2),ncbi_101115970(SESN1),ncbi_101117496(ASB4),ncbi_101118482(CXCR6),ncbi_101121275(NKIRAS2),ncbi_101122511(TMBIM6),ncbi_494547(TLR9)	ncbi_100302083(CDKN1A),ncbi_100329218(SREBF1),ncbi_101102266(RNF34),ncbi_101103913(PMEPA1),ncbi_101104483(PRKAG2),ncbi_101105498(ARL10),ncbi_101107513(FCN2),ncbi_101107740(LMCD1),ncbi_101108683(TUB),ncbi_101108953(PDE4D),ncbi_101109022(ESRRB),ncbi_101109885(ANKRD6),ncbi_101111757(PDE4B),ncbi_101113348(CNTN2),ncbi_101113711(RIN1),ncbi_101116361(Rnf115),ncbi_101117554(TNFRSF12A),ncbi_101117619(GDNF…
GO:0009987	cellular process	38	96	MSTRG.15496(--),MSTRG.5097(PABPC1),ncbi_100034669(TAC1),ncbi_100196905(COL2A1),ncbi_101102456(SLC24A2),ncbi_101103355(CD83),ncbi_101103462(MGST1),ncbi_101103481(ROS1),ncbi_101104226(C3AR1),ncbi_101106773(CDKL2),ncbi_101107064(HSPA6),ncbi_101108867(IER3),ncbi_101109846(GALNT1),ncbi_101110725(LAT),ncbi_101111237(Gak),ncbi_101112325(PPDPFL),ncbi_101112356(HIST1H1T),ncbi_101114059(ASB2),ncbi_10111562…	MSTRG.4689(MGST1),ncbi_100302083(CDKN1A),ncbi_100329218(SREBF1),ncbi_100422803(Pitx3),ncbi_100642179(SLC22A3),ncbi_100885768(TFRC),ncbi_101102266(RNF34),ncbi_101102525(QTRT2),ncbi_101103525(ABCG1),ncbi_101103913(PMEPA1),ncbi_101104254(DNAH2),ncbi_101104483(PRKAG2),ncbi_101104593(Enah),ncbi_101104939(PAQR8),ncbi_101105335(TSPYL4),ncbi_101105455(CD248),ncbi_101105498(ARL10),ncbi_101105683(Ccdc114),…
GO:0005488	binding	31	87	MSTRG.15496(--),MSTRG.5097(PABPC1),ncbi_100034669(TAC1),ncbi_100196905(COL2A1),ncbi_101103481(ROS1),ncbi_101106773(CDKL2),ncbi_101107064(HSPA6),ncbi_101107483(TRIM45),ncbi_101109846(GALNT1),ncbi_101110725(LAT),ncbi_101111237(Gak),ncbi_101112342(RASGRP4),ncbi_101112356(HIST1H1T),ncbi_101115625(Ehd4),ncbi_101116091(CDH6),ncbi_101117496(ASB4),ncbi_101117742(Wbp1),ncbi_101119737(NPTX1),ncbi_101119773…	MSTRG.15413(--),MSTRG.4689(MGST1),ncbi_100302083(CDKN1A),ncbi_100329218(SREBF1),ncbi_100422803(Pitx3),ncbi_100642179(SLC22A3),ncbi_100885768(TFRC),ncbi_101102266(RNF34),ncbi_101102525(QTRT2),ncbi_101102700(TBC1D2),ncbi_101103525(ABCG1),ncbi_101103913(PMEPA1),ncbi_101104254(DNAH2),ncbi_101104483(PRKAG2),ncbi_101104593(Enah),ncbi_101104939(PAQR8),ncbi_101105455(CD248),ncbi_101105498(ARL10),ncbi_101…
GO:0016209	antioxidant activity	1	1	ncbi_101103462(MGST1)	MSTRG.4689(MGST1)
GO:0003824	catalytic activity	14	44	MSTRG.15496(--),ncbi_100196905(COL2A1),ncbi_101103462(MGST1),ncbi_101103481(ROS1),ncbi_101106773(CDKL2),ncbi_101107064(HSPA6),ncbi_101109846(GALNT1),ncbi_101111237(Gak),ncbi_101114059(ASB2),ncbi_101119773(GBP7),ncbi_101120765(KLHL21),ncbi_101123646(AFMID),ncbi_105605903(ADH4),ncbi_114113811(ABCC9)	MSTRG.4689(MGST1),ncbi_100302083(CDKN1A),ncbi_101102121(TRMT9B),ncbi_101102266(RNF34),ncbi_101102525(QTRT2),ncbi_101103525(ABCG1),ncbi_101103594(FICD),ncbi_101103653(WDYHV1),ncbi_101104254(DNAH2),ncbi_101104483(PRKAG2),ncbi_101105779(PPTC7),ncbi_101106244(TP53I3),ncbi_101106823(HDHD3),ncbi_101107690(HK2),ncbi_101108694(PDE12),ncbi_101108953(PDE4D),ncbi_101109670(Uck2),ncbi_101110522(PIGW),ncbi_10…
GO:0045182	translation regulator activity	1	0	MSTRG.5097(PABPC1)	--
GO:0098772	molecular function regulator	1	7	ncbi_101112342(RASGRP4)	ncbi_100302083(CDKN1A),ncbi_101102700(TBC1D2),ncbi_101104483(PRKAG2),ncbi_101107055(ENSA),ncbi_101114749(PTPN3),ncbi_101123648(ARHGAP23),ncbi_443154(HYAL2)
GO:0005215	transporter activity	3	7	ncbi_101102456(SLC24A2),ncbi_101110725(LAT),ncbi_114113811(ABCC9)	ncbi_100642179(SLC22A3),ncbi_101103525(ABCG1),ncbi_101109565(SLC28A1),ncbi_101115549(GPIHBP1),ncbi_101118797(SLC2A4),ncbi_114108606(SLC2A5),ncbi_114117869(ATP1B3)
GO:0005198	structural molecule activity	2	2	ncbi_100196905(COL2A1),ncbi_114114874(RPL23)	ncbi_101118481(RPL5),ncbi_101121360(RPL23)
GO:0001071	nucleic acid binding transcription factor activity	0	6	--	ncbi_100329218(SREBF1),ncbi_100422803(Pitx3),ncbi_101109022(ESRRB),ncbi_101110829(Six2),ncbi_101112976(CREB5),ncbi_106991578(MAF)
GO:0060089	molecular transducer activity	7	8	MSTRG.15496(--),ncbi_101104226(C3AR1),ncbi_101118482(CXCR6),ncbi_101122247(APOBR),ncbi_114110441(NPC1),ncbi_114113811(ABCC9),ncbi_494547(TLR9)	ncbi_100885768(TFRC),ncbi_101107513(FCN2),ncbi_101108683(TUB),ncbi_101109022(ESRRB),ncbi_101114557(NPR3),ncbi_101114604(SEMA3C),ncbi_443154(HYAL2),ncbi_443535(LDLR)
GO:0000988	transcription factor activity, protein binding	0	2	--	ncbi_101107740(LMCD1),ncbi_101109022(ESRRB)
GO:0004871	signal transducer activity	5	4	ncbi_101104226(C3AR1),ncbi_101118482(CXCR6),ncbi_114110441(NPC1),ncbi_114113811(ABCC9),ncbi_494547(TLR9)	ncbi_101107513(FCN2),ncbi_101108683(TUB),ncbi_101109022(ESRRB),ncbi_101114557(NPR3)
GO:0016020	membrane	22	58	MSTRG.15496(--),ncbi_100034669(TAC1),ncbi_101102456(SLC24A2),ncbi_101103462(MGST1),ncbi_101103481(ROS1),ncbi_101104226(C3AR1),ncbi_101105932(TVP23B),ncbi_101108165(PCDH10),ncbi_101109846(GALNT1),ncbi_101110725(LAT),ncbi_101113636(VCAM1),ncbi_101115625(Ehd4),ncbi_101116091(CDH6),ncbi_101118482(CXCR6),ncbi_101119737(NPTX1),ncbi_101122511(TMBIM6),ncbi_105603928(BoLA-DQB),ncbi_114108638(AP5Z1),ncbi_1…	MSTRG.4689(MGST1),ncbi_100147785(SLC25A15),ncbi_100180629(TSPAN9),ncbi_100642179(SLC22A3),ncbi_100885768(TFRC),ncbi_101102266(RNF34),ncbi_101103525(ABCG1),ncbi_101103913(PMEPA1),ncbi_101104593(Enah),ncbi_101104939(PAQR8),ncbi_101106146(ORC2),ncbi_101106243(MYADM),ncbi_101106898(POPDC2),ncbi_101106905(Ninj1),ncbi_101107085(Mief1),ncbi_101107513(FCN2),ncbi_101107690(HK2),ncbi_101108307(Col23a1),ncb…
GO:0030054	cell junction	4	9	MSTRG.5097(PABPC1),ncbi_101110725(LAT),ncbi_114114874(RPL23),ncbi_780477(CLDN4)	MSTRG.15413(--),ncbi_100180629(TSPAN9),ncbi_101104593(Enah),ncbi_101110963(PVR),ncbi_101119747(CDH1),ncbi_101121229(CLDN15),ncbi_101121360(RPL23),ncbi_114117353(ENAH),ncbi_780518(CLMP)
GO:0005623	cell	32	96	MSTRG.5097(PABPC1),ncbi_100034669(TAC1),ncbi_100196905(COL2A1),ncbi_101103462(MGST1),ncbi_101105771(BANP),ncbi_101105810(GIMAP4),ncbi_101107064(HSPA6),ncbi_101107483(TRIM45),ncbi_101108867(IER3),ncbi_101109846(GALNT1),ncbi_101110725(LAT),ncbi_101111237(Gak),ncbi_101112342(RASGRP4),ncbi_101112356(HIST1H1T),ncbi_101114059(ASB2),ncbi_101115625(Ehd4),ncbi_101117496(ASB4),ncbi_101119737(NPTX1),ncbi_10…	MSTRG.15413(--),MSTRG.4689(MGST1),ncbi_100147785(SLC25A15),ncbi_100180629(TSPAN9),ncbi_100302083(CDKN1A),ncbi_100329218(SREBF1),ncbi_100422803(Pitx3),ncbi_100885768(TFRC),ncbi_101102266(RNF34),ncbi_101102525(QTRT2),ncbi_101102700(TBC1D2),ncbi_101103525(ABCG1),ncbi_101103653(WDYHV1),ncbi_101103913(PMEPA1),ncbi_101104254(DNAH2),ncbi_101104483(PRKAG2),ncbi_101104593(Enah),ncbi_101105455(CD248),ncbi_…
GO:0044464	cell part	32	96	MSTRG.5097(PABPC1),ncbi_100034669(TAC1),ncbi_100196905(COL2A1),ncbi_101103462(MGST1),ncbi_101105771(BANP),ncbi_101105810(GIMAP4),ncbi_101107064(HSPA6),ncbi_101107483(TRIM45),ncbi_101108867(IER3),ncbi_101109846(GALNT1),ncbi_101110725(LAT),ncbi_101111237(Gak),ncbi_101112342(RASGRP4),ncbi_101112356(HIST1H1T),ncbi_101114059(ASB2),ncbi_101115625(Ehd4),ncbi_101117496(ASB4),ncbi_101119737(NPTX1),ncbi_10…	MSTRG.15413(--),MSTRG.4689(MGST1),ncbi_100147785(SLC25A15),ncbi_100180629(TSPAN9),ncbi_100302083(CDKN1A),ncbi_100329218(SREBF1),ncbi_100422803(Pitx3),ncbi_100885768(TFRC),ncbi_101102266(RNF34),ncbi_101102525(QTRT2),ncbi_101102700(TBC1D2),ncbi_101103525(ABCG1),ncbi_101103653(WDYHV1),ncbi_101103913(PMEPA1),ncbi_101104254(DNAH2),ncbi_101104483(PRKAG2),ncbi_101104593(Enah),ncbi_101105455(CD248),ncbi_…
GO:0044425	membrane part	19	41	MSTRG.15496(--),ncbi_101102456(SLC24A2),ncbi_101103462(MGST1),ncbi_101103481(ROS1),ncbi_101104226(C3AR1),ncbi_101105932(TVP23B),ncbi_101108165(PCDH10),ncbi_101109846(GALNT1),ncbi_101110725(LAT),ncbi_101113636(VCAM1),ncbi_101116091(CDH6),ncbi_101118482(CXCR6),ncbi_101122511(TMBIM6),ncbi_105603928(BoLA-DQB),ncbi_114108638(AP5Z1),ncbi_114110441(NPC1),ncbi_114113811(ABCC9),ncbi_494547(TLR9),ncbi_7804…	MSTRG.4689(MGST1),ncbi_100147785(SLC25A15),ncbi_100180629(TSPAN9),ncbi_100642179(SLC22A3),ncbi_100885768(TFRC),ncbi_101103525(ABCG1),ncbi_101103913(PMEPA1),ncbi_101104939(PAQR8),ncbi_101106243(MYADM),ncbi_101106898(POPDC2),ncbi_101106905(Ninj1),ncbi_101107085(Mief1),ncbi_101107513(FCN2),ncbi_101108307(Col23a1),ncbi_101108476(MFSD9),ncbi_101108953(PDE4D),ncbi_101109565(SLC28A1),ncbi_101110522(PIGW…
GO:0044422	organelle part	15	37	MSTRG.5097(PABPC1),ncbi_100196905(COL2A1),ncbi_101103462(MGST1),ncbi_101109846(GALNT1),ncbi_101112356(HIST1H1T),ncbi_101115625(Ehd4),ncbi_101120765(KLHL21),ncbi_101121228(SEPT1),ncbi_101123292(HIST3H2A),ncbi_105608622(CCT4),ncbi_105613621(SNU13),ncbi_114110441(NPC1),ncbi_114113811(ABCC9),ncbi_114114874(RPL23),ncbi_494547(TLR9)	MSTRG.4689(MGST1),ncbi_100147785(SLC25A15),ncbi_101102266(RNF34),ncbi_101103913(PMEPA1),ncbi_101104254(DNAH2),ncbi_101104483(PRKAG2),ncbi_101105683(Ccdc114),ncbi_101106146(ORC2),ncbi_101107055(ENSA),ncbi_101107085(Mief1),ncbi_101107690(HK2),ncbi_101108307(Col23a1),ncbi_101108694(PDE12),ncbi_101108953(PDE4D),ncbi_101109229(WDR3),ncbi_101110522(PIGW),ncbi_101110829(Six2),ncbi_101111384(HM13),ncbi_1…
GO:0031012	extracellular matrix	1	3	ncbi_100196905(COL2A1)	ncbi_101119210(ADAMTSL5),ncbi_101120031(ADAMTS8),ncbi_105610011(USH2A)
GO:0044420	extracellular matrix component	1	1	ncbi_100196905(COL2A1)	ncbi_105610011(USH2A)
GO:0005576	extracellular region	5	6	MSTRG.15496(--),ncbi_100034669(TAC1),ncbi_100196905(COL2A1),ncbi_101107064(HSPA6),ncbi_101113122(CD5L)	ncbi_100885768(TFRC),ncbi_101104483(PRKAG2),ncbi_101107740(LMCD1),ncbi_101112424(LOXL1),ncbi_101114604(SEMA3C),ncbi_443535(LDLR)
GO:0044421	extracellular region part	4	6	ncbi_100034669(TAC1),ncbi_100196905(COL2A1),ncbi_101107064(HSPA6),ncbi_101113122(CD5L)	ncbi_100885768(TFRC),ncbi_101104483(PRKAG2),ncbi_101107740(LMCD1),ncbi_101112424(LOXL1),ncbi_101114604(SEMA3C),ncbi_443535(LDLR)
GO:0032991	macromolecular complex	15	22	MSTRG.5097(PABPC1),ncbi_100196905(COL2A1),ncbi_101107064(HSPA6),ncbi_101110725(LAT),ncbi_101112356(HIST1H1T),ncbi_101114059(ASB2),ncbi_101117496(ASB4),ncbi_101120765(KLHL21),ncbi_101123292(HIST3H2A),ncbi_105603928(BoLA-DQB),ncbi_105608622(CCT4),ncbi_105613621(SNU13),ncbi_114108638(AP5Z1),ncbi_114113811(ABCC9),ncbi_114114874(RPL23)	ncbi_100302083(CDKN1A),ncbi_101104254(DNAH2),ncbi_101105683(Ccdc114),ncbi_101106146(ORC2),ncbi_101108445(CCT6A),ncbi_101108953(PDE4D),ncbi_101111757(PDE4B),ncbi_101113348(CNTN2),ncbi_101114109(Lsm11),ncbi_101116417(SUV39H2),ncbi_101117080(STON2),ncbi_101117811(THOC6),ncbi_101118116(Ybx2),ncbi_101118481(RPL5),ncbi_101119747(CDH1),ncbi_101121360(RPL23),ncbi_101122326(PSMD5),ncbi_101122635(ABHD6),nc…
GO:0043226	organelle	25	81	MSTRG.5097(PABPC1),ncbi_100196905(COL2A1),ncbi_101103462(MGST1),ncbi_101105771(BANP),ncbi_101107064(HSPA6),ncbi_101108867(IER3),ncbi_101109846(GALNT1),ncbi_101110725(LAT),ncbi_101112356(HIST1H1T),ncbi_101113122(CD5L),ncbi_101115625(Ehd4),ncbi_101116091(CDH6),ncbi_101119737(NPTX1),ncbi_101120765(KLHL21),ncbi_101121228(SEPT1),ncbi_101122511(TMBIM6),ncbi_101123292(HIST3H2A),ncbi_101123646(AFMID),ncb…	MSTRG.4689(MGST1),ncbi_100147785(SLC25A15),ncbi_100302083(CDKN1A),ncbi_100329218(SREBF1),ncbi_100422803(Pitx3),ncbi_100885768(TFRC),ncbi_101102266(RNF34),ncbi_101102525(QTRT2),ncbi_101102700(TBC1D2),ncbi_101103525(ABCG1),ncbi_101103653(WDYHV1),ncbi_101103913(PMEPA1),ncbi_101104254(DNAH2),ncbi_101104483(PRKAG2),ncbi_101105455(CD248),ncbi_101105683(Ccdc114),ncbi_101105779(PPTC7),ncbi_101106146(ORC2…
GO:0045202	synapse	0	2	--	ncbi_101106189(PPFIA4),ncbi_106991220(DOK7)
GO:0099512	supramolecular fiber	1	0	ncbi_101120765(KLHL21)	--
GO:0031974	membrane-enclosed lumen	2	8	ncbi_100196905(COL2A1),ncbi_105613621(SNU13)	ncbi_101102266(RNF34),ncbi_101104483(PRKAG2),ncbi_101107055(ENSA),ncbi_101110829(Six2),ncbi_101114109(Lsm11),ncbi_101116417(SUV39H2),ncbi_101119990(SRSF5),ncbi_101120039(DPH3)
GO:0044456	synapse part	0	1	--	ncbi_101106189(PPFIA4)

## Sheet: 4 m vs 6 y
Significant results of GO results in the 4 m vs 6 y
GO ID (level2)	GO Term (level2)	number_of_A-vs-D (up)	number_of_A-vs-D (down)	Genes_of_A-vs-D_up	Genes_of_A-vs-D_down
GO:0032502	developmental process	85	178	MSTRG.15496(--),ncbi_100127218(AHSP),ncbi_100137067(FABP4),ncbi_100144423(CYP19A1),ncbi_100196903(IDO1),ncbi_100233164(CNGA3),ncbi_100302558(ZFAND5),ncbi_101101920(SELENOP),ncbi_101103759(KDM2B),ncbi_101104226(C3AR1),ncbi_101104361(APOD),ncbi_101104734(PTPRO),ncbi_101104763(SLITRK5),ncbi_101105177(TGM3),ncbi_101105489(PAX8),ncbi_101105924(OSR2),ncbi_101106284(Ppp1cc),ncbi_101107091(KLHL3),ncbi_10…	MSTRG.18905(YBX1),MSTRG.4689(MGST1),MSTRG.5042(Ralbp1),ncbi_100048993(ANXA2),ncbi_100101231(COL3A1),ncbi_100125616(TNMD),ncbi_100135448(ARNT2),ncbi_100141299(CD9),ncbi_100144761(CDK6),ncbi_100144763(CCND1),ncbi_100192429(HLF),ncbi_100302348(PMP22),ncbi_100307048(SPARC),ncbi_100422803(Pitx3),ncbi_100820746(ANKRD1),ncbi_100885762(GADD45G),ncbi_100885768(TFRC),ncbi_101101900(FREM2),ncbi_101102076(SR…
GO:0040011	locomotion	25	68	MSTRG.15496(--),ncbi_100034669(TAC1),ncbi_100302558(ZFAND5),ncbi_101104226(C3AR1),ncbi_101104361(APOD),ncbi_101104734(PTPRO),ncbi_101107094(ARRDC3),ncbi_101107288(EPHA7),ncbi_101109148(UNC5D),ncbi_101109245(HDAC6),ncbi_101111519(RFX3),ncbi_101112949(STC1),ncbi_101113426(PRKCQ),ncbi_101113935(UNC5C),ncbi_101114494(NR4A2),ncbi_101115044(CCL14),ncbi_101117297(CCL26),ncbi_101117396(KLF7),ncbi_1011193…	ncbi_100101231(COL3A1),ncbi_100307048(SPARC),ncbi_101102076(SRCIN1),ncbi_101103014(ABHD2),ncbi_101103371(Lrrc15),ncbi_101104160(TNFAIP1),ncbi_101104187(MDGA1),ncbi_101104341(Slit3),ncbi_101104593(Enah),ncbi_101105128(ADAM15),ncbi_101105455(CD248),ncbi_101105541(ECM1),ncbi_101105836(MYOC),ncbi_101106132(Sox8),ncbi_101106340(DCLK1),ncbi_101106679(PODXL),ncbi_101106801(PLXND1),ncbi_101106926(PKN3),n…
GO:0022610	biological adhesion	23	56	MSTRG.19184(GBP2),MSTRG.9092(--),ncbi_100196903(IDO1),ncbi_101104361(APOD),ncbi_101104734(PTPRO),ncbi_101106727(CD2),ncbi_101107288(EPHA7),ncbi_101108962(HLA-DQA2),ncbi_101109805(ZBTB1),ncbi_101111126(IL7R),ncbi_101111234(IRF4),ncbi_101113203(VSIG4),ncbi_101113426(PRKCQ),ncbi_101113467(CYTIP),ncbi_101116091(CDH6),ncbi_101117084(Tbx18),ncbi_101118005(CNTN1),ncbi_101119104(RORC),ncbi_101122429(LAMC…	ncbi_100101231(COL3A1),ncbi_100141299(CD9),ncbi_100144761(CDK6),ncbi_101101900(FREM2),ncbi_101103068(SMAD6),ncbi_101103276(Ctps1),ncbi_101103371(Lrrc15),ncbi_101103410(Hes5),ncbi_101104473(RND1),ncbi_101105550(COL13A1),ncbi_101105662(GLDN),ncbi_101105836(MYOC),ncbi_101106077(PCDH12),ncbi_101106679(PODXL),ncbi_101107101(NID2),ncbi_101107210(SOX13),ncbi_101107777(COL5A1),ncbi_101107864(COMP),ncbi_1…
GO:0008152	metabolic process	223	299	MSTRG.11228(--),MSTRG.14833(IGHA2),MSTRG.15496(--),MSTRG.5097(PABPC1),MSTRG.9092(--),ncbi_100127218(AHSP),ncbi_100137067(FABP4),ncbi_100142676(FBXO32),ncbi_100144423(CYP19A1),ncbi_100147780(SLC25A33),ncbi_100169699(LIPE),ncbi_100169937(FBXL3),ncbi_100196903(IDO1),ncbi_100337686(PON3),ncbi_100820742(GPX1),ncbi_101101969(RASGRP3),ncbi_101102276(PMF1),ncbi_101102423(PLCXD3),ncbi_101102434(ME3),ncbi_…	MSTRG.18905(YBX1),MSTRG.4689(MGST1),MSTRG.5042(Ralbp1),MSTRG.9260(Cdk8),ncbi_100037690(PCK1),ncbi_100048993(ANXA2),ncbi_100101231(COL3A1),ncbi_100125351(SQLE),ncbi_100127212(ST3GAL4),ncbi_100135440(RPL6),ncbi_100135448(ARNT2),ncbi_100144429(MCT7),ncbi_100144761(CDK6),ncbi_100144763(CCND1),ncbi_100145883(ARL1),ncbi_100170113(CYP1A1),ncbi_100170327(FASN),ncbi_100192423(ODC1),ncbi_100192429(HLF),ncb…
GO:0002376	immune system process	48	46	MSTRG.14833(IGHA2),MSTRG.19184(GBP2),MSTRG.5487(TRGC1),ncbi_100127218(AHSP),ncbi_100196903(IDO1),ncbi_101102931(C7),ncbi_101104226(C3AR1),ncbi_101104361(APOD),ncbi_101104734(PTPRO),ncbi_101108131(C3),ncbi_101108696(HLA-DQA2),ncbi_101108962(HLA-DQA2),ncbi_101109805(ZBTB1),ncbi_101110084(TRPM4),ncbi_101111126(IL7R),ncbi_101111234(IRF4),ncbi_101112041(MEIS1),ncbi_101112891(C4A),ncbi_101113203(VSIG4)…	ncbi_100101231(COL3A1),ncbi_100144761(CDK6),ncbi_100885768(TFRC),ncbi_101103068(SMAD6),ncbi_101103169(FLVCR1),ncbi_101103276(Ctps1),ncbi_101103410(Hes5),ncbi_101103648(NSD2),ncbi_101104160(TNFAIP1),ncbi_101105455(CD248),ncbi_101105541(ECM1),ncbi_101106679(PODXL),ncbi_101107210(SOX13),ncbi_101108206(TTC7A),ncbi_101108953(PDE4D),ncbi_101110289(TIPARP),ncbi_101110596(GPX2),ncbi_101110817(SLC7A2),ncb…
GO:0044699	single-organism process	229	370	MSTRG.14833(IGHA2),MSTRG.15496(--),MSTRG.19184(GBP2),MSTRG.5097(PABPC1),MSTRG.9092(--),ncbi_100034669(TAC1),ncbi_100125354(PLIN2),ncbi_100127218(AHSP),ncbi_100137067(FABP4),ncbi_100144423(CYP19A1),ncbi_100147780(SLC25A33),ncbi_100169699(LIPE),ncbi_100196903(IDO1),ncbi_100233164(CNGA3),ncbi_100302075(Rasd1),ncbi_100302558(ZFAND5),ncbi_100337686(PON3),ncbi_100820742(GPX1),ncbi_101101908(PLXDC2),ncb…	MSTRG.18905(YBX1),MSTRG.4689(MGST1),MSTRG.5042(Ralbp1),MSTRG.9260(Cdk8),ncbi_100037690(PCK1),ncbi_100048993(ANXA2),ncbi_100101231(COL3A1),ncbi_100125351(SQLE),ncbi_100125616(TNMD),ncbi_100135448(ARNT2),ncbi_100141299(CD9),ncbi_100144761(CDK6),ncbi_100144763(CCND1),ncbi_100145883(ARL1),ncbi_100170113(CYP1A1),ncbi_100170327(FASN),ncbi_100192423(ODC1),ncbi_100192429(HLF),ncbi_100216465(ATF4),ncbi_10…
GO:0048518	positive regulation of biological process	53	84	MSTRG.14833(IGHA2),MSTRG.5097(PABPC1),ncbi_100034669(TAC1),ncbi_100137067(FABP4),ncbi_100196903(IDO1),ncbi_100820742(GPX1),ncbi_101102931(C7),ncbi_101104226(C3AR1),ncbi_101105489(PAX8),ncbi_101105924(OSR2),ncbi_101106727(CD2),ncbi_101107094(ARRDC3),ncbi_101107288(EPHA7),ncbi_101107568(ATP1B3),ncbi_101108051(BMF),ncbi_101108131(C3),ncbi_101108688(CREBRF),ncbi_101108689(TAOK3),ncbi_101108867(IER3),…	MSTRG.18905(YBX1),ncbi_100048993(ANXA2),ncbi_100144761(CDK6),ncbi_100145883(ARL1),ncbi_100216465(ATF4),ncbi_100885762(GADD45G),ncbi_100885768(TFRC),ncbi_101102632(OSR1),ncbi_101103410(Hes5),ncbi_101103445(MTCL1),ncbi_101103648(NSD2),ncbi_101103741(METRNL),ncbi_101103762(CAMK1),ncbi_101103800(ROCK2),ncbi_101104033(PCOLCE),ncbi_101104393(SREBF2),ncbi_101104971(Fndc5),ncbi_101104991(FBN2),ncbi_10110…
GO:0007610	behavior	13	18	ncbi_100034669(TAC1),ncbi_100196903(IDO1),ncbi_101101920(SELENOP),ncbi_101102456(SLC24A2),ncbi_101102607(Neto1),ncbi_101104226(C3AR1),ncbi_101104734(PTPRO),ncbi_101104763(SLITRK5),ncbi_101106003(Prkar2b),ncbi_101106412(ASL),ncbi_101108688(CREBRF),ncbi_101114494(NR4A2),ncbi_101119037(MAPK8IP2)	ncbi_100422803(Pitx3),ncbi_101104118(NPTX2),ncbi_101107981(Tcf15),ncbi_101108953(PDE4D),ncbi_101112926(ADORA2A),ncbi_101113039(SNCG),ncbi_101113348(CNTN2),ncbi_101113711(RIN1),ncbi_101113844(GBX1),ncbi_101120093(CCL2),ncbi_101120619(TH),ncbi_101120960(PLA2G7),ncbi_101122928(EPHB2),ncbi_114112948(NTRK2),ncbi_443103(VEGFA),ncbi_443246(SLC1A3),ncbi_443534(LEP),ncbi_780465(NOD2)
GO:0051179	localization	81	155	MSTRG.14833(IGHA2),ncbi_100034669(TAC1),ncbi_100125354(PLIN2),ncbi_100137067(FABP4),ncbi_100147780(SLC25A33),ncbi_100233164(CNGA3),ncbi_100302558(ZFAND5),ncbi_101101923(SEC14L4),ncbi_101102456(SLC24A2),ncbi_101102489(CDO1),ncbi_101102607(Neto1),ncbi_101103232(RPL36),ncbi_101103249(SLC43A2),ncbi_101104046(SLC19A3),ncbi_101104226(C3AR1),ncbi_101104278(FYCO1),ncbi_101104361(APOD),ncbi_101104734(PTPR…	MSTRG.5042(Ralbp1),ncbi_100048993(ANXA2),ncbi_100101231(COL3A1),ncbi_100144763(CCND1),ncbi_100145883(ARL1),ncbi_100147785(SLC25A15),ncbi_100217405(SLC25A19),ncbi_100307048(SPARC),ncbi_100820746(ANKRD1),ncbi_100885768(TFRC),ncbi_101102076(SRCIN1),ncbi_101103014(ABHD2),ncbi_101103169(FLVCR1),ncbi_101103207(SYPL2),ncbi_101103371(Lrrc15),ncbi_101103435(SLC25A22),ncbi_101103475(SNX24),ncbi_101103501(G…
GO:0048519	negative regulation of biological process	45	75	MSTRG.15496(--),MSTRG.5097(PABPC1),ncbi_100137067(FABP4),ncbi_100196903(IDO1),ncbi_101103759(KDM2B),ncbi_101104361(APOD),ncbi_101104734(PTPRO),ncbi_101105489(PAX8),ncbi_101106003(Prkar2b),ncbi_101107094(ARRDC3),ncbi_101108051(BMF),ncbi_101108131(C3),ncbi_101108688(CREBRF),ncbi_101108689(TAOK3),ncbi_101108867(IER3),ncbi_101109245(HDAC6),ncbi_101109693(AMHR2),ncbi_101110819(RBM3),ncbi_101111126(IL7…	MSTRG.18905(YBX1),MSTRG.5042(Ralbp1),MSTRG.9260(Cdk8),ncbi_100048993(ANXA2),ncbi_100101231(COL3A1),ncbi_100144761(CDK6),ncbi_100144763(CCND1),ncbi_100216465(ATF4),ncbi_100820746(ANKRD1),ncbi_100885762(GADD45G),ncbi_101102599(PPP1R14B),ncbi_101103068(SMAD6),ncbi_101103371(Lrrc15),ncbi_101103410(Hes5),ncbi_101103741(METRNL),ncbi_101104341(Slit3),ncbi_101104393(SREBF2),ncbi_101104991(FBN2),ncbi_1011…
GO:0032501	multicellular organismal process	91	176	MSTRG.14833(IGHA2),MSTRG.15496(--),ncbi_100034669(TAC1),ncbi_100127218(AHSP),ncbi_100142676(FBXO32),ncbi_100196903(IDO1),ncbi_100233164(CNGA3),ncbi_100302558(ZFAND5),ncbi_101101908(PLXDC2),ncbi_101101920(SELENOP),ncbi_101102456(SLC24A2),ncbi_101102607(Neto1),ncbi_101103503(AMPD3),ncbi_101103759(KDM2B),ncbi_101104226(C3AR1),ncbi_101104361(APOD),ncbi_101104734(PTPRO),ncbi_101104763(SLITRK5),ncbi_10…	MSTRG.18905(YBX1),MSTRG.5042(Ralbp1),ncbi_100048993(ANXA2),ncbi_100101231(COL3A1),ncbi_100125616(TNMD),ncbi_100127212(ST3GAL4),ncbi_100135448(ARNT2),ncbi_100141299(CD9),ncbi_100144761(CDK6),ncbi_100144763(CCND1),ncbi_100192429(HLF),ncbi_100302348(PMP22),ncbi_100307048(SPARC),ncbi_100422803(Pitx3),ncbi_100820746(ANKRD1),ncbi_100885762(GADD45G),ncbi_100885768(TFRC),ncbi_101101900(FREM2),ncbi_101102…
GO:0098754	detoxification	1	0	ncbi_101117116(TXNRD3)	--
GO:0071840	cellular component organization or biogenesis	76	137	MSTRG.14833(IGHA2),ncbi_100034669(TAC1),ncbi_100147780(SLC25A33),ncbi_101102276(PMF1),ncbi_101103232(RPL36),ncbi_101103462(MGST1),ncbi_101103759(KDM2B),ncbi_101104361(APOD),ncbi_101104720(ARHGEF4),ncbi_101104734(PTPRO),ncbi_101104763(SLITRK5),ncbi_101105177(TGM3),ncbi_101105489(PAX8),ncbi_101106288(H1FX),ncbi_101106305(ADAMTS14),ncbi_101107288(EPHA7),ncbi_101107568(ATP1B3),ncbi_101107597(RPL10A),…	MSTRG.4689(MGST1),MSTRG.5042(Ralbp1),ncbi_100048993(ANXA2),ncbi_100101231(COL3A1),ncbi_100141299(CD9),ncbi_100145883(ARL1),ncbi_100302348(PMP22),ncbi_100307048(SPARC),ncbi_101102076(SRCIN1),ncbi_101102373(ZNF462),ncbi_101102801(C1qtnf6),ncbi_101103068(SMAD6),ncbi_101103371(Lrrc15),ncbi_101103410(Hes5),ncbi_101103445(MTCL1),ncbi_101103501(Grik5),ncbi_101103648(NSD2),ncbi_101103762(CAMK1),ncbi_1011…
GO:0099531	presynaptic process involved in synaptic transmission	1	0	ncbi_114113232(Rap1b)	--
GO:0001906	cell killing	1	2	ncbi_101111126(IL7R)	ncbi_101110963(PVR),ncbi_101118877(RIPK3)
GO:0000003	reproduction	13	27	ncbi_100144423(CYP19A1),ncbi_101101920(SELENOP),ncbi_101103759(KDM2B),ncbi_101108688(CREBRF),ncbi_101109693(AMHR2),ncbi_101112356(HIST1H1T),ncbi_101115906(PATZ1),ncbi_101119037(MAPK8IP2),ncbi_101119358(INPP5B),ncbi_101119519(TDRKH),ncbi_101120892(HMGB2),ncbi_443066(ESR2),ncbi_443515(IGF1R)	MSTRG.4689(MGST1),ncbi_100141299(CD9),ncbi_101102632(OSR1),ncbi_101103256(THBD),ncbi_101104341(Slit3),ncbi_101104939(PAQR8),ncbi_101106077(PCDH12),ncbi_101106132(Sox8),ncbi_101108445(CCT6A),ncbi_101109515(CITED1),ncbi_101110289(TIPARP),ncbi_101110875(TBX3),ncbi_101116417(SUV39H2),ncbi_101118116(Ybx2),ncbi_101118337(TNC),ncbi_101120619(TH),ncbi_101121861(HSF2),ncbi_101122217(CCT5),ncbi_101123293(A…
GO:0009987	cellular process	249	393	MSTRG.11228(--),MSTRG.14833(IGHA2),MSTRG.15496(--),MSTRG.19184(GBP2),MSTRG.5097(PABPC1),MSTRG.5487(TRGC1),ncbi_100034669(TAC1),ncbi_100137067(FABP4),ncbi_100142676(FBXO32),ncbi_100147780(SLC25A33),ncbi_100169699(LIPE),ncbi_100169937(FBXL3),ncbi_100196903(IDO1),ncbi_100233164(CNGA3),ncbi_100302075(Rasd1),ncbi_100302558(ZFAND5),ncbi_100337686(PON3),ncbi_100820742(GPX1),ncbi_101102276(PMF1),ncbi_101…	MSTRG.18905(YBX1),MSTRG.4689(MGST1),MSTRG.5042(Ralbp1),MSTRG.9260(Cdk8),ncbi_100037690(PCK1),ncbi_100048993(ANXA2),ncbi_100101231(COL3A1),ncbi_100125616(TNMD),ncbi_100127212(ST3GAL4),ncbi_100135448(ARNT2),ncbi_100141299(CD9),ncbi_100144761(CDK6),ncbi_100144763(CCND1),ncbi_100145883(ARL1),ncbi_100170113(CYP1A1),ncbi_100170327(FASN),ncbi_100187549(HPCAL1),ncbi_100192423(ODC1),ncbi_100192429(HLF),nc…
GO:0022414	reproductive process	12	27	ncbi_100144423(CYP19A1),ncbi_101103759(KDM2B),ncbi_101108688(CREBRF),ncbi_101109693(AMHR2),ncbi_101112356(HIST1H1T),ncbi_101115906(PATZ1),ncbi_101119037(MAPK8IP2),ncbi_101119358(INPP5B),ncbi_101119519(TDRKH),ncbi_101120892(HMGB2),ncbi_443066(ESR2),ncbi_443515(IGF1R)	MSTRG.4689(MGST1),ncbi_100141299(CD9),ncbi_101102632(OSR1),ncbi_101103256(THBD),ncbi_101104341(Slit3),ncbi_101104939(PAQR8),ncbi_101106077(PCDH12),ncbi_101106132(Sox8),ncbi_101108445(CCT6A),ncbi_101109515(CITED1),ncbi_101110289(TIPARP),ncbi_101110875(TBX3),ncbi_101116417(SUV39H2),ncbi_101118116(Ybx2),ncbi_101118337(TNC),ncbi_101120619(TH),ncbi_101121861(HSF2),ncbi_101122217(CCT5),ncbi_101123293(A…
GO:0050896	response to stimulus	115	191	MSTRG.14833(IGHA2),MSTRG.15496(--),MSTRG.19184(GBP2),ncbi_100034669(TAC1),ncbi_100137067(FABP4),ncbi_100142676(FBXO32),ncbi_100147780(SLC25A33),ncbi_100169937(FBXL3),ncbi_100196903(IDO1),ncbi_100302075(Rasd1),ncbi_100302558(ZFAND5),ncbi_100820742(GPX1),ncbi_101102489(CDO1),ncbi_101102607(Neto1),ncbi_101102930(Trim23),ncbi_101102931(C7),ncbi_101103279(GLMP),ncbi_101103462(MGST1),ncbi_101104226(C3A…	MSTRG.18905(YBX1),MSTRG.4689(MGST1),MSTRG.5042(Ralbp1),MSTRG.9260(Cdk8),ncbi_100037690(PCK1),ncbi_100048993(ANXA2),ncbi_100101231(COL3A1),ncbi_100141299(CD9),ncbi_100144761(CDK6),ncbi_100144763(CCND1),ncbi_100145883(ARL1),ncbi_100170113(CYP1A1),ncbi_100170327(FASN),ncbi_100192423(ODC1),ncbi_100216465(ATF4),ncbi_100307048(SPARC),ncbi_100820746(ANKRD1),ncbi_100885762(GADD45G),ncbi_101102228(CRHR2),…
GO:0048511	rhythmic process	2	3	ncbi_101106284(Ppp1cc),ncbi_101119104(RORC)	ncbi_100216465(ATF4),ncbi_101116417(SUV39H2),ncbi_114112948(NTRK2)
GO:0040007	growth	8	19	ncbi_100147780(SLC25A33),ncbi_101111126(IL7R),ncbi_101112949(STC1),ncbi_101113426(PRKCQ),ncbi_101114816(ACACB),ncbi_101123490(BBC3),ncbi_114113217(Erbb4),ncbi_443090(GPD2)	ncbi_101103169(FLVCR1),ncbi_101104341(Slit3),ncbi_101105128(ADAM15),ncbi_101106340(DCLK1),ncbi_101107225(GAS2L1),ncbi_101108953(PDE4D),ncbi_101109432(EMP1),ncbi_101112919(CCM2L),ncbi_101114095(ACVRL1),ncbi_101117554(TNFRSF12A),ncbi_101117812(STK40),ncbi_101120021(Sema7a),ncbi_101121656(HEG1),ncbi_114108599(CDC42),ncbi_443103(VEGFA),ncbi_443154(HYAL2),ncbi_443534(LEP),ncbi_497274(CRYAB),ncbi_78046…
GO:0044848	biological phase	2	0	ncbi_101106284(Ppp1cc),ncbi_101120209(UBE2D1)	--
GO:0051704	multi-organism process	22	33	MSTRG.14833(IGHA2),MSTRG.19184(GBP2),ncbi_100034669(TAC1),ncbi_100196903(IDO1),ncbi_101103232(RPL36),ncbi_101103759(KDM2B),ncbi_101107597(RPL10A),ncbi_101108688(CREBRF),ncbi_101111234(IRF4),ncbi_101112356(HIST1H1T),ncbi_101115906(PATZ1),ncbi_101117453(CCR5),ncbi_101119037(MAPK8IP2),ncbi_101119358(INPP5B),ncbi_101119519(TDRKH),ncbi_101120892(HMGB2),ncbi_101121603(JCHAIN),ncbi_114109518(RPL37A),ncb…	MSTRG.4689(MGST1),ncbi_100141299(CD9),ncbi_100144761(CDK6),ncbi_100192423(ODC1),ncbi_100307048(SPARC),ncbi_100820746(ANKRD1),ncbi_101103256(THBD),ncbi_101103371(Lrrc15),ncbi_101104939(PAQR8),ncbi_101106132(Sox8),ncbi_101106340(DCLK1),ncbi_101108412(MATN4),ncbi_101108445(CCT6A),ncbi_101108953(PDE4D),ncbi_101109515(CITED1),ncbi_101110596(GPX2),ncbi_101115261(DDX60),ncbi_101115754(HSPB1),ncbi_101118…
GO:0023052	signaling	75	126	MSTRG.14833(IGHA2),MSTRG.15496(--),MSTRG.19184(GBP2),ncbi_100034669(TAC1),ncbi_100147780(SLC25A33),ncbi_100302075(Rasd1),ncbi_100302558(ZFAND5),ncbi_101102456(SLC24A2),ncbi_101102607(Neto1),ncbi_101102930(Trim23),ncbi_101103279(GLMP),ncbi_101104226(C3AR1),ncbi_101104361(APOD),ncbi_101104720(ARHGEF4),ncbi_101104734(PTPRO),ncbi_101105348(SLC44A2),ncbi_101105489(PAX8),ncbi_101106284(Ppp1cc),ncbi_101…	MSTRG.18905(YBX1),MSTRG.9260(Cdk8),ncbi_100101231(COL3A1),ncbi_100144761(CDK6),ncbi_100144763(CCND1),ncbi_100145883(ARL1),ncbi_100820746(ANKRD1),ncbi_100885762(GADD45G),ncbi_101102228(CRHR2),ncbi_101102282(GLIS2),ncbi_101103068(SMAD6),ncbi_101103410(Hes5),ncbi_101103501(Grik5),ncbi_101103800(ROCK2),ncbi_101104118(NPTX2),ncbi_101104160(TNFAIP1),ncbi_101104341(Slit3),ncbi_101104473(RND1),ncbi_10110…
GO:0065007	biological regulation	159	280	MSTRG.14833(IGHA2),MSTRG.15496(--),MSTRG.19184(GBP2),MSTRG.5097(PABPC1),MSTRG.5487(TRGC1),MSTRG.9092(--),ncbi_100034669(TAC1),ncbi_100125354(PLIN2),ncbi_100127218(AHSP),ncbi_100137067(FABP4),ncbi_100142676(FBXO32),ncbi_100147780(SLC25A33),ncbi_100169937(FBXL3),ncbi_100196903(IDO1),ncbi_100302075(Rasd1),ncbi_100302558(ZFAND5),ncbi_100820742(GPX1),ncbi_101101969(RASGRP3),ncbi_101102276(PMF1),ncbi_1…	MSTRG.18905(YBX1),MSTRG.5042(Ralbp1),MSTRG.9260(Cdk8),ncbi_100048993(ANXA2),ncbi_100101231(COL3A1),ncbi_100125616(TNMD),ncbi_100135448(ARNT2),ncbi_100144761(CDK6),ncbi_100144763(CCND1),ncbi_100145883(ARL1),ncbi_100187549(HPCAL1),ncbi_100192423(ODC1),ncbi_100192429(HLF),ncbi_100216465(ATF4),ncbi_100302348(PMP22),ncbi_100307048(SPARC),ncbi_100422803(Pitx3),ncbi_100820746(ANKRD1),ncbi_100885762(GADD…
GO:0050789	regulation of biological process	149	268	MSTRG.14833(IGHA2),MSTRG.15496(--),MSTRG.19184(GBP2),MSTRG.5097(PABPC1),MSTRG.5487(TRGC1),MSTRG.9092(--),ncbi_100034669(TAC1),ncbi_100137067(FABP4),ncbi_100142676(FBXO32),ncbi_100147780(SLC25A33),ncbi_100196903(IDO1),ncbi_100302075(Rasd1),ncbi_100302558(ZFAND5),ncbi_100820742(GPX1),ncbi_101101969(RASGRP3),ncbi_101102276(PMF1),ncbi_101102288(CCNB3),ncbi_101102423(PLCXD3),ncbi_101102456(SLC24A2),nc…	MSTRG.18905(YBX1),MSTRG.5042(Ralbp1),MSTRG.9260(Cdk8),ncbi_100048993(ANXA2),ncbi_100101231(COL3A1),ncbi_100125616(TNMD),ncbi_100135448(ARNT2),ncbi_100144761(CDK6),ncbi_100144763(CCND1),ncbi_100145883(ARL1),ncbi_100187549(HPCAL1),ncbi_100192423(ODC1),ncbi_100192429(HLF),ncbi_100216465(ATF4),ncbi_100302348(PMP22),ncbi_100307048(SPARC),ncbi_100422803(Pitx3),ncbi_100820746(ANKRD1),ncbi_100885762(GADD…
GO:0005488	binding	215	344	MSTRG.14833(IGHA2),MSTRG.15496(--),MSTRG.19184(GBP2),MSTRG.5097(PABPC1),MSTRG.5487(TRGC1),MSTRG.9092(--),ncbi_100034669(TAC1),ncbi_100127218(AHSP),ncbi_100137067(FABP4),ncbi_100144423(CYP19A1),ncbi_100169699(LIPE),ncbi_100196903(IDO1),ncbi_100233164(CNGA3),ncbi_100302075(Rasd1),ncbi_100302558(ZFAND5),ncbi_100337686(PON3),ncbi_100913152(HSPA1B),ncbi_101101920(SELENOP),ncbi_101101969(RASGRP3),ncbi_…	MSTRG.18905(YBX1),MSTRG.4689(MGST1),MSTRG.5042(Ralbp1),MSTRG.9260(Cdk8),ncbi_100037690(PCK1),ncbi_100048993(ANXA2),ncbi_100101231(COL3A1),ncbi_100125351(SQLE),ncbi_100135440(RPL6),ncbi_100135448(ARNT2),ncbi_100141299(CD9),ncbi_100144761(CDK6),ncbi_100144763(CCND1),ncbi_100145883(ARL1),ncbi_100170113(CYP1A1),ncbi_100170327(FASN),ncbi_100187549(HPCAL1),ncbi_100192423(ODC1),ncbi_100192429(HLF),ncbi_…
GO:0003824	catalytic activity	134	166	MSTRG.11228(--),MSTRG.15496(--),MSTRG.19184(GBP2),ncbi_100144423(CYP19A1),ncbi_100169699(LIPE),ncbi_100196903(IDO1),ncbi_100337686(PON3),ncbi_100820742(GPX1),ncbi_101102423(PLCXD3),ncbi_101102434(ME3),ncbi_101102489(CDO1),ncbi_101102930(Trim23),ncbi_101103462(MGST1),ncbi_101103503(AMPD3),ncbi_101104150(SOD3),ncbi_101104165(FMO3),ncbi_101104407(ACOT2),ncbi_101104734(PTPRO),ncbi_101104842(FMO2),ncb…	MSTRG.4689(MGST1),MSTRG.5042(Ralbp1),MSTRG.9260(Cdk8),ncbi_100037690(PCK1),ncbi_100125351(SQLE),ncbi_100127212(ST3GAL4),ncbi_100144429(MCT7),ncbi_100144761(CDK6),ncbi_100144763(CCND1),ncbi_100145883(ARL1),ncbi_100170113(CYP1A1),ncbi_100170327(FASN),ncbi_100192423(ODC1),ncbi_101102121(TRMT9B),ncbi_101102235(ADAMTS19),ncbi_101102324(METTL18),ncbi_101102455(PIGA),ncbi_101102504(MMP23),ncbi_101102525…
GO:0016209	antioxidant activity	3	2	ncbi_100820742(GPX1),ncbi_101103462(MGST1),ncbi_101104150(SOD3)	MSTRG.4689(MGST1),ncbi_101110596(GPX2)
GO:0001071	nucleic acid binding transcription factor activity	16	31	ncbi_101103279(GLMP),ncbi_101105489(PAX8),ncbi_101108688(CREBRF),ncbi_101111234(IRF4),ncbi_101111519(RFX3),ncbi_101112041(MEIS1),ncbi_101114494(NR4A2),ncbi_101114500(NR0B2),ncbi_101117084(Tbx18),ncbi_101117396(KLF7),ncbi_101119104(RORC),ncbi_101120892(HMGB2),ncbi_101123641(KLF5),ncbi_443066(ESR2),ncbi_443082(IRF2),ncbi_443218(FOS)	MSTRG.18905(YBX1),ncbi_100135448(ARNT2),ncbi_100192429(HLF),ncbi_100216465(ATF4),ncbi_100422803(Pitx3),ncbi_101102282(GLIS2),ncbi_101103068(SMAD6),ncbi_101103410(Hes5),ncbi_101104393(SREBF2),ncbi_101106132(Sox8),ncbi_101106963(E2F4),ncbi_101109328(SIM2),ncbi_101110829(Six2),ncbi_101110875(TBX3),ncbi_101111137(Fosl1),ncbi_101111783(TLE4),ncbi_101112462(MTA1),ncbi_101113882(CREB3L1),ncbi_101113931(…
GO:0098772	molecular function regulator	13	25	ncbi_101101969(RASGRP3),ncbi_101104720(ARHGEF4),ncbi_101106003(Prkar2b),ncbi_101107429(WBP11),ncbi_101108131(C3),ncbi_101111820(Wnk4),ncbi_101113095(SCN3B),ncbi_101114193(RASGEF1B),ncbi_101116189(BCCIP),ncbi_101119037(MAPK8IP2),ncbi_114108624(PDCD1LG2),ncbi_114113232(Rap1b),ncbi_654403(TXNIP)	MSTRG.5042(Ralbp1),ncbi_100048993(ANXA2),ncbi_100144763(CCND1),ncbi_100145883(ARL1),ncbi_101102599(PPP1R14B),ncbi_101104033(PCOLCE),ncbi_101105817(ARHGEF5),ncbi_101108412(MATN4),ncbi_101109187(PI15),ncbi_101110137(VAV2),ncbi_101113622(SCN4B),ncbi_101115754(HSPB1),ncbi_101116818(Gpsm1),ncbi_101120047(RASGEF1A),ncbi_101121961(TNNI3),ncbi_101122097(DAB2IP),ncbi_101122234(CDC42EP2),ncbi_101122471(PI1…
GO:0045182	translation regulator activity	2	0	MSTRG.5097(PABPC1),ncbi_101117758(CIRBP)	--
GO:0000988	transcription factor activity, protein binding	6	14	ncbi_101102276(PMF1),ncbi_101103279(GLMP),ncbi_101108012(HDAC4),ncbi_101114500(NR0B2),ncbi_101119334(JADE1),ncbi_101122936(CALCOCO1)	ncbi_100144763(CCND1),ncbi_100820746(ANKRD1),ncbi_101107740(LMCD1),ncbi_101109515(CITED1),ncbi_101111783(TLE4),ncbi_101112462(MTA1),ncbi_101113861(MED4),ncbi_101115081(Rcor2),ncbi_101118525(TLE2),ncbi_101119132(AEBP1),ncbi_101119343(HEYL),ncbi_101120812(LOXL2),ncbi_101122913(CITED4),ncbi_101123385(ABRA)
GO:0005198	structural molecule activity	4	11	ncbi_101103232(RPL36),ncbi_101107597(RPL10A),ncbi_114109518(RPL37A),ncbi_114114874(RPL23)	ncbi_100101231(COL3A1),ncbi_101107777(COL5A1),ncbi_101107864(COMP),ncbi_101109291(PKP1),ncbi_101114493(COL5A2),ncbi_101115552(COL4A1),ncbi_101117548(COL11A1),ncbi_101120326(TUBA1B),ncbi_443483(COL1A1),ncbi_443512(COL1A2),ncbi_497274(CRYAB)
GO:0005215	transporter activity	14	26	ncbi_100147780(SLC25A33),ncbi_100233164(CNGA3),ncbi_101102456(SLC24A2),ncbi_101103249(SLC43A2),ncbi_101107449(SLC2A12),ncbi_101107568(ATP1B3),ncbi_101110084(TRPM4),ncbi_101113095(SCN3B),ncbi_101114337(TRPM6),ncbi_101116241(GJC1),ncbi_101120439(SLC43A1),ncbi_101123425(SV2A),ncbi_114115623(TOMM20),ncbi_443278(UCP3)	ncbi_100048993(ANXA2),ncbi_101103169(FLVCR1),ncbi_101103435(SLC25A22),ncbi_101103501(Grik5),ncbi_101105033(SLC6A6),ncbi_101105592(Jph2),ncbi_101110817(SLC7A2),ncbi_101112110(Ttyh3),ncbi_101113622(SCN4B),ncbi_101116017(SLC39A14),ncbi_101116675(CACNG7),ncbi_101118140(CLIC1),ncbi_101118297(SLC7A10),ncbi_101118547(SLC2A10),ncbi_101120365(MFSD2A),ncbi_101120568(SLC35B4),ncbi_101123388(KCNJ12),ncbi_101…
GO:0060089	molecular transducer activity	23	36	MSTRG.14833(IGHA2),MSTRG.15496(--),MSTRG.5487(TRGC1),ncbi_100233164(CNGA3),ncbi_101104226(C3AR1),ncbi_101107288(EPHA7),ncbi_101109693(AMHR2),ncbi_101111126(IL7R),ncbi_101113935(UNC5C),ncbi_101114494(NR4A2),ncbi_101114500(NR0B2),ncbi_101114623(CYSLTR2),ncbi_101115976(GCGR),ncbi_101117453(CCR5),ncbi_101118670(EDA2R),ncbi_101119104(RORC),ncbi_101119307(CFI),ncbi_101120910(HMOX1),ncbi_443066(ESR2),nc…	ncbi_100135448(ARNT2),ncbi_100885768(TFRC),ncbi_101102228(CRHR2),ncbi_101103501(Grik5),ncbi_101105541(ECM1),ncbi_101106801(PLXND1),ncbi_101108683(TUB),ncbi_101108913(CRLF1),ncbi_101109291(PKP1),ncbi_101109328(SIM2),ncbi_101112926(ADORA2A),ncbi_101113579(CALCR),ncbi_101113861(MED4),ncbi_101113931(NR2F6),ncbi_101114095(ACVRL1),ncbi_101114557(NPR3),ncbi_101116615(ESRRA),ncbi_101117380(LOXL4),ncbi_10…
GO:0004871	signal transducer activity	20	23	MSTRG.14833(IGHA2),MSTRG.5487(TRGC1),ncbi_101104226(C3AR1),ncbi_101107288(EPHA7),ncbi_101109693(AMHR2),ncbi_101111126(IL7R),ncbi_101113935(UNC5C),ncbi_101114494(NR4A2),ncbi_101114500(NR0B2),ncbi_101114623(CYSLTR2),ncbi_101115976(GCGR),ncbi_101117453(CCR5),ncbi_101118670(EDA2R),ncbi_101119104(RORC),ncbi_101120665(MAPK10),ncbi_443066(ESR2),ncbi_443111(CCR3),ncbi_443515(IGF1R),ncbi_554257(TLR6),ncbi…	ncbi_101102228(CRHR2),ncbi_101103068(SMAD6),ncbi_101106801(PLXND1),ncbi_101108683(TUB),ncbi_101112926(ADORA2A),ncbi_101113579(CALCR),ncbi_101113931(NR2F6),ncbi_101114095(ACVRL1),ncbi_101114557(NPR3),ncbi_101116615(ESRRA),ncbi_101117990(ADGRA2),ncbi_101118356(Adgrl1),ncbi_101118613(SORCS2),ncbi_101118877(RIPK3),ncbi_101120781(BDKRB2),ncbi_101120886(EPHB4),ncbi_101121464(ADGRF1),ncbi_101122042(Gpr1…
GO:0031012	extracellular matrix	2	40	ncbi_101106305(ADAMTS14),ncbi_101122429(LAMC3)	ncbi_100048993(ANXA2),ncbi_100101231(COL3A1),ncbi_100307048(SPARC),ncbi_101101900(FREM2),ncbi_101102235(ADAMTS19),ncbi_101103811(FBN3),ncbi_101104991(FBN2),ncbi_101105076(ADAMTS10),ncbi_101105836(MYOC),ncbi_101107101(NID2),ncbi_101107282(FRAS1),ncbi_101107777(COL5A1),ncbi_101107864(COMP),ncbi_101107969(LAMA4),ncbi_101107994(ADAMTS16),ncbi_101110624(ADAMTS17),ncbi_101111037(FMOD),ncbi_101111183(AD…
GO:0044420	extracellular matrix component	1	20	ncbi_101122429(LAMC3)	ncbi_100048993(ANXA2),ncbi_100101231(COL3A1),ncbi_100307048(SPARC),ncbi_101101900(FREM2),ncbi_101107101(NID2),ncbi_101107282(FRAS1),ncbi_101107777(COL5A1),ncbi_101107969(LAMA4),ncbi_101114493(COL5A2),ncbi_101115457(COL5A3),ncbi_101115552(COL4A1),ncbi_101115805(COL4A2),ncbi_101118337(TNC),ncbi_101119261(COL7A1),ncbi_101121399(FREM1),ncbi_101121444(LAMA5),ncbi_101122067(CCDC80),ncbi_105610011(USH2A…
GO:0005576	extracellular region	21	63	MSTRG.14833(IGHA2),MSTRG.15496(--),ncbi_100034669(TAC1),ncbi_101101920(SELENOP),ncbi_101104150(SOD3),ncbi_101104361(APOD),ncbi_101108131(C3),ncbi_101108502(ALDH3A1),ncbi_101112891(C4A),ncbi_101112949(STC1),ncbi_101113122(CD5L),ncbi_101114153(TNFSF10),ncbi_101116876(DKK1),ncbi_101117297(CCL26),ncbi_101119307(CFI),ncbi_101119334(JADE1),ncbi_101120892(HMGB2),ncbi_101121603(JCHAIN),ncbi_101121925(ADA…	ncbi_100048993(ANXA2),ncbi_100101231(COL3A1),ncbi_100141299(CD9),ncbi_100307048(SPARC),ncbi_100885768(TFRC),ncbi_101102801(C1qtnf6),ncbi_101103741(METRNL),ncbi_101104033(PCOLCE),ncbi_101104187(MDGA1),ncbi_101104341(Slit3),ncbi_101105154(KCP),ncbi_101105541(ECM1),ncbi_101105836(MYOC),ncbi_101106679(PODXL),ncbi_101107282(FRAS1),ncbi_101107740(LMCD1),ncbi_101107777(COL5A1),ncbi_101107864(COMP),ncbi_…
GO:0044421	extracellular region part	20	63	MSTRG.14833(IGHA2),ncbi_100034669(TAC1),ncbi_101101920(SELENOP),ncbi_101104150(SOD3),ncbi_101104361(APOD),ncbi_101108131(C3),ncbi_101108502(ALDH3A1),ncbi_101112891(C4A),ncbi_101112949(STC1),ncbi_101113122(CD5L),ncbi_101114153(TNFSF10),ncbi_101116876(DKK1),ncbi_101117297(CCL26),ncbi_101119307(CFI),ncbi_101119334(JADE1),ncbi_101120892(HMGB2),ncbi_101121603(JCHAIN),ncbi_101121925(ADA2),ncbi_10112341…	ncbi_100048993(ANXA2),ncbi_100101231(COL3A1),ncbi_100141299(CD9),ncbi_100307048(SPARC),ncbi_100885768(TFRC),ncbi_101102801(C1qtnf6),ncbi_101103741(METRNL),ncbi_101104033(PCOLCE),ncbi_101104187(MDGA1),ncbi_101104341(Slit3),ncbi_101105154(KCP),ncbi_101105541(ECM1),ncbi_101105836(MYOC),ncbi_101106679(PODXL),ncbi_101107282(FRAS1),ncbi_101107740(LMCD1),ncbi_101107777(COL5A1),ncbi_101107864(COMP),ncbi_…
GO:0030054	cell junction	13	40	MSTRG.5097(PABPC1),MSTRG.9092(--),ncbi_101106284(Ppp1cc),ncbi_101106727(CD2),ncbi_101107597(RPL10A),ncbi_101111820(Wnk4),ncbi_101116241(GJC1),ncbi_101117550(CGN),ncbi_101121871(SKAP1),ncbi_101123425(SV2A),ncbi_114109518(RPL37A),ncbi_114113232(Rap1b),ncbi_114114874(RPL23)	ncbi_100135440(RPL6),ncbi_100141299(CD9),ncbi_100144763(CCND1),ncbi_100180629(TSPAN9),ncbi_100302348(PMP22),ncbi_100302564(PLAUR),ncbi_101104473(RND1),ncbi_101104593(Enah),ncbi_101105140(ZNF185),ncbi_101105550(COL13A1),ncbi_101105848(HYOU1),ncbi_101106077(PCDH12),ncbi_101106589(SPRY4),ncbi_101107643(GJA4),ncbi_101109291(PKP1),ncbi_101109342(SLC9A3R2),ncbi_101109631(FBLIM1),ncbi_101110963(PVR),ncb…
GO:0044215	other organism	1	0	MSTRG.19184(GBP2)	--
GO:0044217	other organism part	1	0	MSTRG.19184(GBP2)	--
GO:0045202	synapse	4	10	ncbi_101102607(Neto1),ncbi_101108012(HDAC4),ncbi_101119037(MAPK8IP2),ncbi_101123425(SV2A)	ncbi_101103501(Grik5),ncbi_101109602(OLFM1),ncbi_101110839(KCTD16),ncbi_101115445(ITGA7),ncbi_101118356(Adgrl1),ncbi_101119518(IGSF9B),ncbi_101122119(PCDH8),ncbi_106991220(DOK7),ncbi_114112948(NTRK2),ncbi_443453(CAMK2A)
GO:0016020	membrane	119	207	MSTRG.14833(IGHA2),MSTRG.15496(--),MSTRG.19184(GBP2),MSTRG.5487(TRGC1),ncbi_100034669(TAC1),ncbi_100125354(PLIN2),ncbi_100147780(SLC25A33),ncbi_100169699(LIPE),ncbi_100233164(CNGA3),ncbi_101101908(PLXDC2),ncbi_101101923(SEC14L4),ncbi_101102456(SLC24A2),ncbi_101102607(Neto1),ncbi_101102930(Trim23),ncbi_101103249(SLC43A2),ncbi_101103279(GLMP),ncbi_101103462(MGST1),ncbi_101103615(MOSPD3),ncbi_101104…	MSTRG.18905(YBX1),MSTRG.4689(MGST1),ncbi_100048993(ANXA2),ncbi_100125351(SQLE),ncbi_100127212(ST3GAL4),ncbi_100141299(CD9),ncbi_100145883(ARL1),ncbi_100147785(SLC25A15),ncbi_100170113(CYP1A1),ncbi_100170327(FASN),ncbi_100180629(TSPAN9),ncbi_100216465(ATF4),ncbi_100217405(SLC25A19),ncbi_100302348(PMP22),ncbi_100302564(PLAUR),ncbi_100307048(SPARC),ncbi_100885768(TFRC),ncbi_101101900(FREM2),ncbi_101…
GO:0099512	supramolecular fiber	3	6	ncbi_101109245(HDAC6),ncbi_101120765(KLHL21),ncbi_105606262(DCXR)	ncbi_101106451(SNPH),ncbi_101111554(ACTC1),ncbi_101113081(MTUS2),ncbi_101113319(Krt80),ncbi_101120243(LMNB2),ncbi_101120326(TUBA1B)
GO:0044425	membrane part	92	154	MSTRG.14833(IGHA2),MSTRG.15496(--),MSTRG.5487(TRGC1),ncbi_100147780(SLC25A33),ncbi_100169699(LIPE),ncbi_100233164(CNGA3),ncbi_101101908(PLXDC2),ncbi_101101923(SEC14L4),ncbi_101102456(SLC24A2),ncbi_101102607(Neto1),ncbi_101103249(SLC43A2),ncbi_101103279(GLMP),ncbi_101103462(MGST1),ncbi_101103615(MOSPD3),ncbi_101104165(FMO3),ncbi_101104226(C3AR1),ncbi_101104278(FYCO1),ncbi_101104301(TMEM35A),ncbi_1…	MSTRG.4689(MGST1),ncbi_100048993(ANXA2),ncbi_100125351(SQLE),ncbi_100127212(ST3GAL4),ncbi_100141299(CD9),ncbi_100147785(SLC25A15),ncbi_100180629(TSPAN9),ncbi_100217405(SLC25A19),ncbi_100302348(PMP22),ncbi_100302564(PLAUR),ncbi_100885768(TFRC),ncbi_101101900(FREM2),ncbi_101102228(CRHR2),ncbi_101102320(Sec14l1),ncbi_101102807(CD320),ncbi_101103014(ABHD2),ncbi_101103169(FLVCR1),ncbi_101103207(SYPL2)…
GO:0044456	synapse part	3	6	ncbi_101102607(Neto1),ncbi_101119037(MAPK8IP2),ncbi_101123425(SV2A)	ncbi_101109602(OLFM1),ncbi_101110839(KCTD16),ncbi_101118356(Adgrl1),ncbi_101122119(PCDH8),ncbi_114112948(NTRK2),ncbi_443453(CAMK2A)
GO:0019012	virion	0	1	--	ncbi_101117969(IMP3)
GO:0044423	virion part	0	1	--	ncbi_101117969(IMP3)
GO:0005623	cell	220	329	MSTRG.11228(--),MSTRG.14833(IGHA2),MSTRG.19184(GBP2),MSTRG.5097(PABPC1),MSTRG.9092(--),ncbi_100034669(TAC1),ncbi_100125354(PLIN2),ncbi_100127218(AHSP),ncbi_100137067(FABP4),ncbi_100142676(FBXO32),ncbi_100144423(CYP19A1),ncbi_100147780(SLC25A33),ncbi_100169699(LIPE),ncbi_100169937(FBXL3),ncbi_100196903(IDO1),ncbi_100233164(CNGA3),ncbi_100302558(ZFAND5),ncbi_100820742(GPX1),ncbi_101101923(SEC14L4),…	MSTRG.18905(YBX1),MSTRG.4689(MGST1),MSTRG.5042(Ralbp1),MSTRG.9260(Cdk8),ncbi_100048993(ANXA2),ncbi_100101231(COL3A1),ncbi_100127212(ST3GAL4),ncbi_100135440(RPL6),ncbi_100135448(ARNT2),ncbi_100141299(CD9),ncbi_100144761(CDK6),ncbi_100144763(CCND1),ncbi_100145883(ARL1),ncbi_100147785(SLC25A15),ncbi_100170113(CYP1A1),ncbi_100170327(FASN),ncbi_100180629(TSPAN9),ncbi_100192423(ODC1),ncbi_100192429(HLF…
GO:0044464	cell part	220	329	MSTRG.11228(--),MSTRG.14833(IGHA2),MSTRG.19184(GBP2),MSTRG.5097(PABPC1),MSTRG.9092(--),ncbi_100034669(TAC1),ncbi_100125354(PLIN2),ncbi_100127218(AHSP),ncbi_100137067(FABP4),ncbi_100142676(FBXO32),ncbi_100144423(CYP19A1),ncbi_100147780(SLC25A33),ncbi_100169699(LIPE),ncbi_100169937(FBXL3),ncbi_100196903(IDO1),ncbi_100233164(CNGA3),ncbi_100302558(ZFAND5),ncbi_100820742(GPX1),ncbi_101101923(SEC14L4),…	MSTRG.18905(YBX1),MSTRG.4689(MGST1),MSTRG.5042(Ralbp1),MSTRG.9260(Cdk8),ncbi_100048993(ANXA2),ncbi_100101231(COL3A1),ncbi_100127212(ST3GAL4),ncbi_100135440(RPL6),ncbi_100135448(ARNT2),ncbi_100141299(CD9),ncbi_100144761(CDK6),ncbi_100144763(CCND1),ncbi_100145883(ARL1),ncbi_100147785(SLC25A15),ncbi_100170113(CYP1A1),ncbi_100170327(FASN),ncbi_100180629(TSPAN9),ncbi_100192423(ODC1),ncbi_100192429(HLF…
GO:0043226	organelle	191	299	MSTRG.14833(IGHA2),MSTRG.19184(GBP2),MSTRG.5097(PABPC1),ncbi_100125354(PLIN2),ncbi_100137067(FABP4),ncbi_100142676(FBXO32),ncbi_100144423(CYP19A1),ncbi_100147780(SLC25A33),ncbi_100169699(LIPE),ncbi_100169937(FBXL3),ncbi_100196903(IDO1),ncbi_100233164(CNGA3),ncbi_100337686(PON3),ncbi_101101908(PLXDC2),ncbi_101101920(SELENOP),ncbi_101102276(PMF1),ncbi_101102288(CCNB3),ncbi_101102434(ME3),ncbi_10110…	MSTRG.18905(YBX1),MSTRG.4689(MGST1),MSTRG.9260(Cdk8),ncbi_100037690(PCK1),ncbi_100048993(ANXA2),ncbi_100101231(COL3A1),ncbi_100127212(ST3GAL4),ncbi_100135440(RPL6),ncbi_100135448(ARNT2),ncbi_100141299(CD9),ncbi_100144761(CDK6),ncbi_100144763(CCND1),ncbi_100145883(ARL1),ncbi_100147785(SLC25A15),ncbi_100170113(CYP1A1),ncbi_100170327(FASN),ncbi_100187549(HPCAL1),ncbi_100192429(HLF),ncbi_100216465(AT…
GO:0032991	macromolecular complex	63	87	MSTRG.14833(IGHA2),MSTRG.5097(PABPC1),ncbi_100169937(FBXL3),ncbi_101101969(RASGRP3),ncbi_101102276(PMF1),ncbi_101102607(Neto1),ncbi_101103232(RPL36),ncbi_101103759(KDM2B),ncbi_101104361(APOD),ncbi_101104763(SLITRK5),ncbi_101105489(PAX8),ncbi_101106227(SPTSSA),ncbi_101106284(Ppp1cc),ncbi_101107091(KLHL3),ncbi_101107597(RPL10A),ncbi_101108012(HDAC4),ncbi_101108696(HLA-DQA2),ncbi_101108962(HLA-DQA2)…	MSTRG.18905(YBX1),MSTRG.9260(Cdk8),ncbi_100101231(COL3A1),ncbi_100135440(RPL6),ncbi_100135448(ARNT2),ncbi_100144761(CDK6),ncbi_100144763(CCND1),ncbi_100216465(ATF4),ncbi_100820746(ANKRD1),ncbi_101103068(SMAD6),ncbi_101103800(ROCK2),ncbi_101104160(TNFAIP1),ncbi_101104254(DNAH2),ncbi_101104393(SREBF2),ncbi_101105713(PLK1),ncbi_101105853(NAA15),ncbi_101106005(HOOK2),ncbi_101106132(Sox8),ncbi_1011061…
GO:0031974	membrane-enclosed lumen	15	27	ncbi_101104499(FBXL4),ncbi_101105489(PAX8),ncbi_101106284(Ppp1cc),ncbi_101107429(WBP11),ncbi_101108688(CREBRF),ncbi_101109245(HDAC6),ncbi_101109397(HIST1H1D),ncbi_101109805(ZBTB1),ncbi_101112835(LIN9),ncbi_101113893(HIST1H1D),ncbi_101113972(CHD1L),ncbi_101114494(NR4A2),ncbi_101115990(SETD7),ncbi_101120209(UBE2D1),ncbi_101120892(HMGB2)	MSTRG.18905(YBX1),MSTRG.9260(Cdk8),ncbi_100216465(ATF4),ncbi_100307048(SPARC),ncbi_101102282(GLIS2),ncbi_101105292(CASQ2),ncbi_101105782(CHCHD4),ncbi_101105836(MYOC),ncbi_101108164(HSPB8),ncbi_101109291(PKP1),ncbi_101110518(PEX2),ncbi_101110829(Six2),ncbi_101112462(MTA1),ncbi_101113327(SIRT6),ncbi_101114109(Lsm11),ncbi_101116417(SUV39H2),ncbi_101116615(ESRRA),ncbi_101117372(Lsm2),ncbi_101118525(T…
GO:0044422	organelle part	69	117	MSTRG.19184(GBP2),MSTRG.5097(PABPC1),ncbi_100142676(FBXO32),ncbi_100147780(SLC25A33),ncbi_101102276(PMF1),ncbi_101102930(Trim23),ncbi_101103232(RPL36),ncbi_101103279(GLMP),ncbi_101103462(MGST1),ncbi_101104150(SOD3),ncbi_101104165(FMO3),ncbi_101104499(FBXL4),ncbi_101104842(FMO2),ncbi_101105089(FMO1),ncbi_101105348(SLC44A2),ncbi_101105489(PAX8),ncbi_101106003(Prkar2b),ncbi_101106227(SPTSSA),ncbi_10…	MSTRG.18905(YBX1),MSTRG.4689(MGST1),MSTRG.9260(Cdk8),ncbi_100048993(ANXA2),ncbi_100101231(COL3A1),ncbi_100127212(ST3GAL4),ncbi_100135440(RPL6),ncbi_100145883(ARL1),ncbi_100147785(SLC25A15),ncbi_100170113(CYP1A1),ncbi_100216465(ATF4),ncbi_100217405(SLC25A19),ncbi_100307048(SPARC),ncbi_100820746(ANKRD1),ncbi_101102282(GLIS2),ncbi_101102455(PIGA),ncbi_101103435(SLC25A22),ncbi_101103440(PPOX),ncbi_10…
