# Supplementary material for: Comparative Transcriptome Analysis Reveals the Mechanism Associated With Dynamic Changes in Meat Quality of the Longissimus Thoracis Muscle in Tibetan Sheep at Different Growth Stages
Source: Front Vet Sci. 2022 Jul 6;9:926725. doi: 10.3389/fvets.2022.926725 (PMC9298548; doi:10.3389/fvets.2022.926725)
Supplement: Supplementary Table 4 — The results of GO annotation in the contiguous period transcriptome comparative groups. [file Table_4.XLSX]

## Sheet: 4 m vs 1.5 y
Significant results of KEGG results in the 4 m vs 1.5 y
Pathway	A-vs-B (276)	All (8774)	Pvalue	Qvalue	Pathway ID	Genes
Measles	18	163	3.35e-06	0.000962333	ko05162	ncbi_100913152(HSPA1B);ncbi_101102057(CD209L2);ncbi_101103683(IRF7);ncbi_101107124(CCNE1);ncbi_101107257(DDX58);ncbi_101109915(OAS2);ncbi_101112122(OAS3);ncbi_101112844(HSPA8);ncbi_101113426(PRKCQ);ncbi_101123490(BBC3);ncbi_105602911(OAS1);ncbi_114108605(HSPA1B);ncbi_114108712(OAS1);ncbi_114112146(JAK1);ncbi_114118858(OAS2);ncbi_443419(STAT5A);MSTRG.14833(IGHA2);MSTRG.18415(HSPA8)
Herpes simplex infection	20	236	5.15e-05	0.00577215	ko05168	ncbi_100125623(PER3);ncbi_101102194(IFIT1);ncbi_101103683(IRF7);ncbi_101104866(HLA-A);ncbi_101107257(DDX58);ncbi_101107962(CDC34);ncbi_101109915(OAS2);ncbi_101112122(OAS3);ncbi_101113217(HLA-A);ncbi_101114076(GTF2IRD1);ncbi_101120392(BoLA-DQB);ncbi_101121244(SP140L);ncbi_105602911(OAS1);ncbi_106990117(HLA-B);ncbi_114108712(OAS1);ncbi_114112146(JAK1);ncbi_114118858(OAS2);ncbi_443218(FOS);ncbi_4432…
AMPK signaling pathway	14	131	6.03e-05	0.00577215	ko04152	ncbi_100037690(PCK1);ncbi_100169699(LIPE);ncbi_101107621(PFKFB3);ncbi_101113882(CREB3L1);ncbi_101114816(ACACB);ncbi_101119324(PFKFB2);ncbi_101121655(irs1);ncbi_106991367(IRS2);ncbi_443185(SCD);ncbi_443186(ACACA);ncbi_443434(CPT1A);ncbi_443534(LEP);MSTRG.16899(Ppp2r2d);MSTRG.8153(EEF2)
PPAR signaling pathway	10	91	0.00054692	0.0392415	ko03320	ncbi_100037690(PCK1);ncbi_100125354(PLIN2);ncbi_100137067(FABP4);ncbi_101115230(ubq-1);ncbi_101117635(EHHADH);ncbi_101117785(APOA1);ncbi_101121460(ACOX2);ncbi_443185(SCD);ncbi_443434(CPT1A);ncbi_443457(PPARA)
Adipocytokine signaling pathway	8	74	0.00216026	0.101659	ko04920	ncbi_100037690(PCK1);ncbi_101113426(PRKCQ);ncbi_101114816(ACACB);ncbi_101121655(irs1);ncbi_106991367(IRS2);ncbi_443434(CPT1A);ncbi_443457(PPARA);ncbi_443534(LEP)
Antigen processing and presentation	9	93	0.0025258	0.101659	ko04612	ncbi_100913152(HSPA1B);ncbi_101104866(HLA-A);ncbi_101112844(HSPA8);ncbi_101113217(HLA-A);ncbi_101120392(BoLA-DQB);ncbi_106990117(HLA-B);ncbi_114108605(HSPA1B);ncbi_114114906(CALR);MSTRG.18415(HSPA8)
Influenza A	15	210	0.00254857	0.101659	ko05164	ncbi_100913152(HSPA1B);ncbi_101103683(IRF7);ncbi_101107257(DDX58);ncbi_101109915(OAS2);ncbi_101112122(OAS3);ncbi_101112844(HSPA8);ncbi_101115013(RSAD2);ncbi_101120392(BoLA-DQB);ncbi_105602911(OAS1);ncbi_114108605(HSPA1B);ncbi_114108712(OAS1);ncbi_114112146(JAK1);ncbi_114113694(RSAD2);ncbi_114118858(OAS2);MSTRG.18415(HSPA8)
Hepatitis C	12	151	0.00283371	0.101659	ko05160	ncbi_101102194(IFIT1);ncbi_101103683(IRF7);ncbi_101107257(DDX58);ncbi_101109915(OAS2);ncbi_101112122(OAS3);ncbi_105602911(OAS1);ncbi_114108712(OAS1);ncbi_114112146(JAK1);ncbi_114118858(OAS2);ncbi_443457(PPARA);ncbi_443535(LDLR);MSTRG.16899(Ppp2r2d)
Phagosome	13	180	0.00440661	0.129284	ko04145	ncbi_100192433(FCGR3);ncbi_101102057(CD209L2);ncbi_101104057(ATP6V0A4);ncbi_101104866(HLA-A);ncbi_101107864(COMP);ncbi_101113217(HLA-A);ncbi_101120326(TUBA1B);ncbi_101120392(BoLA-DQB);ncbi_101122020(ATP6V0E2);ncbi_105608393(VAMP3);ncbi_106990117(HLA-B);ncbi_114114906(CALR);MSTRG.14833(IGHA2)
Longevity regulating pathway - multiple species	7	66	0.00450466	0.129284	ko04213	ncbi_100913152(HSPA1B);ncbi_101112844(HSPA8);ncbi_101121655(irs1);ncbi_101122401(ADCY9);ncbi_106991367(IRS2);ncbi_114108605(HSPA1B);MSTRG.18415(HSPA8)
Prion diseases	5	37	0.00567568	0.148084	ko05020	ncbi_100913152(HSPA1B);ncbi_101112844(HSPA8);ncbi_114108605(HSPA1B);ncbi_443547(EGR1);MSTRG.18415(HSPA8)
Amphetamine addiction	7	70	0.00623589	0.149142	ko05031	ncbi_100568292(DRD1);ncbi_101113882(CREB3L1);ncbi_101117101(FOSB);ncbi_101120169(Arc);ncbi_105614854(calm);ncbi_443218(FOS);ncbi_443273(Gria3)
Regulation of lipolysis in adipocyte	6	56	0.00796766	0.155633	ko04923	ncbi_100137067(FABP4);ncbi_100169699(LIPE);ncbi_101120029(PLA2G16);ncbi_101121655(irs1);ncbi_101122401(ADCY9);ncbi_106991367(IRS2)
Drug metabolism - other enzymes	8	92	0.00822295	0.155633	ko00983	ncbi_101102070(DPYS);ncbi_101109670(Uck2);ncbi_101109730(CES2);ncbi_101116336(CES1);ncbi_114117877(Ces1d);ncbi_114117878(Ces1d);ncbi_780499(XDH);MSTRG.4689(MGST1)
Proximal tubule bicarbonate reclamation	4	26	0.00829507	0.155633	ko04964	ncbi_100037690(PCK1);ncbi_101116182(SLC38A3);ncbi_114115243(SLC4A4);ncbi_494440(SLC4A4)
Fatty acid metabolism	6	57	0.00867643	0.155633	ko01212	ncbi_101117635(EHHADH);ncbi_101118274(ELOVL6);ncbi_443185(SCD);ncbi_443186(ACACA);ncbi_443434(CPT1A);ncbi_443484(HACD1)
NOD-like receptor signaling pathway	13	197	0.00924271	0.156039	ko04621	ncbi_101103683(IRF7);ncbi_101109915(OAS2);ncbi_101110450(NAIP);ncbi_101112122(OAS3);ncbi_101112936(IFI16);ncbi_101117406(GABARAPL1);ncbi_105602911(OAS1);ncbi_114108712(OAS1);ncbi_114112146(JAK1);ncbi_114115617(GBP2);ncbi_114118858(OAS2);ncbi_654403(TXNIP);MSTRG.19184(GBP2)
Biosynthesis of unsaturated fatty acids	4	28	0.0108167	0.172466	ko01040	ncbi_101104407(ACOT2);ncbi_101118274(ELOVL6);ncbi_443185(SCD);ncbi_443484(HACD1)
FoxO signaling pathway	10	139	0.0121728	0.183873	ko04068	ncbi_100037690(PCK1);ncbi_100142676(FBXO32);ncbi_101105713(PLK1);ncbi_101107709(SGK1);ncbi_101110594(CCNG2);ncbi_101115990(SETD7);ncbi_101117406(GABARAPL1);ncbi_101121655(irs1);ncbi_101123434(Foxo6);ncbi_106991367(IRS2)
Circadian rhythm - fly	2	6	0.0136011	0.195176	ko04711	ncbi_443259(PER2);ncbi_443262(ARNTL)
Circadian rhythm	4	31	0.0154464	0.2111	ko04710	ncbi_100125623(PER3);ncbi_101119104(RORC);ncbi_443259(PER2);ncbi_443262(ARNTL)
Metabolic pathways	58	1420	0.0189141	0.246743	ko01100	ncbi_100037690(PCK1);ncbi_100125351(SQLE);ncbi_100170113(CYP1A1);ncbi_101102070(DPYS);ncbi_101103031(AK4);ncbi_101103503(AMPD3);ncbi_101104057(ATP6V0A4);ncbi_101104407(ACOT2);ncbi_101104856(P4HA3);ncbi_101106412(ASL);ncbi_101106450(LPIN3);ncbi_101106812(ST3GAL6);ncbi_101106995(LSS);ncbi_101107260(PRODH);ncbi_101108052(HDC);ncbi_101108502(ALDH3A1);ncbi_101109216(FAH);ncbi_101109366(SYNJ2);ncbi_101…
Parathyroid hormone synthesis, secretion and action	8	108	0.0202912	0.253199	ko04928	ncbi_101108953(PDE4D);ncbi_101113882(CREB3L1);ncbi_101114494(NR4A2);ncbi_101122213(MMP15);ncbi_101122401(ADCY9);ncbi_443135(PTHLH);ncbi_443218(FOS);ncbi_443547(EGR1)
African trypanosomiasis	5	51	0.0214536	0.25655	ko05143	ncbi_101106266(F2RL1);ncbi_101113636(VCAM1);ncbi_101117785(APOA1);ncbi_101121414(APOL3);MSTRG.14833(IGHA2)
Epstein-Barr virus infection	13	226	0.0260883	0.299494	ko05169	ncbi_100913152(HSPA1B);ncbi_101104866(HLA-A);ncbi_101107257(DDX58);ncbi_101112844(HSPA8);ncbi_101113217(HLA-A);ncbi_101120392(BoLA-DQB);ncbi_106990117(HLA-B);ncbi_114108605(HSPA1B);ncbi_114112146(JAK1);ncbi_114115250(CD38);ncbi_443447(MYC);MSTRG.14833(IGHA2);MSTRG.18415(HSPA8)
Ovarian Steroidogenesis	5	55	0.0287327	0.317165	ko04913	ncbi_100170113(CYP1A1);ncbi_101104407(ACOT2);ncbi_101121563(CYP2J2);ncbi_101122401(ADCY9);ncbi_443535(LDLR)
Thyroid hormone synthesis	6	75	0.0302399	0.321439	ko04918	ncbi_100820742(GPX1);ncbi_101105489(PAX8);ncbi_101110596(GPX2);ncbi_101111972(DUOX1);ncbi_101113882(CREB3L1);ncbi_101122401(ADCY9)
Circadian entrainment	7	98	0.0344657	0.353274	ko04713	ncbi_100125623(PER3);ncbi_100302075(Rasd1);ncbi_101122401(ADCY9);ncbi_105614854(calm);ncbi_443218(FOS);ncbi_443259(PER2);ncbi_443273(Gria3)
Apelin signaling pathway	9	143	0.0363316	0.354621	ko04371	ncbi_100169699(LIPE);ncbi_100381267(SERPINE1);ncbi_101110290(MRAS);ncbi_101117406(GABARAPL1);ncbi_101122401(ADCY9);ncbi_105603910(MYLK4);ncbi_105614854(calm);ncbi_443058(SPP1);ncbi_443547(EGR1)
Glycosaminoglycan biosynthesis - heparan sulfate / heparin	3	24	0.038259	0.354621	ko00534	ncbi_101113394(EXTL1);ncbi_101115079(Extl2);ncbi_101116370(HS3ST2)
Th17 cell differentiation	8	122	0.038304	0.354621	ko04659	ncbi_101111234(IRF4);ncbi_101113426(PRKCQ);ncbi_101119104(RORC);ncbi_101120392(BoLA-DQB);ncbi_114112146(JAK1);ncbi_114113806(IL4R);ncbi_443218(FOS);ncbi_443419(STAT5A)
HTLV-I infection	15	292	0.0422468	0.376916	ko05166	ncbi_101104866(HLA-A);ncbi_101110290(MRAS);ncbi_101113217(HLA-A);ncbi_101113636(VCAM1);ncbi_101114236(Fzd9);ncbi_101120392(BoLA-DQB);ncbi_101122401(ADCY9);ncbi_101122407(EGR2);ncbi_106990117(HLA-B);ncbi_114112146(JAK1);ncbi_114114906(CALR);ncbi_443218(FOS);ncbi_443419(STAT5A);ncbi_443447(MYC);ncbi_443547(EGR1)
Cellular senescence	10	171	0.0433388	0.376916	ko04218	ncbi_100381267(SERPINE1);ncbi_101104866(HLA-A);ncbi_101107124(CCNE1);ncbi_101110290(MRAS);ncbi_101112835(LIN9);ncbi_101113178(CDC25A);ncbi_101113217(HLA-A);ncbi_105614854(calm);ncbi_106990117(HLA-B);ncbi_443447(MYC)
Transcriptional misregulation in cancers	11	197	0.0465066	0.389796	ko05202	ncbi_100135448(ARNT2);ncbi_101105489(PAX8);ncbi_101105814(MYCN);ncbi_101110344(ETV4);ncbi_101112041(MEIS1);ncbi_101115050(SLC45A3);ncbi_106991578(MAF);ncbi_443259(PER2);ncbi_443273(Gria3);ncbi_443447(MYC);MSTRG.14833(IGHA2)
Allograft rejection	5	63	0.0475361	0.389796	ko05330	ncbi_101104866(HLA-A);ncbi_101113217(HLA-A);ncbi_101120392(BoLA-DQB);ncbi_106990117(HLA-B);MSTRG.14833(IGHA2)
Th1 and Th2 cell differentiation	7	106	0.0493082	0.393096	ko04658	ncbi_101113426(PRKCQ);ncbi_101120392(BoLA-DQB);ncbi_106991578(MAF);ncbi_114112146(JAK1);ncbi_114113806(IL4R);ncbi_443218(FOS);ncbi_443419(STAT5A)
Glucagon signaling pathway	7	109	0.0557785	0.429716	ko04922	ncbi_100037690(PCK1);ncbi_101113882(CREB3L1);ncbi_101114816(ACACB);ncbi_105614854(calm);ncbi_443186(ACACA);ncbi_443434(CPT1A);ncbi_443457(PPARA)
Toxoplasmosis	8	133	0.0583516	0.429716	ko05145	ncbi_100913152(HSPA1B);ncbi_101112844(HSPA8);ncbi_101120392(BoLA-DQB);ncbi_106991782(--);ncbi_114108605(HSPA1B);ncbi_114112146(JAK1);ncbi_443535(LDLR);MSTRG.18415(HSPA8)
p53 signaling pathway	6	88	0.0583935	0.429716	ko04115	ncbi_100381267(SERPINE1);ncbi_101107124(CCNE1);ncbi_101110594(CCNG2);ncbi_101115970(SESN1);ncbi_101122263(EI24);ncbi_101123490(BBC3)
Oxytocin signaling pathway	9	158	0.0613285	0.4365	ko04921	ncbi_101103800(ROCK2);ncbi_101110925(Myl6b);ncbi_101122401(ADCY9);ncbi_101123388(KCNJ12);ncbi_105603910(MYLK4);ncbi_105614854(calm);ncbi_114115250(CD38);ncbi_443218(FOS);MSTRG.8153(EEF2)
Type II diabetes mellitus	4	48	0.0633407	0.4365	ko04930	ncbi_101121655(irs1);ncbi_101122774(CACNA1B);ncbi_106991336(Mafa);ncbi_106991367(IRS2)
Insulin resistance	7	113	0.0651929	0.4365	ko04931	ncbi_100037690(PCK1);ncbi_101113426(PRKCQ);ncbi_101113882(CREB3L1);ncbi_101114816(ACACB);ncbi_106991367(IRS2);ncbi_443434(CPT1A);ncbi_443457(PPARA)
Autophagy - animal	8	137	0.0670284	0.4365	ko04140	ncbi_101110290(MRAS);ncbi_101113426(PRKCQ);ncbi_101115063(ATG13);ncbi_101117406(GABARAPL1);ncbi_101119220(ATG14);ncbi_101121655(irs1);ncbi_101123304(DAPK3);ncbi_106991367(IRS2)
Dopaminergic synapse	8	137	0.0670284	0.4365	ko04728	ncbi_100568292(DRD1);ncbi_101113882(CREB3L1);ncbi_101122774(CACNA1B);ncbi_105614854(calm);ncbi_443218(FOS);ncbi_443262(ARNTL);ncbi_443273(Gria3);MSTRG.16899(Ppp2r2d)
Longevity regulating pathway - mammal	6	92	0.0694207	0.4365	ko04211	ncbi_101113882(CREB3L1);ncbi_101115063(ATG13);ncbi_101115970(SESN1);ncbi_101121655(irs1);ncbi_101122401(ADCY9);ncbi_106991367(IRS2)
Fatty acid biosynthesis	2	14	0.0699617	0.4365	ko00061	ncbi_101114816(ACACB);ncbi_443186(ACACA)
Staphylococcus aureus infection	6	93	0.0723536	0.441819	ko05150	ncbi_100192433(FCGR3);ncbi_101115321(C2);ncbi_101119307(CFI);ncbi_101120392(BoLA-DQB);ncbi_101123419(C4A);MSTRG.14833(IGHA2)
Estrogen signaling pathway	8	140	0.0740328	0.442655	ko04915	ncbi_100913152(HSPA1B);ncbi_101112844(HSPA8);ncbi_101113882(CREB3L1);ncbi_101122401(ADCY9);ncbi_105614854(calm);ncbi_114108605(HSPA1B);ncbi_443218(FOS);MSTRG.18415(HSPA8)
Legionellosis	5	73	0.0793	0.459845	ko05134	ncbi_100913152(HSPA1B);ncbi_101110450(NAIP);ncbi_101112844(HSPA8);ncbi_114108605(HSPA1B);MSTRG.18415(HSPA8)
Vibrio cholerae infection	4	52	0.0801123	0.459845	ko05110	ncbi_101104057(ATP6V0A4);ncbi_101121418(KDELR3);ncbi_101122020(ATP6V0E2);ncbi_101122401(ADCY9)
Arginine and proline metabolism	4	53	0.0846176	0.462104	ko00330	ncbi_101104856(P4HA3);ncbi_101107260(PRODH);ncbi_101116374(P4HA1);ncbi_101123553(P4HA2)
Sphingolipid metabolism	4	53	0.0846176	0.462104	ko00600	ncbi_101110257(SPTLC3);ncbi_101119496(Smpd3);ncbi_101122252(CERS6);ncbi_114117545(SPTLC3)
Hepatitis B	9	169	0.0853363	0.462104	ko05161	ncbi_101103683(IRF7);ncbi_101107124(CCNE1);ncbi_101107257(DDX58);ncbi_101113882(CREB3L1);ncbi_101122407(EGR2);ncbi_114112146(JAK1);ncbi_443218(FOS);ncbi_443419(STAT5A);ncbi_443447(MYC)
Aldosterone synthesis and secretion	6	99	0.0914176	0.485868	ko04925	ncbi_100169699(LIPE);ncbi_101113882(CREB3L1);ncbi_101114494(NR4A2);ncbi_101122401(ADCY9);ncbi_105614854(calm);ncbi_443535(LDLR)

## Sheet: 1.5 y vs 3.5 y
Significant results of KEGG results in the 1.5 y vs 3.5 y
Pathway	B-vs-C (85)	All (8774)	Pvalue	Qvalue	Pathway ID	Genes
Herpes simplex infection	11	236	1.55853e-05	0.00321057	ko05168	ncbi_100125623(PER3);ncbi_100294595(SOCS3);ncbi_101102194(IFIT1);ncbi_101103683(IRF7);ncbi_101109915(OAS2);ncbi_101118514(BoLA-DQB);ncbi_101120392(BoLA-DQB);ncbi_105602911(OAS1);ncbi_443259(PER2);ncbi_443262(ARNTL);ncbi_494547(TLR9)
Hepatitis C	8	151	0.000100325	0.0103335	ko05160	ncbi_100294595(SOCS3);ncbi_101102194(IFIT1);ncbi_101103683(IRF7);ncbi_101109915(OAS2);ncbi_101121229(CLDN15);ncbi_101123247(PIK3R3);ncbi_105602911(OAS1);ncbi_780477(CLDN4)
Influenza A	9	210	0.000184994	0.0108898	ko05164	ncbi_100294595(SOCS3);ncbi_101103683(IRF7);ncbi_101107064(HSPA6);ncbi_101109915(OAS2);ncbi_101118514(BoLA-DQB);ncbi_101120392(BoLA-DQB);ncbi_101123247(PIK3R3);ncbi_105602911(OAS1);MSTRG.18415(HSPA8)
Circadian rhythm	4	31	0.000211452	0.0108898	ko04710	ncbi_100125623(PER3);ncbi_101104483(PRKAG2);ncbi_443259(PER2);ncbi_443262(ARNTL)
Measles	7	163	0.000983063	0.0391956	ko05162	ncbi_101103683(IRF7);ncbi_101107064(HSPA6);ncbi_101109915(OAS2);ncbi_101123247(PIK3R3);ncbi_105602911(OAS1);ncbi_494547(TLR9);MSTRG.18415(HSPA8)
Type II diabetes mellitus	4	48	0.00115389	0.0391956	ko04930	ncbi_100294595(SOCS3);ncbi_101111848(ADIPOQ);ncbi_101115017(SOCS2);ncbi_101123247(PIK3R3)
Circadian rhythm - fly	2	6	0.00135663	0.0391956	ko04711	ncbi_443259(PER2);ncbi_443262(ARNTL)
Leukocyte transendothelial migration	6	129	0.00152216	0.0391956	ko04670	ncbi_101112196(RAPGEF4);ncbi_101113636(VCAM1);ncbi_101118074(Myl10);ncbi_101121229(CLDN15);ncbi_101123247(PIK3R3);ncbi_780477(CLDN4)
Drug metabolism - other enzymes	5	92	0.00192603	0.0396762	ko00983	ncbi_100037663(Gstm5);ncbi_101103462(MGST1);ncbi_101109730(CES2);ncbi_106990219(GSTM1);MSTRG.4689(MGST1)
Platinum drug resistance	5	92	0.00192603	0.0396762	ko01524	ncbi_100037663(Gstm5);ncbi_101103462(MGST1);ncbi_101123247(PIK3R3);ncbi_106990219(GSTM1);MSTRG.4689(MGST1)

## Sheet: 3.5 y vs 6 y
Significant results of KEGG results in the 3.5 y vs 6 y
Pathway	C-vs-D (109)	All (8774)	Pvalue	Qvalue	Pathway ID	Genes
Cell adhesion molecules (CAMs)	8	170	0.00121529	0.274657	ko04514	ncbi_101106374(HLA-A);ncbi_101110963(PVR);ncbi_101113348(CNTN2);ncbi_101113636(VCAM1);ncbi_101119747(CDH1);ncbi_101121229(CLDN15);ncbi_105603928(BoLA-DQB);ncbi_780477(CLDN4)
Insulin resistance	6	113	0.00275958	0.311832	ko04931	ncbi_100329218(SREBF1);ncbi_101104483(PRKAG2);ncbi_101112976(CREB5);ncbi_101115503(Mlxipl);ncbi_101118797(SLC2A4);ncbi_101121915(RPS6KA6)
Carbohydrate digestion and absorption	3	48	0.0215235	0.745368	ko04973	ncbi_101107690(HK2);ncbi_114108606(SLC2A5);ncbi_114117869(ATP1B3)
Cocaine addiction	3	49	0.0227246	0.745368	ko05030	ncbi_100568292(DRD1);ncbi_101112976(CREB5);ncbi_101118179(GRIN2B)
Platinum drug resistance	4	92	0.0273473	0.745368	ko01524	ncbi_100302083(CDKN1A);ncbi_101103462(MGST1);ncbi_101110067(REV3L);MSTRG.4689(MGST1)
Parathyroid hormone synthesis, secretion and action	4	108	0.0452043	0.745368	ko04928	ncbi_100302083(CDKN1A);ncbi_101108953(PDE4D);ncbi_101111757(PDE4B);ncbi_101112976(CREB5)

## Sheet: 4 m vs 6 y
Significant results of KEGG results in the 4 m vs 6 y
Pathway	A-vs-D (487)	All (8774)	Pvalue	Qvalue	Pathway ID	Genes
Axon guidance	24	191	0.000139331	0.0413027	ko04360	ncbi_101103800(ROCK2);ncbi_101104341(Slit3);ncbi_101104473(RND1);ncbi_101104593(Enah);ncbi_101107068(UNC5B);ncbi_101107288(EPHA7);ncbi_101109148(UNC5D);ncbi_101111299(SSH2);ncbi_101111591(SEMA6C);ncbi_101111869(DPYSL5);ncbi_101113935(UNC5C);ncbi_101115152(PAK4);ncbi_101116446(NTN3);ncbi_101118946(UNC5A);ncbi_101120021(Sema7a);ncbi_101120886(EPHB4);ncbi_101121716(SEMA3B);ncbi_101122043(PLXNA2);ncb…
ECM-receptor interaction	15	97	0.000269073	0.0413027	ko04512	ncbi_101106837(SDC1);ncbi_101107864(COMP);ncbi_101107969(LAMA4);ncbi_101115445(ITGA7);ncbi_101115552(COL4A1);ncbi_101115805(COL4A2);ncbi_101117377(ITGA10);ncbi_101118337(TNC);ncbi_101121444(LAMA5);ncbi_101122429(LAMC3);ncbi_101123425(SV2A);ncbi_443051(COL6A3);ncbi_443058(SPP1);ncbi_443483(COL1A1);ncbi_443512(COL1A2)
Focal adhesion	25	220	0.000491249	0.0502712	ko04510	ncbi_100144763(CCND1);ncbi_101103800(ROCK2);ncbi_101106284(Ppp1cc);ncbi_101107864(COMP);ncbi_101107969(LAMA4);ncbi_101110137(VAV2);ncbi_101115152(PAK4);ncbi_101115445(ITGA7);ncbi_101115552(COL4A1);ncbi_101115805(COL4A2);ncbi_101117377(ITGA10);ncbi_101118337(TNC);ncbi_101120665(MAPK10);ncbi_101121444(LAMA5);ncbi_101122429(LAMC3);ncbi_101123247(PIK3R3);ncbi_114108599(CDC42);ncbi_114113232(Rap1b);nc…
Complement and coagulation cascades	13	92	0.00160662	0.079361	ko04610	ncbi_100302564(PLAUR);ncbi_101102931(C7);ncbi_101103256(THBD);ncbi_101104226(C3AR1);ncbi_101108131(C3);ncbi_101112891(C4A);ncbi_101113203(VSIG4);ncbi_101115321(C2);ncbi_101119307(CFI);ncbi_101120781(BDKRB2);ncbi_101121454(SERPING1);ncbi_101122940(A2M);ncbi_101123419(C4A)
Protein digestion and absorption	17	139	0.00172412	0.079361	ko04974	ncbi_100101231(COL3A1);ncbi_101105550(COL13A1);ncbi_101106802(COL21A1);ncbi_101107568(ATP1B3);ncbi_101107777(COL5A1);ncbi_101111152(ELN);ncbi_101114493(COL5A2);ncbi_101115457(COL5A3);ncbi_101115552(COL4A1);ncbi_101115805(COL4A2);ncbi_101117548(COL11A1);ncbi_101119261(COL7A1);ncbi_101119401(COL22A1);ncbi_114117869(ATP1B3);ncbi_443051(COL6A3);ncbi_443483(COL1A1);ncbi_443512(COL1A2)
Antigen processing and presentation	13	93	0.00177574	0.079361	ko04612	ncbi_100913152(HSPA1B);ncbi_101106374(HLA-A);ncbi_101108171(HLA-A);ncbi_101108696(HLA-DQA2);ncbi_101108962(HLA-DQA2);ncbi_101112844(HSPA8);ncbi_101113217(HLA-A);ncbi_101118514(BoLA-DQB);ncbi_101122782(HSPA4);ncbi_106990117(HLA-B);ncbi_114108605(HSPA1B);ncbi_114108675(HLA-A);ncbi_114114906(CALR)
Metabolic pathways	103	1420	0.00180953	0.079361	ko01100	ncbi_100037690(PCK1);ncbi_100125351(SQLE);ncbi_100127212(ST3GAL4);ncbi_100144423(CYP19A1);ncbi_100170113(CYP1A1);ncbi_100170327(FASN);ncbi_100192423(ODC1);ncbi_100196903(IDO1);ncbi_101102245(MTHFD1L);ncbi_101102380(Mat2a);ncbi_101102434(ME3);ncbi_101102455(PIGA);ncbi_101102489(CDO1);ncbi_101102559(CERS4);ncbi_101102696(QPRT);ncbi_101102764(GMPPB);ncbi_101103276(Ctps1);ncbi_101103440(PPOX);ncbi_10…
Phagosome	20	180	0.00229365	0.0859117	ko04145	ncbi_100192433(FCGR3);ncbi_100885768(TFRC);ncbi_101106094(NCF2);ncbi_101106374(HLA-A);ncbi_101106730(FCGR2);ncbi_101107864(COMP);ncbi_101108131(C3);ncbi_101108171(HLA-A);ncbi_101108696(HLA-DQA2);ncbi_101108962(HLA-DQA2);ncbi_101112461(Stx12);ncbi_101113217(HLA-A);ncbi_101118514(BoLA-DQB);ncbi_101120326(TUBA1B);ncbi_101122020(ATP6V0E2);ncbi_106990117(HLA-B);ncbi_114108675(HLA-A);ncbi_114114906(CAL…
Proximal tubule bicarbonate reclamation	6	26	0.00251858	0.0859117	ko04964	ncbi_100037690(PCK1);ncbi_100147800(SLC25A10);ncbi_101107568(ATP1B3);ncbi_101116182(SLC38A3);ncbi_114117869(ATP1B3);ncbi_494440(SLC4A4)
Glutathione metabolism	10	65	0.00287888	0.0883815	ko00480	ncbi_100192423(ODC1);ncbi_100820742(GPX1);ncbi_101103462(MGST1);ncbi_101104387(CHAC2);ncbi_101107401(GSTM1);ncbi_101110596(GPX2);ncbi_101114872(CHAC1);ncbi_106990219(GSTM1);ncbi_443054(GSTA2);MSTRG.4689(MGST1)
FoxO signaling pathway	16	139	0.00429871	0.119973	ko04068	ncbi_100037690(PCK1);ncbi_100142676(FBXO32);ncbi_100144763(CCND1);ncbi_100885762(GADD45G);ncbi_101102288(CCNB3);ncbi_101105713(PLK1);ncbi_101110594(CCNG2);ncbi_101111126(IL7R);ncbi_101114153(TNFSF10);ncbi_101115990(SETD7);ncbi_101117406(GABARAPL1);ncbi_101120665(MAPK10);ncbi_101123247(PIK3R3);ncbi_101123434(Foxo6);ncbi_106991367(IRS2);ncbi_443515(IGF1R)
Staphylococcus aureus infection	12	93	0.0051306	0.130668	ko05150	ncbi_100192433(FCGR3);ncbi_101104226(C3AR1);ncbi_101106730(FCGR2);ncbi_101108131(C3);ncbi_101108696(HLA-DQA2);ncbi_101108962(HLA-DQA2);ncbi_101112891(C4A);ncbi_101115321(C2);ncbi_101118514(BoLA-DQB);ncbi_101119307(CFI);ncbi_101123419(C4A);MSTRG.14833(IGHA2)
AMPK signaling pathway	15	131	0.00588543	0.130668	ko04152	ncbi_100037690(PCK1);ncbi_100144763(CCND1);ncbi_100169699(LIPE);ncbi_100170327(FASN);ncbi_101107621(PFKFB3);ncbi_101108919(HMGCR);ncbi_101113882(CREB3L1);ncbi_101114816(ACACB);ncbi_101123247(PIK3R3);ncbi_106991367(IRS2);ncbi_443185(SCD);ncbi_443186(ACACA);ncbi_443515(IGF1R);ncbi_443534(LEP);MSTRG.16899(Ppp2r2d)
cAMP signaling pathway	23	236	0.0059588	0.130668	ko04024	ncbi_100169699(LIPE);ncbi_100233164(CNGA3);ncbi_100568292(DRD1);ncbi_101103800(ROCK2);ncbi_101106284(Ppp1cc);ncbi_101107568(ATP1B3);ncbi_101108321(ABCC4);ncbi_101108953(PDE4D);ncbi_101109370(ABCC4);ncbi_101110137(VAV2);ncbi_101111248(ADCY10);ncbi_101112926(ADORA2A);ncbi_101113882(CREB3L1);ncbi_101118179(GRIN2B);ncbi_101120665(MAPK10);ncbi_101121961(TNNI3);ncbi_101122401(ADCY9);ncbi_101123247(PIK3…
Steroid biosynthesis	5	23	0.00755003	0.139292	ko00100	ncbi_100125351(SQLE);ncbi_101106995(LSS);ncbi_101113583(CYP51A1);ncbi_101117786(CYP2R1);ncbi_101121628(MSMO1)
Allograft rejection	9	63	0.00755843	0.139292	ko05330	ncbi_101106374(HLA-A);ncbi_101108171(HLA-A);ncbi_101108696(HLA-DQA2);ncbi_101108962(HLA-DQA2);ncbi_101113217(HLA-A);ncbi_101118514(BoLA-DQB);ncbi_106990117(HLA-B);ncbi_114108675(HLA-A);MSTRG.14833(IGHA2)
Viral myocarditis	11	86	0.00771324	0.139292	ko05416	ncbi_100144763(CCND1);ncbi_101106374(HLA-A);ncbi_101108171(HLA-A);ncbi_101108696(HLA-DQA2);ncbi_101108962(HLA-DQA2);ncbi_101113217(HLA-A);ncbi_101117527(CYCS);ncbi_101118514(BoLA-DQB);ncbi_106990117(HLA-B);ncbi_114108675(HLA-A);MSTRG.14833(IGHA2)
Aldosterone synthesis and secretion	12	99	0.00843799	0.143915	ko04925	ncbi_100169699(LIPE);ncbi_100216465(ATF4);ncbi_101103762(CAMK1);ncbi_101107568(ATP1B3);ncbi_101109927(Dagla);ncbi_101113882(CREB3L1);ncbi_101114494(NR4A2);ncbi_101116101(KCNJ5);ncbi_101122401(ADCY9);ncbi_114117869(ATP1B3);ncbi_443453(CAMK2A);ncbi_443535(LDLR)
Proteoglycans in cancer	22	232	0.00963169	0.155628	ko05205	ncbi_100144763(CCND1);ncbi_100302564(PLAUR);ncbi_101101932(FZD4);ncbi_101103800(ROCK2);ncbi_101106284(Ppp1cc);ncbi_101106802(COL21A1);ncbi_101106837(SDC1);ncbi_101110137(VAV2);ncbi_101110290(MRAS);ncbi_101114236(Fzd9);ncbi_101118185(HBEGF);ncbi_101122654(TFAP4);ncbi_101123247(PIK3R3);ncbi_105602066(CD63);ncbi_114108599(CDC42);ncbi_114113217(Erbb4);ncbi_443075(HGF);ncbi_443103(VEGFA);ncbi_443453(C…
AGE-RAGE signaling pathway in diabetic complications	13	114	0.0103169	0.158364	ko04933	ncbi_100101231(COL3A1);ncbi_100144763(CCND1);ncbi_101103256(THBD);ncbi_101115552(COL4A1);ncbi_101115805(COL4A2);ncbi_101120093(CCL2);ncbi_101120665(MAPK10);ncbi_101123247(PIK3R3);ncbi_114108599(CDC42);ncbi_443077(NOS3);ncbi_443103(VEGFA);ncbi_443483(COL1A1);ncbi_443512(COL1A2)
Bile secretion	14	129	0.0120588	0.176287	ko04976	ncbi_101105660(Kcnn2);ncbi_101107568(ATP1B3);ncbi_101108321(ABCC4);ncbi_101108919(HMGCR);ncbi_101109370(ABCC4);ncbi_101111038(EPHX1);ncbi_101114500(NR0B2);ncbi_101119972(SLCO1A2);ncbi_101122401(ADCY9);ncbi_114114475(ABCB1);ncbi_114117869(ATP1B3);ncbi_443268(AQP4);ncbi_443535(LDLR);ncbi_494440(SLC4A4)
Human papillomavirus infection	32	391	0.0171753	0.234411	ko05165	ncbi_100144761(CDK6);ncbi_100144763(CCND1);ncbi_101101932(FZD4);ncbi_101103410(Hes5);ncbi_101106374(HLA-A);ncbi_101107864(COMP);ncbi_101107969(LAMA4);ncbi_101108012(HDAC4);ncbi_101108171(HLA-A);ncbi_101109245(HDAC6);ncbi_101113217(HLA-A);ncbi_101113882(CREB3L1);ncbi_101114236(Fzd9);ncbi_101115445(ITGA7);ncbi_101115552(COL4A1);ncbi_101115805(COL4A2);ncbi_101117377(ITGA10);ncbi_101118337(TNC);ncbi_…
Biosynthesis of unsaturated fatty acids	5	28	0.0175618	0.234411	ko01040	ncbi_101104407(ACOT2);ncbi_101118274(ELOVL6);ncbi_101121789(ACOT7);ncbi_443185(SCD);ncbi_443484(HACD1)
Insulin resistance	12	113	0.0225078	0.275149	ko04931	ncbi_100037690(PCK1);ncbi_101105403(PTPA);ncbi_101106284(Ppp1cc);ncbi_101111588(PTPRF);ncbi_101113426(PRKCQ);ncbi_101113882(CREB3L1);ncbi_101114816(ACACB);ncbi_101115503(Mlxipl);ncbi_101120665(MAPK10);ncbi_101123247(PIK3R3);ncbi_106991367(IRS2);ncbi_443077(NOS3)
Fluid shear stress and atherosclerosis	15	153	0.022557	0.275149	ko05418	ncbi_101103256(THBD);ncbi_101103462(MGST1);ncbi_101106094(NCF2);ncbi_101106837(SDC1);ncbi_101107401(GSTM1);ncbi_101120093(CCL2);ncbi_101120665(MAPK10);ncbi_101120910(HMOX1);ncbi_101123247(PIK3R3);ncbi_106990219(GSTM1);ncbi_443054(GSTA2);ncbi_443077(NOS3);ncbi_443103(VEGFA);ncbi_443218(FOS);MSTRG.4689(MGST1)
Pathways in cancer	43	571	0.0240422	0.275149	ko05200	ncbi_100135448(ARNT2);ncbi_100144761(CDK6);ncbi_100144763(CCND1);ncbi_100885762(GADD45G);ncbi_101101932(FZD4);ncbi_101101969(RASGRP3);ncbi_101103410(Hes5);ncbi_101103462(MGST1);ncbi_101103800(ROCK2);ncbi_101105489(PAX8);ncbi_101107401(GSTM1);ncbi_101107969(LAMA4);ncbi_101111126(IL7R);ncbi_101114236(Fzd9);ncbi_101115552(COL4A1);ncbi_101115805(COL4A2);ncbi_101117116(TXNRD3);ncbi_101117527(CYCS);ncb…
Drug metabolism - cytochrome P450	9	76	0.0241988	0.275149	ko00982	ncbi_101103462(MGST1);ncbi_101104165(FMO3);ncbi_101104842(FMO2);ncbi_101105089(FMO1);ncbi_101107401(GSTM1);ncbi_101108502(ALDH3A1);ncbi_106990219(GSTM1);ncbi_443054(GSTA2);MSTRG.4689(MGST1)
Arginine and proline metabolism	7	53	0.0261914	0.281419	ko00330	ncbi_100192423(ODC1);ncbi_101107260(PRODH);ncbi_101110851(AMD1);ncbi_101113161(PYCR1);ncbi_101123553(P4HA2);ncbi_443077(NOS3);ncbi_780468(ARG2)
Cell adhesion molecules (CAMs)	16	170	0.0265836	0.281419	ko04514	ncbi_101106374(HLA-A);ncbi_101106727(CD2);ncbi_101106837(SDC1);ncbi_101108171(HLA-A);ncbi_101108696(HLA-DQA2);ncbi_101108962(HLA-DQA2);ncbi_101110963(PVR);ncbi_101111588(PTPRF);ncbi_101113217(HLA-A);ncbi_101113348(CNTN2);ncbi_101118005(CNTN1);ncbi_101118514(BoLA-DQB);ncbi_101120588(NLGN2);ncbi_106990117(HLA-B);ncbi_114108624(PDCD1LG2);ncbi_114108675(HLA-A)
Longevity regulating pathway - multiple species	8	66	0.0288299	0.288244	ko04213	ncbi_100913152(HSPA1B);ncbi_101112844(HSPA8);ncbi_101122401(ADCY9);ncbi_101123247(PIK3R3);ncbi_106991367(IRS2);ncbi_114108605(HSPA1B);ncbi_443515(IGF1R);ncbi_497274(CRYAB)
Oxytocin signaling pathway	15	158	0.0291061	0.288244	ko04921	ncbi_100144763(CCND1);ncbi_101103762(CAMK1);ncbi_101103800(ROCK2);ncbi_101106197(KCNJ14);ncbi_101106284(Ppp1cc);ncbi_101110925(Myl6b);ncbi_101115165(CACNA2D2);ncbi_101116101(KCNJ5);ncbi_101116675(CACNG7);ncbi_101122401(ADCY9);ncbi_101123388(KCNJ12);ncbi_443077(NOS3);ncbi_443163(RGS2);ncbi_443218(FOS);ncbi_443453(CAMK2A)
Autoimmune thyroid disease	9	79	0.0302474	0.290186	ko05320	ncbi_101106374(HLA-A);ncbi_101108171(HLA-A);ncbi_101108696(HLA-DQA2);ncbi_101108962(HLA-DQA2);ncbi_101113217(HLA-A);ncbi_101118514(BoLA-DQB);ncbi_106990117(HLA-B);ncbi_114108675(HLA-A);MSTRG.14833(IGHA2)
Ovarian Steroidogenesis	7	55	0.031386	0.291985	ko04913	ncbi_100144423(CYP19A1);ncbi_100170113(CYP1A1);ncbi_101104407(ACOT2);ncbi_101121563(CYP2J2);ncbi_101122401(ADCY9);ncbi_443515(IGF1R);ncbi_443535(LDLR)
Toxoplasmosis	13	133	0.0329981	0.295885	ko05145	ncbi_100913152(HSPA1B);ncbi_101107969(LAMA4);ncbi_101108696(HLA-DQA2);ncbi_101108962(HLA-DQA2);ncbi_101112844(HSPA8);ncbi_101117453(CCR5);ncbi_101117527(CYCS);ncbi_101118514(BoLA-DQB);ncbi_101120665(MAPK10);ncbi_101121444(LAMA5);ncbi_101122429(LAMC3);ncbi_114108605(HSPA1B);ncbi_443535(LDLR)
Graft-versus-host disease	8	68	0.0337328	0.295885	ko05332	ncbi_101106374(HLA-A);ncbi_101108171(HLA-A);ncbi_101108696(HLA-DQA2);ncbi_101108962(HLA-DQA2);ncbi_101113217(HLA-A);ncbi_101118514(BoLA-DQB);ncbi_106990117(HLA-B);ncbi_114108675(HLA-A)
Type I diabetes mellitus	8	69	0.0363846	0.308365	ko04940	ncbi_101106374(HLA-A);ncbi_101108171(HLA-A);ncbi_101108696(HLA-DQA2);ncbi_101108962(HLA-DQA2);ncbi_101113217(HLA-A);ncbi_101118514(BoLA-DQB);ncbi_106990117(HLA-B);ncbi_114108675(HLA-A)
Metabolism of xenobiotics by cytochrome P450	9	82	0.0372791	0.308365	ko00980	ncbi_100170113(CYP1A1);ncbi_101103462(MGST1);ncbi_101107401(GSTM1);ncbi_101108502(ALDH3A1);ncbi_101111038(EPHX1);ncbi_101121539(CYP2F3);ncbi_106990219(GSTM1);ncbi_443054(GSTA2);MSTRG.4689(MGST1)
Fatty acid biosynthesis	3	14	0.0391386	0.308365	ko00061	ncbi_100170327(FASN);ncbi_101114816(ACACB);ncbi_443186(ACACA)
Amphetamine addiction	8	70	0.0391734	0.308365	ko05031	ncbi_100216465(ATF4);ncbi_100568292(DRD1);ncbi_101106284(Ppp1cc);ncbi_101113882(CREB3L1);ncbi_101118179(GRIN2B);ncbi_101120619(TH);ncbi_443218(FOS);ncbi_443453(CAMK2A)
MicroRNAs in cancer	16	180	0.0418717	0.321365	ko05206	ncbi_100144761(CDK6);ncbi_100144763(CCND1);ncbi_101108012(HDAC4);ncbi_101108051(BMF);ncbi_101110051(FOXP2);ncbi_101113178(CDC25A);ncbi_101114648(FOXP1);ncbi_101115152(PAK4);ncbi_101118337(TNC);ncbi_101120910(HMOX1);ncbi_101123247(PIK3R3);ncbi_106991367(IRS2);ncbi_114114475(ABCB1);ncbi_443103(VEGFA);ncbi_443452(SLC7A1);ncbi_554324(FGFR3)
Adrenergic signaling in cardiomyocytes	14	153	0.0446355	0.323801	ko04261	ncbi_100216465(ATF4);ncbi_101106284(Ppp1cc);ncbi_101107568(ATP1B3);ncbi_101111554(ACTC1);ncbi_101111582(Scn5a);ncbi_101113622(SCN4B);ncbi_101113882(CREB3L1);ncbi_101115165(CACNA2D2);ncbi_101116675(CACNG7);ncbi_101121961(TNNI3);ncbi_101122401(ADCY9);ncbi_114117869(ATP1B3);ncbi_443453(CAMK2A);MSTRG.16899(Ppp2r2d)
Biosynthesis of amino acids	8	72	0.0451712	0.323801	ko01230	ncbi_101102380(Mat2a);ncbi_101106412(ASL);ncbi_101111328(PHGDH);ncbi_101113161(PYCR1);ncbi_101120382(PSAT1);ncbi_114110581(GAPDH);ncbi_443005(GAPDH);ncbi_780468(ARG2)
Insulin secretion	9	85	0.0453532	0.323801	ko04911	ncbi_100216465(ATF4);ncbi_101105660(Kcnn2);ncbi_101107568(ATP1B3);ncbi_101110084(TRPM4);ncbi_101113882(CREB3L1);ncbi_101122401(ADCY9);ncbi_114117869(ATP1B3);ncbi_443231(ADCYAP1R1);ncbi_443453(CAMK2A)
Relaxin signaling pathway	13	141	0.0491914	0.329241	ko04926	ncbi_100101231(COL3A1);ncbi_100216465(ATF4);ncbi_101113882(CREB3L1);ncbi_101115552(COL4A1);ncbi_101115805(COL4A2);ncbi_101120665(MAPK10);ncbi_101122401(ADCY9);ncbi_101123247(PIK3R3);ncbi_443077(NOS3);ncbi_443103(VEGFA);ncbi_443218(FOS);ncbi_443483(COL1A1);ncbi_443512(COL1A2)
Sphingolipid signaling pathway	12	128	0.0516306	0.329241	ko04071	ncbi_101102559(CERS4);ncbi_101103800(ROCK2);ncbi_101110257(SPTLC3);ncbi_101118389(DEGS2);ncbi_101120665(MAPK10);ncbi_101120781(BDKRB2);ncbi_101122252(CERS6);ncbi_101123247(PIK3R3);ncbi_101123535(ACER2);ncbi_114117545(SPTLC3);ncbi_443077(NOS3);MSTRG.16899(Ppp2r2d)
Amoebiasis	12	128	0.0516306	0.329241	ko05146	ncbi_100101231(COL3A1);ncbi_101107969(LAMA4);ncbi_101115552(COL4A1);ncbi_101115754(HSPB1);ncbi_101115805(COL4A2);ncbi_101121444(LAMA5);ncbi_101122429(LAMC3);ncbi_101123247(PIK3R3);ncbi_443483(COL1A1);ncbi_443512(COL1A2);ncbi_780468(ARG2);MSTRG.14833(IGHA2)
Prion diseases	5	37	0.0519567	0.329241	ko05020	ncbi_100913152(HSPA1B);ncbi_101102931(C7);ncbi_101112844(HSPA8);ncbi_101122561(STIP1);ncbi_114108605(HSPA1B)
Cocaine addiction	6	49	0.0525166	0.329241	ko05030	ncbi_100216465(ATF4);ncbi_100568292(DRD1);ncbi_101113882(CREB3L1);ncbi_101116818(Gpsm1);ncbi_101118179(GRIN2B);ncbi_101120619(TH)
Cellular senescence	15	171	0.0525498	0.329241	ko04218	ncbi_100144761(CDK6);ncbi_100144763(CCND1);ncbi_100885762(GADD45G);ncbi_101102288(CCNB3);ncbi_101106284(Ppp1cc);ncbi_101106374(HLA-A);ncbi_101106963(E2F4);ncbi_101108171(HLA-A);ncbi_101110290(MRAS);ncbi_101112835(LIN9);ncbi_101113178(CDC25A);ncbi_101113217(HLA-A);ncbi_101123247(PIK3R3);ncbi_106990117(HLA-B);ncbi_114108675(HLA-A)
Thyroid hormone synthesis	8	75	0.0552473	0.33579	ko04918	ncbi_100216465(ATF4);ncbi_100820742(GPX1);ncbi_101105489(PAX8);ncbi_101107568(ATP1B3);ncbi_101110596(GPX2);ncbi_101113882(CREB3L1);ncbi_101122401(ADCY9);ncbi_114117869(ATP1B3)
Hepatocellular carcinoma	16	187	0.0557827	0.33579	ko05225	ncbi_100144761(CDK6);ncbi_100144763(CCND1);ncbi_100885762(GADD45G);ncbi_101101932(FZD4);ncbi_101103462(MGST1);ncbi_101107401(GSTM1);ncbi_101110262(Dpf1);ncbi_101114236(Fzd9);ncbi_101117116(TXNRD3);ncbi_101120910(HMOX1);ncbi_101123247(PIK3R3);ncbi_106990219(GSTM1);ncbi_443054(GSTA2);ncbi_443075(HGF);ncbi_443515(IGF1R);MSTRG.4689(MGST1)
Aldosterone-regulated sodium reabsorption	5	39	0.0627785	0.370635	ko04960	ncbi_101107568(ATP1B3);ncbi_101109342(SLC9A3R2);ncbi_101123247(PIK3R3);ncbi_114117869(ATP1B3);ncbi_443530(HSD11B2)
Longevity regulating pathway - worm	9	91	0.0648115	0.375418	ko04212	ncbi_100216465(ATF4);ncbi_101103462(MGST1);ncbi_101107401(GSTM1);ncbi_101117406(GABARAPL1);ncbi_101120665(MAPK10);ncbi_106990219(GSTM1);ncbi_443054(GSTA2);ncbi_443185(SCD);MSTRG.4689(MGST1)
Bladder cancer	5	40	0.0686302	0.379265	ko05219	ncbi_100144763(CCND1);ncbi_101118185(HBEGF);ncbi_101123304(DAPK3);ncbi_443103(VEGFA);ncbi_554324(FGFR3)
Vitamin B6 metabolism	2	8	0.0689125	0.379265	ko00750	ncbi_101120382(PSAT1);ncbi_443049(PDXK)
Small cell lung cancer	10	106	0.0691819	0.379265	ko05222	ncbi_100144761(CDK6);ncbi_100144763(CCND1);ncbi_100885762(GADD45G);ncbi_101107969(LAMA4);ncbi_101115552(COL4A1);ncbi_101115805(COL4A2);ncbi_101117527(CYCS);ncbi_101121444(LAMA5);ncbi_101122429(LAMC3);ncbi_101123247(PIK3R3)
PI3K-Akt signaling pathway	30	409	0.0704963	0.37969	ko04151	ncbi_100037690(PCK1);ncbi_100144761(CDK6);ncbi_100144763(CCND1);ncbi_100216465(ATF4);ncbi_101106926(PKN3);ncbi_101107864(COMP);ncbi_101107969(LAMA4);ncbi_101111126(IL7R);ncbi_101113882(CREB3L1);ncbi_101115445(ITGA7);ncbi_101115552(COL4A1);ncbi_101115805(COL4A2);ncbi_101117377(ITGA10);ncbi_101118337(TNC);ncbi_101121444(LAMA5);ncbi_101122429(LAMC3);ncbi_101123247(PIK3R3);ncbi_114112948(NTRK2);ncbi_…
Sphingolipid metabolism	6	53	0.0718432	0.380273	ko00600	ncbi_101102559(CERS4);ncbi_101110257(SPTLC3);ncbi_101118389(DEGS2);ncbi_101122252(CERS6);ncbi_101123535(ACER2);ncbi_114117545(SPTLC3)
Leishmaniasis	8	80	0.0750085	0.390299	ko05140	ncbi_100192433(FCGR3);ncbi_101106094(NCF2);ncbi_101108131(C3);ncbi_101108696(HLA-DQA2);ncbi_101108962(HLA-DQA2);ncbi_101118514(BoLA-DQB);ncbi_443218(FOS);MSTRG.14833(IGHA2)
Pancreatic cancer	8	81	0.0794125	0.406328	ko05212	ncbi_100144761(CDK6);ncbi_100144763(CCND1);ncbi_100885762(GADD45G);ncbi_101120665(MAPK10);ncbi_101123247(PIK3R3);ncbi_114108599(CDC42);ncbi_443103(VEGFA);MSTRG.5042(Ralbp1)
Estrogen signaling pathway	12	140	0.0883002	0.432158	ko04915	ncbi_100216465(ATF4);ncbi_100913152(HSPA1B);ncbi_101112844(HSPA8);ncbi_101113882(CREB3L1);ncbi_101116101(KCNJ5);ncbi_101118185(HBEGF);ncbi_101122401(ADCY9);ncbi_101123247(PIK3R3);ncbi_114108605(HSPA1B);ncbi_443066(ESR2);ncbi_443077(NOS3);ncbi_443218(FOS)
HTLV-I infection	22	292	0.088525	0.432158	ko05166	ncbi_100144763(CCND1);ncbi_100216465(ATF4);ncbi_101101932(FZD4);ncbi_101106374(HLA-A);ncbi_101108171(HLA-A);ncbi_101108696(HLA-DQA2);ncbi_101108962(HLA-DQA2);ncbi_101109367(TP53INP1);ncbi_101110290(MRAS);ncbi_101111137(Fosl1);ncbi_101113217(HLA-A);ncbi_101114236(Fzd9);ncbi_101116073(ATF3);ncbi_101118514(BoLA-DQB);ncbi_101120665(MAPK10);ncbi_101122401(ADCY9);ncbi_101122630(RANBP1);ncbi_101123247(P…
Regulation of lipolysis in adipocyte	6	56	0.088684	0.432158	ko04923	ncbi_100137067(FABP4);ncbi_100169699(LIPE);ncbi_101120029(PLA2G16);ncbi_101122401(ADCY9);ncbi_101123247(PIK3R3);ncbi_106991367(IRS2)
Fatty acid metabolism	6	57	0.0947374	0.453939	ko01212	ncbi_100170327(FASN);ncbi_101117635(EHHADH);ncbi_101118274(ELOVL6);ncbi_443185(SCD);ncbi_443186(ACACA);ncbi_443484(HACD1)
Arginine biosynthesis	3	20	0.096111	0.453939	ko00220	ncbi_101106412(ASL);ncbi_443077(NOS3);ncbi_780468(ARG2)
Cholinergic synapse	10	114	0.100772	0.459484	ko04725	ncbi_100216465(ATF4);ncbi_101106197(KCNJ14);ncbi_101113882(CREB3L1);ncbi_101120673(KCNQ3);ncbi_101122401(ADCY9);ncbi_101122655(KCNQ4);ncbi_101123247(PIK3R3);ncbi_101123388(KCNJ12);ncbi_443218(FOS);ncbi_443453(CAMK2A)
Chemical carcinogenesis	9	100	0.102642	0.459484	ko05204	ncbi_100170113(CYP1A1);ncbi_101103462(MGST1);ncbi_101107401(GSTM1);ncbi_101108502(ALDH3A1);ncbi_101111038(EPHX1);ncbi_105614373(CYP2B4);ncbi_106990219(GSTM1);ncbi_443054(GSTA2);MSTRG.4689(MGST1)
Lysine degradation	7	72	0.103421	0.459484	ko00310	ncbi_101103648(NSD2);ncbi_101111306(PLOD1);ncbi_101115990(SETD7);ncbi_101116417(SUV39H2);ncbi_101117635(EHHADH);ncbi_101121661(AADAT);ncbi_101122242(SETMAR)
HIF-1 signaling pathway	10	115	0.10523	0.459484	ko04066	ncbi_100885768(TFRC);ncbi_101107621(PFKFB3);ncbi_101120910(HMOX1);ncbi_101123247(PIK3R3);ncbi_114110581(GAPDH);ncbi_443005(GAPDH);ncbi_443077(NOS3);ncbi_443103(VEGFA);ncbi_443453(CAMK2A);ncbi_443515(IGF1R)
TNF signaling pathway	11	130	0.106719	0.459484	ko04668	ncbi_100216465(ATF4);ncbi_101113882(CREB3L1);ncbi_101118877(RIPK3);ncbi_101120093(CCL2);ncbi_101120665(MAPK10);ncbi_101122097(DAB2IP);ncbi_101123247(PIK3R3);ncbi_105614551(Tgtp2);ncbi_442997(CXCL10);ncbi_443218(FOS);ncbi_780465(NOD2)
Kaposi sarcoma-associated herpesvirus infection	17	221	0.107273	0.459484	ko05167	ncbi_100144761(CDK6);ncbi_100144763(CCND1);ncbi_101106374(HLA-A);ncbi_101108131(C3);ncbi_101108171(HLA-A);ncbi_101113217(HLA-A);ncbi_101117406(GABARAPL1);ncbi_101117453(CCR5);ncbi_101117527(CYCS);ncbi_101119220(ATG14);ncbi_101120665(MAPK10);ncbi_101123247(PIK3R3);ncbi_106990117(HLA-B);ncbi_114108675(HLA-A);ncbi_443103(VEGFA);ncbi_443111(CCR3);ncbi_443218(FOS)
Lysine biosynthesis	1	2	0.107935	0.459484	ko00300	ncbi_101121661(AADAT)
Legionellosis	7	73	0.109258	0.459484	ko05134	ncbi_100913152(HSPA1B);ncbi_101105634(CLK1);ncbi_101108131(C3);ncbi_101110450(NAIP);ncbi_101112844(HSPA8);ncbi_101117527(CYCS);ncbi_114108605(HSPA1B)
Renal cell carcinoma	7	75	0.121446	0.484965	ko05211	ncbi_100135448(ARNT2);ncbi_101115152(PAK4);ncbi_101123247(PIK3R3);ncbi_114108599(CDC42);ncbi_114113232(Rap1b);ncbi_443075(HGF);ncbi_443103(VEGFA)
Fatty acid elongation	4	35	0.126889	0.484965	ko00062	ncbi_101104407(ACOT2);ncbi_101118274(ELOVL6);ncbi_101121789(ACOT7);ncbi_443484(HACD1)
MAPK signaling pathway	22	306	0.127232	0.484965	ko04010	ncbi_100216465(ATF4);ncbi_100885762(GADD45G);ncbi_100913152(HSPA1B);ncbi_101101969(RASGRP3);ncbi_101108689(TAOK3);ncbi_101110290(MRAS);ncbi_101112844(HSPA8);ncbi_101115165(CACNA2D2);ncbi_101115754(HSPB1);ncbi_101116675(CACNG7);ncbi_101119037(MAPK8IP2);ncbi_101120665(MAPK10);ncbi_114108599(CDC42);ncbi_114108605(HSPA1B);ncbi_114112948(NTRK2);ncbi_114113217(Erbb4);ncbi_114113232(Rap1b);ncbi_443075(H…
Viral carcinogenesis	17	227	0.127801	0.484965	ko05203	ncbi_100144761(CDK6);ncbi_100144763(CCND1);ncbi_100216465(ATF4);ncbi_101106374(HLA-A);ncbi_101108012(HDAC4);ncbi_101108131(C3);ncbi_101108171(HLA-A);ncbi_101109245(HDAC6);ncbi_101113217(HLA-A);ncbi_101113882(CREB3L1);ncbi_101117453(CCR5);ncbi_101122630(RANBP1);ncbi_101123247(PIK3R3);ncbi_106990117(HLA-B);ncbi_114108599(CDC42);ncbi_114108675(HLA-A);ncbi_443111(CCR3)
Natural killer cell mediated cytotoxicity	14	181	0.130353	0.484965	ko04650	ncbi_100192433(FCGR3);ncbi_101106374(HLA-A);ncbi_101106498(ULBP1);ncbi_101108171(HLA-A);ncbi_101110137(VAV2);ncbi_101113217(HLA-A);ncbi_101114153(TNFSF10);ncbi_101123247(PIK3R3);ncbi_106990117(HLA-B);ncbi_106991302(ULBP1);ncbi_114108675(HLA-A);ncbi_114116078(ULBP1);ncbi_114116116(ULBP1);MSTRG.14833(IGHA2)
PPAR signaling pathway	8	91	0.131636	0.484965	ko03320	ncbi_100037690(PCK1);ncbi_100125354(PLIN2);ncbi_100137067(FABP4);ncbi_101102434(ME3);ncbi_101115230(ubq-1);ncbi_101117635(EHHADH);ncbi_101118587(GK);ncbi_443185(SCD)
NOD-like receptor signaling pathway	15	197	0.132409	0.484965	ko04621	ncbi_101105481(GBP3);ncbi_101110450(NAIP);ncbi_101112936(IFI16);ncbi_101117406(GABARAPL1);ncbi_101118877(RIPK3);ncbi_101119517(GBP1);ncbi_101119773(GBP7);ncbi_101120093(CCL2);ncbi_101120367(GBP5);ncbi_101120629(TRIP6);ncbi_101120665(MAPK10);ncbi_114108739(GBP2);ncbi_654403(TXNIP);ncbi_780465(NOD2);MSTRG.19184(GBP2)
Tryptophan metabolism	5	49	0.133889	0.484965	ko00380	ncbi_100170113(CYP1A1);ncbi_100196903(IDO1);ncbi_101117635(EHHADH);ncbi_101121661(AADAT);ncbi_101123646(AFMID)
Nicotinate and nicotinamide metabolism	4	36	0.136877	0.484965	ko00760	ncbi_101102696(QPRT);ncbi_101109197(NT5C3B);ncbi_101114607(NMRK2);ncbi_101119900(NT5C3A)
Drug metabolism - other enzymes	8	92	0.13765	0.484965	ko00983	ncbi_101103462(MGST1);ncbi_101107401(GSTM1);ncbi_101107953(Upp1);ncbi_101109670(Uck2);ncbi_101116336(CES1);ncbi_106990219(GSTM1);ncbi_443054(GSTA2);MSTRG.4689(MGST1)
Platinum drug resistance	8	92	0.13765	0.484965	ko01524	ncbi_101103462(MGST1);ncbi_101107401(GSTM1);ncbi_101117527(CYCS);ncbi_101123247(PIK3R3);ncbi_101123490(BBC3);ncbi_106990219(GSTM1);ncbi_443054(GSTA2);MSTRG.4689(MGST1)
Longevity regulating pathway - mammal	8	92	0.13765	0.484965	ko04211	ncbi_100216465(ATF4);ncbi_101113882(CREB3L1);ncbi_101115063(ATG13);ncbi_101115970(SESN1);ncbi_101122401(ADCY9);ncbi_101123247(PIK3R3);ncbi_106991367(IRS2);ncbi_443515(IGF1R)
Progesterone-mediated oocyte maturation	8	92	0.13765	0.484965	ko04914	ncbi_101102288(CCNB3);ncbi_101105713(PLK1);ncbi_101113178(CDC25A);ncbi_101119784(Pkmyt1);ncbi_101120665(MAPK10);ncbi_101122401(ADCY9);ncbi_101123247(PIK3R3);ncbi_443515(IGF1R)
Autophagy - animal	11	137	0.139013	0.484965	ko04140	ncbi_101110290(MRAS);ncbi_101113426(PRKCQ);ncbi_101115063(ATG13);ncbi_101117406(GABARAPL1);ncbi_101119069(Tp53inp2);ncbi_101119220(ATG14);ncbi_101120665(MAPK10);ncbi_101123247(PIK3R3);ncbi_101123304(DAPK3);ncbi_106991367(IRS2);ncbi_443515(IGF1R)
Dopaminergic synapse	11	137	0.139013	0.484965	ko04728	ncbi_100216465(ATF4);ncbi_100568292(DRD1);ncbi_101106284(Ppp1cc);ncbi_101113882(CREB3L1);ncbi_101116101(KCNJ5);ncbi_101118179(GRIN2B);ncbi_101120619(TH);ncbi_101120665(MAPK10);ncbi_443218(FOS);ncbi_443453(CAMK2A);MSTRG.16899(Ppp2r2d)
Parathyroid hormone synthesis, secretion and action	9	108	0.144906	0.490858	ko04928	ncbi_100216465(ATF4);ncbi_101108953(PDE4D);ncbi_101113882(CREB3L1);ncbi_101114494(NR4A2);ncbi_101117966(MMP17);ncbi_101118185(HBEGF);ncbi_101122213(MMP15);ncbi_101122401(ADCY9);ncbi_443218(FOS)
Rheumatoid arthritis	9	108	0.144906	0.490858	ko05323	ncbi_101108696(HLA-DQA2);ncbi_101108962(HLA-DQA2);ncbi_101118514(BoLA-DQB);ncbi_101120093(CCL2);ncbi_101122020(ATP6V0E2);ncbi_443103(VEGFA);ncbi_443218(FOS);ncbi_780517(TNFSF13B);MSTRG.14833(IGHA2)
Histidine metabolism	3	24	0.145499	0.490858	ko00340	ncbi_101108052(HDC);ncbi_101108502(ALDH3A1);ncbi_101121435(ASPA)
Pertussis	7	79	0.147796	0.492085	ko05133	ncbi_101108131(C3);ncbi_101112891(C4A);ncbi_101115321(C2);ncbi_101120665(MAPK10);ncbi_101121454(SERPING1);ncbi_101123419(C4A);ncbi_443218(FOS)
Dilated cardiomyopathy (DCM)	8	94	0.150082	0.492085	ko05414	ncbi_101111554(ACTC1);ncbi_101115165(CACNA2D2);ncbi_101115445(ITGA7);ncbi_101116675(CACNG7);ncbi_101117377(ITGA10);ncbi_101121961(TNNI3);ncbi_101122401(ADCY9);MSTRG.14833(IGHA2)
African trypanosomiasis	5	51	0.151202	0.492085	ko05143	ncbi_100196903(IDO1);ncbi_101107969(LAMA4);ncbi_101121414(APOL3);ncbi_105605766(APOL2);MSTRG.14833(IGHA2)
Insulin signaling pathway	12	155	0.152274	0.492085	ko04910	ncbi_100037690(PCK1);ncbi_100169699(LIPE);ncbi_100170327(FASN);ncbi_101106003(Prkar2b);ncbi_101106284(Ppp1cc);ncbi_101111588(PTPRF);ncbi_101114816(ACACB);ncbi_101117815(SH2B2);ncbi_101120665(MAPK10);ncbi_101123247(PIK3R3);ncbi_106991367(IRS2);ncbi_443186(ACACA)
